# Supplementary material for: Influence of infrastructure, ecology, and underpass-dimensions on multi-year use of Standard Gauge Railway underpasses by mammals in Tsavo, Kenya
Source: Sci Rep. 2022 Apr 5;12:5698. doi: 10.1038/s41598-022-09555-5 (PMC8983743; doi:10.1038/s41598-022-09555-5)
Supplement: Supplementary file 2 — Supplementary Information 2. [file 41598_2022_9555_MOESM2_ESM.xlsx]

## Sheet: Antelopes
	cond((Int))	disp((Int))	cond(All_Livestock_1)	cond(Dist_Road_K)	cond(Fencing_2)	cond(Height_meters)	cond(ndvi)	cond(Underpass_type)	cond(Water_source)	cond(Width_meters)	df	logLik	AICc	delta	weight		Family: binomial ( logit )
30	-9.41815	+	-1.17854	NA	1.5008	0.948797	-1.73016	NA	NA	NA	6	-1530.61	3073.22	0	0.257338		Formula: Antelopes_all_1 ~ ndvi + Dist_Road_K + Fencing_2 + Water_source +
32	-9.62805	+	-1.16906	0.456907	+	0.960089	-1.73803	NA	NA	NA	7	-1530.4	3074.82	1.59852	0.115715		Underpass_type + All_Livestock_1 + Width_meters + Height_meters +
62	-9.004	+	-1.18523	NA	+	0.904038	-1.72593	+	NA	NA	7	-1530.54	3075.09	1.87336	0.100858		(1 | Unique_ID)
158	-9.47955	+	-1.17993	NA	+	0.965051	-1.73133	NA	NA	-0.000226461	7	-1530.58	3075.16	1.94283	0.0974147		Data: nomitdata
94	-9.36442	+	-1.18482	NA	+	0.951893	-1.73101	NA	-0.0128356	NA	7	-1530.59	3075.18	1.96524	0.0963291
64	-9.04598	+	-1.17733	0.549254	+	0.894865	-1.73319	+	NA	NA	8	-1530.27	3076.55	3.32629	0.0487764		AIC BIC logLik deviance df.resid
96	-9.56926	+	-1.17622	0.464856	+	0.963945	-1.73915	NA	-0.0149803	NA	8	-1530.38	3076.77	3.55115	0.0435895		3080.4 3154.3 -1530.2 3060.4 11900
160	-9.67848	+	-1.17039	0.449375	+	0.974166	-1.73893	NA	NA	-0.000198527	8	-1530.38	3076.77	3.55582	0.0434879
190	-9.05205	+	-1.18705	NA	+	0.919818	-1.72705	+	NA	-0.000249392	8	-1530.51	3077.02	3.80445	0.0384043		Random effects:
126	-8.92731	+	-1.19258	NA	+	0.905808	-1.72666	+	-0.0145037	NA	8	-1530.52	3077.05	3.82896	0.0379363
222	-9.44035	+	-1.18279	NA	+	0.963441	-1.73155	NA	-0.00649922	-0.000182729	8	-1530.57	3077.16	3.93822	0.0359196		Conditional model:
128	-8.9528	+	-1.18616	0.562559	+	0.896923	-1.7343	+	-0.0179446	NA	9	-1530.23	3078.48	5.25824	0.0185649		Groups Name Variance Std.Dev.
192	-9.08923	+	-1.17903	0.542954	+	0.909302	-1.73409	+	NA	-0.000226183	9	-1530.24	3078.49	5.2709	0.0184478		Unique_ID (Intercept) 2.581 1.606
224	-9.6189	+	-1.17493	0.45758	+	0.971798	-1.73938	NA	-0.0105299	-0.000127041	9	-1530.37	3078.76	5.53998	0.0161255		Number of obs: 11910, groups: Unique_ID, 72
254	-9.00143	+	-1.1905	NA	+	0.917464	-1.72716	+	-0.0076841	-0.000197633	9	-1530.5	3079.02	5.79731	0.0141786
256	-9.00391	+	-1.18484	0.555128	+	0.905152	-1.73455	+	-0.0131623	-0.00013738	10	-1530.22	3080.46	7.24508	0.00687474		Conditional model:
29	-9.64953	+	NA	NA	+	0.964207	-1.72583	NA	NA	NA	5	-1536.43	3082.86	9.64279	0.002073			Estimate	Std. Error	z value	Pr(>|z|)
31	-9.92765	+	NA	0.614642	+	0.978962	-1.73479	NA	NA	NA	6	-1536.1	3084.21	10.9893	0.00105733		(Intercept)	-9.00391	1.43764	-6.263	3.78e-10	***
157	-9.69927	+	NA	NA	+	0.977332	-1.72666	NA	NA	-0.000183553	6	-1536.41	3084.83	11.6106	0.000774974		ndvi	-1.73455	0.467466	-3.711	0.000207	***
61	-9.45053	+	NA	NA	+	0.942688	-1.72417	+	NA	NA	6	-1536.41	3084.84	11.6181	0.00077208		Dist_Road_K	0.555128	0.745733	0.744	0.456631
93	-9.69236	+	NA	NA	+	0.961426	-1.72516	NA	0.0107344	NA	6	-1536.42	3084.84	11.6215	0.000770772		Fencing_2Y	1.50145	0.10556	14.224	< 2e-16	***
14	-9.75891	+	-1.17619	NA	+	0.938976	NA	NA	NA	NA	5	-1537.87	3085.75	12.5273	0.000490047		Water_source	-0.0131623	0.0769476	-0.171	0.86418
63	-9.49961	+	NA	0.683242	+	0.930949	-1.73192	+	NA	NA	7	-1536.03	3086.08	12.8584	0.000415285		Underpass_typeCulvert	-0.427919	0.786841	-0.544	0.586549
159	-9.96486	+	NA	0.609394	+	0.98927	-1.73537	NA	NA	-0.000145576	7	-1536.09	3086.19	12.9702	0.000392695		All_Livestock_1	-1.18484	0.385449	-3.074	0.002113	**
95	-9.95567	+	NA	0.609703	+	0.976845	-1.73424	NA	0.00761991	NA	7	-1536.09	3086.2	12.98	0.000390777		Width_meters	-0.0001374	0.0010689	-0.129	0.89773
221	-9.82735	+	NA	NA	+	0.982298	-1.72593	NA	0.0219654	-0.000331866	7	-1536.37	3086.76	13.5376	0.000295694		Height_meters	0.905152	0.186495	4.853	1.21e-06	***
189	-9.48819	+	NA	NA	+	0.95499	-1.72492	+	NA	-0.000194823	7	-1536.4	3086.8	13.5822	0.000289182		---
125	-9.5016	+	NA	NA	+	0.941271	-1.72365	+	0.0100574	NA	7	-1536.4	3086.82	13.6001	0.000286598		Signif. codes: 0 ‘***’ 0.001 ‘**’ 0.01 ‘*’ 0.05 ‘.’ 0.1 ‘ ’ 1
16	-9.93261	+	-1.16782	0.371966	+	0.948319	NA	NA	NA	NA	6	-1537.73	3087.47	14.2499	0.000207095
46	-9.23639	+	-1.18545	NA	+	0.88264	NA	+	NA	NA	6	-1537.76	3087.53	14.3153	0.000200433
142	-9.80909	+	-1.17727	NA	+	0.952154	NA	NA	NA	-0.000182842	6	-1537.85	3087.71	14.4885	0.000183811		Family: binomial ( logit )
78	-9.71569	+	-1.18145	NA	+	0.941518	NA	NA	-0.0104105	NA	6	-1537.86	3087.72	14.5038	0.000182411		Formula: Antelopes_all_1 ~ ndvi + Fencing_2 + All_Livestock_1 + Height_meters + (1 | Unique_ID)
191	-9.53121	+	NA	0.678975	+	0.94148	-1.73249	+	NA	-0.000165643	8	-1536.02	3088.05	14.8334	0.000154692		Data: nomitdata
127	-9.52767	+	NA	0.678382	+	0.930201	-1.73156	+	0.00564655	NA	8	-1536.03	3088.07	14.8547	0.000153052
223	-10.054	+	NA	0.59477	+	0.992641	-1.73462	NA	0.0164393	-0.000257388	8	-1536.07	3088.15	14.9313	0.000147301		AIC BIC logLik deviance df.resid
253	-9.62552	+	NA	NA	+	0.961114	-1.72432	+	0.0214903	-0.000339532	8	-1536.36	3088.73	15.513	0.000110128		3073.2 3117.5 -1530.6 3061.2 11904
48	-9.27465	+	-1.17803	0.476429	+	0.874727	NA	+	NA	NA	7	-1537.55	3089.1	15.8858	9.14e-05
80	-9.88549	+	-1.17374	0.378194	+	0.951454	NA	NA	-0.0120898	NA	7	-1537.71	3089.44	16.2182	7.74e-05		Random effects:
144	-9.97381	+	-1.1689	0.365996	+	0.959718	NA	NA	NA	-0.000159992	7	-1537.72	3089.44	16.2213	7.73e-05
174	-9.27759	+	-1.18696	NA	+	0.896049	NA	+	NA	-0.000210734	7	-1537.74	3089.48	16.2637	7.57e-05		Conditional model:
110	-9.17029	+	-1.19199	NA	+	0.884171	NA	+	-0.0125238	NA	7	-1537.75	3089.5	16.2809	7.5e-05		Groups Name Variance Std.Dev.
206	-9.77748	+	-1.1797	NA	+	0.950892	NA	NA	-0.00527364	-0.000147261	7	-1537.85	3089.7	16.4858	6.77e-05		Unique_ID (Intercept) 2.564 1.601
255	-9.6241	+	NA	0.663734	+	0.945935	-1.73193	+	0.0147264	-0.000265562	9	-1536	3090.02	16.8034	5.78e-05		Number of obs: 11910, groups: Unique_ID, 72
112	-9.19459	+	-1.18586	0.487694	+	0.876498	NA	+	-0.0154408	NA	8	-1537.52	3091.05	17.8333	3.45e-05
176	-9.31163	+	-1.17949	0.470992	+	0.886951	NA	+	NA	-0.0001905	8	-1537.53	3091.06	17.8447	3.43e-05		Conditional model:
208	-9.92586	+	-1.17265	0.372386	+	0.957799	NA	NA	-0.00847406	-0.000102402	8	-1537.71	3091.43	18.2112	2.86e-05			Estimate	Std. Error	z value	Pr(>|z|)
238	-9.23287	+	-1.19013	NA	+	0.893974	NA	+	-0.0067824	-0.000165364	8	-1537.73	3091.48	18.2581	2.79e-05		(Intercept)	-9.4181	0.6805	-13.839	< 2e-16	***
240	-9.23715	+	-1.18472	0.481568	+	0.883296	NA	+	-0.0114583	-0.000113315	9	-1537.51	3093.04	19.8245	1.28e-05		ndvi	-1.7302	0.4671	-3.704	0.000212	***
13	-9.98807	+	NA	NA	+	0.954307	NA	NA	NA	NA	4	-1543.69	3095.38	22.1639	3.96e-06		Fencing_2Y	1.5008	0.1055	14.222	< 2e-16	***
54	-2.61208	+	-1.15639	NA	+	NA	-1.72541	+	NA	NA	6	-1541.73	3095.46	22.2386	3.81e-06		All_Livestock_1	-1.1785	0.3829	-3.078	0.002084	**
56	-2.81804	+	-1.14612	1.05607	+	NA	-1.73473	+	NA	NA	7	-1541.05	3096.12	22.8982	2.74e-06		Height_meters	0.9488	0.1224	7.75	9.17e-15	***
182	-2.94482	+	-1.15236	NA	+	NA	-1.72166	+	NA	0.00132082	7	-1541.06	3096.12	22.9029	2.74e-06		---
184	-3.15125	+	-1.14195	1.04604	+	NA	-1.73117	+	NA	0.0013304	8	-1540.38	3096.76	23.5445	1.99e-06		Signif. codes: 0 ‘***’ 0.001 ‘**’ 0.01 ‘*’ 0.05 ‘.’ 0.1 ‘ ’ 1
15	-10.2313	+	NA	0.530249	+	0.967209	NA	NA	NA	NA	5	-1543.43	3096.87	23.6559	1.88e-06
45	-9.68814	+	NA	NA	+	0.921933	NA	+	NA	NA	5	-1543.66	3097.32	24.1022	1.5e-06
77	-10.039	+	NA	NA	+	0.950936	NA	NA	0.0128883	NA	5	-1543.67	3097.35	24.1304	1.48e-06
141	-10.0267	+	NA	NA	+	0.964409	NA	NA	NA	-0.000140763	5	-1543.68	3097.36	24.1443	1.47e-06
118	-2.66207	+	-1.15375	NA	+	NA	-1.72518	+	0.0082002	NA	7	-1541.72	3097.45	24.2314	1.41e-06
246	-2.7405	+	-1.16672	NA	+	NA	-1.72216	+	-0.0450631	0.00160091	8	-1540.94	3097.89	24.6672	1.13e-06
120	-2.82299	+	-1.14585	1.05538	+	NA	-1.73469	+	0.000827989	NA	8	-1541.05	3098.12	24.9008	1.01e-06
248	-2.90943	+	-1.159	1.09107	+	NA	-1.7323	+	-0.0553241	0.00167476	9	-1540.2	3098.41	25.1927	8.71e-07
47	-9.73382	+	NA	0.610096	+	0.911482	NA	+	NA	NA	6	-1543.34	3098.69	25.4698	7.58e-07
79	-10.2688	+	NA	0.523712	+	0.964328	NA	NA	0.0102839	NA	6	-1543.42	3098.85	25.6357	6.98e-07
143	-10.2592	+	NA	0.526351	+	0.974899	NA	NA	NA	-0.000108057	6	-1543.43	3098.86	25.6455	6.94e-07
205	-10.1603	+	NA	NA	+	0.969593	NA	NA	0.0229784	-0.00029601	6	-1543.64	3099.28	26.0602	5.64e-07
109	-9.74808	+	NA	NA	+	0.92025	NA	+	0.0118429	NA	6	-1543.64	3099.29	26.0747	5.6e-07
173	-9.719	+	NA	NA	+	0.931903	NA	+	NA	-0.000157156	6	-1543.64	3099.3	26.078	5.59e-07
175	-9.75929	+	NA	0.606699	+	0.91988	NA	+	NA	-0.000131351	7	-1543.33	3100.67	27.4539	2.81e-07
111	-9.77341	+	NA	0.60331	+	0.910422	NA	+	0.00798665	NA	7	-1543.33	3100.68	27.4589	2.8e-07
207	-10.3582	+	NA	0.510259	+	0.978619	NA	NA	0.0183089	-0.000232517	7	-1543.4	3100.81	27.594	2.62e-07
237	-9.8614	+	NA	NA	+	0.938279	NA	+	0.0222518	-0.000307011	7	-1543.6	3101.22	27.9998	2.14e-07
239	-9.8619	+	NA	0.589962	+	0.924802	NA	+	0.016294	-0.000241685	8	-1543.31	3102.63	29.4143	1.06e-07
53	-2.78661	+	NA	NA	+	NA	-1.72672	+	NA	NA	5	-1547.24	3104.48	31.261	4.19e-08
55	-3.02128	+	NA	1.20875	+	NA	-1.73585	+	NA	NA	6	-1546.44	3104.89	31.6702	3.42e-08
181	-3.14668	+	NA	NA	+	NA	-1.72292	+	NA	0.00143555	6	-1546.53	3105.07	31.8493	3.12e-08
183	-3.38114	+	NA	1.19579	+	NA	-1.73221	+	NA	0.00144542	7	-1545.72	3105.46	32.2366	2.57e-08
117	-2.98312	+	NA	NA	+	NA	-1.72566	+	0.032496	NA	6	-1547.17	3106.34	33.1261	1.65e-08
119	-3.16108	+	NA	1.18615	+	NA	-1.73489	+	0.0238576	NA	7	-1546.4	3106.82	33.5995	1.3e-08
245	-3.06408	+	NA	NA	+	NA	-1.72321	+	-0.0184171	0.00155051	7	-1546.51	3107.03	33.8155	1.17e-08
247	-3.25092	+	NA	1.22285	+	NA	-1.73293	+	-0.0302461	0.0016345	8	-1545.67	3107.36	34.143	9.92e-09
38	-2.99501	+	-1.15977	NA	+	NA	NA	+	NA	NA	5	-1548.96	3107.92	34.7033	7.5e-09
166	-3.32639	+	-1.15562	NA	+	NA	NA	+	NA	0.00131797	6	-1548.26	3108.52	35.3009	5.56e-09
40	-3.18655	+	-1.14949	0.971003	+	NA	NA	+	NA	NA	6	-1548.36	3108.74	35.5181	4.99e-09
168	-3.51811	+	-1.14516	0.961028	+	NA	NA	+	NA	0.00132686	7	-1547.65	3109.32	36.0999	3.73e-09
102	-3.05233	+	-1.15663	NA	+	NA	NA	+	0.00940206	NA	6	-1548.95	3109.91	36.692	2.77e-09
230	-3.12812	+	-1.17005	NA	+	NA	NA	+	-0.0437046	0.00159012	7	-1548.14	3110.29	37.068	2.3e-09
104	-3.20283	+	-1.1486	0.968663	+	NA	NA	+	0.00274742	NA	7	-1548.36	3110.74	37.5193	1.83e-09
232	-3.28628	+	-1.16207	1.00366	+	NA	NA	+	-0.05301	0.0016566	8	-1547.48	3110.98	37.7611	1.62e-09
150	-5.6079	+	-1.05982	NA	+	NA	-1.76105	NA	NA	0.00342632	6	-1549.56	3111.13	37.9085	1.51e-09
214	-5.29165	+	-1.07589	NA	+	NA	-1.76162	NA	-0.063378	0.00379699	7	-1549.38	3112.77	39.5478	6.65e-10
152	-5.69072	+	-1.05687	0.227563	+	NA	-1.76308	NA	NA	0.00345832	7	-1549.53	3113.08	39.8591	5.69e-10
216	-5.38097	+	-1.07288	0.289146	+	NA	-1.76429	NA	-0.0665848	0.0038575	8	-1549.34	3114.69	41.4672	2.55e-10
22	-5.4931	+	-1.05231	NA	+	NA	-1.77464	NA	NA	NA	5	-1553.34	3116.69	43.4745	9.34e-11
37	-3.17145	+	NA	NA	+	NA	NA	+	NA	NA	4	-1554.52	3117.04	43.8229	7.84e-11
165	-3.53011	+	NA	NA	+	NA	NA	+	NA	0.00143332	5	-1553.78	3117.56	44.3413	6.05e-11
39	-3.39171	+	NA	1.12425	+	NA	NA	+	NA	NA	5	-1553.8	3117.6	44.3852	5.92e-11
167	-3.75009	+	NA	1.1113	+	NA	NA	+	NA	0.00144261	6	-1553.05	3118.1	44.884	4.61e-11
86	-5.87903	+	-1.03689	NA	+	NA	-1.77232	NA	0.0741131	NA	6	-1553.07	3118.15	44.928	4.51e-11
149	-5.74797	+	NA	NA	+	NA	-1.75718	NA	NA	0.00349716	5	-1554.13	3118.26	45.0394	4.27e-11
24	-5.48841	+	-1.05246	-0.0130398	+	NA	-1.77454	NA	NA	NA	6	-1553.34	3118.7	45.4764	3.43e-11
101	-3.37481	+	NA	NA	+	NA	NA	+	0.0336628	NA	5	-1554.44	3118.89	45.6705	3.11e-11
103	-3.5425	+	NA	1.09997	+	NA	NA	+	0.0257619	NA	6	-1553.75	3119.52	46.298	2.28e-11
229	-3.45361	+	NA	NA	+	NA	NA	+	-0.0170742	0.00153991	6	-1553.76	3119.53	46.3108	2.26e-11
231	-3.62983	+	NA	1.13601	+	NA	NA	+	-0.0279475	0.00161711	7	-1553	3120.02	46.8002	1.77e-11
151	-5.88131	+	NA	0.369227	+	NA	-1.76014	NA	NA	0.00354838	6	-1554.06	3120.13	46.9128	1.67e-11
213	-5.55895	+	NA	NA	+	NA	-1.75763	NA	-0.0384563	0.00372396	6	-1554.06	3120.13	46.9153	1.67e-11
88	-5.86191	+	-1.03744	-0.0502194	+	NA	-1.7719	NA	0.074286	NA	7	-1553.07	3120.15	46.9281	1.66e-11
215	-5.68439	+	NA	0.411718	+	NA	-1.76102	NA	-0.0431955	0.00380917	7	-1553.98	3121.98	48.7592	6.65e-12
21	-5.62872	+	NA	NA	+	NA	-1.77062	NA	NA	NA	4	-1557.83	3123.66	50.4453	2.86e-12
134	-5.99931	+	-1.05893	NA	+	NA	NA	NA	NA	0.00342281	5	-1557.12	3124.24	51.0205	2.15e-12
85	-6.11855	+	NA	NA	+	NA	-1.76754	NA	0.0951686	NA	5	-1557.4	3124.81	51.587	1.62e-12
23	-5.67262	+	NA	0.123134	+	NA	-1.77153	NA	NA	NA	5	-1557.82	3125.65	52.4344	1.06e-12
198	-5.69089	+	-1.07508	NA	+	NA	NA	NA	-0.0618229	0.00378443	6	-1556.94	3125.88	52.6651	9.43e-13
136	-6.05315	+	-1.05691	0.146606	+	NA	NA	NA	NA	0.00344356	6	-1557.11	3126.22	53.0003	7.97e-13
87	-6.14231	+	NA	0.0705398	+	NA	-1.76808	NA	0.0949037	NA	6	-1557.4	3126.8	53.5848	5.95e-13
200	-5.7549	+	-1.07282	0.205032	+	NA	NA	NA	-0.0640985	0.00382677	7	-1556.92	3127.84	54.624	3.54e-13
6	-5.89028	+	-1.05148	NA	+	NA	NA	NA	NA	NA	4	-1561.03	3130.06	56.8369	1.17e-13
133	-6.13834	+	NA	NA	+	NA	NA	NA	NA	0.00349312	4	-1561.68	3131.37	58.1528	6.06e-14
70	-6.28244	+	-1.03534	NA	+	NA	NA	NA	0.0754745	NA	5	-1560.73	3131.47	58.2522	5.77e-14
8	-5.85663	+	-1.05263	-0.0929311	+	NA	NA	NA	NA	NA	5	-1561.02	3132.05	58.8308	4.32e-14
197	-5.95669	+	NA	NA	+	NA	NA	NA	-0.0369735	0.00371207	5	-1561.62	3133.25	60.0339	2.37e-14
135	-6.24363	+	NA	0.289269	+	NA	NA	NA	NA	0.00353346	5	-1561.64	3133.29	60.0727	2.32e-14
72	-6.23752	+	-1.03681	-0.130536	+	NA	NA	NA	0.0759186	NA	6	-1560.73	3133.46	60.2386	2.14e-14
199	-6.05825	+	NA	0.329217	+	NA	NA	NA	-0.0407003	0.00377909	6	-1561.57	3135.15	61.9311	9.17e-15
5	-6.02492	+	NA	NA	+	NA	NA	NA	NA	NA	3	-1565.51	3137.03	63.8076	3.59e-15
69	-6.52016	+	NA	NA	+	NA	NA	NA	0.0964502	NA	4	-1565.06	3138.12	64.8974	2.08e-15
7	-6.04086	+	NA	0.044373	+	NA	NA	NA	NA	NA	4	-1565.51	3139.03	65.8073	1.32e-15
71	-6.51722	+	NA	-0.00872569	+	NA	NA	NA	0.0964842	NA	5	-1565.06	3140.12	66.899	7.65e-16
10	-8.77946	+	-0.80481	NA	NA	0.907927	NA	NA	NA	NA	4	-1643.75	3295.5	222.285	1.39e-49
26	-8.71085	+	-0.798468	NA	NA	0.909546	-0.311472	NA	NA	NA	5	-1643.49	3296.98	223.761	6.63e-50
12	-8.96682	+	-0.795427	0.402944	NA	0.917962	NA	NA	NA	NA	5	-1643.59	3297.18	223.956	6.01e-50
42	-8.33049	+	-0.811332	NA	NA	0.859486	NA	+	NA	NA	5	-1643.67	3297.34	224.126	5.52e-50
138	-8.82955	+	-0.805648	NA	NA	0.921059	NA	NA	NA	-0.000182027	5	-1643.73	3297.46	224.246	5.2e-50
74	-8.77799	+	-0.804961	NA	NA	0.908017	NA	NA	-0.000359399	NA	5	-1643.75	3297.51	224.287	5.1e-50
28	-8.9032	+	-0.788755	0.416974	NA	0.919934	-0.317343	NA	NA	NA	6	-1643.31	3298.63	225.413	2.9e-50
58	-8.28324	+	-0.804653	NA	NA	0.86328	-0.306904	+	NA	NA	6	-1643.42	3298.84	225.619	2.62e-50
44	-8.37002	+	-0.802597	0.498737	NA	0.851136	NA	+	NA	NA	6	-1643.43	3298.87	225.652	2.58e-50
154	-8.7627	+	-0.799314	NA	NA	0.923208	-0.31234	NA	NA	-0.000189499	6	-1643.47	3298.94	225.719	2.49e-50
9	-8.93704	+	NA	NA	NA	0.919433	NA	NA	NA	NA	3	-1646.48	3298.96	225.737	2.47e-50
90	-8.70812	+	-0.798727	NA	NA	0.90971	-0.311491	NA	-0.000662779	NA	6	-1643.49	3298.98	225.763	2.44e-50
140	-9.00736	+	-0.796315	0.396892	NA	0.929168	NA	NA	NA	-0.000157237	6	-1643.57	3299.15	225.928	2.24e-50
76	-8.95887	+	-0.796228	0.404004	NA	0.918512	NA	NA	-0.00207239	NA	6	-1643.58	3299.18	225.957	2.21e-50
170	-8.37107	+	-0.812508	NA	NA	0.872603	NA	+	NA	-0.000205982	6	-1643.64	3299.29	226.076	2.08e-50
106	-8.31944	+	-0.812209	NA	NA	0.859757	NA	+	-0.00211474	NA	6	-1643.67	3299.35	226.127	2.03e-50
202	-8.87596	+	-0.802776	NA	NA	0.92291	NA	NA	0.00780414	-0.000234776	6	-1643.72	3299.46	226.237	1.92e-50
25	-8.86106	+	NA	NA	NA	0.921117	-0.339025	NA	NA	NA	4	-1646.17	3300.33	227.116	1.24e-50
60	-8.32275	+	-0.795696	0.510062	NA	0.854789	-0.311996	+	NA	NA	7	-1643.17	3300.35	227.128	1.23e-50
11	-9.16823	+	NA	0.505286	NA	0.931661	NA	NA	NA	NA	4	-1646.23	3300.47	227.251	1.16e-50
156	-8.94519	+	-0.789646	0.41071	NA	0.931602	-0.318009	NA	NA	-0.000163937	7	-1643.3	3300.6	227.383	1.08e-50
92	-8.89371	+	-0.789709	0.418243	NA	0.92058	-0.317472	NA	-0.00245758	NA	7	-1643.31	3300.63	227.414	1.07e-50
186	-8.32472	+	-0.805867	NA	NA	0.876792	-0.307707	+	NA	-0.000212531	7	-1643.39	3300.78	227.566	9.89e-51
172	-8.40623	+	-0.803735	0.493534	NA	0.863	NA	+	NA	-0.000184635	7	-1643.41	3300.83	227.612	9.66e-51
122	-8.27104	+	-0.805612	NA	NA	0.863578	-0.306972	+	-0.00233093	NA	7	-1643.41	3300.84	227.62	9.63e-51
108	-8.34429	+	-0.804602	0.502455	NA	0.851734	NA	+	-0.00501075	NA	7	-1643.43	3300.87	227.648	9.49e-51
41	-8.61192	+	NA	NA	NA	0.884327	NA	+	NA	NA	4	-1646.44	3300.88	227.659	9.44e-51
73	-8.98574	+	NA	NA	NA	0.916191	NA	NA	0.0123321	NA	4	-1646.46	3300.92	227.704	9.23e-51
137	-8.98115	+	NA	NA	NA	0.930972	NA	NA	NA	-0.0001602	4	-1646.46	3300.93	227.709	9.21e-51
218	-8.80854	+	-0.796508	NA	NA	0.925024	-0.312237	NA	0.00771194	-0.000241544	7	-1643.46	3300.93	227.711	9.2e-51
204	-9.03263	+	-0.794712	0.393467	NA	0.930152	NA	NA	0.00452072	-0.000187826	7	-1643.57	3301.15	227.927	8.26e-51
234	-8.41389	+	-0.810057	NA	NA	0.874571	NA	+	0.00654134	-0.000250048	7	-1643.64	3301.29	228.07	7.68e-51
27	-9.09706	+	NA	0.519455	NA	0.933684	-0.345135	NA	NA	NA	5	-1645.91	3301.83	228.607	5.88e-51
43	-8.65502	+	NA	0.58829	NA	0.874136	NA	+	NA	NA	5	-1646.13	3302.26	229.04	4.73e-51
57	-8.55647	+	NA	NA	NA	0.888154	-0.336358	+	NA	NA	5	-1646.13	3302.27	229.048	4.71e-51
153	-8.90721	+	NA	NA	NA	0.933249	-0.339782	NA	NA	-0.000168554	5	-1646.15	3302.3	229.085	4.63e-51
89	-8.90815	+	NA	NA	NA	0.918004	-0.338263	NA	0.011866	NA	5	-1646.15	3302.3	229.086	4.63e-51
188	-8.35986	+	-0.796831	0.504763	NA	0.867032	-0.312653	+	NA	-0.000190857	8	-1643.15	3302.31	229.086	4.62e-51
124	-8.29545	+	-0.797796	0.51402	NA	0.855425	-0.312205	+	-0.00531337	NA	8	-1643.17	3302.34	229.124	4.54e-51
75	-9.20469	+	NA	0.499165	NA	0.928861	NA	NA	0.00998301	NA	5	-1646.22	3302.45	229.23	4.3e-51
139	-9.20168	+	NA	0.500526	NA	0.940859	NA	NA	NA	-0.00012906	5	-1646.22	3302.45	229.234	4.3e-51
220	-8.96937	+	-0.788154	0.407348	NA	0.932554	-0.317927	NA	0.00431889	-0.000193591	8	-1643.29	3302.6	229.382	3.99e-51
250	-8.36761	+	-0.803425	NA	NA	0.878767	-0.307668	+	0.00653138	-0.000256374	8	-1643.38	3302.78	229.561	3.65e-51
236	-8.41841	+	-0.803066	0.491771	NA	0.863599	NA	+	0.00191323	-0.000197729	8	-1643.41	3302.83	229.615	3.55e-51
201	-9.11611	+	NA	NA	NA	0.936197	NA	NA	0.0232032	-0.000317094	5	-1646.42	3302.84	229.618	3.55e-51
169	-8.64673	+	NA	NA	NA	0.895625	NA	+	NA	-0.000177898	5	-1646.42	3302.84	229.625	3.53e-51
105	-8.66858	+	NA	NA	NA	0.882744	NA	+	0.0111772	NA	5	-1646.42	3302.85	229.633	3.52e-51
59	-8.59949	+	NA	0.599898	NA	0.877806	-0.341384	+	NA	NA	6	-1645.81	3303.63	230.411	2.38e-51
155	-9.13231	+	NA	0.514426	NA	0.94342	-0.345695	NA	NA	-0.000136683	6	-1645.9	3303.81	230.588	2.18e-51
91	-9.13168	+	NA	0.513662	NA	0.931035	-0.34445	NA	0.0094308	NA	6	-1645.9	3303.81	230.59	2.18e-51
217	-9.04085	+	NA	NA	NA	0.938411	-0.338976	NA	0.0229439	-0.000323663	6	-1646.1	3304.22	230.997	1.78e-51
185	-8.59278	+	NA	NA	NA	0.899927	-0.337061	+	NA	-0.000185241	6	-1646.11	3304.23	231.012	1.77e-51
171	-8.68506	+	NA	0.584253	NA	0.88395	NA	+	NA	-0.000152893	6	-1646.11	3304.23	231.016	1.76e-51
121	-8.61131	+	NA	NA	NA	0.886623	-0.33578	+	0.0107922	NA	6	-1646.12	3304.24	231.025	1.75e-51
107	-8.69282	+	NA	0.581989	NA	0.87313	NA	+	0.00760143	NA	6	-1646.12	3304.25	231.029	1.75e-51
252	-8.37123	+	-0.796248	0.503041	NA	0.867591	-0.312658	+	0.00178266	-0.000202848	9	-1643.15	3304.31	231.089	1.7e-51
203	-9.30413	+	NA	0.484202	NA	0.944726	NA	NA	0.0189168	-0.000257765	6	-1646.19	3304.39	231.175	1.63e-51
233	-8.79052	+	NA	NA	NA	0.902098	NA	+	0.0223765	-0.000328508	6	-1646.38	3304.76	231.541	1.36e-51
187	-8.63071	+	NA	0.595582	NA	0.888063	-0.341947	+	NA	-0.000159841	7	-1645.8	3305.6	232.385	8.89e-52
123	-8.63491	+	NA	0.59397	NA	0.876857	-0.340933	+	0.00711881	NA	7	-1645.81	3305.62	232.402	8.81e-52
219	-9.23277	+	NA	0.498433	NA	0.947199	-0.344841	NA	0.0185126	-0.000262535	7	-1645.87	3305.75	232.533	8.25e-52
249	-8.73502	+	NA	NA	NA	0.906301	-0.336401	+	0.0221741	-0.000334453	7	-1646.07	3306.15	232.93	6.77e-52
235	-8.79108	+	NA	0.567212	NA	0.889051	NA	+	0.0168068	-0.000266638	7	-1646.09	3306.19	232.97	6.63e-52
251	-8.73466	+	NA	0.578942	NA	0.893046	-0.341317	+	0.016468	-0.00027126	8	-1645.77	3307.56	234.342	3.34e-52
34	-2.25517	+	-0.793645	NA	NA	NA	NA	+	NA	NA	4	-1654.49	3316.98	243.759	3.01e-54
162	-2.57705	+	-0.790302	NA	NA	NA	NA	+	NA	0.00128239	5	-1653.8	3317.61	244.394	2.19e-54
36	-2.4485	+	-0.781791	0.980776	NA	NA	NA	+	NA	NA	5	-1653.87	3317.74	244.522	2.06e-54
164	-2.77073	+	-0.77822	0.971156	NA	NA	NA	+	NA	0.00129141	6	-1653.18	3318.36	245.141	1.51e-54
50	-2.17867	+	-0.786322	NA	NA	NA	-0.317518	+	NA	NA	5	-1654.21	3318.43	245.215	1.45e-54
98	-2.36901	+	-0.788612	NA	NA	NA	NA	+	0.0187079	NA	5	-1654.46	3318.93	245.707	1.14e-54
178	-2.50167	+	-0.783104	NA	NA	NA	-0.313662	+	NA	0.00128327	6	-1653.54	3319.08	245.864	1.05e-54
52	-2.37312	+	-0.77431	0.994622	NA	NA	-0.324024	+	NA	NA	6	-1653.58	3319.17	245.956	1e-54
226	-2.43972	+	-0.798321	NA	NA	NA	NA	+	-0.0303429	0.00147112	6	-1653.75	3319.5	246.28	8.54e-55
100	-2.52056	+	-0.778655	0.970277	NA	NA	NA	+	0.0121901	NA	6	-1653.86	3319.72	246.502	7.64e-55
180	-2.69635	+	-0.770807	0.984796	NA	NA	-0.320241	+	NA	0.00129236	7	-1652.9	3319.81	246.588	7.32e-55
228	-2.59886	+	-0.78821	1.00325	NA	NA	NA	+	-0.0394509	0.00153726	7	-1653.08	3320.17	246.949	6.11e-55
33	-2.36162	+	NA	NA	NA	NA	NA	+	NA	NA	3	-1657.1	3320.2	246.979	6.02e-55
114	-2.2919	+	-0.781378	NA	NA	NA	-0.317171	+	0.0186003	NA	6	-1654.19	3320.38	247.164	5.49e-55
35	-2.57331	+	NA	1.08185	NA	NA	NA	+	NA	NA	4	-1656.39	3320.78	247.562	4.5e-55
161	-2.69943	+	NA	NA	NA	NA	NA	+	NA	0.00134988	4	-1656.39	3320.79	247.569	4.48e-55
242	-2.36388	+	-0.791061	NA	NA	NA	-0.313594	+	-0.0304569	0.00147274	7	-1653.48	3320.97	247.75	4.1e-55
116	-2.44388	+	-0.771256	0.984254	NA	NA	-0.323708	+	0.0119609	NA	7	-1653.57	3321.15	247.936	3.73e-55
163	-2.91111	+	NA	1.07048	NA	NA	NA	+	NA	0.00135883	5	-1655.67	3321.35	248.132	3.38e-55
49	-2.27648	+	NA	NA	NA	NA	-0.347242	+	NA	NA	4	-1656.77	3321.55	248.326	3.07e-55
244	-2.52327	+	-0.780708	1.01737	NA	NA	-0.320464	+	-0.0397192	0.00153987	8	-1652.8	3321.61	248.395	2.97e-55
97	-2.55516	+	NA	NA	NA	NA	NA	+	0.0320223	NA	4	-1657.02	3322.05	248.831	2.38e-55
51	-2.48943	+	NA	1.0958	NA	NA	-0.353161	+	NA	NA	5	-1656.05	3322.11	248.887	2.32e-55
177	-2.61525	+	NA	NA	NA	NA	-0.343148	+	NA	0.00134981	5	-1656.07	3322.15	248.932	2.27e-55
179	-2.82822	+	NA	1.08429	NA	NA	-0.349135	+	NA	0.00135899	6	-1655.34	3322.69	249.472	1.73e-55
99	-2.71756	+	NA	1.05905	NA	NA	NA	+	0.0246117	NA	5	-1656.34	3322.69	249.476	1.73e-55
225	-2.62816	+	NA	NA	NA	NA	NA	+	-0.0158844	0.00144952	5	-1656.38	3322.76	249.54	1.67e-55
227	-2.79851	+	NA	1.09339	NA	NA	NA	+	-0.0261289	0.00152213	6	-1655.63	3323.27	250.053	1.29e-55
113	-2.46856	+	NA	NA	NA	NA	-0.346108	+	0.0317319	NA	5	-1656.7	3323.4	250.183	1.21e-55
115	-2.63143	+	NA	1.07332	NA	NA	-0.352166	+	0.0241904	NA	6	-1656.01	3324.02	250.805	8.89e-56
241	-2.54262	+	NA	NA	NA	NA	-0.343379	+	-0.0162047	0.00145116	6	-1656.06	3324.12	250.903	8.47e-56
243	-2.71347	+	NA	1.10767	NA	NA	-0.349727	+	-0.0266066	0.0015253	7	-1655.3	3324.61	251.392	6.63e-56
130	-5.13669	+	-0.713174	NA	NA	NA	NA	NA	NA	0.00329798	4	-1662.26	3332.53	259.308	1.27e-57
146	-5.04861	+	-0.705949	NA	NA	NA	-0.359623	NA	NA	0.00329813	5	-1661.91	3333.83	260.608	6.61e-58
194	-4.89713	+	-0.723531	NA	NA	NA	NA	NA	-0.048247	0.00358122	5	-1662.15	3334.3	261.083	5.21e-58
132	-5.20238	+	-0.71059	0.179405	NA	NA	NA	NA	NA	0.00332331	5	-1662.24	3334.49	261.276	4.73e-58
129	-5.22815	+	NA	NA	NA	NA	NA	NA	NA	0.00334558	3	-1664.33	3334.66	261.438	4.37e-58
210	-4.80821	+	-0.716254	NA	NA	NA	-0.359602	NA	-0.0484195	0.00358224	6	-1661.8	3335.6	262.383	2.72e-58
148	-5.11924	+	-0.703158	0.194037	NA	NA	-0.361088	NA	NA	0.00332539	6	-1661.89	3335.79	262.569	2.48e-58
145	-5.1335	+	NA	NA	NA	NA	-0.382088	NA	NA	0.00334513	4	-1663.93	3335.86	262.645	2.39e-58
196	-4.96783	+	-0.720749	0.226269	NA	NA	NA	NA	-0.0507039	0.00362752	6	-1662.12	3336.25	263.03	1.97e-58
193	-5.05623	+	NA	NA	NA	NA	NA	NA	-0.0349926	0.00355215	4	-1664.27	3336.54	263.324	1.7e-58
131	-5.32637	+	NA	0.270396	NA	NA	NA	NA	NA	0.00338311	4	-1664.29	3336.58	263.363	1.67e-58
212	-4.88309	+	-0.713274	0.241326	NA	NA	-0.361462	NA	-0.0510351	0.00363144	7	-1661.77	3337.54	264.323	1.03e-58
209	-4.95961	+	NA	NA	NA	NA	-0.382473	NA	-0.035368	0.00355379	5	-1663.87	3337.75	264.53	9.3e-59
147	-5.23642	+	NA	0.2848	NA	NA	-0.383925	NA	NA	0.00338468	5	-1663.89	3337.78	264.563	9.15e-59
2	-5.03101	+	-0.707075	NA	NA	NA	NA	NA	NA	NA	3	-1666.06	3338.12	264.905	7.71e-59
195	-5.15124	+	NA	0.307674	NA	NA	NA	NA	-0.0384062	0.00361494	5	-1664.22	3338.45	265.228	6.56e-59
18	-4.93858	+	-0.699562	NA	NA	NA	-0.374772	NA	NA	NA	4	-1665.68	3339.36	266.143	4.15e-59
66	-5.45237	+	-0.692609	NA	NA	NA	NA	NA	0.081411	NA	4	-1665.7	3339.41	266.189	4.06e-59
211	-5.05861	+	NA	0.322644	NA	NA	-0.38462	NA	-0.0389591	0.00361983	6	-1663.82	3339.64	266.426	3.6e-59
4	-5.01169	+	-0.707767	-0.0536037	NA	NA	NA	NA	NA	NA	4	-1666.06	3340.12	266.903	2.84e-59
1	-5.11948	+	NA	NA	NA	NA	NA	NA	NA	NA	2	-1668.08	3340.17	266.949	2.77e-59
82	-5.35947	+	-0.685309	NA	NA	NA	-0.372622	NA	0.0812067	NA	5	-1665.32	3340.65	267.435	2.18e-59
65	-5.59618	+	NA	NA	NA	NA	NA	NA	0.0928692	NA	3	-1667.63	3341.26	268.046	1.6e-59
17	-5.0205	+	NA	NA	NA	NA	-0.396824	NA	NA	NA	3	-1667.66	3341.31	268.093	1.57e-59
20	-4.92469	+	-0.700072	-0.0387071	NA	NA	-0.374503	NA	NA	NA	5	-1665.68	3341.36	268.143	1.53e-59
68	-5.42003	+	-0.693745	-0.0941018	NA	NA	NA	NA	0.081721	NA	5	-1665.7	3341.4	268.182	1.5e-59
3	-5.13161	+	NA	0.0338893	NA	NA	NA	NA	NA	NA	3	-1668.08	3342.17	268.949	1.02e-59
81	-5.49622	+	NA	NA	NA	NA	-0.39357	NA	0.0924874	NA	4	-1667.21	3342.42	269.204	8.98e-60
84	-5.33239	+	-0.686268	-0.0792686	NA	NA	-0.372062	NA	0.0814707	NA	6	-1665.32	3342.65	269.431	8.02e-60
67	-5.59081	+	NA	-0.0158181	NA	NA	NA	NA	0.0929252	NA	4	-1667.63	3343.27	270.047	5.9e-60
19	-5.03777	+	NA	0.0484648	NA	NA	-0.397104	NA	NA	NA	4	-1667.65	3343.31	270.093	5.76e-60
83	-5.4958	+	NA	-0.00119569	NA	NA	-0.39355	NA	0.0924931	NA	5	-1667.21	3344.42	271.206	3.3e-60

## Sheet: Baboons
	cond((Int))	disp((Int))	cond(All_Livestock_1)	cond(Dist_Road_K)	cond(Fencing_2)	cond(Height_meters)	cond(ndvi)	cond(Underpass_type)	cond(Water_source)	cond(Width_meters)	df	logLik	AICc	delta	weight
32	-7.11589	+	-0.255813	-2.89909	1.4639	0.754978	-3.13944	NA	NA	NA	7	-1665.41	3344.83	0	0.170498		Family: binomial ( logit )
31	-7.12976	+	NA	-2.84689	+	0.753262	-3.1465	NA	NA	NA	6	-1666.65	3345.31	0.476088	0.134381		Formula:
96	-6.78937	+	-0.267569	-3.13134	+	0.782738	-3.14258	NA	-0.0812468	NA	8	-1664.73	3345.46	0.632817	0.124253		Baboons ~ ndvi + Dist_Road_K + Fencing_2 + Water_source + Underpass_type +
95	-6.8415	+	NA	-3.05686	+	0.778891	-3.14956	NA	-0.0729908	NA	7	-1666.08	3346.17	1.34116	0.0871948		All_Livestock_1 + Width_meters + Height_meters + (1 | Unique_ID)
160	-7.1683	+	-0.256191	-2.92282	+	0.769797	-3.14039	NA	NA	-0.000199675	8	-1665.39	3346.79	1.95998	0.0639907		Data: nomitdata
64	-6.95277	+	-0.256571	-2.85733	+	0.736028	-3.13741	+	NA	NA	8	-1665.4	3346.81	1.98187	0.0632939
159	-7.17704	+	NA	-2.86836	+	0.76662	-3.1474	NA	NA	-0.000179183	7	-1666.63	3347.27	2.44307	0.050259		AIC BIC logLik deviance df.resid
63	-7.02799	+	NA	-2.82065	+	0.741434	-3.14523	+	NA	NA	7	-1666.65	3347.3	2.47008	0.0495849		3349.3 3423.1 -1664.6 3329.3 11900
224	-6.62207	+	-0.268854	-3.12081	+	0.756152	-3.14111	NA	-0.0953604	0.000423989	9	-1664.65	3347.32	2.48476	0.0492222
128	-6.56584	+	-0.268684	-3.06957	+	0.756931	-3.13987	+	-0.0816951	NA	9	-1664.71	3347.43	2.59757	0.0465227		Random effects:
223	-6.69177	+	NA	-3.04752	+	0.755049	-3.14818	NA	-0.0856371	0.000380089	8	-1666.02	3348.05	3.21898	0.034098
127	-6.68876	+	NA	-3.01491	+	0.761262	-3.14766	+	-0.0732973	NA	8	-1666.07	3348.16	3.32544	0.0323303		Conditional model:
192	-6.99645	+	-0.257016	-2.8788	+	0.750091	-3.1383	+	NA	-0.000205444	9	-1665.38	3348.77	3.93968	0.0237809		Groups Name Variance Std.Dev.
191	-7.06762	+	NA	-2.84011	+	0.754052	-3.14604	+	NA	-0.000182773	8	-1666.63	3349.27	4.43596	0.0185551		Unique_ID (Intercept) 2.728 1.652
256	-6.41113	+	-0.269905	-3.06182	+	0.731868	-3.13853	+	-0.0956092	0.000418961	10	-1664.63	3349.28	4.45316	0.0183962		Number of obs: 11910, groups: Unique_ID, 72
255	-6.54967	+	NA	-3.00773	+	0.738691	-3.14642	+	-0.0858185	0.000377434	9	-1666.01	3350.04	5.20573	0.0126273
30	-8.18638	+	-0.248598	NA	+	0.795229	-3.18361	NA	NA	NA	6	-1670.34	3352.69	7.8609	0.00334771		Conditional model:
29	-8.17409	+	NA	NA	+	0.791948	-3.19096	NA	NA	NA	5	-1671.5	3353.01	8.18177	0.00285149			Estimate	Std. Error	z value	Pr(>|z|)
94	-7.96018	+	-0.257696	NA	+	0.817224	-3.18636	NA	-0.0669462	NA	7	-1669.9	3353.82	8.98775	0.0019057		(Intercept)	-6.41113	1.43399	-4.471	7.79e-06	***
62	-7.0504	+	-0.253258	NA	+	0.671319	-3.16907	+	NA	NA	7	-1669.93	3353.86	9.02922	0.00186659		ndvi	-3.13853	0.608625	-5.157	2.51e-07	***
61	-7.11869	+	NA	NA	+	0.676822	-3.17715	+	NA	NA	6	-1671.13	3354.27	9.43943	0.00152046		Dist_Road_K	-3.06182	1.17917	-2.597	0.009415	**
93	-7.97837	+	NA	NA	+	0.811891	-3.19355	NA	-0.0591347	NA	6	-1671.15	3354.31	9.47937	0.0014904		Fencing_2Y	1.46484	0.108748	13.47	< 2e-16	***
158	-8.18407	+	-0.248583	NA	+	0.794649	-3.18357	NA	NA	7.91e-06	7	-1670.34	3354.69	9.86319	0.00123014		Water_source	-0.095609	0.079742	-1.199	0.230538
126	-6.70479	+	-0.263505	NA	+	0.683662	-3.17087	+	-0.0717894	NA	8	-1669.42	3354.84	10.0136	0.001141		Underpass_typeCulvert	-0.146755	0.784558	-0.187	0.851618
157	-8.16655	+	NA	NA	+	0.790049	-3.19085	NA	NA	2.55e-05	6	-1671.5	3355.01	10.1831	0.00104828		All_Livestock_1	-0.269905	0.164155	-1.644	0.100134
125	-6.81913	+	NA	NA	+	0.688532	-3.17898	+	-0.0635579	NA	7	-1670.72	3355.45	10.6205	0.0008424		Width_meters	0.000419	0.001088	0.385	0.700191
222	-7.72373	+	-0.259279	NA	+	0.780003	-3.18443	NA	-0.0858509	0.00058431	8	-1669.78	3355.57	10.7349	0.000795557		Height_meters	0.731868	0.196587	3.723	0.000197	***
190	-7.06068	+	-0.253359	NA	+	0.67454	-3.16925	+	NA	-4.95e-05	8	-1669.92	3355.86	11.0296	0.000686561		---
221	-7.76058	+	NA	NA	+	0.77758	-3.1917	NA	-0.0765903	0.000539308	7	-1671.04	3356.09	11.2574	0.000612631		Signif. codes: 0 ‘***’ 0.001 ‘**’ 0.01 ‘*’ 0.05 ‘.’ 0.1 ‘ ’ 1
189	-7.12453	+	NA	NA	+	0.678618	-3.17726	+	NA	-2.74e-05	7	-1671.13	3356.27	11.441	0.000558896
254	-6.50592	+	-0.264935	NA	+	0.651181	-3.16925	+	-0.0894084	0.000547823	9	-1669.3	3356.62	11.7887	0.000469728
253	-6.63606	+	NA	NA	+	0.658605	-3.17738	+	-0.0798109	0.000505007	8	-1670.62	3357.25	12.424	0.000341894
56	-1.84669	+	-0.28459	-2.38547	+	NA	-3.0674	+	NA	NA	7	-1673.41	3360.82	15.9928	5.74e-05		Family: binomial ( logit )
248	-1.52132	+	-0.294363	-2.45102	+	NA	-3.07059	+	-0.129728	0.00187989	9	-1671.71	3361.44	16.6093	4.22e-05		Formula: Baboons ~ ndvi + Dist_Road_K + Fencing_2 + All_Livestock_1 +
184	-2.12279	+	-0.281002	-2.34204	+	NA	-3.06819	+	NA	0.0010733	8	-1672.88	3361.78	16.9485	3.56e-05		Height_meters + (1 | Unique_ID)
55	-1.88785	+	NA	-2.34211	+	NA	-3.07644	+	NA	NA	6	-1674.95	3361.91	17.0757	3.34e-05		Data: nomitdata
120	-1.41563	+	-0.292756	-2.45282	+	NA	-3.06841	+	-0.0694026	NA	8	-1673	3362.02	17.1904	3.15e-05
247	-1.61491	+	NA	-2.39969	+	NA	-3.07952	+	-0.120411	0.00185575	8	-1673.36	3362.74	17.9057	2.21e-05		AIC BIC logLik deviance df.resid
183	-2.17199	+	NA	-2.2966	+	NA	-3.07689	+	NA	0.0011052	7	-1674.39	3362.78	17.9505	2.16e-05		3344.8 3396.5 -1665.4 3330.8 11903
119	-1.50978	+	NA	-2.40246	+	NA	-3.07761	+	-0.0609503	NA	7	-1674.63	3363.28	18.4485	1.68e-05
54	-2.30965	+	-0.278204	NA	+	NA	-3.09876	+	NA	NA	6	-1676.27	3364.55	19.7206	8.9e-06		Random effects:
246	-2.01654	+	-0.287243	NA	+	NA	-3.10311	+	-0.126737	0.00188597	8	-1674.66	3365.33	20.4987	6.03e-06
53	-2.34168	+	NA	NA	+	NA	-3.10721	+	NA	NA	5	-1677.74	3365.48	20.6537	5.58e-06		Conditional model:
182	-2.58273	+	-0.274547	NA	+	NA	-3.10014	+	NA	0.00109609	7	-1675.75	3365.5	20.6738	5.53e-06		Groups Name Variance Std.Dev.
118	-1.90435	+	-0.285956	NA	+	NA	-3.09979	+	-0.0673443	NA	7	-1675.91	3365.82	20.9886	4.72e-06		Unique_ID (Intercept) 2.744 1.656
181	-2.62213	+	NA	NA	+	NA	-3.10832	+	NA	0.00112687	6	-1677.18	3366.36	21.5265	3.61e-06		Number of obs: 11910, groups: Unique_ID, 72
245	-2.09882	+	NA	NA	+	NA	-3.11137	+	-0.117526	0.00186025	7	-1676.22	3366.45	21.623	3.44e-06
117	-1.98742	+	NA	NA	+	NA	-3.10838	+	-0.0589711	NA	6	-1677.45	3366.91	22.0833	2.73e-06		Conditional model:
216	-3.14927	+	-0.289079	-3.35791	+	NA	-3.07946	NA	-0.148916	0.00351051	8	-1677.79	3371.59	26.7574	2.64e-07			Estimate	Std. Error	z value	Pr(>|z|)
152	-3.87517	+	-0.276597	-3.23365	+	NA	-3.07727	NA	NA	0.00261302	7	-1679.05	3372.12	27.2846	2.03e-07		(Intercept)	-7.1159	0.7532	-9.447	< 2e-16	***
215	-3.22349	+	NA	-3.29554	+	NA	-3.08926	NA	-0.139509	0.00346768	7	-1679.38	3372.76	27.9309	1.47e-07		ndvi	-3.1394	0.6084	-5.16	2.47e-07	***
151	-3.90092	+	NA	-3.17685	+	NA	-3.08681	NA	NA	0.00262427	6	-1680.51	3373.02	28.1867	1.29e-07		Dist_Road_K	-2.8991	1.0452	-2.774	0.00554	**
16	-7.75737	+	-0.262951	-3.06586	+	0.74737	NA	NA	NA	NA	6	-1680.84	3373.7	28.8645	9.2e-08		Fencing_2Y	1.4639	0.1087	13.462	< 2e-16	***
15	-7.77173	+	NA	-3.00846	+	0.745185	NA	NA	NA	NA	5	-1682.16	3374.32	29.4924	6.72e-08		All_Livestock_1	-0.2558	0.164	-1.56	0.11882
80	-7.4325	+	-0.274244	-3.30252	+	0.775101	NA	NA	-0.0808731	NA	7	-1680.19	3374.38	29.5523	6.52e-08		Height_meters	0.755	0.1299	5.814	6.12e-09	***
79	-7.4865	+	NA	-3.22142	+	0.770642	NA	NA	-0.0722595	NA	6	-1681.62	3375.24	30.4108	4.25e-08		---
48	-7.43815	+	-0.264345	-2.98335	+	0.710335	NA	+	NA	NA	7	-1680.81	3375.62	30.7903	3.51e-08		Signif. codes: 0 ‘***’ 0.001 ‘**’ 0.01 ‘*’ 0.05 ‘.’ 0.1 ‘ ’ 1
144	-7.7984	+	-0.263257	-3.0845	+	0.758913	NA	NA	NA	-0.000155013	7	-1680.83	3375.67	30.8419	3.42e-08
24	-3.67866	+	-0.283364	-3.63029	+	NA	-3.07717	NA	NA	NA	6	-1681.86	3375.73	30.9022	3.32e-08
208	-7.24346	+	-0.275587	-3.29083	+	0.745126	NA	NA	-0.0967266	0.000477266	8	-1680.09	3376.2	31.3694	2.63e-08
47	-7.51772	+	NA	-2.94227	+	0.715698	NA	+	NA	NA	6	-1682.13	3376.27	31.4442	2.53e-08
112	-7.05214	+	-0.276047	-3.19633	+	0.731184	NA	+	-0.0815572	NA	8	-1680.13	3376.28	31.4485	2.53e-08
143	-7.80714	+	NA	-3.02467	+	0.755128	NA	NA	NA	-0.000133121	6	-1682.15	3376.31	31.4754	2.49e-08
23	-3.70448	+	NA	-3.57759	+	NA	-3.08756	NA	NA	NA	5	-1683.39	3376.78	31.9526	1.96e-08
207	-7.31548	+	NA	-3.21056	+	0.743485	NA	NA	-0.0866284	0.000432707	7	-1681.54	3377.09	32.2559	1.69e-08
111	-7.18116	+	NA	-3.13633	+	0.735391	NA	+	-0.0728009	NA	7	-1681.58	3377.17	32.342	1.62e-08
176	-7.47387	+	-0.264707	-3.00085	+	0.721716	NA	+	NA	-0.000165725	8	-1680.79	3377.6	32.7644	1.31e-08
88	-3.53727	+	-0.285659	-3.67013	+	NA	-3.07755	NA	-0.0266275	NA	7	-1681.82	3377.65	32.8143	1.28e-08
240	-6.87883	+	-0.277317	-3.18757	+	0.703124	NA	+	-0.0970896	0.000468868	9	-1680.04	3378.1	33.2718	1.02e-08
175	-7.54823	+	NA	-2.95734	+	0.72542	NA	+	NA	-0.000141523	7	-1682.12	3378.26	33.425	9.41e-09
87	-3.60461	+	NA	-3.60636	+	NA	-3.08791	NA	-0.0188686	NA	6	-1683.37	3378.74	33.9086	7.39e-09
214	-4.1943	+	-0.280494	NA	+	NA	-3.1172	NA	-0.150113	0.00386324	7	-1682.47	3378.96	34.1252	6.63e-09
239	-7.02385	+	NA	-3.1282	+	0.709905	NA	+	-0.0869084	0.00042584	8	-1681.51	3379.02	34.1922	6.41e-09
150	-4.89421	+	-0.268609	NA	+	NA	-3.11463	NA	NA	0.00295162	6	-1683.68	3379.37	34.5381	5.39e-09
213	-4.24614	+	NA	NA	+	NA	-3.12652	NA	-0.140726	0.00381185	6	-1683.96	3379.93	35.0963	4.08e-09
149	-4.89921	+	NA	NA	+	NA	-3.12381	NA	NA	0.00295469	5	-1685.04	3380.09	35.2598	3.76e-09
14	-8.92295	+	-0.256477	NA	+	0.793028	NA	NA	NA	NA	5	-1686.2	3382.41	37.5754	1.18e-09
13	-8.90866	+	NA	NA	+	0.789112	NA	NA	NA	NA	4	-1687.44	3382.89	38.0567	9.29e-10
46	-7.56069	+	-0.26154	NA	+	0.644712	NA	+	NA	NA	6	-1685.64	3383.28	38.4479	7.64e-10
78	-8.69785	+	-0.265132	NA	+	0.814951	NA	NA	-0.0667984	NA	6	-1685.79	3383.58	38.7477	6.57e-10
45	-7.63296	+	NA	NA	+	0.650226	NA	+	NA	NA	5	-1686.93	3383.86	39.0309	5.71e-10
22	-4.80662	+	-0.275805	NA	+	NA	-3.11374	NA	NA	NA	5	-1687.02	3384.04	39.2101	5.22e-10
77	-8.71527	+	NA	NA	+	0.808864	NA	NA	-0.058612	NA	5	-1687.11	3384.23	39.3973	4.75e-10
110	-7.2132	+	-0.271423	NA	+	0.657067	NA	+	-0.0722034	NA	7	-1685.14	3384.29	39.461	4.6e-10
142	-8.905	+	-0.256364	NA	+	0.788551	NA	NA	NA	5.97e-05	6	-1686.2	3384.4	39.5741	4.35e-10
141	-8.88499	+	NA	NA	+	0.783219	NA	NA	NA	7.85e-05	5	-1687.44	3384.88	40.0526	3.42e-10
21	-4.81333	+	NA	NA	+	NA	-3.12374	NA	NA	NA	4	-1688.46	3384.92	40.0848	3.37e-10
109	-7.33336	+	NA	NA	+	0.661888	NA	+	-0.0635927	NA	6	-1686.53	3385.07	40.2407	3.12e-10
206	-8.43417	+	-0.266724	NA	+	0.773497	NA	NA	-0.0877183	0.000648899	7	-1685.64	3385.28	40.4501	2.81e-10
174	-7.56236	+	-0.261544	NA	+	0.645179	NA	+	NA	-6.76e-06	7	-1685.64	3385.28	40.4502	2.81e-10
173	-7.62984	+	NA	NA	+	0.649169	NA	+	NA	1.61e-05	6	-1686.93	3385.86	41.0326	2.1e-10
205	-8.47099	+	NA	NA	+	0.770435	NA	NA	-0.0780316	0.000602369	6	-1686.98	3385.96	41.1321	2e-10
86	-4.72198	+	-0.277206	NA	+	NA	-3.11397	NA	-0.0173176	NA	6	-1687	3386.01	41.1769	1.95e-10
238	-6.99329	+	-0.272871	NA	+	0.621168	NA	+	-0.0915914	0.000604683	8	-1685.01	3386.03	41.1968	1.93e-10
237	-7.12964	+	NA	NA	+	0.628606	NA	+	-0.0815835	0.000560931	7	-1686.41	3386.84	42.0065	1.29e-10
85	-4.76582	+	NA	NA	+	NA	-3.12397	NA	-0.00976442	NA	5	-1688.45	3386.91	42.0751	1.25e-10
40	-2.50034	+	-0.292065	-2.50246	+	NA	NA	+	NA	NA	6	-1688.17	3388.34	43.509	6.08e-11
232	-2.1778	+	-0.301483	-2.57368	+	NA	NA	+	-0.128531	0.00186472	8	-1686.49	3389	44.1658	4.38e-11
168	-2.77443	+	-0.288323	-2.45966	+	NA	NA	+	NA	0.00106502	7	-1687.65	3389.3	44.4722	3.76e-11
104	-2.07428	+	-0.300168	-2.57178	+	NA	NA	+	-0.0685375	NA	7	-1687.77	3389.55	44.7218	3.32e-11
39	-2.54651	+	NA	-2.45432	+	NA	NA	+	NA	NA	5	-1689.8	3389.6	44.7738	3.23e-11
231	-2.27856	+	NA	-2.51681	+	NA	NA	+	-0.118815	0.00183871	7	-1688.23	3390.47	45.6427	2.09e-11
167	-2.82888	+	NA	-2.40934	+	NA	NA	+	NA	0.00109811	6	-1689.24	3390.48	45.6495	2.08e-11
103	-2.17572	+	NA	-2.51623	+	NA	NA	+	-0.0597213	NA	6	-1689.49	3391	46.1659	1.61e-11
38	-2.99307	+	-0.28556	NA	+	NA	NA	+	NA	NA	5	-1691.34	3392.68	47.847	6.95e-12
230	-2.70222	+	-0.29422	NA	+	NA	NA	+	-0.126039	0.00187443	7	-1689.75	3393.52	48.6857	4.57e-12
166	-3.26466	+	-0.281793	NA	+	NA	NA	+	NA	0.00108886	6	-1690.82	3393.65	48.8196	4.27e-12
37	-3.02903	+	NA	NA	+	NA	NA	+	NA	NA	4	-1692.89	3393.78	48.9534	4e-12
102	-2.5906	+	-0.293223	NA	+	NA	NA	+	-0.06691	NA	6	-1690.98	3393.96	49.1291	3.66e-12
165	-3.30818	+	NA	NA	+	NA	NA	+	NA	0.00112082	5	-1692.33	3394.67	49.8399	2.57e-12
229	-2.79025	+	NA	NA	+	NA	NA	+	-0.116418	0.0018477	6	-1691.4	3394.81	49.9805	2.39e-12
101	-2.67999	+	NA	NA	+	NA	NA	+	-0.0581467	NA	5	-1692.61	3395.23	50.4002	1.94e-12
200	-3.81295	+	-0.297128	-3.48595	+	NA	NA	NA	-0.14797	0.00350207	7	-1692.64	3399.3	54.4673	2.54e-13
136	-4.53518	+	-0.284845	-3.3559	+	NA	NA	NA	NA	0.00261042	6	-1693.89	3399.8	54.9648	1.98e-13
199	-3.89308	+	NA	-3.41761	+	NA	NA	NA	-0.138119	0.0034562	6	-1694.33	3400.67	55.8386	1.28e-13
135	-4.56454	+	NA	-3.29378	+	NA	NA	NA	NA	0.00262133	5	-1695.44	3400.89	56.0593	1.14e-13
8	-4.33893	+	-0.292093	-3.75174	+	NA	NA	NA	NA	NA	5	-1696.71	3403.42	58.5941	3.22e-14
7	-4.36879	+	NA	-3.69396	+	NA	NA	NA	NA	NA	4	-1698.34	3404.68	59.8539	1.72e-14
72	-4.20241	+	-0.294315	-3.79101	+	NA	NA	NA	-0.0256915	NA	6	-1696.67	3405.34	60.512	1.24e-14
71	-4.27555	+	NA	-3.72142	+	NA	NA	NA	-0.0176035	NA	5	-1698.32	3406.65	61.8153	6.44e-15
198	-4.91127	+	-0.288641	NA	+	NA	NA	NA	-0.150048	0.00388057	6	-1697.69	3407.39	62.5613	4.43e-15
134	-5.61015	+	-0.277021	NA	+	NA	NA	NA	NA	0.00296922	5	-1698.88	3407.77	62.9401	3.67e-15
197	-4.96683	+	NA	NA	+	NA	NA	NA	-0.140221	0.00382546	5	-1699.28	3408.56	63.7244	2.48e-15
133	-5.61682	+	NA	NA	+	NA	NA	NA	NA	0.00297124	4	-1700.34	3408.68	63.8501	2.33e-15
6	-5.52162	+	-0.284676	NA	+	NA	NA	NA	NA	NA	4	-1702.22	3412.44	67.6092	3.55e-16
5	-5.53048	+	NA	NA	+	NA	NA	NA	NA	NA	3	-1703.76	3413.52	68.6887	2.07e-16
70	-5.44075	+	-0.286013	NA	+	NA	NA	NA	-0.016559	NA	5	-1702.2	3414.41	69.5791	1.33e-16
69	-5.48834	+	NA	NA	+	NA	NA	NA	-0.00866794	NA	4	-1703.75	3415.51	70.6812	7.65e-17
27	-6.64768	+	NA	-2.9067	NA	0.729713	-1.05959	NA	NA	NA	5	-1767.63	3545.26	200.429	5.12e-45
91	-6.34801	+	NA	-3.12724	NA	0.755979	-1.06281	NA	-0.0753768	NA	6	-1767.01	3546.04	201.206	3.47e-45
28	-6.65887	+	0.11567	-2.88008	NA	0.729574	-1.08801	NA	NA	NA	6	-1767.35	3546.71	201.883	2.47e-45
155	-6.69834	+	NA	-2.92992	NA	0.744027	-1.06066	NA	NA	-0.000191928	6	-1767.61	3547.22	202.39	1.92e-45
59	-6.43805	+	NA	-2.85218	NA	0.705309	-1.05708	+	NA	NA	6	-1767.61	3547.23	202.395	1.91e-45
11	-6.89929	+	NA	-2.96295	NA	0.728179	NA	NA	NA	NA	4	-1769.62	3547.23	202.403	1.91e-45
92	-6.37141	+	0.106338	-3.09522	NA	0.75512	-1.08892	NA	-0.0725019	NA	7	-1766.78	3547.58	202.745	1.61e-45
219	-6.19628	+	NA	-3.11806	NA	0.731893	-1.06122	NA	-0.0882147	0.000384763	7	-1766.95	3547.91	203.079	1.36e-45
123	-6.0856	+	NA	-3.0539	NA	0.725597	-1.05976	+	-0.0758544	NA	7	-1766.99	3547.98	203.153	1.31e-45
75	-6.60109	+	NA	-3.18555	NA	0.75441	NA	NA	-0.0751327	NA	5	-1769.01	3548.03	203.203	1.28e-45
156	-6.70722	+	0.115353	-2.90213	NA	0.743232	-1.08898	NA	NA	-0.000183255	7	-1767.33	3548.68	203.848	9.26e-46
60	-6.47354	+	0.114908	-2.83201	NA	0.708009	-1.08557	+	NA	NA	7	-1767.34	3548.69	203.858	9.22e-46
12	-6.91325	+	0.0933626	-2.94205	NA	0.727946	NA	NA	NA	NA	5	-1769.44	3548.88	204.047	8.39e-46
43	-6.6323	+	NA	-2.89317	NA	0.69717	NA	+	NA	NA	5	-1769.59	3549.18	204.348	7.21e-46
187	-6.48126	+	NA	-2.87298	NA	0.71903	-1.05803	+	NA	-0.000198621	7	-1767.59	3549.18	204.354	7.19e-46
139	-6.94544	+	NA	-2.98353	NA	0.741116	NA	NA	NA	-0.000173455	5	-1769.6	3549.2	204.372	7.13e-46
220	-6.2253	+	0.105354	-3.08681	NA	0.731966	-1.08717	NA	-0.0848814	0.00037019	8	-1766.72	3549.46	204.627	6.27e-46
124	-6.13321	+	0.105295	-3.02927	NA	0.72759	-1.08586	+	-0.0729685	NA	8	-1766.76	3549.53	204.702	6.04e-46
76	-6.62422	+	0.0840448	-3.16073	NA	0.75361	NA	NA	-0.0728138	NA	6	-1768.87	3549.75	204.915	5.43e-46
251	-5.94605	+	NA	-3.04737	NA	0.703017	-1.05827	+	-0.088468	0.000378943	8	-1766.92	3549.86	205.03	5.13e-46
203	-6.44068	+	NA	-3.17609	NA	0.729021	NA	NA	-0.0886467	0.000405266	6	-1768.94	3549.89	205.064	5.04e-46
107	-6.2813	+	NA	-3.09574	NA	0.717443	NA	+	-0.0756794	NA	6	-1768.97	3549.96	205.125	4.89e-46
188	-6.51447	+	0.114539	-2.85224	NA	0.721082	-1.08645	+	NA	-0.000189674	8	-1767.32	3550.65	205.82	3.46e-46
44	-6.665	+	0.0924277	-2.87735	NA	0.699133	NA	+	NA	NA	6	-1769.41	3550.83	205.999	3.16e-46
140	-6.95742	+	0.0930499	-2.96231	NA	0.74036	NA	NA	NA	-0.00016644	6	-1769.42	3550.85	206.018	3.13e-46
171	-6.67193	+	NA	-2.9126	NA	0.709739	NA	+	NA	-0.000182528	6	-1769.57	3551.14	206.313	2.7e-46
252	-5.99817	+	0.104361	-3.02317	NA	0.705791	-1.08422	+	-0.0851496	0.000365073	9	-1766.7	3551.42	206.587	2.35e-46
204	-6.46817	+	0.0830668	-3.15199	NA	0.728961	NA	NA	-0.0859714	0.000394011	7	-1768.8	3551.61	206.782	2.14e-46
108	-6.32266	+	0.0828215	-3.07669	NA	0.718816	NA	+	-0.0733728	NA	7	-1768.83	3551.68	206.846	2.07e-46
235	-6.13421	+	NA	-3.08873	NA	0.693679	NA	+	-0.0889035	0.000398151	7	-1768.91	3551.82	206.991	1.92e-46
172	-6.70276	+	0.0920642	-2.89617	NA	0.711161	NA	+	NA	-0.000174936	7	-1769.39	3552.8	207.967	1.18e-46
25	-7.7284	+	NA	NA	NA	0.770968	-1.09483	NA	NA	NA	4	-1772.73	3553.47	208.637	8.45e-47
236	-6.17904	+	0.0818916	-3.07017	NA	0.695683	NA	+	-0.0862827	0.000387372	8	-1768.77	3553.55	208.718	8.12e-47
57	-6.53914	+	NA	NA	NA	0.641117	-1.08075	+	NA	NA	5	-1772.26	3554.53	209.698	4.97e-47
89	-7.52382	+	NA	NA	NA	0.79147	-1.09769	NA	-0.0614106	NA	5	-1772.35	3554.71	209.879	4.54e-47
26	-7.72595	+	0.125579	NA	NA	0.76991	-1.12596	NA	NA	NA	5	-1772.41	3554.83	209.997	4.28e-47
153	-7.72401	+	NA	NA	NA	0.769872	-1.09477	NA	NA	1.49e-05	5	-1772.73	3555.47	210.638	3.11e-47
121	-6.22605	+	NA	NA	NA	0.653087	-1.08292	+	-0.066163	NA	6	-1771.81	3555.64	210.805	2.86e-47
9	-8.01654	+	NA	NA	NA	0.771087	NA	NA	NA	NA	3	-1774.85	3555.71	210.878	2.76e-47
58	-6.57331	+	0.121172	NA	NA	0.644096	-1.11103	+	NA	NA	6	-1771.96	3555.93	211.102	2.46e-47
90	-7.53385	+	0.118642	NA	NA	0.789679	-1.12703	NA	-0.0582688	NA	6	-1772.07	3556.14	211.308	2.22e-47
217	-7.30358	+	NA	NA	NA	0.756784	-1.0957	NA	-0.0790501	0.000545235	6	-1772.24	3556.48	211.651	1.87e-47
185	-6.54858	+	NA	NA	NA	0.64401	-1.08094	+	NA	-4.37e-05	6	-1772.26	3556.53	211.698	1.83e-47
41	-6.74349	+	NA	NA	NA	0.632454	NA	+	NA	NA	4	-1774.33	3556.66	211.829	1.71e-47
154	-7.71928	+	0.125615	NA	NA	0.76824	-1.12586	NA	NA	2.23e-05	6	-1772.41	3556.83	211.999	1.57e-47
73	-7.81384	+	NA	NA	NA	0.791493	NA	NA	-0.0610996	NA	4	-1774.48	3556.97	212.141	1.47e-47
122	-6.27427	+	0.113266	NA	NA	0.655553	-1.11123	+	-0.0630716	NA	7	-1771.55	3557.12	212.285	1.36e-47
10	-8.02031	+	0.102155	NA	NA	0.770107	NA	NA	NA	NA	4	-1774.64	3557.28	212.453	1.25e-47
249	-6.04238	+	NA	NA	NA	0.623077	-1.08117	+	-0.0824803	0.000506912	7	-1771.71	3557.44	212.605	1.16e-47
137	-8.00584	+	NA	NA	NA	0.768424	NA	NA	NA	3.56e-05	4	-1774.85	3557.71	212.878	1.01e-47
105	-6.43155	+	NA	NA	NA	0.644413	NA	+	-0.0660536	NA	5	-1773.89	3557.78	212.952	9.77e-48
218	-7.3206	+	0.117394	NA	NA	0.756152	-1.12477	NA	-0.0754057	0.000527579	7	-1771.96	3557.92	213.093	9.1e-48
186	-6.58068	+	0.121108	NA	NA	0.64636	-1.11117	+	NA	-3.46e-05	7	-1771.96	3557.93	213.104	9.05e-48
42	-6.77567	+	0.0978905	NA	NA	0.634642	NA	+	NA	NA	5	-1774.13	3558.27	213.439	7.66e-48
74	-7.82744	+	0.0952407	NA	NA	0.789935	NA	NA	-0.0585282	NA	5	-1774.3	3558.6	213.772	6.48e-48
169	-6.74915	+	NA	NA	NA	0.634171	NA	+	NA	-2.61e-05	5	-1774.33	3558.66	213.83	6.3e-48
201	-7.58294	+	NA	NA	NA	0.755216	NA	NA	-0.0795126	0.000569537	5	-1774.36	3558.73	213.897	6.09e-48
250	-6.09545	+	0.112147	NA	NA	0.626418	-1.10927	+	-0.0789359	0.000491424	8	-1771.46	3558.93	214.096	5.51e-48
138	-8.0075	+	0.102229	NA	NA	0.766917	NA	NA	NA	4.26e-05	5	-1774.64	3559.28	214.453	4.61e-48
106	-6.47408	+	0.089984	NA	NA	0.646143	NA	+	-0.0635569	NA	6	-1773.72	3559.45	214.623	4.24e-48
233	-6.23986	+	NA	NA	NA	0.613156	NA	+	-0.0830519	0.000528388	6	-1773.78	3559.57	214.738	4e-48
170	-6.77958	+	0.0978473	NA	NA	0.635836	NA	+	NA	-1.83e-05	6	-1774.13	3560.27	215.441	2.81e-48
202	-7.60212	+	0.0940115	NA	NA	0.754591	NA	NA	-0.0765347	0.000555641	6	-1774.18	3560.37	215.538	2.68e-48
51	-1.55399	+	NA	-2.37511	NA	NA	-0.996845	+	NA	NA	5	-1775.31	3560.63	215.8	2.35e-48
234	-6.28624	+	0.0889004	NA	NA	0.61559	NA	+	-0.0802046	0.000515957	7	-1773.62	3561.25	216.417	1.73e-48
243	-1.26177	+	NA	-2.44337	NA	NA	-0.999058	+	-0.12004	0.00177785	7	-1773.74	3561.5	216.668	1.52e-48
179	-1.81821	+	NA	-2.33402	NA	NA	-0.996564	+	NA	0.00102968	6	-1774.8	3561.61	216.779	1.44e-48
115	-1.16421	+	NA	-2.44048	NA	NA	-0.998264	+	-0.0627517	NA	6	-1774.96	3561.94	217.106	1.22e-48
35	-1.79229	+	NA	-2.41015	NA	NA	NA	+	NA	NA	4	-1777.07	3562.15	217.319	1.1e-48
52	-1.56643	+	0.0875471	-2.35955	NA	NA	-1.01869	+	NA	NA	6	-1775.15	3562.32	217.486	1.01e-48
227	-1.50246	+	NA	-2.48043	NA	NA	NA	+	-0.119558	0.00177533	6	-1775.51	3563.03	218.201	7.08e-49
163	-2.05657	+	NA	-2.36909	NA	NA	NA	+	NA	0.00103017	5	-1776.56	3563.13	218.296	6.75e-49
244	-1.28547	+	0.0803183	-2.42708	NA	NA	-1.01906	+	-0.117864	0.0017731	8	-1773.61	3563.24	218.405	6.39e-49
180	-1.83381	+	0.0909087	-2.31705	NA	NA	-1.01917	+	NA	0.00103966	7	-1774.63	3563.27	218.442	6.28e-49
99	-1.40556	+	NA	-2.47614	NA	NA	NA	+	-0.0622833	NA	5	-1776.73	3563.47	218.634	5.7e-49
116	-1.18831	+	0.0811949	-2.42445	NA	NA	-1.01857	+	-0.0607131	NA	7	-1774.83	3563.67	218.836	5.15e-49
36	-1.80578	+	0.0664345	-2.39865	NA	NA	NA	+	NA	NA	5	-1776.98	3563.97	219.138	4.43e-49
49	-2.01495	+	NA	NA	NA	NA	-1.02182	+	NA	NA	4	-1778.29	3564.58	219.754	3.26e-49
228	-1.5237	+	0.0592147	-2.46868	NA	NA	NA	+	-0.117921	0.00177167	7	-1775.44	3564.89	220.058	2.8e-49
164	-2.07282	+	0.0698533	-2.35636	NA	NA	NA	+	NA	0.00103788	6	-1776.46	3564.93	220.096	2.74e-49
100	-1.4272	+	0.060035	-2.46455	NA	NA	NA	+	-0.0607496	NA	6	-1776.66	3565.32	220.487	2.26e-49
177	-2.27644	+	NA	NA	NA	NA	-1.02204	+	NA	0.00105169	5	-1777.78	3565.57	220.738	1.99e-49
241	-1.75468	+	NA	NA	NA	NA	-1.02495	+	-0.117139	0.00178293	6	-1776.81	3565.62	220.788	1.94e-49
113	-1.6501	+	NA	NA	NA	NA	-1.02323	+	-0.0607595	NA	5	-1777.98	3565.96	221.126	1.64e-49
50	-2.02529	+	0.0959428	NA	NA	NA	-1.04565	+	NA	NA	5	-1778.1	3566.21	221.378	1.45e-49
33	-2.26626	+	NA	NA	NA	NA	NA	+	NA	NA	3	-1780.14	3566.28	221.454	1.39e-49
178	-2.28987	+	0.0994081	NA	NA	NA	-1.04664	+	NA	0.00106244	6	-1777.58	3567.17	222.334	8.96e-50
161	-2.52802	+	NA	NA	NA	NA	NA	+	NA	0.00105255	4	-1779.63	3567.27	222.438	8.51e-50
242	-1.77763	+	0.0895011	NA	NA	NA	-1.04717	+	-0.11468	0.00177716	7	-1776.64	3567.29	222.462	8.41e-50
225	-2.00878	+	NA	NA	NA	NA	NA	+	-0.116738	0.00178169	5	-1778.67	3567.34	222.508	8.22e-50
114	-1.67355	+	0.0899898	NA	NA	NA	-1.04562	+	-0.0584656	NA	6	-1777.81	3567.63	222.796	7.12e-50
97	-1.90404	+	NA	NA	NA	NA	NA	+	-0.0603772	NA	4	-1779.83	3567.67	222.835	6.98e-50
34	-2.27887	+	0.0742915	NA	NA	NA	NA	+	NA	NA	4	-1780.03	3568.06	223.227	5.73e-50
162	-2.54333	+	0.077792	NA	NA	NA	NA	+	NA	0.00106112	5	-1779.51	3569.02	224.19	3.54e-50
226	-2.03061	+	0.0678614	NA	NA	NA	NA	+	-0.114853	0.00177749	6	-1778.57	3569.15	224.32	3.32e-50
98	-1.92631	+	0.0682971	NA	NA	NA	NA	+	-0.0585958	NA	5	-1779.74	3569.48	224.645	2.82e-50
211	-2.84092	+	NA	-3.32791	NA	NA	-1.01004	NA	-0.138925	0.00336231	6	-1779.8	3571.6	226.766	9.77e-51
147	-3.51764	+	NA	-3.20217	NA	NA	-1.00774	NA	NA	0.00252327	5	-1780.96	3571.92	227.086	8.33e-51
195	-3.08874	+	NA	-3.3688	NA	NA	NA	NA	-0.138551	0.00336507	5	-1781.6	3573.21	228.375	4.37e-51
212	-2.86165	+	0.0828284	-3.30896	NA	NA	-1.03092	NA	-0.136636	0.00335355	7	-1779.65	3573.32	228.486	4.14e-51
131	-3.76359	+	NA	-3.24073	NA	NA	NA	NA	NA	0.00252815	4	-1782.75	3573.51	228.679	3.76e-51
148	-3.5279	+	0.0928319	-3.18224	NA	NA	-1.03105	NA	NA	0.0025285	6	-1780.78	3573.56	228.734	3.65e-51
196	-3.10796	+	0.0612538	-3.35491	NA	NA	NA	NA	-0.136828	0.00335842	6	-1781.52	3575.05	230.222	1.74e-51
132	-3.77582	+	0.0712913	-3.22555	NA	NA	NA	NA	NA	0.00253227	5	-1782.65	3575.3	230.471	1.53e-51
19	-3.3286	+	NA	-3.58498	NA	NA	-1.01033	NA	NA	NA	4	-1783.74	3575.47	230.643	1.41e-51
3	-3.57498	+	NA	-3.62413	NA	NA	NA	NA	NA	NA	3	-1785.54	3577.09	232.256	6.28e-52
20	-3.33788	+	0.0861206	-3.56822	NA	NA	-1.03214	NA	NA	NA	5	-1783.58	3577.17	232.339	6.02e-52
83	-3.21476	+	NA	-3.6186	NA	NA	-1.01078	NA	-0.0214531	NA	5	-1783.7	3577.41	232.582	5.33e-52
4	-3.58584	+	0.0643714	-3.61193	NA	NA	NA	NA	NA	NA	4	-1785.46	3578.92	234.086	2.52e-52
67	-3.46416	+	NA	-3.65723	NA	NA	NA	NA	-0.0208941	NA	4	-1785.51	3579.03	234.198	2.38e-52
84	-3.23454	+	0.0846113	-3.59924	NA	NA	-1.03221	NA	-0.0194564	NA	6	-1783.56	3579.12	234.29	2.27e-52
209	-3.87871	+	NA	NA	NA	NA	-1.04019	NA	-0.140165	0.00371358	5	-1784.61	3579.22	234.39	2.16e-52
145	-4.52988	+	NA	NA	NA	NA	-1.03756	NA	NA	0.00286043	4	-1785.71	3579.43	234.596	1.95e-52
210	-3.89489	+	0.0933483	NA	NA	NA	-1.06363	NA	-0.1375	0.00370042	6	-1784.43	3580.87	236.036	9.49e-53
68	-3.48287	+	0.0628567	-3.64305	NA	NA	NA	NA	-0.0193767	NA	5	-1785.43	3580.87	236.037	9.48e-53
146	-4.53312	+	0.102743	NA	NA	NA	-1.0633	NA	NA	0.00286301	5	-1785.5	3581	236.167	8.89e-53
193	-4.14853	+	NA	NA	NA	NA	NA	NA	-0.140007	0.00372399	4	-1786.52	3581.05	236.218	8.66e-53
129	-4.79811	+	NA	NA	NA	NA	NA	NA	NA	0.00287171	3	-1787.62	3581.24	236.406	7.88e-53
194	-4.16546	+	0.0710416	NA	NA	NA	NA	NA	-0.137937	0.00371378	5	-1786.42	3582.84	238.012	3.53e-53
130	-4.80565	+	0.0804625	NA	NA	NA	NA	NA	NA	0.00287375	4	-1787.48	3582.97	238.142	3.31e-53
17	-4.44535	+	NA	NA	NA	NA	-1.03959	NA	NA	NA	3	-1789.01	3584.02	239.191	1.96e-53
18	-4.44892	+	0.0955419	NA	NA	NA	-1.06375	NA	NA	NA	4	-1788.82	3585.65	240.818	8.68e-54
1	-4.71386	+	NA	NA	NA	NA	NA	NA	NA	NA	2	-1790.92	3585.85	241.017	7.86e-54
81	-4.3855	+	NA	NA	NA	NA	-1.03984	NA	-0.0122859	NA	4	-1789	3586	241.173	7.27e-54
2	-4.72117	+	0.0730565	NA	NA	NA	NA	NA	NA	NA	3	-1790.81	3587.63	242.798	3.23e-54
82	-4.40003	+	0.0948106	NA	NA	NA	-1.06379	NA	-0.0100397	NA	5	-1788.82	3587.64	242.808	3.21e-54
65	-4.65683	+	NA	NA	NA	NA	NA	NA	-0.0117221	NA	3	-1790.91	3587.83	243.001	2.92e-54
66	-4.67262	+	0.0723559	NA	NA	NA	NA	NA	-0.00997385	NA	4	-1790.81	3589.62	244.787	1.19e-54

## Sheet: BB_Jackal
	cond((Int))	disp((Int))	cond(All_Livestock_1)	cond(Dist_Road_K)	cond(Fencing_2)	cond(Height_meters)	cond(ndvi)	cond(Underpass_type)	cond(Water_source)	cond(Width_meters)	df	logLik	AICc	delta	weight
14	-8.60927	+	-18.3566	NA	-1.2337	0.372524	NA	NA	NA	NA	5	-140.034	290.074	0	0.0700744		Family: binomial ( logit )
142	-8.98421	+	-37.5505	NA	+	0.483166	NA	NA	NA	-0.00215711	6	-139.375	290.757	0.683119	0.0497992		Formula: Black_backed_Jackal ~ ndvi + Dist_Road_K + Fencing_2 + Water_source + Underpass_type + All_Livestock_1 + Width_meters + Height_meters +
13	-8.78367	+	NA	NA	+	0.38597	NA	NA	NA	NA	4	-141.729	291.461	1.38741	0.0350176		(1 | Unique_ID)
30	-8.92609	+	-18.9526	NA	+	0.366258	1.50313	NA	NA	NA	6	-139.779	291.564	1.49065	0.0332559		Data: nomitdata
78	-8.34116	+	-18.7924	NA	+	0.383393	NA	NA	-0.0621638	NA	6	-139.824	291.655	1.58182	0.031774
16	-8.3907	+	-18.9115	-0.631026	+	0.368856	NA	NA	NA	NA	6	-139.896	291.8	1.72614	0.0295619		AIC BIC logLik deviance df.resid
46	-8.57378	+	-18.5068	NA	+	0.368815	NA	+	NA	NA	6	-140.034	292.075	2.00148	0.0257598		297.8 371.7 -138.9 277.8 11900
141	-9.1704	+	NA	NA	+	0.499326	NA	NA	NA	-0.00223447	5	-141.077	292.158	2.0849	0.0247075
158	-9.2625	+	-18.8966	NA	+	0.472981	1.37781	NA	NA	-0.00205964	7	-139.159	292.328	2.25481	0.0226952		Random effects:
144	-8.74281	+	-18.0099	-0.78205	+	0.486032	NA	NA	NA	-0.00226786	7	-139.168	292.346	2.27204	0.0225005
174	-8.76868	+	-39.157	NA	+	0.461901	NA	+	NA	-0.0022078	7	-139.364	292.737	2.66335	0.0185021		Conditional model:
206	-8.89941	+	-18.7785	NA	+	0.47896	NA	NA	-0.0141259	-0.00205282	7	-139.366	292.742	2.66831	0.0184563		Groups Name Variance Std.Dev.
38	-5.91766	+	-18.4927	NA	+	NA	NA	+	NA	NA	5	-141.416	292.837	2.76386	0.0175952		Unique_ID (Intercept) 1.867 1.367
29	-9.11128	+	NA	NA	+	0.377757	1.62588	NA	NA	NA	5	-141.435	292.875	2.80108	0.0172708		Number of obs: 11910, groups: Unique_ID, 72
94	-8.66076	+	-18.6708	NA	+	0.376934	1.45139	NA	-0.0595984	NA	7	-139.585	293.179	3.10581	0.01483
32	-8.70155	+	-18.7013	-0.701081	+	0.361778	1.59811	NA	NA	NA	7	-139.609	293.227	3.15329	0.0144821		Conditional model:
77	-8.60649	+	NA	NA	+	0.394958	NA	NA	-0.0441919	NA	5	-141.625	293.255	3.18099	0.0142829			Estimate	Std. Error	z value	Pr(>|z|)
15	-8.62378	+	NA	-0.486099	+	0.383974	NA	NA	NA	NA	5	-141.65	293.305	3.23106	0.0139298		(Intercept)	-8.84	2	-4.422	9.77e-06	***
80	-8.07038	+	-18.874	-0.749971	+	0.381949	NA	NA	-0.0673887	NA	7	-139.652	293.314	3.24039	0.0138649		ndvi	1.5	2.02	0.739	0.46
45	-8.96168	+	NA	NA	+	0.404685	NA	+	NA	NA	5	-141.722	293.449	3.37547	0.0129594		Dist_Road_K	-0.855	1.38	-0.62	0.5349
62	-8.75685	+	-18.8731	NA	+	0.347803	1.53333	+	NA	NA	7	-139.772	293.554	3.4801	0.0122989		Fencing_2Y	-1.32	0.575	-2.288	0.0222	*
110	-8.22476	+	-18.979	NA	+	0.371559	NA	+	-0.0626636	NA	7	-139.821	293.652	3.57861	0.0117077		Water_source	-0.0174	0.108	-0.161	0.8724
157	-9.4584	+	NA	NA	+	0.486423	1.50228	NA	NA	-0.00211779	6	-140.825	293.657	3.58342	0.0116797		Underpass_typeCulvert	-0.0512	1.02	-0.05	0.9601
6	-6.88545	+	-18.5134	NA	+	NA	NA	NA	NA	NA	4	-142.886	293.775	3.70143	0.0110104		All_Livestock_1	-18.8	8530	-0.002	0.9982
48	-8.57047	+	-19.0084	-0.674416	+	0.389075	NA	+	NA	NA	7	-139.889	293.787	3.71347	0.0109443		Width_meters	-0.00206	0.00249	-0.826	0.4086
160	-9.02059	+	-14.9174	-0.848192	+	0.475131	1.48814	NA	NA	-0.00217005	8	-138.918	293.848	3.77415	0.0106173		Height_meters	0.463	0.253	1.832	0.0669	.
143	-8.98587	+	NA	-0.636583	+	0.503013	NA	NA	NA	-0.00233152	6	-140.945	293.897	3.82345	0.0103588		---
54	-6.32079	+	-18.6514	NA	+	NA	1.89797	+	NA	NA	6	-141.01	294.027	3.9531	0.00970858		Signif. codes: 0 ‘***’ 0.001 ‘**’ 0.01 ‘*’ 0.05 ‘.’ 0.1 ‘ ’ 1
10	-9.02036	+	-18.9162	NA	NA	0.377968	NA	NA	NA	NA	4	-143.047	294.098	4.02446	0.00936828
205	-9.22394	+	NA	NA	+	0.501889	NA	NA	0.0093133	-0.00230328	6	-141.073	294.153	4.07957	0.00911364
173	-9.16477	+	NA	NA	+	0.498771	NA	+	NA	-0.00223593	6	-141.077	294.16	4.0869	0.00908029		Family: binomial ( logit )
190	-8.93665	+	-18.547	NA	+	0.439171	1.43724	+	NA	-0.00213004	8	-139.133	294.278	4.20436	0.00856237		Formula: Black_backed_Jackal ~ Fencing_2 + All_Livestock_1 + Height_meters + (1 | Unique_ID)
222	-9.18535	+	-18.7895	NA	+	0.46925	1.37257	NA	-0.0127651	-0.0019658	8	-139.152	294.317	4.2435	0.00839642		Data: nomitdata
208	-8.62916	+	-18.4989	-0.806066	+	0.481187	NA	NA	-0.0181171	-0.00213927	8	-139.154	294.32	4.2465	0.00838386
176	-8.78256	+	-18.67	-0.792732	+	0.490352	NA	+	NA	-0.00225954	8	-139.168	294.347	4.27391	0.00826973		AIC BIC logLik deviance df.resid
102	-5.58303	+	-18.8204	NA	+	NA	NA	+	-0.0575428	NA	6	-141.235	294.476	4.40266	0.00775414		290.1 327.0 -140.0 280.1 11905
166	-5.74991	+	-18.3861	NA	+	NA	NA	+	NA	-0.00074462	6	-141.294	294.594	4.52082	0.0073093
31	-8.94138	+	NA	-0.558141	+	0.375102	1.70046	NA	NA	NA	6	-141.33	294.667	4.5938	0.0070474		Random effects:
93	-8.94028	+	NA	NA	+	0.386292	1.59	NA	-0.0411956	NA	6	-141.343	294.694	4.62016	0.00695511
37	-6.06951	+	NA	NA	+	NA	NA	+	NA	NA	4	-143.348	294.699	4.62518	0.00693767		Conditional model:
238	-8.66854	+	-18.6558	NA	+	0.456437	NA	+	-0.0149259	-0.00210013	8	-139.354	294.72	4.64681	0.00686306		Groups Name Variance Std.Dev.
40	-5.85177	+	-18.5489	-0.315008	+	NA	NA	+	NA	NA	6	-141.379	294.766	4.69223	0.00670896		Unique_ID (Intercept) 2.092 1.446
96	-8.38319	+	-18.4704	-0.825518	+	0.374869	1.55799	NA	-0.06541	NA	8	-139.378	294.768	4.69432	0.00670193		Number of obs: 11910, groups: Unique_ID, 72
138	-9.39425	+	-33.1411	NA	NA	0.488399	NA	NA	NA	-0.00213998	5	-142.382	294.769	4.69584	0.00669684
61	-9.14795	+	NA	NA	+	0.381772	1.61944	+	NA	NA	6	-141.434	294.876	4.80248	0.00634913		Conditional model:
79	-8.4137	+	NA	-0.559609	+	0.39443	NA	NA	-0.0478268	NA	6	-141.529	295.066	4.9924	0.00577395			Estimate	Std. Error	z value	Pr(>|z|)
126	-8.41771	+	-18.9282	NA	+	0.351145	1.49269	+	-0.0605616	NA	8	-139.572	295.156	5.08287	0.00551859		(Intercept)	-8.6093	1.1547	-7.456	8.91e-14	***
22	-7.26097	+	-18.5252	NA	+	NA	1.64847	NA	NA	NA	5	-142.576	295.157	5.08386	0.00551586		Fencing_2Y	-1.2337	0.5588	-2.208	0.0272	*
64	-8.76021	+	-18.4834	-0.715438	+	0.368616	1.58866	+	NA	NA	8	-139.608	295.228	5.1543	0.00532498		All_Livestock_1	-18.3566	6967.64	-0.003	0.9979
109	-8.73371	+	NA	NA	+	0.407945	NA	+	-0.0436048	NA	6	-141.621	295.25	5.17635	0.00526659		Height_meters	0.3725	0.1659	2.246	0.0247	*
47	-8.96521	+	NA	-0.56928	+	0.42255	NA	+	NA	NA	6	-141.623	295.252	5.17891	0.00525984		---
112	-8.20105	+	-18.8563	-0.784357	+	0.396533	NA	+	-0.0670706	NA	8	-139.648	295.309	5.23525	0.00511375		Signif. codes: 0 ‘***’ 0.001 ‘**’ 0.01 ‘*’ 0.05 ‘.’ 0.1 ‘ ’ 1
159	-9.26959	+	NA	-0.704688	+	0.489635	1.59276	NA	NA	-0.00221634	7	-140.663	295.336	5.26284	0.00504368
8	-6.65011	+	-13.3532	-0.715193	+	NA	NA	NA	NA	NA	5	-142.686	295.376	5.30284	0.00494381
5	-7.01273	+	NA	NA	+	NA	NA	NA	NA	NA	3	-144.72	295.443	5.36915	0.00478259
74	-8.70554	+	-18.9242	NA	NA	0.389719	NA	NA	-0.0706972	NA	5	-142.779	295.563	5.48927	0.0045038
70	-6.67143	+	-18.9835	NA	+	NA	NA	NA	-0.0416322	NA	5	-142.796	295.596	5.5228	0.00442893
221	-9.52142	+	NA	NA	+	0.489355	1.50694	NA	0.0108724	-0.00219767	7	-140.82	295.649	5.57569	0.00431334
189	-9.33578	+	NA	NA	+	0.473698	1.52427	+	NA	-0.00214668	7	-140.821	295.652	5.57813	0.00430808
118	-5.99475	+	-18.8617	NA	+	NA	1.86685	+	-0.0552413	NA	7	-140.839	295.688	5.6147	0.00423003
134	-6.90867	+	-18.7341	NA	+	NA	NA	NA	NA	0.000330563	5	-142.855	295.716	5.64242	0.00417179
182	-6.15424	+	-18.4486	NA	+	NA	1.90405	+	NA	-0.000747468	7	-140.884	295.777	5.70334	0.00404664
12	-8.78715	+	-19.0904	-0.66245	NA	0.37385	NA	NA	NA	NA	5	-142.894	295.794	5.72028	0.00401252
53	-6.49021	+	NA	NA	+	NA	2.00634	+	NA	NA	5	-142.904	295.812	5.73866	0.0039758
224	-8.91182	+	-18.9638	-0.873117	+	0.470652	1.48386	NA	-0.0172727	-0.00204813	9	-138.905	295.825	5.75151	0.00395034
192	-8.95865	+	-10.3536	-0.831317	+	0.468103	1.49842	+	NA	-0.00218182	9	-138.917	295.849	5.7752	0.00390383
175	-9.18485	+	NA	-0.690506	+	0.524648	NA	+	NA	-0.00228564	7	-140.935	295.879	5.80528	0.00384556
207	-9.02528	+	NA	-0.629191	+	0.504659	NA	NA	0.00660139	-0.00237867	7	-140.943	295.896	5.82212	0.00381331
56	-6.25048	+	-18.6704	-0.371277	+	NA	1.93505	+	NA	NA	7	-140.958	295.925	5.85176	0.00375722
42	-8.87554	+	-18.8485	NA	NA	0.362879	NA	+	NA	NA	5	-143.043	296.091	6.01739	0.0034586
26	-9.05558	+	-19.0877	NA	NA	0.377468	0.148532	NA	NA	NA	5	-143.045	296.094	6.02072	0.00345284
237	-9.22479	+	NA	NA	+	0.501971	NA	+	0.00931661	-0.0023031	7	-141.073	296.155	6.08192	0.00334878
254	-8.84381	+	-18.498	NA	+	0.434226	1.43267	+	-0.0138679	-0.00203026	9	-139.125	296.264	6.19073	0.00317146
140	-9.13758	+	-19.8361	-0.814797	NA	0.490932	NA	NA	NA	-0.00225293	6	-142.156	296.32	6.24631	0.00308455
240	-8.66219	+	-18.8294	-0.814981	+	0.484756	NA	+	-0.018057	-0.00213284	9	-139.154	296.323	6.24897	0.00308044
104	-5.50709	+	-18.7367	-0.341208	+	NA	NA	+	-0.0580758	NA	7	-141.194	296.398	6.32447	0.00296632
230	-5.54962	+	-38.2443	NA	+	NA	NA	+	-0.0458221	-0.000464154	7	-141.198	296.405	6.33113	0.00295646
95	-8.73652	+	NA	-0.63389	+	0.385271	1.67077	NA	-0.0453605	NA	7	-141.221	296.45	6.3769	0.00288957
168	-5.68472	+	-18.8862	-0.31441	+	NA	NA	+	NA	-0.000741488	7	-141.257	296.523	6.4491	0.00278712
165	-5.92684	+	NA	NA	+	NA	NA	+	NA	-0.000646347	5	-143.259	296.523	6.44979	0.00278616
101	-5.85216	+	NA	NA	+	NA	NA	+	-0.0383227	NA	5	-143.27	296.545	6.4717	0.00275581
63	-9.15749	+	NA	-0.611713	+	0.400392	1.66668	+	NA	NA	7	-141.319	296.647	6.57319	0.00261944
9	-9.23281	+	NA	NA	NA	0.388976	NA	NA	NA	NA	3	-145.326	296.655	6.5814	0.00260871
39	-6.03284	+	NA	-0.179236	+	NA	NA	+	NA	NA	5	-143.336	296.678	6.60394	0.00257947
24	-7.02581	+	-12.4476	-0.772948	+	NA	1.74098	NA	NA	NA	6	-142.341	296.69	6.61602	0.00256395
125	-8.93097	+	NA	NA	+	0.385301	1.59157	+	-0.0412352	NA	7	-141.343	296.696	6.62248	0.00255568
202	-9.24633	+	-18.9409	NA	NA	0.481067	NA	NA	-0.0241508	-0.00196179	6	-142.358	296.722	6.64856	0.00252257
170	-9.07109	+	-37.4269	NA	NA	0.45657	NA	+	NA	-0.00221204	6	-142.358	296.723	6.64919	0.00252177
21	-7.40443	+	NA	NA	+	NA	1.7685	NA	NA	NA	4	-144.371	296.745	6.6713	0.00249405
34	-6.25444	+	-13.0999	NA	NA	NA	NA	+	NA	NA	4	-144.378	296.76	6.68658	0.00247506
128	-8.39976	+	-18.8793	-0.829919	+	0.376788	1.55543	+	-0.0653772	NA	9	-139.378	296.771	6.69722	0.00246194
154	-9.40491	+	-19.0859	NA	NA	0.488125	0.0462472	NA	NA	-0.00213729	6	-142.382	296.771	6.69734	0.00246179
86	-7.05248	+	-18.6383	NA	+	NA	1.62726	NA	-0.0398767	NA	6	-142.493	296.993	6.91976	0.00220268
111	-8.72286	+	NA	-0.638458	+	0.428891	NA	+	-0.0469004	NA	7	-141.508	297.025	6.9515	0.002168
150	-7.28779	+	-18.8822	NA	+	NA	1.66046	NA	NA	0.000348988	6	-142.542	297.091	7.01721	0.00209793
76	-8.41574	+	-19.3828	-0.795401	NA	0.388089	NA	NA	-0.076079	NA	6	-142.587	297.18	7.10658	0.00200626
72	-6.42133	+	-18.7536	-0.745385	+	NA	NA	NA	-0.0426747	NA	6	-142.59	297.186	7.11269	0.00200013
7	-6.8301	+	NA	-0.574161	+	NA	NA	NA	NA	NA	4	-144.596	297.195	7.12188	0.00199096
223	-9.31602	+	NA	-0.695163	+	0.491508	1.595	NA	0.00773045	-0.00227126	8	-140.661	297.334	7.26045	0.00185769
191	-9.36313	+	NA	-0.730417	+	0.500249	1.57796	+	NA	-0.00219689	8	-140.661	297.334	7.26077	0.00185739
136	-6.674	+	-13.6612	-0.696783	+	NA	NA	NA	NA	0.000252816	6	-142.668	297.343	7.26907	0.0018497
137	-9.62147	+	NA	NA	NA	0.502885	NA	NA	NA	-0.0022479	4	-144.674	297.351	7.27739	0.00184202
133	-7.03885	+	NA	NA	+	NA	NA	NA	NA	0.000389315	4	-144.68	297.363	7.28949	0.00183091
69	-6.90169	+	NA	NA	+	NA	NA	NA	-0.0223735	NA	4	-144.695	297.393	7.31959	0.00180356
198	-6.62041	+	-18.5362	NA	+	NA	NA	NA	-0.0608947	0.000689934	6	-142.693	297.393	7.31974	0.00180343
106	-8.46649	+	-19.0593	NA	NA	0.365502	NA	+	-0.0716753	NA	6	-142.767	297.542	7.46824	0.00167437
90	-8.73489	+	-19.0413	NA	NA	0.389283	0.121262	NA	-0.0705891	NA	6	-142.777	297.561	7.48768	0.00165817
120	-5.91243	+	-18.726	-0.403386	+	NA	1.90839	+	-0.0560215	NA	8	-140.783	297.577	7.5036	0.00164503
246	-5.96242	+	-11.5471	NA	+	NA	1.87666	+	-0.04289	-0.000484928	8	-140.798	297.609	7.53528	0.00161918
181	-6.34922	+	NA	NA	+	NA	2.01082	+	NA	-0.000646186	6	-142.812	297.632	7.55841	0.00160056
253	-9.40286	+	NA	NA	+	0.477188	1.52767	+	0.0104333	-0.00222164	8	-140.817	297.645	7.57154	0.00159009
184	-6.0849	+	-18.546	-0.370539	+	NA	1.94121	+	NA	-0.000743228	8	-140.832	297.675	7.6017	0.00156628
117	-6.28447	+	NA	NA	+	NA	1.98568	+	-0.0357043	NA	6	-142.834	297.676	7.60213	0.00156595
55	-6.44632	+	NA	-0.235589	+	NA	2.02898	+	NA	NA	6	-142.883	297.774	7.70017	0.00149104
28	-8.84051	+	-18.8098	-0.674434	NA	0.372912	0.245105	NA	NA	NA	6	-142.887	297.781	7.70764	0.00148548
44	-8.87177	+	-19.137	-0.682694	NA	0.383324	NA	+	NA	NA	6	-142.893	297.793	7.71902	0.00147705
256	-8.84315	+	-18.8191	-0.854451	+	0.462911	1.49482	+	-0.0173903	-0.00206018	10	-138.904	297.826	7.75238	0.00145262
239	-9.2307	+	NA	-0.682846	+	0.526746	NA	+	0.00718215	-0.00233614	8	-140.933	297.877	7.80363	0.00141587
2	-7.27822	+	-18.7869	NA	NA	NA	NA	NA	NA	NA	3	-145.972	297.946	7.87264	0.00136784
58	-8.90117	+	-19.149	NA	NA	0.360706	0.172645	+	NA	NA	6	-143.039	298.086	8.01219	0.00127566
204	-8.95834	+	-18.8176	-0.851322	NA	0.483289	NA	NA	-0.0281054	-0.00205326	7	-142.123	298.255	8.18175	0.00117197
98	-5.8634	+	-19.0695	NA	NA	NA	NA	+	-0.0661895	NA	5	-144.139	298.284	8.21047	0.00115526
156	-9.17157	+	-19.16	-0.822707	NA	0.489953	0.160376	NA	NA	-0.00224429	7	-142.153	298.316	8.24239	0.00113697
172	-9.08426	+	-37.8193	-0.800679	NA	0.485157	NA	+	NA	-0.00226349	7	-142.156	298.321	8.24721	0.00113423
232	-5.47637	+	-36.2787	-0.334655	+	NA	NA	+	-0.046434	-0.000457142	8	-141.158	298.328	8.25473	0.00112997
127	-8.92504	+	NA	-0.682846	+	0.407073	1.64265	+	-0.0448809	NA	8	-141.212	298.436	8.36255	0.00107067
23	-7.21822	+	NA	-0.630322	+	NA	1.8408	NA	NA	NA	5	-144.219	298.443	8.36906	0.00106719
73	-9.05997	+	NA	NA	NA	0.39785	NA	NA	-0.04333	NA	4	-145.227	298.457	8.38354	0.00105949
229	-5.8171	+	NA	NA	+	NA	NA	+	-0.0258021	-0.000488008	6	-143.23	298.467	8.39318	0.0010544
11	-9.06834	+	NA	-0.496619	NA	0.386838	NA	NA	NA	NA	4	-145.244	298.491	8.41792	0.00104143
162	-6.07781	+	-18.884	NA	NA	NA	NA	+	NA	-0.000776783	5	-144.244	298.493	8.41927	0.00104073
167	-5.89043	+	NA	-0.179049	+	NA	NA	+	NA	-0.000645005	6	-143.248	298.502	8.42879	0.00103579
88	-6.80148	+	-19.1837	-0.805833	+	NA	1.72282	NA	-0.0411174	NA	7	-142.251	298.512	8.43863	0.00103071
103	-5.81182	+	NA	-0.189353	+	NA	NA	+	-0.0385063	NA	6	-143.258	298.523	8.44939	0.00102518
41	-9.42376	+	NA	NA	NA	0.409061	NA	+	NA	NA	4	-145.319	298.641	8.5671	0.000966577
25	-9.26805	+	NA	NA	NA	0.388226	0.158043	NA	NA	NA	4	-145.323	298.65	8.57676	0.000961922
152	-7.05217	+	-13.2318	-0.753797	+	NA	1.74793	NA	NA	0.000265987	7	-142.321	298.652	8.57795	0.000961351
149	-7.43422	+	NA	NA	+	NA	1.782	NA	NA	0.000406398	5	-144.326	298.656	8.58254	0.000959146
234	-8.89867	+	-19.1502	NA	NA	0.447202	NA	+	-0.0252588	-0.00202991	7	-142.331	298.671	8.59719	0.000952147
36	-6.18535	+	-12.848	-0.32922	NA	NA	NA	+	NA	NA	5	-144.338	298.681	8.60711	0.000947436
50	-6.36996	+	-13.0307	NA	NA	NA	0.493228	+	NA	NA	5	-144.348	298.702	8.62818	0.000937505
85	-7.30171	+	NA	NA	+	NA	1.7574	NA	-0.0203091	NA	5	-144.349	298.704	8.63044	0.000936448
186	-9.08542	+	-18.0226	NA	NA	0.455168	0.0980756	+	NA	-0.00220788	7	-142.357	298.723	8.64921	0.0009277
218	-9.25679	+	-19.0981	NA	NA	0.480798	0.0452465	NA	-0.0241481	-0.00195913	7	-142.357	298.724	8.65041	0.000927143
214	-7.003	+	-19.0161	NA	+	NA	1.64051	NA	-0.0595458	0.000700563	7	-142.386	298.781	8.70782	0.000900909
200	-6.38501	+	-18.8457	-0.717037	+	NA	NA	NA	-0.0598577	0.000606535	7	-142.51	299.029	8.9552	0.000796091
139	-9.43239	+	NA	-0.647309	NA	0.506509	NA	NA	NA	-0.00234695	5	-144.538	299.08	9.00683	0.000775804
135	-6.8598	+	NA	-0.550529	+	NA	NA	NA	NA	0.000329927	5	-144.567	299.139	9.0653	0.000753452
71	-6.71256	+	NA	-0.586504	+	NA	NA	NA	-0.0229338	NA	5	-144.569	299.143	9.06965	0.000751814
92	-8.46646	+	-19.1004	-0.807753	NA	0.387202	0.230319	NA	-0.0759614	NA	7	-142.58	299.17	9.09598	0.00074198
108	-8.44313	+	-19.1732	-0.802642	NA	0.391138	NA	+	-0.0760168	NA	7	-142.586	299.182	9.10859	0.000737318
197	-6.85576	+	NA	NA	+	NA	NA	NA	-0.0400923	0.000627862	5	-144.611	299.228	9.15404	0.000720752
255	-9.414	+	NA	-0.721132	+	0.502504	1.57973	+	0.00797745	-0.00225277	9	-140.658	299.332	9.25841	0.000684103
201	-9.68217	+	NA	NA	NA	0.505789	NA	NA	0.0105883	-0.0023262	5	-144.669	299.343	9.26961	0.000680281
153	-9.63472	+	NA	NA	NA	0.502406	0.0617243	NA	NA	-0.0022439	5	-144.673	299.352	9.27816	0.00067738
169	-9.6277	+	NA	NA	NA	0.503499	NA	+	NA	-0.00224628	5	-144.674	299.353	9.27906	0.000677077
248	-5.88343	+	-13.4785	-0.394843	+	NA	1.91684	+	-0.0437853	-0.000475018	9	-140.743	299.5	9.42672	0.000628889
4	-7.02982	+	-18.6297	-0.745858	NA	NA	NA	NA	NA	NA	4	-145.754	299.51	9.43687	0.000625705
122	-8.4907	+	-19.3568	NA	NA	0.36351	0.158193	+	-0.0715878	NA	7	-142.764	299.538	9.46453	0.00061711
245	-6.25079	+	NA	NA	+	NA	1.9962	+	-0.0225758	-0.00050774	7	-142.789	299.588	9.51474	0.00060181
183	-6.30577	+	NA	-0.235286	+	NA	2.03338	+	NA	-0.00064403	7	-142.792	299.594	9.5201	0.000600199
119	-6.23561	+	NA	-0.249061	+	NA	2.00995	+	-0.0360317	NA	7	-142.813	299.635	9.56143	0.000587924
66	-7.01697	+	-19.3588	NA	NA	NA	NA	NA	-0.0499099	NA	4	-145.845	299.693	9.61946	0.000571111
60	-8.90652	+	-19.3297	-0.690215	NA	0.380553	0.236163	+	NA	NA	7	-142.886	299.781	9.7079	0.000546405
130	-7.3021	+	-17.9497	NA	NA	NA	NA	NA	NA	0.000342115	4	-145.94	299.883	9.80899	0.000519476
18	-7.34474	+	-19.2692	NA	NA	NA	0.26552	NA	NA	NA	4	-145.963	299.93	9.85649	0.000507283
33	-6.50396	+	NA	NA	NA	NA	NA	+	NA	NA	3	-146.973	299.947	9.87383	0.000502902
100	-5.78409	+	-18.8906	-0.356735	NA	NA	NA	+	-0.0666517	NA	6	-144.095	300.198	10.1242	0.000443733
226	-5.83288	+	-19.3446	NA	NA	NA	NA	+	-0.0550354	-0.000439337	6	-144.107	300.22	10.1466	0.00043879
114	-5.97954	+	-18.979	NA	NA	NA	0.4896	+	-0.0660152	NA	6	-144.11	300.227	10.1532	0.000437344
220	-8.9924	+	-18.8543	-0.85954	NA	0.482285	0.161906	NA	-0.028137	-0.00204428	8	-142.12	300.252	10.178	0.000431943
236	-8.89305	+	-18.9936	-0.833697	NA	0.476244	NA	+	-0.0282288	-0.00206507	8	-142.122	300.256	10.1823	0.000431016
75	-8.86366	+	NA	-0.567463	NA	0.397168	NA	NA	-0.0469054	NA	5	-145.129	300.263	10.1889	0.000429595
188	-9.10885	+	-18.252	-0.806067	NA	0.482904	0.169105	+	NA	-0.0022565	8	-142.152	300.317	10.243	0.000418142
216	-6.76524	+	-18.558	-0.77956	+	NA	1.73133	NA	-0.0586016	0.000612249	8	-142.169	300.349	10.2756	0.000411385
151	-7.25049	+	NA	-0.606133	+	NA	1.84956	NA	NA	0.000341796	6	-144.187	300.38	10.3067	0.000405025
87	-7.10836	+	NA	-0.643338	+	NA	1.83062	NA	-0.0210036	NA	6	-144.196	300.399	10.3251	0.000401327
164	-6.00955	+	-19.2559	-0.32838	NA	NA	NA	+	NA	-0.000773202	6	-144.203	300.413	10.3397	0.000398407
178	-6.19521	+	-19.2929	NA	NA	NA	0.502543	+	NA	-0.0007786	6	-144.213	300.432	10.3588	0.000394621
43	-9.42585	+	NA	-0.583684	NA	0.427254	NA	+	NA	NA	5	-145.214	300.434	10.3602	0.000394331
231	-5.77817	+	NA	-0.185505	+	NA	NA	+	-0.0260006	-0.000485621	7	-143.218	300.445	10.3717	0.000392082
105	-9.202	+	NA	NA	NA	0.412358	NA	+	-0.0426758	NA	5	-145.223	300.451	10.3769	0.000391053
89	-9.09073	+	NA	NA	NA	0.397164	0.134288	NA	-0.0431372	NA	5	-145.225	300.454	10.3809	0.000390279
27	-9.11504	+	NA	-0.506907	NA	0.385699	0.226226	NA	NA	NA	5	-145.238	300.481	10.4074	0.00038514
213	-7.25697	+	NA	NA	+	NA	1.76838	NA	-0.0383128	0.000634437	6	-144.262	300.531	10.4575	0.00037561
52	-6.30613	+	-12.8359	-0.348978	NA	NA	0.534276	+	NA	NA	6	-144.303	300.612	10.5389	0.000360629
57	-9.44346	+	NA	NA	NA	0.40736	0.133708	+	NA	NA	5	-145.317	300.638	10.5645	0.00035604
250	-8.91324	+	-18.5574	NA	NA	0.445785	0.0993521	+	-0.0252653	-0.00202556	8	-142.329	300.671	10.5975	0.000350224
1	-7.45304	+	NA	NA	NA	NA	NA	NA	NA	NA	2	-148.351	300.702	10.6288	0.000344782
199	-6.68027	+	NA	-0.556801	+	NA	NA	NA	-0.038973	0.000562434	6	-144.502	301.011	10.9374	0.000295489
171	-9.64628	+	NA	-0.705317	NA	0.529764	NA	+	NA	-0.00229688	6	-144.526	301.059	10.9851	0.000288518
203	-9.47979	+	NA	-0.638561	NA	0.508485	NA	NA	0.0079819	-0.00240386	6	-144.535	301.077	11.0035	0.00028588
155	-9.46168	+	NA	-0.653979	NA	0.505374	0.147048	NA	NA	-0.00233828	6	-144.535	301.077	11.0037	0.000285851
124	-8.47765	+	-19.2156	-0.810666	NA	0.388489	0.228823	+	-0.0759368	NA	8	-142.58	301.172	11.0986	0.0002726
68	-6.75434	+	-19.2411	-0.779377	NA	NA	NA	NA	-0.0506506	NA	5	-145.62	301.245	11.1719	0.000262795
217	-9.69618	+	NA	NA	NA	0.505303	0.0641889	NA	0.0106297	-0.00232234	6	-144.669	301.344	11.2706	0.000250133
233	-9.69592	+	NA	NA	NA	0.507132	NA	+	0.0106422	-0.00232309	6	-144.669	301.345	11.2715	0.00025002
185	-9.63654	+	NA	NA	NA	0.502593	0.0613913	+	NA	-0.00224338	6	-144.673	301.354	11.2802	0.000248943
194	-6.9576	+	-19.0241	NA	NA	NA	NA	NA	-0.0712881	0.000762209	5	-145.721	301.447	11.3735	0.000237599
132	-7.0544	+	-16.7082	-0.726933	NA	NA	NA	NA	NA	0.000260466	5	-145.735	301.474	11.4005	0.000234409
20	-7.11684	+	-18.7436	-0.760958	NA	NA	0.370202	NA	NA	NA	5	-145.737	301.478	11.4047	0.000233916
247	-6.20389	+	NA	-0.243472	+	NA	2.01971	+	-0.0229395	-0.000503278	8	-142.768	301.549	11.4753	0.000225801
82	-7.08307	+	-18.9998	NA	NA	NA	0.262299	NA	-0.0498601	NA	5	-145.836	301.678	11.6041	0.000211724
161	-6.36343	+	NA	NA	NA	NA	NA	+	NA	-0.000638003	4	-146.887	301.777	11.7037	0.000201437
97	-6.29286	+	NA	NA	NA	NA	NA	+	-0.0373298	NA	4	-146.9	301.802	11.7289	0.000198915
146	-7.37109	+	-17.5032	NA	NA	NA	0.274921	NA	NA	0.000345063	5	-145.93	301.865	11.7919	0.000192741
49	-6.60911	+	NA	NA	NA	NA	0.452036	+	NA	NA	4	-146.948	301.9	11.8261	0.000189479
35	-6.46472	+	NA	-0.190945	NA	NA	NA	+	NA	NA	4	-146.96	301.923	11.8492	0.000187298
116	-5.90562	+	-19.5094	-0.378163	NA	NA	0.533883	+	-0.0665108	NA	7	-144.06	302.13	12.0563	0.000168873
228	-5.75618	+	-37.0387	-0.35063	NA	NA	NA	+	-0.0555705	-0.000432279	7	-144.063	302.136	12.062	0.000168399
242	-5.95002	+	-19.4686	NA	NA	NA	0.494528	+	-0.0547525	-0.000442772	7	-144.076	302.162	12.0884	0.000166188
107	-9.18997	+	NA	-0.650498	NA	0.433551	NA	+	-0.0459162	NA	6	-145.105	302.216	12.1428	0.000161726
252	-8.91786	+	-19.131	-0.839442	NA	0.473946	0.172223	+	-0.0282801	-0.00205764	9	-142.118	302.252	12.1782	0.000158891
91	-8.90753	+	NA	-0.577162	NA	0.39607	0.20769	NA	-0.046669	NA	6	-145.124	302.254	12.1807	0.000158692
215	-7.07611	+	NA	-0.615517	+	NA	1.83724	NA	-0.0372006	0.000563637	7	-144.126	302.262	12.1887	0.000158058
180	-6.13224	+	-19.2921	-0.348418	NA	NA	0.543772	+	NA	-0.000774855	7	-144.167	302.343	12.2692	0.000151826
59	-9.45324	+	NA	-0.589551	NA	0.425049	0.186736	+	NA	NA	6	-145.21	302.428	12.354	0.000145519
3	-7.26553	+	NA	-0.586721	NA	NA	NA	NA	NA	NA	3	-148.221	302.444	12.3709	0.000144297
121	-9.21997	+	NA	NA	NA	0.410854	0.117145	+	-0.042551	NA	6	-145.221	302.449	12.3757	0.000143949
129	-7.47963	+	NA	NA	NA	NA	NA	NA	NA	0.000400482	3	-148.308	302.618	12.5447	0.000132287
65	-7.34715	+	NA	NA	NA	NA	NA	NA	-0.0214099	NA	3	-148.328	302.657	12.5835	0.000129744
17	-7.51936	+	NA	NA	NA	NA	0.274206	NA	NA	NA	3	-148.342	302.685	12.6116	0.000127934
196	-6.71137	+	-19.3738	-0.747735	NA	NA	NA	NA	-0.0698449	0.000673038	6	-145.523	303.052	12.9787	0.000106479
235	-9.70113	+	NA	-0.696257	NA	0.532281	NA	+	0.00861325	-0.00235746	7	-144.523	303.055	12.9813	0.000106345
187	-9.66398	+	NA	-0.709047	NA	0.528096	0.122531	+	NA	-0.00229142	7	-144.524	303.057	12.9839	0.000106204
219	-9.50969	+	NA	-0.645132	NA	0.507356	0.148217	NA	0.00804581	-0.00239561	7	-144.532	303.074	13.0006	0.000105322
84	-6.84134	+	-19.4133	-0.795103	NA	NA	0.368904	NA	-0.0506002	NA	6	-145.603	303.214	13.1403	9.82e-05
249	-9.70519	+	NA	NA	NA	0.506217	0.0629541	+	0.0106706	-0.00232038	7	-144.669	303.347	13.273	9.19e-05
210	-7.02807	+	-19.0772	NA	NA	NA	0.281282	NA	-0.0713551	0.000765701	6	-145.711	303.429	13.3559	8.82e-05
148	-7.14261	+	-16.5659	-0.742024	NA	NA	0.374648	NA	NA	0.000262672	6	-145.717	303.441	13.3679	8.77e-05
225	-6.25794	+	NA	NA	NA	NA	NA	+	-0.0248708	-0.000485428	5	-146.86	303.725	13.6513	7.61e-05
177	-6.46973	+	NA	NA	NA	NA	0.456298	+	NA	-0.000637988	5	-146.862	303.729	13.6552	7.59e-05
163	-6.32442	+	NA	-0.19084	NA	NA	NA	+	NA	-0.000636638	5	-146.874	303.753	13.6793	7.5e-05
113	-6.39814	+	NA	NA	NA	NA	0.442358	+	-0.0369448	NA	5	-146.876	303.757	13.6836	7.49e-05
99	-6.25034	+	NA	-0.199956	NA	NA	NA	+	-0.0374819	NA	5	-146.886	303.777	13.7034	7.41e-05
51	-6.5716	+	NA	-0.207634	NA	NA	0.474752	+	NA	NA	5	-146.933	303.871	13.797	7.07e-05
244	-5.87872	+	-16.1877	-0.371822	NA	NA	0.538182	+	-0.0553234	-0.000435381	8	-144.027	304.067	13.9932	6.41e-05
123	-9.2163	+	NA	-0.656052	NA	0.431502	0.173034	+	-0.0457598	NA	7	-145.101	304.212	14.1381	5.96e-05
131	-7.29585	+	NA	-0.562389	NA	NA	NA	NA	NA	0.000339542	4	-148.191	304.384	14.3109	5.47e-05
67	-7.15399	+	NA	-0.598012	NA	NA	NA	NA	-0.0218584	NA	4	-148.197	304.397	14.3235	5.44e-05
19	-7.34556	+	NA	-0.59949	NA	NA	0.349875	NA	NA	NA	4	-148.206	304.416	14.3427	5.38e-05
193	-7.30056	+	NA	NA	NA	NA	NA	NA	-0.0393141	0.000634461	4	-148.243	304.489	14.415	5.19e-05
145	-7.54838	+	NA	NA	NA	NA	0.284129	NA	NA	0.000402833	4	-148.298	304.6	14.5265	4.91e-05
81	-7.41313	+	NA	NA	NA	NA	0.269287	NA	-0.0212348	NA	4	-148.319	304.641	14.5673	4.81e-05
212	-6.80064	+	-19.4967	-0.764213	NA	NA	0.380454	NA	-0.0698986	0.000675638	7	-145.505	305.019	14.9454	3.98e-05
251	-9.71908	+	NA	-0.700012	NA	0.5306	0.123386	+	0.00864428	-0.00235216	8	-144.521	305.054	14.9803	3.91e-05
241	-6.3646	+	NA	NA	NA	NA	0.448548	+	-0.0243977	-0.000488314	6	-146.836	305.678	15.6049	2.86e-05
179	-6.43251	+	NA	-0.207608	NA	NA	0.479065	+	NA	-0.000636381	6	-146.846	305.7	15.6263	2.83e-05
227	-6.21678	+	NA	-0.196467	NA	NA	NA	+	-0.0250281	-0.00048308	6	-146.847	305.7	15.6265	2.83e-05
115	-6.35745	+	NA	-0.21692	NA	NA	0.465858	+	-0.0370963	NA	6	-146.86	305.727	15.6536	2.8e-05
195	-7.12146	+	NA	-0.567719	NA	NA	NA	NA	-0.0380252	0.00056652	5	-148.129	306.263	16.1897	2.14e-05
147	-7.37717	+	NA	-0.575257	NA	NA	0.355129	NA	NA	0.000341001	5	-148.175	306.356	16.2822	2.04e-05
83	-7.23403	+	NA	-0.610715	NA	NA	0.345183	NA	-0.0216381	NA	5	-148.183	306.37	16.2965	2.03e-05
209	-7.36904	+	NA	NA	NA	NA	0.280338	NA	-0.0391842	0.000636029	5	-148.233	306.471	16.3977	1.93e-05
243	-6.32529	+	NA	-0.213337	NA	NA	0.471762	+	-0.0245512	-0.000485721	7	-146.82	307.649	17.5756	1.07e-05
211	-7.20255	+	NA	-0.580798	NA	NA	0.350523	NA	-0.0378259	0.000566813	6	-148.114	308.236	18.1622	7.97e-06

## Sheet: Buffalo
	cond((Int))	disp((Int))	cond(All_Livestock_1)	cond(Dist_Road_K)	cond(Fencing_2)	cond(Height_meters)	cond(ndvi)	cond(Underpass_type)	cond(Water_source)	cond(Width_meters)	df	logLik	AICc	delta	weight
224	-9.02454	+	-2.07549	1.28976	1.17237	0.642741	1.15633	NA	-0.223988	0.00184965	9	-842.49	1702.99	0	0.09282
94	-9.40026	+	-2.0515	NA	+	0.732544	1.16711	NA	-0.126852	NA	7	-844.71	1703.43	0.436044	0.0746373		Family: binomial ( logit )
96	-9.83855	+	-2.03043	1.10735	+	0.758456	1.14325	NA	-0.136848	NA	8	-843.75	1703.51	0.517899	0.0716442		Formula: Buffaloes_1 ~ ndvi + Dist_Road_K + Fencing_2 + Water_source + Underpass_type + All_Livestock_1 + Width_meters + Height_meters + (1 | Unique_ID)
256	-7.61989	+	-2.11157	1.51991	+	0.489597	1.17291	+	-0.224641	0.00179014	10	-841.784	1703.59	0.592539	0.0690198		Data: nomitdata
222	-8.65763	+	-2.09048	NA	+	0.630758	1.18158	NA	-0.197392	0.00157322	8	-843.803	1703.62	0.623198	0.0679698
128	-8.29164	+	-2.07011	1.36015	+	0.588779	1.16076	+	-0.141053	NA	9	-842.969	1703.95	0.95984	0.0574401		AIC BIC logLik deviance df.resid
30	-9.99262	+	-1.95796	NA	+	0.707183	1.16674	NA	NA	NA	6	-846.016	1704.04	1.04571	0.055026		1703.6 1777.4 -841.8 1683.6 11900
32	-10.425	+	-1.93171	1.00156	+	0.728078	1.14679	NA	NA	NA	7	-845.27	1704.55	1.55593	0.0426359
126	-8.27339	+	-2.07988	NA	+	0.612448	1.18221	+	-0.128301	NA	8	-844.332	1704.68	1.68234	0.0400245		Random effects:
254	-7.71157	+	-2.11337	NA	+	0.530798	1.19444	+	-0.195107	0.00150603	9	-843.507	1705.03	2.03523	0.0335504
208	-8.78593	+	-2.07673	1.34606	+	0.647988	NA	NA	-0.224504	0.00183288	8	-844.578	1705.17	2.17429	0.0312968		Conditional model:
64	-8.91474	+	-1.96616	1.24359	+	0.559463	1.16234	+	NA	NA	8	-844.587	1705.19	2.19272	0.0310098		Groups Name Variance Std.Dev.
62	-8.86285	+	-1.98475	NA	+	0.585675	1.18055	+	NA	NA	7	-845.667	1705.34	2.34922	0.0286758		Unique_ID (Intercept) 2.461 1.569
80	-9.59122	+	-2.03259	1.16514	+	0.762404	NA	NA	-0.138615	NA	7	-845.793	1705.59	2.60074	0.025287		Number of obs: 11910, groups: Unique_ID, 72
78	-9.12811	+	-2.05304	NA	+	0.735491	NA	NA	-0.128094	NA	6	-846.838	1705.68	2.68909	0.0241942
240	-7.42069	+	-2.10981	1.57016	+	0.4994	NA	+	-0.225227	0.00177646	9	-843.929	1705.87	2.87884	0.0220044		Conditional model:
206	-8.3993	+	-2.0904	NA	+	0.635644	NA	NA	-0.196924	0.00154661	7	-845.982	1705.97	2.97827	0.0209372			Estimate	Std. Error	z value	Pr(>|z|)
158	-9.93185	+	-1.95553	NA	+	0.690283	1.16822	NA	NA	0.000228431	7	-845.992	1705.99	3.00015	0.0207094		(Intercept)	-7.61989	1.49768	-5.088	3.62e-07	***
112	-8.08695	+	-2.06919	1.41154	+	0.597706	NA	+	-0.142736	NA	8	-845.071	1706.15	3.16008	0.0191179		ndvi	1.17291	0.558281	2.101	0.03565	*
14	-9.72804	+	-1.95901	NA	+	0.710017	NA	NA	NA	NA	5	-848.143	1706.29	3.2967	0.0178556		Dist_Road_K	1.51991	0.808993	1.879	0.06028	.
160	-10.3509	+	-1.92799	1.01663	+	0.706034	1.14854	NA	NA	0.000300499	8	-845.228	1706.47	3.47411	0.0163399		Fencing_2Y	1.17259	0.142485	8.23	< 2e-16	***
16	-10.186	+	-1.93264	1.05805	+	0.731731	NA	NA	NA	NA	6	-847.326	1706.66	3.66458	0.0148556		Water_source	-0.224641	0.094173	-2.385	0.01706	*
110	-8.06535	+	-2.0781	NA	+	0.622491	NA	+	-0.129472	NA	7	-846.511	1707.03	4.03673	0.0123332		Underpass_typeCulvert	-1.02017	0.868961	-1.174	0.24039
192	-8.86954	+	-1.96289	1.25299	+	0.543622	1.16352	+	NA	0.000236654	9	-844.561	1707.14	4.14359	0.0116915		All_Livestock_1	-2.11157	0.752558	-2.806	0.00502	**
248	-4.3609	+	-2.10703	1.82101	+	NA	1.1833	+	-0.247635	0.00279284	9	-844.619	1707.25	4.25819	0.0110405		Width_meters	0.00179	0.001155	1.55	0.12124
190	-8.83041	+	-1.98251	NA	+	0.574422	1.18144	+	NA	0.000171793	8	-845.654	1707.32	4.32513	0.0106771		Height_meters	0.489597	0.193695	2.528	0.01148	*
48	-8.71735	+	-1.96434	1.29403	+	0.568001	NA	+	NA	NA	7	-846.695	1707.4	4.40572	0.0102554		---
238	-7.51181	+	-2.11038	NA	+	0.542071	NA	+	-0.194861	0.00148482	8	-845.729	1707.47	4.47681	0.00989725		Signif. codes: 0 ‘***’ 0.001 ‘**’ 0.01 ‘*’ 0.05 ‘.’ 0.1 ‘ ’ 1
46	-8.66135	+	-1.98277	NA	+	0.595531	NA	+	NA	NA	6	-847.84	1707.69	4.6927	0.00888452
142	-9.67329	+	-1.9568	NA	+	0.694815	NA	NA	NA	0.000206298	6	-848.124	1708.25	5.26072	0.00668793
144	-10.1168	+	-1.92915	1.07238	+	0.711116	NA	NA	NA	0.000282038	7	-847.29	1708.59	5.59428	0.00566056		Family: binomial ( logit )
176	-8.67509	+	-1.96128	1.3029	+	0.553254	NA	+	NA	0.000220514	8	-846.673	1709.36	6.3643	0.00385169		Formula: Buffaloes_1 ~ ndvi + Dist_Road_K + Fencing_2 + Water_source +
246	-4.14383	+	-2.10777	NA	+	NA	1.20464	+	-0.214291	0.00255639	8	-846.695	1709.4	6.40881	0.00376691		All_Livestock_1 + Width_meters + Height_meters + (1 | Unique_ID)
232	-4.09709	+	-2.10202	1.87802	+	NA	NA	+	-0.248488	0.00279928	8	-846.8	1709.61	6.61795	0.0033929		Data: nomitdata
174	-8.63257	+	-1.98089	NA	+	0.585524	NA	+	NA	0.000153358	7	-847.83	1709.67	6.67437	0.00329853
56	-5.04501	+	-1.98013	1.56322	+	NA	1.16798	+	NA	NA	7	-848.065	1710.14	7.14487	0.00260707		AIC BIC logLik deviance df.resid
120	-4.33447	+	-2.05172	1.66606	+	NA	1.16833	+	-0.120792	NA	8	-847.11	1710.23	7.23693	0.00248979		1703.0 1769.4 -842.5 1685.0 11901
54	-4.74894	+	-1.99894	NA	+	NA	1.18663	+	NA	NA	6	-849.428	1710.86	7.86875	0.00181537
184	-5.3642	+	-1.96611	1.56554	+	NA	1.172	+	NA	0.00119042	8	-847.501	1711.01	8.01913	0.00168388		Random effects:
118	-4.10631	+	-2.06121	NA	+	NA	1.18875	+	-0.106073	NA	7	-848.701	1711.41	8.4176	0.00137969
182	-5.06389	+	-1.98639	NA	+	NA	1.19082	+	NA	0.00117808	7	-848.9	1711.81	8.81582	0.00113061		Conditional model:
230	-3.86858	+	-2.10122	NA	+	NA	NA	+	-0.214386	0.00255847	7	-848.953	1711.92	8.9218	0.00107225		Groups Name Variance Std.Dev.
40	-4.78927	+	-1.9753	1.62056	+	NA	NA	+	NA	NA	6	-850.191	1712.39	9.39555	0.000846103		Unique_ID (Intercept) 2.464 1.57
104	-4.07044	+	-2.04695	1.72389	+	NA	NA	+	-0.122135	NA	7	-849.237	1712.48	9.48859	0.000807644		Number of obs: 11910, groups: Unique_ID, 72
38	-4.47869	+	-1.99349	NA	+	NA	NA	+	NA	NA	5	-851.621	1713.25	10.2525	0.000551244
168	-5.10782	+	-1.9618	1.623	+	NA	NA	+	NA	0.00119225	7	-849.642	1713.29	10.2987	0.000538641		Conditional model:
29	-10.2268	+	NA	NA	+	0.715833	1.16607	NA	NA	NA	5	-851.786	1713.58	10.5819	0.000467527			Estimate	Std. Error	z value	Pr(>|z|)
31	-10.7246	+	NA	1.18388	+	0.739458	1.14614	NA	NA	NA	6	-850.821	1713.65	10.6546	0.000450839		(Intercept)	-9.02454	0.961213	-9.389	< 2e-16	***
102	-3.83016	+	-2.05538	NA	+	NA	NA	+	-0.106948	NA	6	-850.901	1713.81	10.8152	0.000416046		ndvi	1.15633	0.557792	2.073	0.03817	*
95	-10.2833	+	NA	1.28085	+	0.765304	1.14438	NA	-0.109604	NA	7	-849.927	1713.86	10.8683	0.000405164		Dist_Road_K	1.28976	0.785512	1.642	0.1006
223	-9.54531	+	NA	1.44982	+	0.657606	1.15536	NA	-0.188366	0.00172998	8	-848.961	1713.93	10.939	0.000391084		Fencing_2Y	1.17237	0.142494	8.227	< 2e-16	***
93	-9.7905	+	NA	NA	+	0.736246	1.16675	NA	-0.0976157	NA	6	-851.08	1714.17	11.1721	0.000348055		Water_source	-0.223988	0.094662	-2.366	0.01797	*
166	-4.79302	+	-1.98144	NA	+	NA	NA	+	NA	0.00118021	6	-851.109	1714.22	11.23	0.000338131		All_Livestock_1	-2.07549	0.751843	-2.761	0.00577	**
63	-9.42966	+	NA	1.39375	+	0.594197	1.15641	+	NA	NA	7	-850.353	1714.72	11.722	0.000264382		Width_meters	0.00185	0.001159	1.596	0.11057
127	-8.95334	+	NA	1.4992	+	0.61848	1.1555	+	-0.112958	NA	8	-849.412	1714.84	11.8409	0.000249134		Height_meters	0.642741	0.145588	4.415	1.01e-05	***
221	-9.13824	+	NA	NA	+	0.64418	1.17781	NA	-0.15892	0.00142688	7	-850.432	1714.87	11.8801	0.000244298		---
255	-8.33928	+	NA	1.64729	+	0.525188	1.16562	+	-0.188844	0.00168252	9	-848.505	1715.03	12.0317	0.000226455		Signif. codes: 0 ‘***’ 0.001 ‘**’ 0.01 ‘*’ 0.05 ‘.’ 0.1 ‘ ’ 1
61	-9.37234	+	NA	NA	+	0.623523	1.17407	+	NA	NA	6	-851.601	1715.21	12.2148	0.000206645
157	-10.1377	+	NA	NA	+	0.691264	1.16798	NA	NA	0.000332575	6	-851.74	1715.49	12.4919	0.000179914
159	-10.6208	+	NA	1.20381	+	0.709001	1.14839	NA	NA	0.00041493	7	-850.747	1715.5	12.5092	0.000178359
15	-10.4904	+	NA	1.24033	+	0.743453	NA	NA	NA	NA	5	-852.88	1715.76	12.7705	0.00015652
125	-8.93598	+	NA	NA	+	0.644587	1.17517	+	-0.0985167	NA	7	-850.887	1715.78	12.789	0.000155076
13	-9.9678	+	NA	NA	+	0.71905	NA	NA	NA	NA	4	-853.915	1715.83	12.839	0.000151248
79	-10.0418	+	NA	1.33852	+	0.769584	NA	NA	-0.111204	NA	6	-851.979	1715.96	12.9701	0.000141653
207	-9.31129	+	NA	1.50588	+	0.663003	NA	NA	-0.188884	0.00171574	7	-851.051	1716.11	13.1168	0.000131632
77	-9.52526	+	NA	NA	+	0.739563	NA	NA	-0.0986774	NA	5	-853.211	1716.43	13.4328	0.000112393
253	-8.43457	+	NA	NA	+	0.569319	1.18466	+	-0.157254	0.00137961	8	-850.29	1716.59	13.5988	0.000103443
191	-9.35965	+	NA	1.40761	+	0.569911	1.15812	+	NA	0.000363878	8	-850.297	1716.61	13.6126	0.000102732
214	-5.96947	+	-2.00993	NA	+	NA	1.16219	NA	-0.253	0.00431756	7	-851.398	1716.8	13.8105	9.31e-05
47	-9.22751	+	NA	1.44527	+	0.60194	NA	+	NA	NA	6	-852.447	1716.9	13.9066	8.87e-05
111	-8.74437	+	NA	1.55172	+	0.626541	NA	+	-0.11449	NA	7	-851.501	1717.01	14.0172	8.39e-05
189	-9.31707	+	NA	NA	+	0.60445	1.17549	+	NA	0.00029295	7	-851.566	1717.14	14.1471	7.86e-05
205	-8.885	+	NA	NA	+	0.649146	NA	NA	-0.158506	0.00140345	6	-852.603	1717.21	14.2179	7.59e-05
216	-6.26727	+	-1.99662	1.2248	+	NA	1.14616	NA	-0.279556	0.0046288	8	-850.606	1717.22	14.2304	7.54e-05
239	-8.13506	+	NA	1.69853	+	0.534024	NA	+	-0.18943	0.00167042	8	-850.63	1717.27	14.2785	7.36e-05
45	-9.16563	+	NA	NA	+	0.632524	NA	+	NA	NA	5	-853.757	1717.52	14.5251	6.51e-05
143	-10.391	+	NA	1.25967	+	0.714306	NA	NA	NA	0.000398059	6	-852.814	1717.63	14.64	6.15e-05
141	-9.88428	+	NA	NA	+	0.696044	NA	NA	NA	0.000312648	5	-853.876	1717.76	14.7618	5.78e-05
109	-8.7234	+	NA	NA	+	0.653699	NA	+	-0.0995342	NA	6	-853.046	1718.1	15.1056	4.87e-05
247	-4.85182	+	NA	1.9701	+	NA	1.16909	+	-0.21367	0.00276509	8	-851.287	1718.59	15.5921	3.82e-05
175	-9.1602	+	NA	1.45882	+	0.578673	NA	+	NA	0.000348866	7	-852.397	1718.8	15.8087	3.43e-05
237	-8.2295	+	NA	NA	+	0.57953	NA	+	-0.157018	0.00136023	7	-852.483	1718.98	15.9819	3.14e-05
198	-5.6988	+	-2.00656	NA	+	NA	NA	NA	-0.252647	0.0043126	6	-853.507	1719.02	16.0272	3.07e-05
200	-6.01342	+	-1.99375	1.27935	+	NA	NA	NA	-0.279988	0.00463395	7	-852.659	1719.33	16.3338	2.64e-05
173	-9.11327	+	NA	NA	+	0.614565	NA	+	NA	0.000275352	6	-853.727	1719.46	16.4669	2.47e-05
55	-5.33036	+	NA	1.74105	+	NA	1.15568	+	NA	NA	6	-853.903	1719.81	16.8187	2.07e-05
150	-7.31749	+	-1.88514	NA	+	NA	1.14881	NA	NA	0.00289217	6	-853.964	1719.94	16.9417	1.94e-05
183	-5.69215	+	NA	1.74006	+	NA	1.16095	+	NA	0.00136851	7	-853.235	1720.48	17.4851	1.48e-05
119	-4.79752	+	NA	1.82682	+	NA	1.15528	+	-0.0927099	NA	7	-853.396	1720.8	17.8069	1.26e-05
245	-4.61161	+	NA	NA	+	NA	1.18726	+	-0.179148	0.00252097	7	-853.413	1720.84	17.8416	1.24e-05
231	-4.5903	+	NA	2.02626	+	NA	NA	+	-0.214496	0.00277101	7	-853.424	1720.86	17.8636	1.23e-05
53	-5.00201	+	NA	NA	+	NA	1.17283	+	NA	NA	5	-855.432	1720.87	17.8747	1.22e-05
152	-7.64006	+	-1.86628	0.905658	+	NA	1.13709	NA	NA	0.00301074	7	-853.579	1721.17	18.1728	1.05e-05
181	-5.36038	+	NA	NA	+	NA	1.17825	+	NA	0.00135649	6	-854.811	1721.63	18.6343	8.34e-06
39	-5.07624	+	NA	1.79801	+	NA	NA	+	NA	NA	5	-855.993	1721.99	18.9971	6.96e-06
134	-7.04918	+	-1.88341	NA	+	NA	NA	NA	NA	0.00289008	5	-856.027	1722.06	19.0652	6.73e-06
117	-4.54632	+	NA	NA	+	NA	1.17343	+	-0.0767288	NA	6	-855.091	1722.19	19.1953	6.3e-06
167	-5.43709	+	NA	1.79725	+	NA	NA	+	NA	0.00136977	6	-855.344	1722.69	19.7006	4.89e-06
103	-4.53563	+	NA	1.88421	+	NA	NA	+	-0.094011	NA	6	-855.484	1722.98	19.981	4.25e-06
37	-4.73381	+	NA	NA	+	NA	NA	+	NA	NA	4	-857.582	1723.17	20.1741	3.86e-06
136	-7.3931	+	-1.86418	0.962008	+	NA	NA	NA	NA	0.00301488	6	-855.6	1723.21	20.2128	3.79e-06
229	-4.33882	+	NA	NA	+	NA	NA	+	-0.179352	0.00252345	6	-855.615	1723.24	20.2424	3.73e-06
22	-7.24812	+	-1.88989	NA	+	NA	1.1306	NA	NA	NA	5	-856.813	1723.63	20.6366	3.07e-06
165	-5.09126	+	NA	NA	+	NA	NA	+	NA	0.00135805	5	-856.981	1723.97	20.9722	2.59e-06
101	-4.27261	+	NA	NA	+	NA	NA	+	-0.077605	NA	5	-857.244	1724.49	21.4978	1.99e-06
86	-6.9022	+	-1.91611	NA	+	NA	1.13004	NA	-0.0640292	NA	6	-856.622	1725.25	22.2568	1.36e-06
24	-7.48642	+	-1.8775	0.67092	+	NA	1.12239	NA	NA	NA	6	-856.625	1725.26	22.2625	1.36e-06
6	-6.9823	+	-1.88757	NA	+	NA	NA	NA	NA	NA	4	-858.812	1725.63	22.6335	1.13e-06
213	-6.37668	+	NA	NA	+	NA	1.15298	NA	-0.21814	0.00424575	6	-857.368	1726.74	23.7482	6.47e-07
88	-7.13154	+	-1.90454	0.706748	+	NA	1.12121	NA	-0.0679646	NA	7	-856.411	1726.83	23.8381	6.18e-07
215	-6.71347	+	NA	1.38216	+	NA	1.13806	NA	-0.246417	0.00458208	7	-856.451	1726.91	23.9179	5.94e-07
8	-7.24122	+	-1.87465	0.726451	+	NA	NA	NA	NA	NA	5	-858.595	1727.2	24.2009	5.16e-07
70	-6.63105	+	-1.91375	NA	+	NA	NA	NA	-0.0649453	NA	5	-858.619	1727.24	24.2489	5.04e-07
149	-7.51744	+	NA	NA	+	NA	1.14318	NA	NA	0.00300281	5	-859.165	1728.34	25.3415	2.92e-07
72	-6.87972	+	-1.90186	0.762731	+	NA	NA	NA	-0.0691758	NA	6	-858.377	1728.76	25.7675	2.36e-07
197	-6.10968	+	NA	NA	+	NA	NA	NA	-0.218087	0.00424512	5	-859.451	1728.91	25.912	2.19e-07
199	-6.46303	+	NA	1.43592	+	NA	NA	NA	-0.247005	0.00459058	6	-858.482	1728.97	25.9771	2.12e-07
151	-7.89956	+	NA	1.09369	+	NA	1.13089	NA	NA	0.00314086	6	-858.633	1729.27	26.2796	1.82e-07
133	-7.25331	+	NA	NA	+	NA	NA	NA	NA	0.00300306	4	-861.215	1730.43	27.4385	1.02e-07
135	-7.65595	+	NA	1.14903	+	NA	NA	NA	NA	0.00314684	5	-860.64	1731.28	28.2902	6.68e-08
21	-7.45242	+	NA	NA	+	NA	1.12385	NA	NA	NA	4	-862.034	1732.07	29.0777	4.5e-08
23	-7.75143	+	NA	0.855411	+	NA	1.11471	NA	NA	NA	5	-861.747	1733.5	30.5053	2.21e-08
85	-7.25321	+	NA	NA	+	NA	1.12332	NA	-0.0375761	NA	5	-861.973	1733.95	30.9567	1.76e-08
5	-7.19059	+	NA	NA	+	NA	NA	NA	NA	NA	3	-864.017	1734.04	31.0417	1.69e-08
87	-7.53406	+	NA	0.879856	+	NA	1.11378	NA	-0.0425422	NA	6	-861.669	1735.34	32.3505	8.77e-09
7	-7.50944	+	NA	0.909663	+	NA	NA	NA	NA	NA	4	-863.698	1735.4	32.4049	8.53e-09
69	-6.98604	+	NA	NA	+	NA	NA	NA	-0.0385602	NA	4	-863.954	1735.91	32.9163	6.61e-09
71	-7.28531	+	NA	0.934658	+	NA	NA	NA	-0.0438284	NA	5	-863.616	1737.24	34.2432	3.4e-09
220	-8.56075	+	-1.76073	1.26865	NA	0.627133	2.01331	NA	-0.208478	0.00179433	8	-878.688	1773.39	70.3935	4.81e-17
90	-8.91585	+	-1.75256	NA	NA	0.714443	2.02022	NA	-0.114735	NA	6	-880.854	1773.71	70.72	4.08e-17
92	-9.35025	+	-1.72722	1.09261	NA	0.73981	2.00071	NA	-0.124229	NA	7	-879.901	1773.81	70.8164	3.89e-17
26	-9.44576	+	-1.68229	NA	NA	0.691221	2.01876	NA	NA	NA	5	-881.959	1773.92	70.9297	3.68e-17
218	-8.19562	+	-1.78334	NA	NA	0.615375	2.03352	NA	-0.182953	0.0015258	7	-879.98	1773.97	70.9755	3.59e-17
252	-7.1851	+	-1.79051	1.49571	NA	0.476832	2.03148	+	-0.209032	0.00173662	9	-877.996	1774.01	71.0132	3.53e-17
124	-7.83787	+	-1.75973	1.34156	NA	0.573584	2.0198	+	-0.128229	NA	8	-879.136	1774.28	71.289	3.07e-17
28	-9.87598	+	-1.6539	0.995742	NA	0.711954	2.00211	NA	NA	NA	6	-881.198	1774.4	71.4098	2.89e-17
122	-7.81763	+	-1.7768	NA	NA	0.597255	2.03561	+	-0.116111	NA	7	-880.485	1774.98	71.9861	2.17e-17
60	-8.40095	+	-1.68246	1.23422	NA	0.54704	2.01925	+	NA	NA	7	-880.52	1775.05	72.0549	2.09e-17
58	-8.34797	+	-1.70529	NA	NA	0.573042	2.03296	+	NA	NA	6	-881.616	1775.24	72.2456	1.9e-17
250	-7.27134	+	-1.80313	NA	NA	0.517609	2.0467	+	-0.180732	0.00146084	8	-879.692	1775.4	72.4015	1.76e-17
154	-9.37223	+	-1.67987	NA	NA	0.670886	2.02035	NA	NA	0.000273816	6	-881.924	1775.85	72.8599	1.4e-17
156	-9.7899	+	-1.65026	1.01317	NA	0.68648	2.00391	NA	NA	0.000345794	7	-881.14	1776.29	73.2954	1.13e-17
188	-8.34622	+	-1.67904	1.24566	NA	0.527958	2.02049	+	NA	0.000284304	8	-880.481	1776.97	73.979	8e-18
186	-8.30622	+	-1.70297	NA	NA	0.558622	2.03395	+	NA	0.000219507	7	-881.594	1777.2	74.2024	7.16e-18
244	-4.00869	+	-1.7927	1.79062	NA	NA	2.03912	+	-0.232037	0.00271666	8	-880.74	1777.49	74.4974	6.18e-18
242	-3.78864	+	-1.80516	NA	NA	NA	2.05407	+	-0.200174	0.00248928	7	-882.792	1779.59	76.5987	2.16e-18
52	-4.6166	+	-1.69884	1.54656	NA	NA	2.02304	+	NA	NA	6	-883.974	1779.95	76.9601	1.8e-18
25	-9.63726	+	NA	NA	NA	0.699893	1.99113	NA	NA	NA	4	-886.098	1780.2	77.2046	1.6e-18
27	-10.1194	+	NA	1.14368	NA	0.722699	1.97517	NA	NA	NA	5	-885.148	1780.3	77.3076	1.52e-18
116	-3.9785	+	-1.75208	1.64148	NA	NA	2.0243	+	-0.10909	NA	7	-883.166	1780.34	77.3469	1.49e-18
219	-8.95224	+	NA	1.40574	NA	0.640175	1.98218	NA	-0.185198	0.00172184	7	-883.246	1780.5	77.5072	1.37e-18
91	-9.69268	+	NA	1.2364	NA	0.747739	1.97217	NA	-0.106055	NA	6	-884.262	1780.53	77.5373	1.35e-18
50	-4.32233	+	-1.72249	NA	NA	NA	2.03707	+	NA	NA	5	-885.353	1780.71	77.7161	1.24e-18
180	-4.94058	+	-1.6861	1.54865	NA	NA	2.02679	+	NA	0.00120987	7	-883.364	1780.74	77.7441	1.22e-18
89	-9.21473	+	NA	NA	NA	0.719907	1.99036	NA	-0.0948315	NA	5	-885.393	1780.79	77.7973	1.19e-18
59	-8.79483	+	NA	1.35969	NA	0.574106	1.9871	+	NA	NA	6	-884.629	1781.26	78.2703	9.36e-19
123	-8.3317	+	NA	1.46145	NA	0.597497	1.98504	+	-0.109505	NA	7	-883.69	1781.39	78.3954	8.8e-19
217	-8.55697	+	NA	NA	NA	0.627587	2.00035	NA	-0.156859	0.00142738	6	-884.704	1781.42	78.4214	8.68e-19
251	-7.71564	+	NA	1.60993	NA	0.504426	1.99415	+	-0.185684	0.00167262	8	-882.737	1781.49	78.4917	8.38e-19
114	-3.74967	+	-1.76901	NA	NA	NA	2.03937	+	-0.0949426	NA	6	-884.75	1781.51	78.5124	8.3e-19
178	-4.64205	+	-1.71132	NA	NA	NA	2.04092	+	NA	0.00119744	6	-884.784	1781.57	78.5803	8.02e-19
57	-8.73986	+	NA	NA	NA	0.602982	2.00008	+	NA	NA	5	-885.882	1781.77	78.7739	7.28e-19
153	-9.54382	+	NA	NA	NA	0.67421	1.99311	NA	NA	0.000346387	5	-886.044	1782.09	79.0995	6.19e-19
155	-10.012	+	NA	1.16427	NA	0.691271	1.97745	NA	NA	0.000426722	6	-885.065	1782.14	79.1427	6.05e-19
121	-8.31531	+	NA	NA	NA	0.623496	1.99978	+	-0.0958165	NA	6	-885.167	1782.34	79.3462	5.47e-19
249	-7.81101	+	NA	NA	NA	0.548291	2.00816	+	-0.155072	0.00137678	7	-884.534	1783.08	80.0839	3.78e-19
187	-8.72217	+	NA	1.37407	NA	0.549029	1.98885	+	NA	0.000374323	7	-884.565	1783.14	80.1457	3.67e-19
185	-8.68181	+	NA	NA	NA	0.583062	2.00154	+	NA	0.000304092	6	-885.841	1783.69	80.6949	2.79e-19
243	-4.36217	+	NA	1.92279	NA	NA	1.99691	+	-0.209979	0.00271385	7	-885.48	1784.97	81.9753	1.47e-19
204	-8.1071	+	-1.72585	1.35694	NA	0.635372	NA	NA	-0.208902	0.00176824	7	-885.511	1785.03	82.0379	1.42e-19
76	-8.87996	+	-1.6949	1.18374	NA	0.746016	NA	NA	-0.12682	NA	6	-886.641	1785.29	82.2948	1.25e-19
74	-8.4107	+	-1.71939	NA	NA	0.718989	NA	NA	-0.116432	NA	5	-887.719	1785.44	82.4485	1.16e-19
10	-8.9511	+	-1.65047	NA	NA	0.695665	NA	NA	NA	NA	4	-888.812	1785.63	82.6334	1.06e-19
202	-7.71492	+	-1.74696	NA	NA	0.622901	NA	NA	-0.181833	0.00148491	6	-886.931	1785.87	82.8755	9.36e-20
236	-6.81269	+	-1.74988	1.57068	NA	0.494119	NA	+	-0.209559	0.00171646	8	-884.929	1785.87	82.8768	9.36e-20
12	-9.41816	+	-1.62213	1.08419	NA	0.717732	NA	NA	NA	NA	5	-887.945	1785.89	82.9005	9.25e-20
108	-7.45451	+	-1.72139	1.41883	NA	0.589577	NA	+	-0.130624	NA	7	-885.991	1785.99	82.9975	8.81e-20
51	-4.83129	+	NA	1.69479	NA	NA	1.98562	+	NA	NA	5	-888.163	1786.33	83.3374	7.43e-20
44	-8.0279	+	-1.64539	1.30947	NA	0.562473	NA	+	NA	NA	6	-887.369	1786.75	83.7514	6.04e-20
210	-5.55922	+	-1.72569	NA	NA	NA	2.00775	NA	-0.23874	0.0042086	6	-887.396	1786.8	83.8044	5.89e-20
106	-7.43174	+	-1.73793	NA	NA	0.614701	NA	+	-0.11766	NA	6	-887.441	1786.89	83.8944	5.63e-20
179	-5.18641	+	NA	1.6942	NA	NA	1.99081	+	NA	0.00134037	6	-887.474	1786.96	83.9615	5.44e-20
42	-7.97055	+	-1.6682	NA	NA	0.59027	NA	+	NA	NA	5	-888.552	1787.11	84.1148	5.04e-20
212	-5.85549	+	-1.70773	1.20605	NA	NA	1.99453	NA	-0.264462	0.00451344	7	-886.607	1787.22	84.2284	4.76e-20
241	-4.12559	+	NA	NA	NA	NA	2.01009	+	-0.176354	0.00247546	6	-887.628	1787.26	84.2686	4.67e-20
115	-4.31359	+	NA	1.7791	NA	NA	1.98439	+	-0.0900734	NA	6	-887.655	1787.32	84.3221	4.54e-20
49	-4.51084	+	NA	NA	NA	NA	1.99822	+	NA	NA	4	-889.7	1787.4	84.41	4.35e-20
234	-6.89998	+	-1.76176	NA	NA	0.536798	NA	+	-0.179976	0.00142932	7	-886.72	1787.45	84.4546	4.25e-20
138	-8.88662	+	-1.64832	NA	NA	0.677812	NA	NA	NA	0.000241754	5	-888.786	1787.58	84.5821	3.99e-20
140	-9.33925	+	-1.61886	1.10014	NA	0.694366	NA	NA	NA	0.000318898	6	-887.898	1787.8	84.8079	3.56e-20
177	-4.86252	+	NA	NA	NA	NA	2.00342	+	NA	0.00132872	5	-889.06	1788.13	85.1317	3.03e-20
172	-7.97742	+	-1.64237	1.32017	NA	0.5449	NA	+	NA	0.000262356	7	-887.338	1788.68	85.6903	2.29e-20
113	-4.06737	+	NA	NA	NA	NA	1.99793	+	-0.0746217	NA	5	-889.358	1788.72	85.7272	2.25e-20
170	-7.93408	+	-1.6662	NA	NA	0.577619	NA	+	NA	0.000194052	6	-888.535	1789.08	86.0831	1.88e-20
228	-3.52441	+	-1.7472	1.87646	NA	NA	NA	+	-0.233106	0.00273252	7	-887.716	1789.44	86.4469	1.57e-20
146	-6.82326	+	-1.62846	NA	NA	NA	1.99509	NA	NA	0.00285767	5	-889.77	1789.54	86.5502	1.49e-20
148	-7.1432	+	-1.60841	0.899061	NA	NA	1.98499	NA	NA	0.00297488	6	-889.373	1790.75	87.7591	8.15e-21
11	-9.66726	+	NA	1.22704	NA	0.72871	NA	NA	NA	NA	4	-891.716	1791.43	88.4408	5.79e-21
9	-9.15126	+	NA	NA	NA	0.704715	NA	NA	NA	NA	3	-892.764	1791.53	88.5354	5.53e-21
75	-9.22568	+	NA	1.32255	NA	0.75434	NA	NA	-0.109328	NA	5	-890.81	1791.63	88.6314	5.27e-21
36	-4.13965	+	-1.65664	1.63369	NA	NA	NA	+	NA	NA	5	-890.839	1791.68	88.6893	5.12e-21
203	-8.49729	+	NA	1.4893	NA	0.648245	NA	NA	-0.186827	0.00170386	6	-889.858	1791.72	88.7279	5.02e-21
226	-3.29072	+	-1.75844	NA	NA	NA	NA	+	-0.200114	0.00249848	6	-889.858	1791.72	88.7295	5.02e-21
100	-3.49005	+	-1.70835	1.72943	NA	NA	NA	+	-0.111007	NA	6	-890.04	1792.09	89.0937	4.18e-21
73	-8.71555	+	NA	NA	NA	0.724977	NA	NA	-0.0972509	NA	4	-892.054	1792.11	89.1176	4.13e-21
164	-4.4648	+	-1.64487	1.6357	NA	NA	NA	+	NA	0.00121963	6	-890.255	1792.52	89.5238	3.37e-21
43	-8.40598	+	NA	1.43284	NA	0.587354	NA	+	NA	NA	5	-891.267	1792.54	89.5443	3.34e-21
34	-3.82636	+	-1.67967	NA	NA	NA	NA	+	NA	NA	4	-892.305	1792.61	89.6191	3.21e-21
107	-7.92907	+	NA	1.53694	NA	0.611387	NA	+	-0.112646	NA	6	-890.314	1792.64	89.6416	3.18e-21
235	-7.3207	+	NA	1.68351	NA	0.519224	NA	+	-0.187428	0.001659	7	-889.42	1792.85	89.8544	2.86e-21
201	-8.07633	+	NA	NA	NA	0.634928	NA	NA	-0.157112	0.00139615	5	-891.428	1792.86	89.8662	2.84e-21
41	-8.34651	+	NA	NA	NA	0.617917	NA	+	NA	NA	4	-892.599	1793.2	90.2068	2.4e-21
139	-9.56727	+	NA	1.24652	NA	0.699421	NA	NA	NA	0.000399215	5	-891.646	1793.3	90.3034	2.28e-21
18	-6.75653	+	-1.63367	NA	NA	NA	1.9769	NA	NA	NA	4	-892.683	1793.37	90.3748	2.2e-21
209	-5.8594	+	NA	NA	NA	NA	1.97309	NA	-0.214995	0.00417264	5	-891.702	1793.41	90.4155	2.16e-21
98	-3.24626	+	-1.72434	NA	NA	NA	NA	+	-0.0961239	NA	5	-891.717	1793.44	90.4458	2.13e-21
137	-9.06699	+	NA	NA	NA	0.681526	NA	NA	NA	0.00031448	4	-892.722	1793.45	90.4536	2.12e-21
162	-4.14735	+	-1.66942	NA	NA	NA	NA	+	NA	0.00120751	5	-891.762	1793.53	90.5347	2.03e-21
211	-6.18639	+	NA	1.3422	NA	NA	1.9609	NA	-0.242761	0.00450149	6	-890.791	1793.59	90.595	1.97e-21
105	-7.90983	+	NA	NA	NA	0.638731	NA	+	-0.0981448	NA	5	-891.882	1793.77	90.774	1.8e-21
171	-8.3381	+	NA	1.44641	NA	0.563943	NA	+	NA	0.000350553	6	-891.214	1794.44	91.4408	1.29e-21
233	-7.41631	+	NA	NA	NA	0.564833	NA	+	-0.155632	0.00135316	6	-891.302	1794.61	91.6169	1.18e-21
20	-6.99289	+	-1.62061	0.665912	NA	NA	1.9698	NA	NA	NA	5	-892.49	1794.99	91.9914	9.82e-22
145	-6.98068	+	NA	NA	NA	NA	1.96591	NA	NA	0.00294537	4	-893.537	1795.08	92.0835	9.37e-22
82	-6.46463	+	-1.65195	NA	NA	NA	1.97642	NA	-0.0542977	NA	5	-892.54	1795.09	92.0912	9.34e-22
169	-8.2938	+	NA	NA	NA	0.599837	NA	+	NA	0.000277174	5	-892.567	1795.14	92.1449	9.09e-22
147	-7.34901	+	NA	1.05291	NA	NA	1.95593	NA	NA	0.0030783	5	-893.016	1796.04	93.0426	5.8e-22
227	-3.87168	+	NA	2.00447	NA	NA	NA	+	-0.212185	0.00273073	6	-892.176	1796.36	93.3655	4.94e-22
84	-6.69118	+	-1.63953	0.69751	NA	NA	1.96885	NA	-0.0581694	NA	6	-892.328	1796.66	93.6685	4.24e-22
35	-4.35376	+	NA	1.77713	NA	NA	NA	+	NA	NA	4	-894.786	1797.58	94.5812	2.69e-22
163	-4.70839	+	NA	1.77669	NA	NA	NA	+	NA	0.00134413	5	-894.131	1798.27	95.273	1.9e-22
194	-5.0573	+	-1.68615	NA	NA	NA	NA	NA	-0.237996	0.00420188	5	-894.17	1798.35	95.351	1.83e-22
99	-3.81982	+	NA	1.86273	NA	NA	NA	+	-0.0928504	NA	5	-894.269	1798.54	95.5485	1.66e-22
196	-5.37745	+	-1.66885	1.29077	NA	NA	NA	NA	-0.264835	0.00452097	6	-893.298	1798.6	95.6088	1.61e-22
33	-4.01556	+	NA	NA	NA	NA	NA	+	NA	NA	3	-896.399	1798.8	95.8055	1.46e-22
225	-3.62195	+	NA	NA	NA	NA	NA	+	-0.17764	0.00248705	5	-894.402	1798.81	95.8152	1.45e-22
17	-6.91691	+	NA	NA	NA	NA	1.9466	NA	NA	NA	3	-896.471	1798.94	95.9507	1.36e-22
161	-4.36682	+	NA	NA	NA	NA	NA	+	NA	0.0013328	4	-895.793	1799.59	96.5946	9.83e-23
97	-3.5593	+	NA	NA	NA	NA	NA	+	-0.076751	NA	4	-896.054	1800.11	97.1173	7.57e-23
19	-7.20272	+	NA	0.817004	NA	NA	1.93914	NA	NA	NA	4	-896.195	1800.39	97.3998	6.57e-23
81	-6.72751	+	NA	NA	NA	NA	1.94574	NA	-0.0357783	NA	4	-896.413	1800.83	97.8346	5.29e-23
130	-6.32178	+	-1.59348	NA	NA	NA	NA	NA	NA	0.0028561	4	-896.46	1800.92	97.9293	5.04e-23
132	-6.67319	+	-1.57305	0.987175	NA	NA	NA	NA	NA	0.00298306	5	-895.999	1802	99.0084	2.94e-23
83	-6.99613	+	NA	0.840622	NA	NA	1.93791	NA	-0.0405356	NA	5	-896.12	1802.25	99.2514	2.6e-23
193	-5.35675	+	NA	NA	NA	NA	NA	NA	-0.215718	0.00417449	4	-898.249	1804.5	101.508	8.42e-24
2	-6.2564	+	-1.59781	NA	NA	NA	NA	NA	NA	NA	3	-899.256	1804.51	101.519	8.38e-24
195	-5.70635	+	NA	1.42153	NA	NA	NA	NA	-0.244379	0.00451622	5	-897.264	1804.53	101.538	8.3e-24
4	-6.5239	+	-1.58403	0.753381	NA	NA	NA	NA	NA	NA	4	-899.017	1806.04	103.042	3.91e-24
129	-6.48532	+	NA	NA	NA	NA	NA	NA	NA	0.00294432	3	-900.039	1806.08	103.086	3.83e-24
66	-5.95612	+	-1.61569	NA	NA	NA	NA	NA	-0.0557703	NA	4	-899.11	1806.22	103.229	3.56e-24
131	-6.88232	+	NA	1.13467	NA	NA	NA	NA	NA	0.00308583	4	-899.456	1806.92	103.921	2.52e-24
68	-6.21146	+	-1.60273	0.785766	NA	NA	NA	NA	-0.0601325	NA	5	-898.848	1807.7	104.707	1.7e-24
1	-6.42257	+	NA	NA	NA	NA	NA	NA	NA	NA	2	-902.852	1809.7	106.71	6.25e-25
3	-6.73666	+	NA	0.897747	NA	NA	NA	NA	NA	NA	3	-902.529	1811.06	108.065	3.17e-25
65	-6.22032	+	NA	NA	NA	NA	NA	NA	-0.0381559	NA	3	-902.787	1811.58	108.582	2.45e-25
67	-6.51523	+	NA	0.922663	NA	NA	NA	NA	-0.0433675	NA	4	-902.445	1812.89	109.9	1.27e-25

## Sheet: Carnivores
	cond((Int))	disp((Int))	cond(All_Livestock_1)	cond(Antelopes_all_1)	cond(Dist_Road_K)	cond(Fencing_2)	cond(Height_meters)	cond(ndvi)	cond(Underpass_type)	cond(Water_source)	cond(Width_meters)	df	logLik	AICc	delta	weight
27	-9.50811	+	NA	1.31385	NA	0.5098	0.614223	NA	NA	NA	NA	5	-520.621	1051.25	0	0.095307
91	-10.5265	+	NA	1.31388	NA	+	0.721602	NA	+	NA	NA	6	-520.257	1052.52	1.27409	0.0504034		Family: binomial ( logit )
28	-9.36314	+	-0.532853	1.30379	NA	+	0.601268	NA	NA	NA	NA	6	-520.28	1052.57	1.32021	0.0492544		Formula: All_carnivores_1 ~ ndvi + Dist_Road_K + Fencing_2 + Water_source +
283	-9.69173	+	NA	1.31807	NA	+	0.664896	NA	NA	NA	-0.000700272	6	-520.36	1052.73	1.48017	0.0454685		Underpass_type + All_Livestock_1 + Antelopes_all_1 + Width_meters +
59	-9.42139	+	NA	1.29772	NA	+	0.618986	-0.497946	NA	NA	NA	6	-520.467	1052.94	1.69435	0.0408509		Height_meters + (1 | Unique_ID)
31	-9.40379	+	NA	1.31457	-0.299376	+	0.611295	NA	NA	NA	NA	6	-520.572	1053.15	1.90487	0.0367696		Data: nomitdata
155	-9.52441	+	NA	1.31373	NA	+	0.612521	NA	NA	0.00485789	NA	6	-520.619	1053.25	1.99789	0.0350986
92	-10.3089	+	-0.495803	1.30444	NA	+	0.700732	NA	+	NA	NA	7	-519.964	1053.94	2.6896	0.0248362		AIC BIC logLik deviance df.resid
284	-9.54474	+	-0.548141	1.30787	NA	+	0.652217	NA	NA	NA	-0.000709905	7	-519.998	1054	2.75776	0.0240041		1060.5 1141.7 -519.2 1038.5 11899
347	-10.6448	+	NA	1.31787	NA	+	0.762774	NA	+	NA	-0.000638258	7	-520.027	1054.06	2.81625	0.0233122
123	-10.4667	+	NA	1.29693	NA	+	0.730043	-0.528312	+	NA	NA	7	-520.084	1054.18	2.93042	0.0220187		Random effects:
95	-10.516	+	NA	1.31545	-0.538991	+	0.735135	NA	+	NA	NA	7	-520.106	1054.22	2.97327	0.021552
60	-9.27313	+	-0.536018	1.28755	NA	+	0.605812	-0.502981	NA	NA	NA	7	-520.123	1054.25	3.00781	0.021183		Conditional model:
315	-9.60606	+	NA	1.30171	NA	+	0.670517	-0.50568	NA	NA	-0.000712419	7	-520.201	1054.41	3.16516	0.0195803		Groups Name Variance Std.Dev.
32	-9.23626	+	-0.54869	1.30443	-0.349315	+	0.597373	NA	NA	NA	NA	7	-520.211	1054.43	3.18428	0.019394		Unique_ID (Intercept) 2.157 1.469
411	-9.9308	+	NA	1.319	NA	+	0.671604	NA	NA	0.0463719	-0.00101348	7	-520.22	1054.45	3.20209	0.019222		Number of obs: 11910, groups: Unique_ID, 72
219	-10.5972	+	NA	1.31356	NA	+	0.719722	NA	+	0.013172	NA	7	-520.241	1054.49	3.2448	0.018816
156	-9.3474	+	-0.5379	1.3038	NA	+	0.602575	NA	NA	-0.00419269	NA	7	-520.279	1054.57	3.3194	0.018127		Conditional model:
287	-9.57593	+	NA	1.31913	-0.352672	+	0.663464	NA	NA	NA	-0.000729229	7	-520.293	1054.6	3.34843	0.0178658			Estimate	Std. Error	z value	Pr(>|z|)
63	-9.32667	+	NA	1.29871	-0.278765	+	0.616209	-0.486891	NA	NA	NA	7	-520.426	1054.86	3.6136	0.0156474		(Intercept)	-10.6439	1.68969	-6.299	2.99e-10	***
187	-9.43395	+	NA	1.29766	NA	+	0.6177	-0.49665	NA	0.00365741	NA	7	-520.466	1054.94	3.6944	0.0150279		ndvi	-0.509805	0.912737	-0.559	0.576472
159	-9.41432	+	NA	1.31449	-0.295758	+	0.610361	NA	NA	0.00276538	NA	7	-520.572	1055.15	3.9059	0.0135198		Dist_Road_K	-0.5678	0.970626	-0.585	0.558559
348	-10.4217	+	-0.511846	1.3083	NA	+	0.742007	NA	+	NA	-0.000652279	8	-519.713	1055.44	4.19106	0.0117232		Fencing_2Y	0.548344	0.210838	2.601	0.009301	**
19	-9.18637	+	NA	1.46002	NA	NA	0.603257	NA	NA	NA	NA	4	-523.783	1055.57	4.3229	0.0109754		Water_source	0.040402	0.085602	0.472	0.63694
96	-10.2897	+	-0.516041	1.30585	-0.572255	+	0.714298	NA	+	NA	NA	8	-519.786	1055.58	4.33665	0.0109002		Underpass_typeCulvert	0.839384	0.859831	0.976	0.328956
124	-10.2466	+	-0.499167	1.28736	NA	+	0.709027	-0.533392	+	NA	NA	8	-519.787	1055.59	4.33884	0.0108882		All_Livestock_1	-0.487695	0.681951	-0.715	0.474518
475	-11.0132	+	NA	1.31915	NA	+	0.779308	NA	+	0.0549677	-0.00100381	8	-519.822	1055.66	4.40961	0.0105097		Antelopes_all_1	1.29531	0.243441	5.321	1.03e-07	***
316	-9.45539	+	-0.551704	1.29139	NA	+	0.657603	-0.511649	NA	NA	-0.00072218	8	-519.835	1055.68	4.4347	0.0103787		Width_meters	-0.000966	0.001081	-0.894	0.371421
351	-10.6402	+	NA	1.31995	-0.587212	+	0.779896	NA	+	NA	-0.000675054	8	-519.849	1055.71	4.46209	0.0102375		Height_meters	0.780616	0.210167	3.714	0.000204	***
379	-10.5859	+	NA	1.30073	NA	+	0.771968	-0.535144	+	NA	-0.000648754	8	-519.849	1055.71	4.46391	0.0102282		---
288	-9.40548	+	-0.567282	1.30889	-0.405711	+	0.650029	NA	NA	NA	-0.000743473	8	-519.905	1055.82	4.57447	0.00967812		Signif. codes: 0 ‘***’ 0.001 ‘**’ 0.01 ‘*’ 0.05 ‘.’ 0.1 ‘ ’ 1
412	-9.73941	+	-0.510336	1.30932	NA	+	0.658523	NA	NA	0.0353198	-0.000947972	8	-519.915	1055.84	4.59461	0.00958116
127	-10.4588	+	NA	1.29894	-0.521266	+	0.742891	-0.51095	+	NA	NA	8	-519.944	1055.9	4.6527	0.00930686
220	-10.3332	+	-0.490251	1.30445	NA	+	0.700408	NA	+	0.00404816	NA	8	-519.962	1055.94	4.68927	0.00913826
64	-9.15706	+	-0.550435	1.28855	-0.328281	+	0.602103	-0.489096	NA	NA	NA	8	-520.063	1056.14	4.88993	0.00826589		Family: binomial ( logit )
443	-9.84206	+	NA	1.30294	NA	+	0.676962	-0.49208	NA	0.0452351	-0.00101762	8	-520.07	1056.15	4.90442	0.00820624		Formula: All_carnivores_1 ~ Fencing_2 + Antelopes_all_1 + Height_meters + (1 | Unique_ID)
251	-10.5323	+	NA	1.29673	NA	+	0.728265	-0.524526	+	0.0121279	NA	8	-520.071	1056.15	4.9066	0.00819731		Data: nomitdata
223	-10.5726	+	NA	1.31512	-0.525773	+	0.733309	NA	+	0.0104811	NA	8	-520.096	1056.2	4.95611	0.00799684
188	-9.25198	+	-0.542611	1.2875	NA	+	0.607534	-0.50499	NA	-0.0055094	NA	8	-520.12	1056.25	5.00511	0.0078033		AIC BIC logLik deviance df.resid
319	-9.49993	+	NA	1.30309	-0.331863	+	0.669089	-0.492492	NA	NA	-0.000739213	8	-520.143	1056.3	5.05069	0.00762748		1051.2 1088.2 -520.6 1041.2 11905
415	-9.81874	+	NA	1.31983	-0.312683	+	0.67003	NA	NA	0.0446357	-0.00102732	8	-520.165	1056.34	5.09414	0.00746358
160	-9.20598	+	-0.557527	1.30449	-0.359567	+	0.599474	NA	NA	-0.00709269	NA	8	-520.207	1056.43	5.17809	0.00715677		Random effects:
83	-10.1968	+	NA	1.46019	NA	NA	0.709761	NA	+	NA	NA	5	-523.421	1056.85	5.60013	0.00579524
191	-9.3334	+	NA	1.29867	-0.276555	+	0.615619	-0.486383	NA	0.0017422	NA	8	-520.425	1056.86	5.61577	0.00575009		Conditional model:
352	-10.4075	+	-0.534641	1.31023	-0.622812	+	0.759271	NA	+	NA	-0.000691889	9	-519.504	1057.02	5.77553	0.00530865		Groups Name Variance Std.Dev.
275	-9.36965	+	NA	1.4639	NA	NA	0.653826	NA	NA	NA	-0.000698509	5	-523.52	1057.05	5.79862	0.00524771		Unique_ID (Intercept) 2.521 1.588
380	-10.36	+	-0.515515	1.29101	NA	+	0.751053	-0.540922	+	NA	-0.000662925	9	-519.531	1057.08	5.83058	0.00516453		Number of obs: 11910, groups: Unique_ID, 72
476	-10.7415	+	-0.457731	1.31035	NA	+	0.757627	NA	+	0.0440924	-0.000944447	9	-519.581	1057.18	5.92953	0.00491524
20	-9.0814	+	-0.364722	1.45637	NA	NA	0.594073	NA	NA	NA	NA	5	-523.624	1057.25	6.00515	0.00473285		Conditional model:
128	-10.2307	+	-0.518263	1.28929	-0.554329	+	0.721933	-0.514156	+	NA	NA	9	-519.622	1057.26	6.01166	0.00471748			Estimate	Std. Error	z value	Pr(>|z|)
507	-10.9494	+	NA	1.30231	NA	+	0.787981	-0.520782	+	0.0539779	-0.00100746	9	-519.654	1057.32	6.07641	0.00456719		(Intercept)	-9.5081	0.9512	-9.996	< 2e-16	***
479	-10.9961	+	NA	1.32089	-0.542136	+	0.794524	NA	+	0.0530248	-0.00102463	9	-519.659	1057.33	6.08563	0.00454618		Fencing_2Y	0.5098	0.2053	2.483	0.013	*
383	-10.5838	+	NA	1.30328	-0.569369	+	0.788282	-0.516249	+	NA	-0.00068407	9	-519.684	1057.38	6.13509	0.00443514		Antelopes_all_1	1.3139	0.2412	5.447	5.11e-08	***
23	-9.07904	+	NA	1.46084	-0.307931	NA	0.600233	NA	NA	NA	NA	5	-523.732	1057.47	6.22099	0.00424869		Height_meters	0.6142	0.1513	4.06	4.9e-05	***
320	-9.32705	+	-0.569226	1.29282	-0.384434	+	0.655438	-0.495285	NA	NA	-0.000753546	9	-519.752	1057.52	6.27284	0.00413995		---
444	-9.64525	+	-0.515522	1.293	NA	+	0.663627	-0.50103	NA	0.0340333	-0.000951375	9	-519.759	1057.53	6.28553	0.00411377		Signif. codes: 0 ‘***’ 0.001 ‘**’ 0.01 ‘*’ 0.05 ‘.’ 0.1 ‘ ’ 1
147	-9.20397	+	NA	1.45992	NA	NA	0.601406	NA	NA	0.00525653	NA	5	-523.781	1057.57	6.31969	0.0040441
51	-9.18474	+	NA	1.45989	NA	NA	0.603324	-0.00800165	NA	NA	NA	5	-523.783	1057.57	6.3245	0.00403438
224	-10.2937	+	-0.515121	1.30585	-0.571358	+	0.714221	NA	+	0.000657676	NA	9	-519.786	1057.59	6.3396	0.00400405
252	-10.2641	+	-0.495219	1.28738	NA	+	0.708791	-0.532448	+	0.0028919	NA	9	-519.786	1057.59	6.34034	0.00400255
416	-9.59696	+	-0.531403	1.31004	-0.372582	+	0.656002	NA	NA	0.0327868	-0.000961802	9	-519.834	1057.68	6.43617	0.0038153
255	-10.5108	+	NA	1.29871	-0.509504	+	0.741205	-0.508293	+	0.00956984	NA	9	-519.936	1057.89	6.63937	0.0034467
447	-9.73937	+	NA	1.30405	-0.294151	+	0.675436	-0.480743	NA	0.043644	-0.00103064	9	-520.022	1058.06	6.81098	0.00316329
192	-9.12163	+	-0.56058	1.28855	-0.339771	+	0.604536	-0.491572	NA	-0.00818928	NA	9	-520.057	1058.13	6.88127	0.00305406
339	-10.3149	+	NA	1.46388	NA	NA	0.750853	NA	+	NA	-0.000636679	6	-523.189	1058.39	7.13828	0.00268577
87	-10.1866	+	NA	1.46196	-0.54815	NA	0.723539	NA	+	NA	NA	6	-523.263	1058.53	7.28642	0.00249401
84	-10.0517	+	-0.331367	1.45678	NA	NA	0.696091	NA	+	NA	NA	6	-523.29	1058.59	7.34005	0.00242803
384	-10.3491	+	-0.53712	1.29349	-0.604718	+	0.767524	-0.519991	+	NA	-0.000700925	10	-519.336	1058.69	7.44333	0.00230583
276	-9.26178	+	-0.378931	1.46022	NA	NA	0.644659	NA	NA	NA	-0.000703879	6	-523.347	1058.7	7.45427	0.00229325
403	-9.61154	+	NA	1.46494	NA	NA	0.660577	NA	NA	0.0469157	-0.00101567	6	-523.375	1058.76	7.51035	0.00222984
480	-10.7084	+	-0.483612	1.31188	-0.583846	+	0.772813	NA	+	0.0413964	-0.000963568	10	-519.387	1058.79	7.5462	0.00219023
211	-10.2696	+	NA	1.45994	NA	NA	0.707823	NA	+	0.0135428	NA	6	-523.404	1058.82	7.56831	0.00216614
508	-10.6728	+	-0.463118	1.29325	NA	+	0.766079	-0.529101	+	0.0429541	-0.000947376	10	-519.407	1058.83	7.58525	0.00214788
115	-10.1916	+	NA	1.45964	NA	NA	0.710318	-0.0373376	+	NA	NA	6	-523.42	1058.85	7.60034	0.00213173
279	-9.25103	+	NA	1.46508	-0.361775	NA	0.652379	NA	NA	NA	-0.000728169	6	-523.449	1058.91	7.65837	0.00207076
511	-10.9352	+	NA	1.30449	-0.52634	+	0.802499	-0.503262	+	0.0521328	-0.0010275	10	-519.502	1059.02	7.7754	0.00195307
307	-9.36645	+	NA	1.46366	NA	NA	0.653992	-0.0162511	NA	NA	-0.000698874	6	-523.52	1059.05	7.8003	0.00192891
24	-8.95656	+	-0.380821	1.4572	-0.343193	NA	0.590231	NA	NA	NA	NA	6	-523.557	1059.12	7.87482	0.00185835
148	-9.08003	+	-0.365131	1.45638	NA	NA	0.59419	NA	NA	-0.00036863	NA	6	-523.624	1059.25	8.00714	0.00173938
52	-9.08159	+	-0.364734	1.45639	NA	NA	0.594064	0.000931755	NA	NA	NA	6	-523.624	1059.25	8.00717	0.00173937
256	-10.2286	+	-0.51873	1.28929	-0.554772	+	0.721972	-0.51425	+	-0.000336554	NA	10	-519.622	1059.26	8.015	0.00173257
448	-9.51373	+	-0.534834	1.29413	-0.353482	+	0.661169	-0.486679	NA	0.0317055	-0.000964567	10	-519.687	1059.39	8.14555	0.00162308
151	-9.09074	+	NA	1.46076	-0.303818	NA	0.599191	NA	NA	0.0030715	NA	6	-523.731	1059.47	8.22136	0.00156271
55	-9.07962	+	NA	1.46089	-0.308039	NA	0.600204	0.00306996	NA	NA	NA	6	-523.732	1059.47	8.22299	0.00156144
179	-9.20267	+	NA	1.45982	NA	NA	0.601465	-0.00615634	NA	0.0052412	NA	6	-523.781	1059.57	8.32166	0.00148628
467	-10.687	+	NA	1.46528	NA	NA	0.767519	NA	+	0.0554923	-0.00100577	7	-522.978	1059.97	8.71887	0.00121856
343	-10.3105	+	NA	1.46615	-0.597178	NA	0.768284	NA	+	NA	-0.000674366	7	-523.004	1060.02	8.76924	0.00118825
340	-10.1639	+	-0.346106	1.46043	NA	NA	0.737	NA	+	NA	-0.00064479	7	-523.046	1060.1	8.85352	0.00113922
88	-10.0318	+	-0.353486	1.45849	-0.572717	NA	0.709601	NA	+	NA	NA	7	-523.113	1060.24	8.98901	0.0010646
371	-10.3087	+	NA	1.46322	NA	NA	0.75157	-0.0446239	+	NA	-0.000637575	7	-523.188	1060.39	9.13805	0.000988151
512	-10.6439	+	-0.487695	1.29531	-0.5678	+	0.780616	-0.509805	+	0.0404024	-0.000965951	11	-519.226	1060.47	9.22749	0.000944931
404	-9.48186	+	-0.339391	1.46146	NA	NA	0.651621	NA	NA	0.04014	-0.000974663	7	-523.24	1060.49	9.24221	0.000938006
215	-10.2446	+	NA	1.46167	-0.534253	NA	0.721651	NA	+	0.0107518	NA	7	-523.253	1060.51	9.26765	0.000926148
280	-9.12444	+	-0.398341	1.46144	-0.399621	NA	0.642488	NA	NA	NA	-0.000736978	7	-523.258	1060.52	9.2778	0.000921457
119	-10.1836	+	NA	1.46163	-0.547493	NA	0.72384	-0.0212758	+	NA	NA	7	-523.263	1060.54	9.28819	0.000916686
212	-10.0997	+	-0.321175	1.45672	NA	NA	0.695384	NA	+	0.00807317	NA	7	-523.284	1060.58	9.33034	0.000897567
116	-10.0477	+	-0.330998	1.45634	NA	NA	0.696549	-0.0297554	+	NA	NA	7	-523.29	1060.59	9.34125	0.000892685
407	-9.49654	+	NA	1.46587	-0.32032	NA	0.658964	NA	NA	0.0450922	-0.00102926	7	-523.317	1060.64	9.39555	0.000868777
308	-9.26034	+	-0.378827	1.46012	NA	NA	0.644731	-0.00734194	NA	NA	-0.000704101	7	-523.347	1060.7	9.45655	0.000842676
435	-9.6111	+	NA	1.4649	NA	NA	0.660607	-0.0022195	NA	0.0469106	-0.00101556	7	-523.375	1060.76	9.51269	0.000819351
243	-10.2645	+	NA	1.45945	NA	NA	0.708326	-0.0330763	+	0.0134738	NA	7	-523.404	1060.82	9.56925	0.000796506
311	-9.25045	+	NA	1.46503	-0.361654	NA	0.652415	-0.00321281	NA	NA	-0.000728347	7	-523.449	1060.91	9.66071	0.0007609
152	-8.94301	+	-0.384493	1.45725	-0.347876	NA	0.59119	NA	NA	-0.0031868	NA	7	-523.557	1061.12	9.87539	0.000683458
56	-8.95923	+	-0.381034	1.45742	-0.343787	NA	0.590101	0.0144029	NA	NA	NA	7	-523.557	1061.12	9.87691	0.000682938
180	-9.0802	+	-0.365139	1.45639	NA	NA	0.594182	0.000831565	NA	-0.000366495	NA	7	-523.624	1061.26	10.0095	0.000639132
183	-9.09154	+	NA	1.46082	-0.303965	NA	0.599152	0.00403004	NA	0.00308042	NA	7	-523.731	1061.47	10.2237	0.00057422
471	-10.6696	+	NA	1.46721	-0.550168	NA	0.782965	NA	+	0.0534547	-0.00102679	8	-522.809	1061.63	10.382	0.000530513
344	-10.1492	+	-0.370924	1.46266	-0.62357	NA	0.75424	NA	+	NA	-0.000684548	8	-522.838	1061.69	10.4402	0.000515303
468	-10.5185	+	-0.290403	1.46216	NA	NA	0.754108	NA	+	0.0491339	-0.000970583	8	-522.881	1061.77	10.5265	0.000493553
499	-10.6824	+	NA	1.46483	NA	NA	0.767987	-0.0300386	+	0.0554357	-0.00100606	8	-522.978	1061.97	10.7204	0.000447941
375	-10.3067	+	NA	1.46574	-0.596287	NA	0.768698	-0.027267	+	NA	-0.000674879	8	-523.003	1062.02	10.771	0.000436756
372	-10.159	+	-0.345704	1.45989	NA	NA	0.737619	-0.0369091	+	NA	-0.000645541	8	-523.045	1062.1	10.8544	0.000418902
216	-10.0598	+	-0.347487	1.45841	-0.566202	NA	0.709037	NA	+	0.00466111	NA	8	-523.111	1062.23	10.9877	0.000391898
120	-10.0302	+	-0.35332	1.45831	-0.572319	NA	0.709776	-0.0119183	+	NA	NA	8	-523.113	1062.24	10.9915	0.000391154
408	-9.34363	+	-0.360203	1.46238	-0.360847	NA	0.649165	NA	NA	0.0376691	-0.000987814	8	-523.164	1062.34	11.0938	0.000371646
436	-9.48255	+	-0.339374	1.46151	NA	NA	0.651582	0.00350755	NA	0.0401419	-0.000974751	8	-523.24	1062.49	11.2449	0.000344612
247	-10.2419	+	NA	1.4614	-0.533732	NA	0.72192	-0.0182462	+	0.0107171	NA	8	-523.252	1062.52	11.2699	0.000340326
312	-9.12595	+	-0.398429	1.46157	-0.39988	NA	0.642398	0.008393	NA	NA	-0.000736717	8	-523.258	1062.53	11.2804	0.000338545
244	-10.0957	+	-0.320916	1.45632	NA	NA	0.695812	-0.0275193	+	0.00802006	NA	8	-523.284	1062.58	11.332	0.000329915
439	-9.49824	+	NA	1.46601	-0.320574	NA	0.658867	0.00893417	NA	0.0451051	-0.00102925	8	-523.317	1062.65	11.3981	0.000319192
184	-8.94567	+	-0.384676	1.45746	-0.348388	NA	0.591063	0.01358	NA	-0.0031601	NA	8	-523.556	1063.13	11.8778	0.000251122
472	-10.4845	+	-0.317969	1.464	-0.578579	NA	0.769083	NA	+	0.046388	-0.000989115	9	-522.691	1063.4	12.1499	0.000219185
503	-10.6676	+	NA	1.467	-0.549802	NA	0.78318	-0.0140724	+	0.0534295	-0.00102687	9	-522.808	1063.63	12.3848	0.000194895
376	-10.1469	+	-0.370687	1.4624	-0.623009	NA	0.754517	-0.0175825	+	NA	-0.000684869	9	-522.837	1063.69	12.4428	0.000189321
500	-10.5147	+	-0.290222	1.46177	NA	NA	0.754523	-0.0257097	+	0.0490911	-0.000970897	9	-522.88	1063.78	12.5286	0.000181371
75	-5.34154	+	NA	1.39236	NA	+	NA	NA	+	NA	NA	5	-527.025	1064.05	12.8075	0.000157767
248	-10.0582	+	-0.34736	1.45825	-0.565877	NA	0.709199	-0.0108004	+	0.00464327	NA	9	-523.111	1064.24	12.9906	0.000143964
440	-9.34679	+	-0.36051	1.46265	-0.361533	NA	0.648984	0.0170694	NA	0.0376949	-0.000987789	9	-523.164	1064.34	13.0965	0.00013654
76	-5.25546	+	-0.588346	1.38426	NA	+	NA	NA	+	NA	NA	6	-526.614	1065.23	13.9869	8.75e-05
504	-10.4833	+	-0.31789	1.46388	-0.578341	NA	0.769203	-0.00803759	+	0.046374	-0.000989165	10	-522.691	1065.4	14.1532	8.05e-05
331	-5.50565	+	NA	1.38596	NA	+	NA	NA	+	NA	0.000609754	6	-526.867	1065.74	14.4943	6.79e-05
107	-5.24289	+	NA	1.37745	NA	+	NA	-0.438612	+	NA	NA	6	-526.906	1065.82	14.571	6.53e-05
203	-5.45872	+	NA	1.39218	NA	+	NA	NA	+	0.0188508	NA	6	-527	1066.01	14.7595	5.94e-05
79	-5.31718	+	NA	1.39264	-0.123868	+	NA	NA	+	NA	NA	6	-527.018	1066.04	14.7957	5.84e-05
332	-5.40617	+	-0.574404	1.37825	NA	+	NA	NA	+	NA	0.000550979	7	-526.477	1066.96	15.7164	3.68e-05
108	-5.1579	+	-0.587469	1.36967	NA	+	NA	-0.434214	+	NA	NA	7	-526.496	1067	15.7548	3.61e-05
80	-5.22154	+	-0.593313	1.38467	-0.169118	+	NA	NA	+	NA	NA	7	-526.6	1067.21	15.9622	3.26e-05
204	-5.30908	+	-0.579799	1.38426	NA	+	NA	NA	+	0.00842697	NA	7	-526.608	1067.23	15.9789	3.23e-05
363	-5.4083	+	NA	1.37113	NA	+	NA	-0.438652	+	NA	0.000614966	7	-526.748	1067.51	16.2581	2.81e-05
335	-5.48294	+	NA	1.38626	-0.113738	+	NA	NA	+	NA	0.00060853	7	-526.861	1067.73	16.4849	2.51e-05
459	-5.48332	+	NA	1.38571	NA	+	NA	NA	+	-0.00490564	0.000640507	7	-526.866	1067.74	16.494	2.5e-05
235	-5.35633	+	NA	1.3774	NA	+	NA	-0.434453	+	0.0181015	NA	7	-526.883	1067.78	16.5279	2.46e-05
111	-5.22197	+	NA	1.37778	-0.1096	+	NA	-0.43591	+	NA	NA	7	-526.9	1067.81	16.5627	2.41e-05
207	-5.43427	+	NA	1.39244	-0.115723	+	NA	NA	+	0.0185748	NA	7	-526.994	1068	16.7497	2.2e-05
67	-5.09773	+	NA	1.53375	NA	NA	NA	NA	+	NA	NA	4	-530.074	1068.15	16.9037	2.03e-05
364	-5.30978	+	-0.573642	1.3637	NA	+	NA	-0.434769	+	NA	0.000556133	8	-526.36	1068.73	17.4841	1.52e-05
460	-5.331	+	-0.588356	1.37725	NA	+	NA	NA	+	-0.0160095	0.000649124	8	-526.463	1068.94	17.6904	1.37e-05
336	-5.37358	+	-0.579239	1.37867	-0.159262	+	NA	NA	+	NA	0.000548737	8	-526.465	1068.94	17.695	1.37e-05
112	-5.12788	+	-0.591896	1.37017	-0.154542	+	NA	-0.429994	+	NA	NA	8	-526.485	1068.98	17.7353	1.34e-05
236	-5.2071	+	-0.579769	1.36972	NA	+	NA	-0.432528	+	0.00767567	NA	8	-526.492	1069	17.749	1.33e-05
208	-5.27281	+	-0.585195	1.38465	-0.164933	+	NA	NA	+	0.00792481	NA	8	-526.595	1069.2	17.9558	1.2e-05
267	-6.84668	+	NA	1.43174	NA	+	NA	NA	NA	NA	0.00163183	5	-529.71	1069.43	18.1788	1.08e-05
367	-5.38902	+	NA	1.37146	-0.0994497	+	NA	-0.436189	+	NA	0.00061391	8	-526.744	1069.5	18.2519	1.04e-05
491	-5.3805	+	NA	1.3708	NA	+	NA	-0.43996	+	-0.00604741	0.000652618	8	-526.746	1069.5	18.2568	1.03e-05
68	-5.03376	+	-0.422576	1.53142	NA	NA	NA	NA	+	NA	NA	5	-529.861	1069.73	18.4799	9.25e-06
463	-5.459	+	NA	1.386	-0.115379	+	NA	NA	+	-0.00517693	0.00064068	8	-526.86	1069.73	18.4847	9.23e-06
239	-5.33538	+	NA	1.3777	-0.102138	+	NA	-0.432008	+	0.0178685	NA	8	-526.878	1069.77	18.5213	9.06e-06
323	-5.25678	+	NA	1.52787	NA	NA	NA	NA	+	NA	0.000590566	5	-529.922	1069.85	18.6028	8.7e-06
195	-5.21692	+	NA	1.53364	NA	NA	NA	NA	+	0.0191488	NA	5	-530.047	1070.1	18.8528	7.68e-06
71	-5.07185	+	NA	1.53411	-0.131804	NA	NA	NA	+	NA	NA	5	-530.066	1070.14	18.8896	7.54e-06
99	-5.10742	+	NA	1.53443	NA	NA	NA	0.0394252	+	NA	NA	5	-530.073	1070.15	18.9034	7.49e-06
11	-6.73897	+	NA	1.46707	NA	+	NA	NA	NA	NA	NA	4	-531.095	1070.19	18.9459	7.33e-06
492	-5.22856	+	-0.588476	1.36256	NA	+	NA	-0.438432	+	-0.0171703	0.000661669	9	-526.343	1070.7	19.4546	5.68e-06
368	-5.28109	+	-0.577927	1.36419	-0.14462	+	NA	-0.430812	+	NA	0.000554068	9	-526.35	1070.71	19.4675	5.65e-06
268	-6.76074	+	-0.482847	1.42708	NA	+	NA	NA	NA	NA	0.00157893	6	-529.437	1070.88	19.6336	5.2e-06
464	-5.29455	+	-0.593784	1.37768	-0.16614	+	NA	NA	+	-0.0165269	0.00065003	9	-526.45	1070.91	19.6676	5.11e-06
240	-5.17495	+	-0.584565	1.37018	-0.150878	+	NA	-0.428535	+	0.0072313	NA	9	-526.481	1070.98	19.7308	4.95e-06
271	-6.65527	+	NA	1.43068	-0.622939	+	NA	NA	NA	NA	0.00157466	6	-529.521	1071.05	19.8019	4.78e-06
299	-6.74746	+	NA	1.41571	NA	+	NA	-0.470599	NA	NA	0.00164201	6	-529.573	1071.15	19.9055	4.54e-06
395	-6.80462	+	NA	1.43111	NA	+	NA	NA	NA	-0.00927993	0.00169005	6	-529.706	1071.42	20.171	3.97e-06
324	-5.18451	+	-0.409328	1.52569	NA	NA	NA	NA	+	NA	0.000551096	6	-529.724	1071.45	20.2075	3.9e-06
495	-5.35964	+	NA	1.37113	-0.101282	+	NA	-0.437512	+	-0.00628638	0.000652915	9	-526.741	1071.5	20.2508	3.82e-06
15	-6.49579	+	NA	1.46366	-0.806278	+	NA	NA	NA	NA	NA	5	-530.777	1071.56	20.3127	3.7e-06
12	-6.65134	+	-0.50541	1.46285	NA	+	NA	NA	NA	NA	NA	5	-530.793	1071.59	20.3433	3.64e-06
139	-7.03304	+	NA	1.46423	NA	+	NA	NA	NA	0.0596498	NA	5	-530.82	1071.65	20.3983	3.55e-06
72	-5.00031	+	-0.427929	1.53189	-0.166401	NA	NA	NA	+	NA	NA	6	-529.848	1071.7	20.4557	3.45e-06
196	-5.11255	+	-0.411001	1.53134	NA	NA	NA	NA	+	0.0123695	NA	6	-529.85	1071.71	20.4594	3.44e-06
100	-5.04736	+	-0.423712	1.53235	NA	NA	NA	0.0561179	+	NA	NA	6	-529.859	1071.72	20.4778	3.41e-06
327	-5.23244	+	NA	1.52822	-0.122002	NA	NA	NA	+	NA	0.000589208	6	-529.916	1071.84	20.5912	3.22e-06
355	-5.26658	+	NA	1.52855	NA	NA	NA	0.0401772	+	NA	0.00059022	6	-529.921	1071.85	20.6028	3.2e-06
451	-5.23998	+	NA	1.52768	NA	NA	NA	NA	+	-0.00367707	0.000612926	6	-529.922	1071.85	20.6034	3.2e-06
43	-6.63694	+	NA	1.45046	NA	+	NA	-0.479649	NA	NA	NA	5	-530.952	1071.91	20.6614	3.11e-06
199	-5.19086	+	NA	1.53397	-0.123125	NA	NA	NA	+	0.0188415	NA	6	-530.04	1072.09	20.8408	2.84e-06
227	-5.22823	+	NA	1.5344	NA	NA	NA	0.0439708	+	0.0192284	NA	6	-530.046	1072.1	20.8523	2.83e-06
103	-5.08201	+	NA	1.53485	-0.133026	NA	NA	0.0423157	+	NA	NA	6	-530.065	1072.14	20.8893	2.77e-06
272	-6.55119	+	-0.510837	1.42582	-0.662904	+	NA	NA	NA	NA	0.00151433	7	-529.214	1072.44	21.1896	2.39e-06
300	-6.66065	+	-0.483604	1.41115	NA	+	NA	-0.470714	NA	NA	0.00158843	7	-529.299	1072.61	21.3598	2.19e-06
496	-5.19637	+	-0.593276	1.36306	-0.151423	+	NA	-0.43433	+	-0.0176086	0.000662193	10	-526.333	1072.68	21.4367	2.11e-06
303	-6.56432	+	NA	1.41519	-0.609978	+	NA	-0.452852	NA	NA	0.00158611	7	-529.394	1072.8	21.5496	1.99e-06
396	-6.67132	+	-0.500707	1.42563	NA	+	NA	NA	NA	-0.0188906	0.00169518	7	-529.416	1072.84	21.5945	1.95e-06
16	-6.39096	+	-0.53887	1.45911	-0.840731	+	NA	NA	NA	NA	NA	6	-530.432	1072.87	21.624	1.92e-06
399	-6.60576	+	NA	1.43005	-0.627541	+	NA	NA	NA	-0.0105812	0.00164063	7	-529.515	1073.04	21.7917	1.77e-06
143	-6.79137	+	NA	1.46078	-0.740523	+	NA	NA	NA	0.0557776	NA	6	-530.543	1073.09	21.8455	1.72e-06
427	-6.69918	+	NA	1.41496	NA	+	NA	-0.472968	NA	-0.0105203	0.00170787	7	-529.567	1073.14	21.8955	1.68e-06
140	-6.91564	+	-0.452591	1.46049	NA	+	NA	NA	NA	0.0514078	NA	6	-530.584	1073.18	21.9282	1.65e-06
47	-6.40314	+	NA	1.4478	-0.794039	+	NA	-0.456106	NA	NA	NA	6	-530.648	1073.3	22.0563	1.55e-06
44	-6.54853	+	-0.506034	1.44637	NA	+	NA	-0.479368	NA	NA	NA	6	-530.649	1073.31	22.0587	1.55e-06
171	-6.93175	+	NA	1.44811	NA	+	NA	-0.463155	NA	0.0590321	NA	6	-530.687	1073.38	22.1335	1.49e-06
259	-6.56978	+	NA	1.57133	NA	NA	NA	NA	NA	NA	0.00158928	4	-532.703	1073.41	22.1616	1.47e-06
328	-5.15242	+	-0.414513	1.52617	-0.156394	NA	NA	NA	+	NA	0.000548833	7	-529.712	1073.43	22.1866	1.45e-06
452	-5.13355	+	-0.417979	1.5251	NA	NA	NA	NA	+	-0.0108473	0.000617772	7	-529.717	1073.44	22.1966	1.44e-06
356	-5.19792	+	-0.410449	1.52662	NA	NA	NA	0.0559489	+	NA	0.00055047	7	-529.722	1073.45	22.2058	1.44e-06
200	-5.07724	+	-0.416671	1.53179	-0.159883	NA	NA	NA	+	0.0118694	NA	7	-529.838	1073.68	22.4375	1.28e-06
104	-5.01454	+	-0.429232	1.53291	-0.168275	NA	NA	0.0602554	+	NA	NA	7	-529.846	1073.7	22.4534	1.27e-06
228	-5.12727	+	-0.412091	1.53232	NA	NA	NA	0.0584726	+	0.0124551	NA	7	-529.848	1073.7	22.4573	1.27e-06
359	-5.24262	+	NA	1.52896	-0.12326	NA	NA	0.0428684	+	NA	0.00058879	7	-529.914	1073.84	22.5912	1.18e-06
455	-5.21397	+	NA	1.52802	-0.123306	NA	NA	NA	+	-0.00399201	0.000614118	7	-529.915	1073.84	22.5918	1.18e-06
483	-5.24997	+	NA	1.52836	NA	NA	NA	0.0394071	+	-0.00357086	0.000612183	7	-529.921	1073.85	22.6037	1.18e-06
231	-5.20257	+	NA	1.53477	-0.124415	NA	NA	0.0465599	+	0.0189235	NA	7	-530.039	1074.09	22.8404	1.05e-06
3	-6.46468	+	NA	1.60454	NA	NA	NA	NA	NA	NA	NA	3	-534.049	1074.1	22.8538	1.04e-06
304	-6.46036	+	-0.510338	1.41052	-0.649417	+	NA	-0.450235	NA	NA	0.00152524	8	-529.088	1074.19	22.94	9.95e-07
400	-6.44885	+	-0.530576	1.42439	-0.673526	+	NA	NA	NA	-0.0208621	0.00164125	8	-529.189	1074.39	23.1422	8.99e-07
144	-6.64882	+	-0.490425	1.45673	-0.782808	+	NA	NA	NA	0.0465803	NA	7	-530.264	1074.54	23.2909	8.35e-07
428	-6.56424	+	-0.502578	1.40955	NA	+	NA	-0.475181	NA	-0.0201485	0.00171206	8	-529.276	1074.56	23.3159	8.24e-07
48	-6.29866	+	-0.538119	1.44349	-0.827923	+	NA	-0.452637	NA	NA	NA	7	-530.304	1074.62	23.3711	8.02e-07
431	-6.50898	+	NA	1.41443	-0.614713	+	NA	-0.455327	NA	-0.0117243	0.001659	8	-529.386	1074.78	23.5371	7.38e-07
175	-6.69868	+	NA	1.44533	-0.73019	+	NA	-0.442732	NA	0.0552803	NA	7	-530.421	1074.85	23.6043	7.14e-07
172	-6.8126	+	-0.454429	1.44441	NA	+	NA	-0.465394	NA	0.0507362	NA	7	-530.449	1074.91	23.6605	6.94e-07
263	-6.37906	+	NA	1.5706	-0.620144	NA	NA	NA	NA	NA	0.00153206	5	-532.511	1075.03	23.7807	6.53e-07
260	-6.50654	+	-0.336226	1.57046	NA	NA	NA	NA	NA	NA	0.00155237	5	-532.57	1075.15	23.8981	6.16e-07
387	-6.53397	+	NA	1.5708	NA	NA	NA	NA	NA	-0.00788739	0.00163872	5	-532.699	1075.4	24.1561	5.42e-07
291	-6.57017	+	NA	1.57136	NA	NA	NA	0.00154522	NA	NA	0.00158929	5	-532.703	1075.41	24.1633	5.4e-07
456	-5.09797	+	-0.42372	1.52558	-0.161309	NA	NA	NA	+	-0.0113797	0.000618726	8	-529.705	1075.42	24.1748	5.37e-07
360	-5.16637	+	-0.415785	1.52717	-0.158273	NA	NA	0.05983	+	NA	0.000548136	8	-529.71	1075.43	24.1847	5.34e-07
484	-5.14704	+	-0.418992	1.526	NA	NA	NA	0.053996	+	-0.0107288	0.000616455	8	-529.715	1075.44	24.1955	5.31e-07
7	-6.22359	+	NA	1.60166	-0.798766	NA	NA	NA	NA	NA	NA	4	-533.732	1075.47	24.2193	5.25e-07
131	-6.75669	+	NA	1.60194	NA	NA	NA	NA	NA	0.0591471	NA	4	-533.773	1075.55	24.302	5.04e-07
232	-5.09248	+	-0.417922	1.53286	-0.161739	NA	NA	0.062302	+	0.0119516	NA	8	-529.835	1075.68	24.4351	4.71e-07
4	-6.39853	+	-0.360645	1.60401	NA	NA	NA	NA	NA	NA	NA	4	-533.896	1075.79	24.5477	4.45e-07
487	-5.22442	+	NA	1.52875	-0.124605	NA	NA	0.0420675	+	-0.00388731	0.000612973	8	-529.914	1075.84	24.5922	4.36e-07
35	-6.46181	+	NA	1.60432	NA	NA	NA	-0.0120386	NA	NA	NA	4	-534.049	1076.1	24.855	3.82e-07
432	-6.35154	+	-0.530869	1.40894	-0.660209	+	NA	-0.454671	NA	-0.0220069	0.00165892	9	-529.06	1076.14	24.8881	3.76e-07
176	-6.55578	+	-0.49071	1.44143	-0.771855	+	NA	-0.442075	NA	0.0460692	NA	8	-530.143	1076.3	25.0503	3.46e-07
264	-6.30109	+	-0.36443	1.56975	-0.648759	NA	NA	NA	NA	NA	0.00148892	6	-532.355	1076.72	25.4702	2.81e-07
135	-6.51698	+	NA	1.599	-0.732203	NA	NA	NA	NA	0.0552267	NA	5	-533.496	1077	25.7498	2.44e-07
391	-6.33563	+	NA	1.57004	-0.624344	NA	NA	NA	NA	-0.00926396	0.00158956	6	-532.507	1077.02	25.773	2.41e-07
295	-6.38317	+	NA	1.57092	-0.620607	NA	NA	0.0180772	NA	NA	0.00153174	6	-532.511	1077.03	25.7823	2.4e-07
8	-6.14289	+	-0.394359	1.6011	-0.824087	NA	NA	NA	NA	NA	NA	5	-533.547	1077.1	25.8514	2.32e-07
388	-6.44061	+	-0.348385	1.56951	NA	NA	NA	NA	NA	-0.0139463	0.00163844	6	-532.559	1077.12	25.8773	2.29e-07
292	-6.50915	+	-0.336393	1.57065	NA	NA	NA	0.0111287	NA	NA	0.00155219	6	-532.57	1077.15	25.9	2.26e-07
132	-6.67558	+	-0.30878	1.60143	NA	NA	NA	NA	NA	0.0539222	NA	5	-533.663	1077.33	26.0839	2.07e-07
419	-6.53392	+	NA	1.5708	NA	NA	NA	-0.000206074	NA	-0.00788765	0.00163872	6	-532.699	1077.41	26.1581	1.99e-07
488	-5.11199	+	-0.424871	1.52655	-0.163132	NA	NA	0.05791	+	-0.0112588	0.000617297	9	-529.703	1077.42	26.1735	1.98e-07
39	-6.22588	+	NA	1.60185	-0.799027	NA	NA	0.0100323	NA	NA	NA	5	-533.732	1077.47	26.2209	1.93e-07
163	-6.75799	+	NA	1.60204	NA	NA	NA	0.00528162	NA	0.0591551	NA	5	-533.773	1077.55	26.3037	1.85e-07
25	-10.1628	+	NA	NA	NA	+	0.737675	NA	NA	NA	NA	4	-534.837	1077.68	26.4299	1.74e-07
36	-6.39817	+	-0.36062	1.60398	NA	NA	NA	-0.00152782	NA	NA	NA	5	-533.896	1077.8	26.5494	1.64e-07
57	-9.98205	+	NA	NA	NA	+	0.746362	-1.04865	NA	NA	NA	5	-534.143	1078.29	27.044	1.28e-07
26	-9.95643	+	-0.680134	NA	NA	+	0.718566	NA	NA	NA	NA	5	-534.279	1078.56	27.3155	1.12e-07
392	-6.22286	+	-0.378266	1.56878	-0.657297	NA	NA	NA	NA	-0.015947	0.00158608	7	-532.34	1078.69	27.4431	1.05e-07
296	-6.30788	+	-0.364961	1.57027	-0.649635	NA	NA	0.0303333	NA	NA	0.00148831	7	-532.355	1078.72	27.4714	1.03e-07
136	-6.41534	+	-0.346217	1.59847	-0.76165	NA	NA	NA	NA	0.0491777	NA	6	-533.357	1078.72	27.4742	1.03e-07
89	-11.2604	+	NA	NA	NA	+	0.853774	NA	+	NA	NA	5	-534.445	1078.89	27.6477	9.45e-08
167	-6.5227	+	NA	1.59945	-0.732724	NA	NA	0.0241905	NA	0.0552594	NA	6	-533.496	1079	27.7511	8.98e-08
423	-6.33948	+	NA	1.57033	-0.624875	NA	NA	0.0161708	NA	-0.00921954	0.00158905	7	-532.506	1079.02	27.775	8.87e-08
40	-6.14825	+	-0.394792	1.60153	-0.824751	NA	NA	0.0237588	NA	NA	NA	6	-533.546	1079.1	27.8527	8.53e-08
420	-6.44266	+	-0.348514	1.56966	NA	NA	NA	0.00850268	NA	-0.0139339	0.00163799	7	-532.559	1079.13	27.8795	8.42e-08
58	-9.7722	+	-0.681165	NA	NA	+	0.726798	-1.04661	NA	NA	NA	6	-533.586	1079.18	27.9316	8.2e-08
281	-10.3343	+	NA	NA	NA	+	0.783918	NA	NA	NA	-0.000623685	5	-534.649	1079.3	28.0564	7.7e-08
164	-6.67859	+	-0.308934	1.60165	NA	NA	NA	0.0123912	NA	0.0539384	NA	6	-533.663	1079.33	28.0857	7.59e-08
121	-11.1358	+	NA	NA	NA	+	0.869081	-1.07432	+	NA	NA	6	-533.717	1079.44	28.1941	7.19e-08
29	-10.0791	+	NA	NA	-0.241551	+	0.73529	NA	NA	NA	NA	5	-534.807	1079.62	28.372	6.58e-08
153	-10.1833	+	NA	NA	NA	+	0.735445	NA	NA	0.00622056	NA	5	-534.834	1079.67	28.4253	6.41e-08
313	-10.1585	+	NA	NA	NA	+	0.794601	-1.05675	NA	NA	-0.000652462	6	-533.945	1079.9	28.6493	5.73e-08
90	-10.9522	+	-0.64332	NA	NA	+	0.82362	NA	+	NA	NA	6	-533.948	1079.9	28.6558	5.71e-08
282	-10.1273	+	-0.693109	NA	NA	+	0.765406	NA	NA	NA	-0.000636946	6	-534.068	1080.14	28.8957	5.06e-08
61	-9.91388	+	NA	NA	-0.202076	+	0.744392	-1.04213	NA	NA	NA	6	-534.123	1080.25	29.0056	4.79e-08
185	-9.99564	+	NA	NA	NA	+	0.744924	-1.04754	NA	0.00402591	NA	6	-534.142	1080.29	29.0435	4.7e-08
122	-10.8263	+	-0.644785	NA	NA	+	0.838728	-1.07354	+	NA	NA	7	-533.22	1080.45	29.2014	4.35e-08
30	-9.84785	+	-0.692029	NA	-0.30075	+	0.715188	NA	NA	NA	NA	6	-534.23	1080.47	29.2189	4.31e-08
154	-9.93451	+	-0.686886	NA	NA	+	0.720396	NA	NA	-0.00585174	NA	6	-534.276	1080.56	29.3117	4.11e-08
345	-11.3723	+	NA	NA	NA	+	0.890892	NA	+	NA	-0.000557077	6	-534.285	1080.58	29.3298	4.08e-08
93	-11.2494	+	NA	NA	-0.482271	+	0.865633	NA	+	NA	NA	6	-534.33	1080.67	29.4191	3.9e-08
424	-6.22928	+	-0.378777	1.56926	-0.658345	NA	NA	0.0276701	NA	-0.015886	0.00158533	8	-532.34	1080.69	29.4448	3.85e-08
168	-6.42328	+	-0.346753	1.59909	-0.76247	NA	NA	0.0342394	NA	0.0492134	NA	7	-533.356	1080.72	29.4751	3.79e-08
314	-9.94745	+	-0.694833	NA	NA	+	0.775592	-1.05556	NA	NA	-0.000665837	7	-533.363	1080.74	29.4882	3.77e-08
217	-11.3393	+	NA	NA	NA	+	0.851422	NA	+	0.0150321	NA	6	-534.426	1080.86	29.6116	3.54e-08
409	-10.559	+	NA	NA	NA	+	0.790352	NA	NA	0.0432955	-0.000915554	6	-534.537	1081.08	29.8346	3.17e-08
377	-11.2512	+	NA	NA	NA	+	0.90787	-1.08156	+	NA	-0.000582551	7	-533.547	1081.1	29.8569	3.13e-08
62	-9.68098	+	-0.690873	NA	-0.260288	+	0.723922	-1.03724	NA	NA	NA	7	-533.55	1081.11	29.8622	3.12e-08
186	-9.74094	+	-0.690441	NA	NA	+	0.72934	-1.04888	NA	-0.00816573	NA	7	-533.58	1081.17	29.923	3.03e-08
285	-10.2414	+	NA	NA	-0.285058	+	0.782716	NA	NA	NA	-0.000645873	6	-534.608	1081.22	29.976	2.95e-08
125	-11.1276	+	NA	NA	-0.449468	+	0.88002	-1.06171	+	NA	NA	7	-533.619	1081.25	30.0011	2.91e-08
249	-11.2055	+	NA	NA	NA	+	0.866985	-1.07097	+	0.0131953	NA	7	-533.703	1081.42	30.1679	2.68e-08
346	-11.0603	+	-0.656888	NA	NA	+	0.861259	NA	+	NA	-0.000576747	7	-533.766	1081.54	30.2934	2.52e-08
157	-10.0966	+	NA	NA	-0.236307	+	0.733637	NA	NA	0.00475801	NA	6	-534.805	1081.62	30.3704	2.42e-08
94	-10.9338	+	-0.65916	NA	-0.520702	+	0.835774	NA	+	NA	NA	7	-533.805	1081.62	30.373	2.42e-08
441	-10.3762	+	NA	NA	NA	+	0.800751	-1.04805	NA	0.0415788	-0.000932643	7	-533.844	1081.7	30.4509	2.33e-08
317	-10.0804	+	NA	NA	-0.245932	+	0.793566	-1.04887	NA	NA	-0.000671428	7	-533.915	1081.84	30.592	2.17e-08
218	-10.9676	+	-0.639899	NA	NA	+	0.823394	NA	+	0.00260355	NA	7	-533.947	1081.9	30.6569	2.1e-08
286	-10.0089	+	-0.707347	NA	-0.347239	+	0.763463	NA	NA	NA	-0.000664544	7	-534.003	1082.01	30.7673	1.99e-08
410	-10.2857	+	-0.664194	NA	NA	+	0.77073	NA	NA	0.0283401	-0.000827807	7	-534.018	1082.05	30.7984	1.96e-08
378	-10.9374	+	-0.658851	NA	NA	+	0.878018	-1.08145	+	NA	-0.000602175	8	-533.026	1082.06	30.8177	1.94e-08
126	-10.8117	+	-0.658975	NA	-0.48758	+	0.850001	-1.05878	+	NA	NA	8	-533.098	1082.21	30.9601	1.8e-08
473	-11.7212	+	NA	NA	NA	+	0.906557	NA	+	0.0522436	-0.000904616	7	-534.115	1082.24	30.9916	1.78e-08
189	-9.92443	+	NA	NA	-0.199108	+	0.743414	-1.04145	NA	0.00282612	NA	7	-534.122	1082.25	31.0067	1.76e-08
349	-11.3665	+	NA	NA	-0.520346	+	0.905735	NA	+	NA	-0.000588308	7	-534.152	1082.31	31.0661	1.71e-08
250	-10.8302	+	-0.64393	NA	NA	+	0.838662	-1.07335	+	0.000661038	NA	8	-533.22	1082.45	31.204	1.6e-08
158	-9.81411	+	-0.701581	NA	-0.310644	+	0.717605	NA	NA	-0.00806326	NA	7	-534.224	1082.46	31.2105	1.59e-08
318	-9.84584	+	-0.70673	NA	-0.307168	+	0.773905	-1.04457	NA	NA	-0.000689904	8	-533.313	1082.64	31.3914	1.45e-08
221	-11.3182	+	NA	NA	-0.468754	+	0.863268	NA	+	0.013017	NA	7	-534.315	1082.64	31.3931	1.45e-08
442	-10.0966	+	-0.668305	NA	NA	+	0.780571	-1.05013	NA	0.0264707	-0.000843877	8	-533.321	1082.65	31.4061	1.44e-08
505	-11.5917	+	NA	NA	NA	+	0.922952	-1.07208	+	0.0508736	-0.000920564	8	-533.39	1082.79	31.5441	1.35e-08
381	-11.2479	+	NA	NA	-0.488097	+	0.921664	-1.06809	+	NA	-0.000611619	8	-533.433	1082.88	31.6313	1.29e-08
413	-10.4697	+	NA	NA	-0.254987	+	0.789088	NA	NA	0.0421319	-0.000927767	7	-534.503	1083.02	31.7682	1.2e-08
190	-9.63846	+	-0.70259	NA	-0.272064	+	0.726926	-1.03958	NA	-0.0100485	NA	8	-533.542	1083.1	31.8486	1.16e-08
350	-11.0467	+	-0.674563	NA	-0.561112	+	0.876563	NA	+	NA	-0.000610952	8	-533.601	1083.21	31.9674	1.09e-08
253	-11.1878	+	NA	NA	-0.438147	+	0.877943	-1.0591	+	0.0113472	NA	8	-533.609	1083.23	31.9829	1.08e-08
474	-11.3297	+	-0.613444	NA	NA	+	0.874539	NA	+	0.037131	-0.000822929	8	-533.678	1083.37	32.1203	1.01e-08
222	-10.9336	+	-0.659207	NA	-0.520719	+	0.835764	NA	+	-2.34e-05	NA	8	-533.805	1083.62	32.3757	8.89e-09
445	-10.3016	+	NA	NA	-0.218688	+	0.799666	-1.04121	NA	0.0406191	-0.000943001	8	-533.82	1083.65	32.4046	8.76e-09
382	-10.9273	+	-0.674878	NA	-0.528445	+	0.892285	-1.06568	+	NA	-0.000633876	9	-532.884	1083.78	32.5361	8.2e-09
506	-11.1963	+	-0.617954	NA	NA	+	0.89063	-1.07508	+	0.0356309	-0.000838184	9	-532.947	1083.91	32.6623	7.7e-09
414	-10.164	+	-0.679947	NA	-0.325577	+	0.768533	NA	NA	0.0264874	-0.000841268	8	-533.959	1083.93	32.6836	7.62e-09
477	-11.7073	+	NA	NA	-0.486673	+	0.920029	NA	+	0.0509521	-0.000924816	8	-533.991	1083.99	32.7462	7.39e-09
254	-10.8012	+	-0.661263	NA	-0.489481	+	0.850203	-1.05916	+	-0.00175136	NA	9	-533.097	1084.21	32.9626	6.63e-09
446	-9.99223	+	-0.681403	NA	-0.2879	+	0.778658	-1.04012	NA	0.0249034	-0.000855895	9	-533.276	1084.57	33.3199	5.54e-09
509	-11.5808	+	NA	NA	-0.456757	+	0.935476	-1.05932	+	0.049689	-0.000939495	9	-533.283	1084.58	33.3347	5.5e-09
478	-11.3026	+	-0.633412	NA	-0.535175	+	0.888404	NA	+	0.0352088	-0.00084254	9	-533.522	1085.06	33.8127	4.33e-09
510	-11.1738	+	-0.635968	NA	-0.504578	+	0.903597	-1.06011	+	0.033874	-0.000856623	10	-532.813	1085.64	34.3966	3.24e-09
17	-9.69294	+	NA	NA	NA	NA	0.731925	NA	NA	NA	NA	3	-542.657	1091.32	40.0678	1.9e-10
81	-10.7848	+	NA	NA	NA	NA	0.847386	NA	+	NA	NA	4	-542.264	1092.53	41.2836	1.03e-10
18	-9.55578	+	-0.439869	NA	NA	NA	0.719478	NA	NA	NA	NA	4	-542.422	1092.85	41.6007	8.82e-11
273	-9.86365	+	NA	NA	NA	NA	0.777927	NA	NA	NA	-0.000619997	4	-542.468	1092.94	41.6929	8.43e-11
49	-9.64386	+	NA	NA	NA	NA	0.734098	-0.25242	NA	NA	NA	4	-542.614	1093.23	41.9842	7.28e-11
21	-9.61257	+	NA	NA	-0.23271	NA	0.729669	NA	NA	NA	NA	4	-542.629	1093.26	42.0133	7.18e-11
145	-9.71223	+	NA	NA	NA	NA	0.729837	NA	NA	0.0058368	NA	4	-542.654	1093.31	42.0636	7e-11
73	-5.1509	+	NA	NA	NA	+	NA	NA	+	NA	NA	4	-542.761	1093.52	42.2778	6.29e-11
82	-10.5953	+	-0.408452	NA	NA	NA	0.829161	NA	+	NA	NA	5	-542.063	1094.13	42.8834	4.65e-11
105	-4.92586	+	NA	NA	NA	+	NA	-1.04668	+	NA	NA	5	-542.07	1094.15	42.8986	4.61e-11
337	-10.8959	+	NA	NA	NA	NA	0.884263	NA	+	NA	-0.000553726	5	-542.103	1094.21	42.9646	4.46e-11
85	-10.7747	+	NA	NA	-0.472451	NA	0.859094	NA	+	NA	NA	5	-542.152	1094.31	43.0618	4.25e-11
74	-5.04022	+	-0.699329	NA	NA	+	NA	NA	+	NA	NA	5	-542.19	1094.39	43.1386	4.09e-11
113	-10.7471	+	NA	NA	NA	NA	0.851488	-0.277209	+	NA	NA	5	-542.212	1094.43	43.1828	4e-11
274	-9.72449	+	-0.451378	NA	NA	NA	0.76564	NA	NA	NA	-0.000626744	5	-542.221	1094.45	43.1997	3.97e-11
209	-10.8618	+	NA	NA	NA	NA	0.845119	NA	+	0.014629	NA	5	-542.245	1094.5	43.2488	3.87e-11
401	-10.0852	+	NA	NA	NA	NA	0.784301	NA	NA	0.0426444	-0.000907666	5	-542.358	1094.72	43.4748	3.46e-11
22	-9.45786	+	-0.450946	NA	-0.272151	NA	0.716479	NA	NA	NA	NA	5	-542.383	1094.77	43.523	3.37e-11
50	-9.51077	+	-0.435412	NA	NA	NA	0.721584	-0.236376	NA	NA	NA	5	-542.385	1094.77	43.5277	3.37e-11
146	-9.55198	+	-0.440885	NA	NA	NA	0.719802	NA	NA	-0.00102475	NA	5	-542.422	1094.85	43.6022	3.24e-11
305	-9.81461	+	NA	NA	NA	NA	0.780667	-0.26055	NA	NA	-0.00062748	5	-542.423	1094.85	43.604	3.24e-11
277	-9.77389	+	NA	NA	-0.276191	NA	0.776804	NA	NA	NA	-0.000641685	5	-542.429	1094.86	43.6164	3.22e-11
329	-5.40205	+	NA	NA	NA	+	NA	NA	+	NA	0.000947699	5	-542.464	1094.93	43.6866	3.11e-11
106	-4.81902	+	-0.691818	NA	NA	+	NA	-1.03396	+	NA	NA	6	-541.515	1095.04	43.7899	2.95e-11
53	-9.56786	+	NA	NA	-0.224235	NA	0.731886	-0.245948	NA	NA	NA	5	-542.588	1095.18	43.9344	2.75e-11
177	-9.66163	+	NA	NA	NA	NA	0.732208	-0.250912	NA	0.00526777	NA	5	-542.612	1095.23	43.9814	2.68e-11
149	-9.62881	+	NA	NA	-0.227783	NA	0.728143	NA	NA	0.00440131	NA	5	-542.627	1095.26	44.0119	2.64e-11
201	-5.27797	+	NA	NA	NA	+	NA	NA	+	0.0206099	NA	5	-542.737	1095.48	44.2319	2.37e-11
77	-5.13695	+	NA	NA	-0.0716593	+	NA	NA	+	NA	NA	5	-542.759	1095.52	44.2757	2.32e-11
361	-5.17943	+	NA	NA	NA	+	NA	-1.04067	+	NA	0.000952603	6	-541.782	1095.57	44.3238	2.26e-11
338	-10.7021	+	-0.420227	NA	NA	NA	0.86611	NA	+	NA	-0.000564041	6	-541.89	1095.79	44.54	2.03e-11
330	-5.27426	+	-0.684176	NA	NA	+	NA	NA	+	NA	0.000870668	6	-541.92	1095.85	44.5999	1.97e-11
86	-10.5773	+	-0.42542	NA	-0.500009	NA	0.840835	NA	+	NA	NA	6	-541.933	1095.87	44.6261	1.94e-11
465	-11.2409	+	NA	NA	NA	NA	0.89979	NA	+	0.0515768	-0.000896669	6	-541.935	1095.88	44.6306	1.94e-11
341	-10.8909	+	NA	NA	-0.510717	NA	0.898949	NA	+	NA	-0.000584483	6	-541.974	1095.96	44.708	1.87e-11
114	-10.5618	+	-0.403775	NA	NA	NA	0.83327	-0.263415	+	NA	NA	6	-542.016	1096.04	44.7927	1.79e-11
369	-10.8585	+	NA	NA	NA	NA	0.888915	-0.284461	+	NA	-0.00056082	6	-542.049	1096.11	44.8587	1.73e-11
233	-5.04406	+	NA	NA	NA	+	NA	-1.04365	+	0.0190681	NA	6	-542.051	1096.11	44.8612	1.73e-11
210	-10.6406	+	-0.399429	NA	NA	NA	0.828391	NA	+	0.00776539	NA	6	-542.058	1096.12	44.875	1.72e-11
109	-4.91799	+	NA	NA	-0.0413697	+	NA	-1.04596	+	NA	NA	6	-542.07	1096.15	44.8994	1.7e-11
117	-10.7388	+	NA	NA	-0.465238	NA	0.86286	-0.265885	+	NA	NA	6	-542.105	1096.22	44.9696	1.64e-11
213	-10.8415	+	NA	NA	-0.459171	NA	0.856823	NA	+	0.0126055	NA	6	-542.139	1096.28	45.0369	1.58e-11
402	-9.91373	+	-0.420534	NA	NA	NA	0.771847	NA	NA	0.0341951	-0.000857198	6	-542.149	1096.3	45.0574	1.57e-11
278	-9.61659	+	-0.464771	NA	-0.317807	NA	0.763945	NA	NA	NA	-0.000652029	6	-542.167	1096.34	45.094	1.54e-11
306	-9.67926	+	-0.446962	NA	NA	NA	0.768238	-0.24441	NA	NA	-0.000633581	6	-542.181	1096.37	45.1219	1.52e-11
78	-5.01642	+	-0.701923	NA	-0.120335	+	NA	NA	+	NA	NA	6	-542.185	1096.38	45.1291	1.51e-11
202	-5.08851	+	-0.692751	NA	NA	+	NA	NA	+	0.00766095	NA	6	-542.187	1096.38	45.1336	1.51e-11
241	-10.822	+	NA	NA	NA	NA	0.849255	-0.273485	+	0.0141163	NA	6	-542.196	1096.4	45.1511	1.5e-11
362	-5.0553	+	-0.677222	NA	NA	+	NA	-1.02895	+	NA	0.000876158	7	-541.251	1096.51	45.265	1.41e-11
433	-10.0358	+	NA	NA	NA	NA	0.786905	-0.251378	NA	0.042185	-0.000911771	6	-542.316	1096.64	45.3925	1.33e-11
405	-9.99904	+	NA	NA	-0.246217	NA	0.783104	NA	NA	0.041498	-0.000919232	6	-542.326	1096.66	45.4121	1.31e-11
54	-9.41775	+	-0.446207	NA	-0.26372	NA	0.718625	-0.227804	NA	NA	NA	6	-542.348	1096.7	45.4558	1.28e-11
150	-9.44555	+	-0.45411	NA	-0.275826	NA	0.7174	NA	NA	-0.00298694	NA	6	-542.382	1096.77	45.5235	1.24e-11
178	-9.5052	+	-0.436917	NA	NA	NA	0.722064	-0.236735	NA	-0.00149039	NA	6	-542.385	1096.78	45.5294	1.24e-11
309	-9.72928	+	NA	NA	-0.267667	NA	0.779518	-0.25289	NA	NA	-0.00064825	6	-542.387	1096.78	45.5332	1.24e-11
457	-5.32485	+	NA	NA	NA	+	NA	NA	+	-0.0170172	0.00105333	6	-542.452	1096.91	45.663	1.16e-11
333	-5.39125	+	NA	NA	-0.0547925	+	NA	NA	+	NA	0.000947235	6	-542.463	1096.93	45.6863	1.14e-11
110	-4.80181	+	-0.693637	NA	-0.0889779	+	NA	-1.03223	+	NA	NA	7	-541.512	1097.03	45.7862	1.09e-11
234	-4.85839	+	-0.686594	NA	NA	+	NA	-1.03308	+	0.00622342	NA	7	-541.513	1097.04	45.7879	1.09e-11
181	-9.58245	+	NA	NA	-0.219934	NA	0.730528	-0.244953	NA	0.00390108	NA	6	-542.587	1097.18	45.934	1.01e-11
205	-5.26448	+	NA	NA	-0.0667178	+	NA	NA	+	0.0205253	NA	6	-542.735	1097.48	46.2306	8.72e-12
342	-10.689	+	-0.439085	NA	-0.539839	NA	0.880875	NA	+	NA	-0.000596823	7	-541.74	1097.49	46.2425	8.66e-12
489	-5.09301	+	NA	NA	NA	+	NA	-1.0428	+	-0.018945	0.00107049	7	-541.767	1097.54	46.2954	8.44e-12
466	-11.0136	+	-0.375405	NA	NA	NA	0.881227	NA	+	0.0433371	-0.000851253	7	-541.77	1097.55	46.3031	8.4e-12
365	-5.17462	+	NA	NA	-0.0247971	+	NA	-1.04024	+	NA	0.000952422	7	-541.782	1097.57	46.3257	8.31e-12
469	-11.2276	+	NA	NA	-0.476738	NA	0.913082	NA	+	0.0502573	-0.000916411	7	-541.815	1097.64	46.3928	8.04e-12
370	-10.6688	+	-0.415538	NA	NA	NA	0.87073	-0.270475	+	NA	-0.000570537	7	-541.841	1097.69	46.4446	7.83e-12
458	-5.12984	+	-0.708274	NA	NA	+	NA	NA	+	-0.0309307	0.00106037	7	-541.876	1097.76	46.5135	7.57e-12
497	-11.2021	+	NA	NA	NA	NA	0.904155	-0.274528	+	0.0511921	-0.000900845	7	-541.885	1097.78	46.5325	7.49e-12
118	-10.5459	+	-0.420628	NA	-0.492915	NA	0.844593	-0.250276	+	NA	NA	7	-541.891	1097.79	46.5449	7.45e-12
334	-5.25329	+	-0.686545	NA	-0.104185	+	NA	NA	+	NA	0.000869506	7	-541.916	1097.84	46.5936	7.27e-12
373	-10.8554	+	NA	NA	-0.503431	NA	0.903224	-0.272414	+	NA	-0.000590926	7	-541.925	1097.86	46.6115	7.2e-12
214	-10.608	+	-0.419238	NA	-0.494017	NA	0.840179	NA	+	0.00523654	NA	7	-541.931	1097.87	46.6238	7.16e-12
242	-10.6049	+	-0.395322	NA	NA	NA	0.832524	-0.261847	+	0.00735255	NA	7	-542.012	1098.03	46.7857	6.6e-12
237	-5.03666	+	NA	NA	-0.0373889	+	NA	-1.04303	+	0.0190247	NA	7	-542.05	1098.11	46.8625	6.35e-12
245	-10.8035	+	NA	NA	-0.45265	NA	0.860627	-0.262955	+	0.0121469	NA	7	-542.092	1098.19	46.9471	6.09e-12
406	-9.80531	+	-0.434779	NA	-0.291145	NA	0.769947	NA	NA	0.0325416	-0.000869157	7	-542.102	1098.21	46.9669	6.03e-12
434	-9.86788	+	-0.416727	NA	NA	NA	0.774365	-0.238506	NA	0.0338478	-0.000861616	7	-542.111	1098.23	46.9838	5.98e-12
310	-9.57638	+	-0.459951	NA	-0.30937	NA	0.766524	-0.234446	NA	NA	-0.000657882	7	-542.13	1098.27	47.023	5.86e-12
206	-5.06381	+	-0.695499	NA	-0.117989	+	NA	NA	+	0.00744332	NA	7	-542.181	1098.37	47.1249	5.57e-12
490	-4.9018	+	-0.70221	NA	NA	+	NA	-1.03211	+	-0.0327337	0.00107651	8	-541.203	1098.42	47.171	5.45e-12
366	-5.04094	+	-0.678785	NA	-0.0730936	+	NA	-1.02751	+	NA	0.000875385	8	-541.249	1098.51	47.2635	5.2e-12
437	-9.95373	+	NA	NA	-0.238465	NA	0.785693	-0.244769	NA	0.0410901	-0.000923099	7	-542.286	1098.58	47.3346	5.02e-12
182	-9.40372	+	-0.449724	NA	-0.267805	NA	0.719666	-0.228474	NA	-0.00337109	NA	7	-542.347	1098.7	47.4562	4.72e-12
461	-5.31329	+	NA	NA	-0.0570224	+	NA	NA	+	-0.0170774	0.00105319	7	-542.45	1098.91	47.663	4.26e-12
238	-4.84061	+	-0.688506	NA	-0.0872562	+	NA	-1.03141	+	0.00607682	NA	8	-541.51	1099.03	47.7847	4.01e-12
470	-10.9872	+	-0.396047	NA	-0.508551	NA	0.894424	NA	+	0.0414518	-0.0008696	8	-541.631	1099.27	48.0269	3.55e-12
374	-10.6577	+	-0.434247	NA	-0.532797	NA	0.885081	-0.256503	+	NA	-0.000602566	8	-541.696	1099.4	48.1574	3.33e-12
498	-10.9788	+	-0.371435	NA	NA	NA	0.885629	-0.264146	+	0.0430573	-0.000855764	8	-541.724	1099.46	48.2126	3.24e-12
493	-5.08768	+	NA	NA	-0.0267043	+	NA	-1.04236	+	-0.0189722	0.00107017	8	-541.766	1099.54	48.2976	3.1e-12
501	-11.1907	+	NA	NA	-0.470357	NA	0.917123	-0.263295	+	0.0498933	-0.000920204	8	-541.769	1099.55	48.3031	3.09e-12
462	-5.10646	+	-0.710919	NA	-0.110851	+	NA	NA	+	-0.031107	0.00105999	8	-541.871	1099.75	48.5065	2.79e-12
246	-10.5747	+	-0.414917	NA	-0.487392	NA	0.843962	-0.249375	+	0.00489564	NA	8	-541.889	1099.79	48.5435	2.74e-12
438	-9.76431	+	-0.430511	NA	-0.28337	NA	0.772442	-0.229629	NA	0.0322588	-0.000873061	8	-542.067	1100.15	48.8992	2.3e-12
265	-7.15967	+	NA	NA	NA	+	NA	NA	NA	NA	0.00231608	4	-546.118	1100.24	48.9922	2.19e-12
494	-4.88564	+	-0.703991	NA	-0.0790032	+	NA	-1.03055	+	-0.0328605	0.00107658	9	-541.201	1100.42	49.1693	2.01e-12
297	-6.93792	+	NA	NA	NA	+	NA	-1.08717	NA	NA	0.0023307	5	-545.372	1100.75	49.5011	1.7e-12
502	-10.9549	+	-0.391859	NA	-0.502144	NA	0.898476	-0.251092	+	0.0412312	-0.000873947	9	-541.589	1101.19	49.9458	1.36e-12
266	-7.04631	+	-0.567794	NA	NA	+	NA	NA	NA	NA	0.00224531	5	-545.749	1101.5	50.2565	1.16e-12
269	-6.94087	+	NA	NA	-0.711739	+	NA	NA	NA	NA	0.00224957	5	-545.92	1101.85	50.5981	9.81e-13
298	-6.8243	+	-0.56474	NA	NA	+	NA	-1.08209	NA	NA	0.00225861	6	-545.008	1102.02	50.7767	8.98e-13
393	-7.04493	+	NA	NA	NA	+	NA	NA	NA	-0.0250817	0.00247143	5	-546.09	1102.19	50.9384	8.28e-13
9	-7.07204	+	NA	NA	NA	+	NA	NA	NA	NA	NA	3	-548.183	1102.37	51.1213	7.56e-13
301	-6.73192	+	NA	NA	-0.683497	+	NA	-1.07267	NA	NA	0.00226749	6	-545.194	1102.4	51.1481	7.46e-13
425	-6.8131	+	NA	NA	NA	+	NA	-1.09019	NA	-0.0271106	0.00249865	6	-545.34	1102.69	51.44	6.44e-13
41	-6.84144	+	NA	NA	NA	+	NA	-1.11663	NA	NA	NA	4	-547.395	1102.79	51.5465	6.11e-13
270	-6.80774	+	-0.593501	NA	-0.756214	+	NA	NA	NA	NA	0.00217074	6	-545.516	1103.04	51.791	5.41e-13
394	-6.86921	+	-0.598108	NA	NA	+	NA	NA	NA	-0.0370684	0.00247005	6	-545.687	1103.38	52.1331	4.56e-13
10	-6.95703	+	-0.579693	NA	NA	+	NA	NA	NA	NA	NA	4	-547.799	1103.6	52.3544	4.08e-13
302	-6.60015	+	-0.588228	NA	-0.726571	+	NA	-1.06496	NA	NA	0.00218798	7	-544.799	1103.61	52.3593	4.07e-13
13	-6.76874	+	NA	NA	-0.990586	+	NA	NA	NA	NA	NA	4	-547.818	1103.64	52.3921	4e-13
137	-7.42151	+	NA	NA	NA	+	NA	NA	NA	0.0733673	NA	4	-547.882	1103.77	52.5208	3.75e-13
397	-6.82268	+	NA	NA	-0.715994	+	NA	NA	NA	-0.025398	0.00240604	6	-545.892	1103.79	52.5439	3.71e-13
426	-6.6369	+	-0.595987	NA	NA	+	NA	-1.08586	NA	-0.0390213	0.00249503	7	-544.941	1103.89	52.6438	3.53e-13
42	-6.72633	+	-0.576286	NA	NA	+	NA	-1.11122	NA	NA	NA	5	-547.017	1104.04	52.7919	3.28e-13
45	-6.553	+	NA	NA	-0.961404	+	NA	-1.09568	NA	NA	NA	5	-547.06	1104.12	52.8774	3.14e-13
169	-7.18816	+	NA	NA	NA	+	NA	-1.10301	NA	0.072075	NA	5	-547.113	1104.23	52.984	2.98e-13
429	-6.60424	+	NA	NA	-0.687184	+	NA	-1.0755	NA	-0.0273302	0.00243573	7	-545.162	1104.33	53.0872	2.83e-13
14	-6.63499	+	-0.612234	NA	-1.02819	+	NA	NA	NA	NA	NA	5	-547.386	1104.78	53.5307	2.27e-13
398	-6.62258	+	-0.624234	NA	-0.765073	+	NA	NA	NA	-0.0380041	0.00239963	7	-545.45	1104.91	53.6629	2.12e-13
141	-7.12326	+	NA	NA	-0.927652	+	NA	NA	NA	0.0696959	NA	5	-547.551	1105.11	53.8601	1.92e-13
138	-7.27041	+	-0.528661	NA	NA	+	NA	NA	NA	0.0630703	NA	5	-547.57	1105.14	53.8969	1.89e-13
46	-6.42081	+	-0.606359	NA	-0.997689	+	NA	-1.08725	NA	NA	NA	6	-546.638	1105.28	54.0366	1.76e-13
430	-6.40568	+	-0.619779	NA	-0.734472	+	NA	-1.06842	NA	-0.0398015	0.00242754	8	-544.729	1105.47	54.2226	1.6e-13
170	-7.03606	+	-0.52738	NA	NA	+	NA	-1.10017	NA	0.061777	NA	6	-546.803	1105.61	54.3655	1.49e-13
173	-6.90426	+	NA	NA	-0.902337	+	NA	-1.08424	NA	0.0686371	NA	6	-546.808	1105.62	54.3768	1.48e-13
142	-6.94531	+	-0.564541	NA	-0.972021	+	NA	NA	NA	0.0584351	NA	6	-547.192	1106.39	55.1444	1.01e-13
174	-6.72732	+	-0.560503	NA	-0.944907	+	NA	-1.07855	NA	0.0574296	NA	7	-546.456	1106.92	55.6743	7.76e-14
65	-4.71963	+	NA	NA	NA	NA	NA	NA	+	NA	NA	3	-550.574	1107.15	55.9023	6.92e-14
321	-4.96869	+	NA	NA	NA	NA	NA	NA	+	NA	0.000939101	4	-550.278	1108.56	57.3117	3.42e-14
66	-4.64765	+	-0.454676	NA	NA	NA	NA	NA	+	NA	NA	4	-550.331	1108.66	57.4174	3.24e-14
97	-4.65906	+	NA	NA	NA	NA	NA	-0.25368	+	NA	NA	4	-550.531	1109.07	57.818	2.66e-14
193	-4.84417	+	NA	NA	NA	NA	NA	NA	+	0.0201893	NA	4	-550.551	1109.1	57.8573	2.6e-14
69	-4.70762	+	NA	NA	-0.0616314	NA	NA	NA	+	NA	NA	4	-550.572	1109.15	57.9008	2.55e-14
322	-4.88737	+	-0.441214	NA	NA	NA	NA	NA	+	NA	0.000893577	5	-550.05	1110.1	58.8571	1.58e-14
353	-4.90994	+	NA	NA	NA	NA	NA	-0.247267	+	NA	0.000940243	5	-550.237	1110.48	59.2321	1.31e-14
449	-4.89029	+	NA	NA	NA	NA	NA	NA	+	-0.0172696	0.00104635	5	-550.264	1110.53	59.2867	1.27e-14
325	-4.95982	+	NA	NA	-0.0448963	NA	NA	NA	+	NA	0.000938714	5	-550.277	1110.56	59.3119	1.26e-14
98	-4.59358	+	-0.448473	NA	NA	NA	NA	-0.231096	+	NA	NA	5	-550.295	1110.6	59.348	1.24e-14
194	-4.72829	+	-0.44506	NA	NA	NA	NA	NA	+	0.0128169	NA	5	-550.321	1110.65	59.3998	1.2e-14
70	-4.62858	+	-0.456987	NA	-0.0960935	NA	NA	NA	+	NA	NA	5	-550.327	1110.66	59.4119	1.2e-14
225	-4.7819	+	NA	NA	NA	NA	NA	-0.250304	+	0.0197761	NA	5	-550.509	1111.02	59.7756	9.98e-15
101	-4.64851	+	NA	NA	-0.0554363	NA	NA	-0.252856	+	NA	NA	5	-550.53	1111.06	59.8174	9.77e-15
197	-4.83268	+	NA	NA	-0.0566131	NA	NA	NA	+	0.0201104	NA	5	-550.549	1111.1	59.8565	9.58e-15
354	-4.83491	+	-0.435279	NA	NA	NA	NA	-0.22596	+	NA	0.000895294	6	-550.016	1112.04	60.7911	6e-15
450	-4.76998	+	-0.458431	NA	NA	NA	NA	NA	+	-0.025161	0.00104793	6	-550.02	1112.05	60.8007	5.98e-15
326	-4.87138	+	-0.443213	NA	-0.079408	NA	NA	NA	+	NA	0.000892694	6	-550.047	1112.1	60.8541	5.82e-15
481	-4.82874	+	NA	NA	NA	NA	NA	-0.249397	+	-0.0177856	0.00105109	6	-550.223	1112.45	61.206	4.88e-15
357	-4.9024	+	NA	NA	-0.0389087	NA	NA	-0.246715	+	NA	0.00093991	6	-550.237	1112.48	61.2329	4.81e-15
453	-4.88073	+	NA	NA	-0.0472339	NA	NA	NA	+	-0.0173246	0.00104623	6	-550.264	1112.53	61.287	4.69e-15
226	-4.67284	+	-0.439149	NA	NA	NA	NA	-0.229589	+	0.0125423	NA	6	-550.286	1112.58	61.3317	4.58e-15
102	-4.57608	+	-0.450669	NA	-0.0900409	NA	NA	-0.229646	+	NA	NA	6	-550.292	1112.59	61.3437	4.56e-15
198	-4.70894	+	-0.447411	NA	-0.0921048	NA	NA	NA	+	0.0126475	NA	6	-550.318	1112.64	61.3952	4.44e-15
229	-4.77178	+	NA	NA	-0.0507388	NA	NA	-0.24961	+	0.0197092	NA	6	-550.508	1113.02	61.7757	3.67e-15
257	-6.71059	+	NA	NA	NA	NA	NA	NA	NA	NA	0.0022946	3	-553.921	1113.84	62.596	2.44e-15
482	-4.71548	+	-0.452515	NA	NA	NA	NA	-0.22795	+	-0.0255134	0.00105192	7	-549.986	1113.98	62.7339	2.27e-15
358	-4.82038	+	-0.437162	NA	-0.0734227	NA	NA	-0.224761	+	NA	0.000894529	7	-550.013	1114.04	62.7892	2.21e-15
454	-4.75224	+	-0.460567	NA	-0.0846145	NA	NA	NA	+	-0.025311	0.00104796	7	-550.018	1114.04	62.7974	2.2e-15
485	-4.82052	+	NA	NA	-0.0411964	NA	NA	-0.248808	+	-0.0178262	0.00105048	7	-550.222	1114.45	63.2071	1.79e-15
230	-4.65513	+	-0.441387	NA	-0.0861607	NA	NA	-0.228194	+	0.0123924	NA	7	-550.283	1114.58	63.3282	1.69e-15
261	-6.49638	+	NA	NA	-0.697403	NA	NA	NA	NA	NA	0.00222972	4	-553.728	1115.46	64.2127	1.09e-15
258	-6.63927	+	-0.347642	NA	NA	NA	NA	NA	NA	NA	0.00225201	4	-553.782	1115.57	64.3201	1.03e-15
289	-6.64332	+	NA	NA	NA	NA	NA	-0.296016	NA	NA	0.00229856	4	-553.862	1115.73	64.4805	9.49e-16
385	-6.59533	+	NA	NA	NA	NA	NA	NA	NA	-0.0251715	0.00245065	4	-553.892	1115.79	64.5406	9.21e-16
1	-6.62321	+	NA	NA	NA	NA	NA	NA	NA	NA	NA	2	-555.981	1115.96	64.7164	8.44e-16
486	-4.69907	+	-0.454581	NA	-0.0786106	NA	NA	-0.226618	+	-0.0256854	0.001052	8	-549.983	1115.98	64.7317	8.37e-16
262	-6.41065	+	-0.372855	NA	-0.725658	NA	NA	NA	NA	NA	0.002181	5	-553.568	1117.14	65.8942	4.68e-16
5	-6.3252	+	NA	NA	-0.97445	NA	NA	NA	NA	NA	NA	3	-555.623	1117.25	66.0015	4.44e-16
293	-6.43418	+	NA	NA	-0.691176	NA	NA	-0.283354	NA	NA	0.0022343	5	-553.675	1117.35	66.1074	4.21e-16
129	-6.96952	+	NA	NA	NA	NA	NA	NA	NA	0.0725795	NA	3	-555.682	1117.37	66.1193	4.18e-16
389	-6.37728	+	NA	NA	-0.702002	NA	NA	NA	NA	-0.025563	0.00238717	5	-553.699	1117.4	66.1566	4.11e-16
290	-6.57588	+	-0.341702	NA	NA	NA	NA	-0.283002	NA	NA	0.00225633	5	-553.729	1117.46	66.2149	3.99e-16
386	-6.48884	+	-0.370378	NA	NA	NA	NA	NA	NA	-0.0316564	0.00244466	5	-553.736	1117.48	66.2306	3.96e-16
2	-6.54986	+	-0.359879	NA	NA	NA	NA	NA	NA	NA	NA	3	-555.833	1117.67	66.4203	3.6e-16
417	-6.52446	+	NA	NA	NA	NA	NA	-0.299006	NA	-0.0257919	0.00245828	5	-553.833	1117.67	66.4232	3.59e-16
33	-6.54802	+	NA	NA	NA	NA	NA	-0.326975	NA	NA	NA	3	-555.91	1117.82	66.5747	3.33e-16
133	-6.67641	+	NA	NA	-0.911227	NA	NA	NA	NA	0.0689099	NA	4	-555.359	1118.72	67.4733	2.13e-16
6	-6.23727	+	-0.392225	NA	-0.998965	NA	NA	NA	NA	NA	NA	4	-555.446	1118.89	67.6477	1.95e-16
294	-6.35304	+	-0.366699	NA	-0.71915	NA	NA	-0.268045	NA	NA	0.00218597	6	-553.52	1119.05	67.8004	1.8e-16
390	-6.25283	+	-0.395976	NA	-0.73351	NA	NA	NA	NA	-0.0325401	0.0023776	6	-553.52	1119.05	67.8007	1.8e-16
37	-6.2568	+	NA	NA	-0.967533	NA	NA	-0.308543	NA	NA	NA	4	-555.56	1119.12	67.876	1.74e-16
130	-6.88171	+	-0.311951	NA	NA	NA	NA	NA	NA	0.067122	NA	4	-555.573	1119.15	67.9018	1.72e-16
161	-6.89581	+	NA	NA	NA	NA	NA	-0.312635	NA	0.0721617	NA	4	-555.617	1119.24	67.9902	1.64e-16
421	-6.31182	+	NA	NA	-0.695606	NA	NA	-0.286102	NA	-0.0261182	0.00239494	6	-553.645	1119.3	68.0495	1.59e-16
418	-6.42264	+	-0.364459	NA	NA	NA	NA	-0.28557	NA	-0.0321252	0.00245178	6	-553.682	1119.37	68.1237	1.54e-16
34	-6.47885	+	-0.353261	NA	NA	NA	NA	-0.313423	NA	NA	NA	4	-555.767	1119.54	68.2904	1.41e-16
134	-6.56877	+	-0.346807	NA	-0.938151	NA	NA	NA	NA	0.0626864	NA	5	-555.223	1120.45	69.2029	8.95e-17
165	-6.60893	+	NA	NA	-0.905665	NA	NA	-0.296394	NA	0.0685726	NA	5	-555.3	1120.61	69.3578	8.28e-17
38	-6.17385	+	-0.385415	NA	-0.9918	NA	NA	-0.292136	NA	NA	NA	5	-555.389	1120.78	69.5355	7.58e-17
422	-6.19287	+	-0.38989	NA	-0.726598	NA	NA	-0.270328	NA	-0.0329461	0.00238517	7	-553.472	1120.95	69.7057	6.96e-17
162	-6.81183	+	-0.306214	NA	NA	NA	NA	-0.302357	NA	0.0668285	NA	5	-555.512	1121.03	69.7814	6.7e-17
166	-6.50602	+	-0.340738	NA	-0.932096	NA	NA	-0.283411	NA	0.06248	NA	6	-555.169	1122.34	71.0978	3.47e-17

## Sheet: Civet
	cond((Int))	disp((Int))	cond(All_Livestock_1)	cond(Dist_Road_K)	cond(Fencing_2)	cond(Height_meters)	cond(ndvi)	cond(Underpass_type)	cond(Water_source)	cond(Width_meters)	df	logLik	AICc	delta	weight		Family: binomial ( logit )
9	-13.6396	+	NA	NA	NA	0.930089	NA	NA	NA	NA	3	-136.328	278.659	0	NA		Formula:
73	-14.1251	+	NA	NA	NA	0.874939	NA	NA	0.147546	NA	4	-135.629	279.262	0.603375	NA		Civets ~ ndvi + Dist_Road_K + Fencing_2 + Water_source + Underpass_type +
11	-12.8832	+	NA	-3.63473	NA	0.980427	NA	NA	NA	NA	4	-135.723	279.449	0.790716	NA		All_Livestock_1 + Width_meters + Height_meters + (1 | Unique_ID)
10	-13.2898	+	-17.2014	NA	NA	0.902957	NA	NA	NA	NA	4	-135.847	279.697	1.03829	NA		Data: nomitdata
12	-12.5055	+	-17.6008	-3.71026	NA	0.953461	NA	NA	NA	NA	5	-135.161	280.328	1.66888	NA
201	-15.1331	+	NA	NA	NA	0.984867	NA	NA	0.258612	-0.00151188	5	-135.215	280.436	1.77681	NA		AIC BIC logLik deviance df.resid
74	-13.7731	+	-17.1202	NA	NA	0.858258	NA	NA	0.130556	NA	5	-135.284	280.573	1.91409	NA		288.0 361.9 -134.0 268.0 11900
137	-13.5155	+	NA	NA	NA	0.899846	NA	NA	NA	0.000322529	4	-136.296	280.596	1.93726	NA
25	-13.5428	+	NA	NA	NA	0.930745	-0.382567	NA	NA	NA	4	-136.305	280.614	1.95543	NA		Random effects:
13	-13.6677	+	NA	NA	+	0.930266	NA	NA	NA	NA	4	-136.316	280.635	1.97611	NA
41	-13.7033	+	NA	NA	NA	0.936673	NA	+	NA	NA	4	-136.328	280.659	2.00061	NA		Conditional model:
75	-13.4872	+	NA	-1.94257	NA	0.905137	NA	NA	0.10779	NA	5	-135.424	280.854	2.1951	NA		Groups Name Variance Std.Dev.
43	-14.2655	+	NA	-4.98808	NA	1.171	NA	+	NA	NA	5	-135.507	281.02	2.36077	NA		Unique_ID (Intercept) 6.53e-09 8.081e-05
105	-14.905	+	NA	NA	NA	0.94743	NA	+	0.157951	NA	5	-135.583	281.172	2.51323	NA		Number of obs: 11910, groups: Unique_ID, 72
89	-14.0506	+	NA	NA	NA	0.875886	-0.288263	NA	0.146623	NA	5	-135.616	281.238	2.57906	NA
77	-14.1534	+	NA	NA	+	0.87509	NA	NA	0.14759	NA	5	-135.617	281.238	2.57934	NA		Conditional model:
139	-12.9251	+	NA	-3.96527	NA	1.00908	NA	NA	NA	-0.000222489	5	-135.707	281.419	2.75982	NA			Estimate	Std. Error	z value	Pr(>|z|)
15	-12.911	+	NA	-3.63532	+	0.980583	NA	NA	NA	NA	5	-135.71	281.426	2.76697	NA		(Intercept)	-19.1	NaN	NaN	NaN
27	-12.8236	+	NA	-3.60379	NA	0.98052	-0.265228	NA	NA	NA	5	-135.712	281.429	2.77038	NA		ndvi	-0.384	NaN	NaN	NaN
138	-13.1873	+	-17.8973	NA	NA	0.877725	NA	NA	NA	0.000270498	5	-135.823	281.65	2.99163	NA		Dist_Road_K	-13.9	NaN	NaN	NaN
26	-13.1893	+	-17.349	NA	NA	0.903462	-0.391141	NA	NA	NA	5	-135.823	281.651	2.99178	NA		Fencing_2Y	0.0889	NaN	NaN	NaN
14	-13.3204	+	-17.7469	NA	+	0.902817	NA	NA	NA	NA	5	-135.826	281.657	2.99827	NA		Water_source	0.176	NaN	NaN	NaN
42	-13.0374	+	-17.2307	NA	NA	0.87704	NA	+	NA	NA	5	-135.841	281.687	3.02835	NA		Underpass_typeCulvert	2.83	NaN	NaN	NaN
202	-14.7415	+	-10.5313	NA	NA	0.960022	NA	NA	0.235019	-0.00138216	6	-134.932	281.871	3.21236	NA		All_Livestock_1	-240	NaN	NaN	NaN
203	-14.4388	+	NA	-2.14899	NA	1.0194	NA	NA	0.21735	-0.0015124	6	-134.962	281.931	3.27271	NA		Width_meters	-0.00245	NaN	NaN	NaN
76	-12.9903	+	-17.6353	-2.36454	NA	0.896544	NA	NA	0.080624	NA	6	-134.992	281.992	3.33326	NA		Height_meters	2.01	NaN	NaN	NaN
44	-13.6504	+	-17.4767	-4.79854	NA	1.10903	NA	+	NA	NA	6	-135.015	282.038	3.37903	NA
233	-16.3569	+	NA	NA	NA	1.09761	NA	+	0.284176	-0.00163144	6	-135.118	282.242	3.58361	NA
140	-12.5636	+	-11.5642	-4.20282	NA	0.994531	NA	NA	NA	-0.000306828	6	-135.128	282.262	3.6036	NA
16	-12.5364	+	-17.6707	-3.71039	+	0.95326	NA	NA	NA	NA	6	-135.139	282.286	3.62707	NA		Family: binomial ( logit )
28	-12.4464	+	-17.6314	-3.67907	NA	0.953462	-0.260498	NA	NA	NA	6	-135.151	282.308	3.64956	NA		Formula: Civets ~ Height_meters + (1 | Unique_ID)
205	-15.1616	+	NA	NA	+	0.985032	NA	NA	0.258677	-0.00151226	6	-135.202	282.412	3.75287	NA		Data: nomitdata
217	-15.0599	+	NA	NA	NA	0.985495	-0.270949	NA	0.257453	-0.00150934	6	-135.204	282.415	3.75583	NA
107	-14.8289	+	NA	-2.98229	NA	1.07994	NA	+	0.106717	NA	6	-135.235	282.477	3.8183	NA		AIC BIC logLik deviance df.resid
78	-13.8014	+	-16.9372	NA	+	0.858252	NA	NA	0.130275	NA	6	-135.266	282.538	3.87971	NA		278.7 300.8 -136.3 272.7 11907
90	-13.6926	+	-17.3643	NA	NA	0.859145	-0.305457	NA	0.129532	NA	6	-135.269	282.546	3.88681	NA
106	-14.188	+	-16.8013	NA	NA	0.896239	NA	+	0.136434	NA	6	-135.271	282.55	3.89111	NA		Random effects:
29	-13.5482	+	NA	NA	+	0.931349	-0.549459	NA	NA	NA	5	-136.274	282.554	3.89482	NA
153	-13.4258	+	NA	NA	NA	0.901302	-0.369031	NA	NA	0.000314269	5	-136.275	282.555	3.89627	NA		Conditional model:
141	-13.5436	+	NA	NA	+	0.900019	NA	NA	NA	0.000322624	5	-136.284	282.572	3.91369	NA		Groups Name Variance Std.Dev.
169	-13.6244	+	NA	NA	NA	0.910841	NA	+	NA	0.000327656	5	-136.295	282.595	3.93675	NA		Unique_ID (Intercept) 3.276 1.81
57	-13.6331	+	NA	NA	NA	0.940195	-0.38635	+	NA	NA	5	-136.305	282.614	3.9556	NA		Number of obs: 11910, groups: Unique_ID, 72
45	-13.7317	+	NA	NA	+	0.936894	NA	+	NA	NA	5	-136.315	282.636	3.97705	NA
235	-19.6551	+	NA	-13.7397	NA	2.0438	NA	+	0.206375	-0.00258617	7	-134.314	282.638	3.97889	NA		Conditional model:
79	-13.5154	+	NA	-1.94269	+	0.905265	NA	NA	0.107836	NA	6	-135.411	282.83	4.17124	NA			Estimate	Std. Error	z value	Pr(>|z|)
91	-13.4321	+	NA	-1.92411	NA	0.905656	-0.239474	NA	0.107444	NA	6	-135.415	282.838	4.1792	NA		(Intercept)	-13.6396	1.9692	-6.926	4.32e-12	***
59	-14.2079	+	NA	-4.96253	NA	1.17241	-0.297559	+	NA	NA	6	-135.493	282.994	4.33507	NA		Height_meters	0.9301	0.2448	3.8	0.000145	***
47	-14.2938	+	NA	-4.98914	+	1.17122	NA	+	NA	NA	6	-135.494	282.996	4.33709	NA		---
171	-18.3966	+	NA	-16.363	NA	2.0986	NA	+	NA	-0.00148807	6	-135.548	283.104	4.44522	NA		Signif. codes: 0 ‘***’ 0.001 ‘**’ 0.01 ‘*’ 0.05 ‘.’ 0.1 ‘ ’ 1
121	-14.8449	+	NA	NA	NA	0.950469	-0.315259	+	0.15722	NA	6	-135.568	283.143	4.48423	NA
109	-14.9338	+	NA	NA	+	0.947624	NA	+	0.157999	NA	6	-135.571	283.148	4.48944	NA
93	-14.0545	+	NA	NA	+	0.876637	-0.44408	NA	0.14621	NA	6	-135.59	283.186	4.52735	NA
204	-13.9139	+	-16.9569	-2.52794	NA	1.00115	NA	NA	0.183839	-0.00136705	7	-134.598	283.206	4.54731	NA
31	-12.8318	+	NA	-3.58744	+	0.980838	-0.417173	NA	NA	NA	6	-135.686	283.38	4.7213	NA
143	-12.9528	+	NA	-3.96587	+	1.00924	NA	NA	NA	-0.000222486	6	-135.694	283.395	4.73642	NA
155	-12.865	+	NA	-3.93601	NA	1.00935	-0.267712	NA	NA	-0.000224188	6	-135.696	283.398	4.73939	NA
30	-13.1864	+	-17.5418	NA	+	0.903531	-0.592561	NA	NA	NA	6	-135.778	283.562	4.90352	NA
154	-13.0936	+	-17.2055	NA	NA	0.879044	-0.379201	NA	NA	0.000262074	6	-135.8	283.607	4.9484	NA
142	-13.2182	+	-17.8094	NA	+	0.877678	NA	NA	NA	0.000269504	6	-135.802	283.611	4.95226	NA
58	-12.9711	+	-17.7451	NA	NA	0.880757	-0.380653	+	NA	NA	6	-135.818	283.644	4.98489	NA
170	-12.9815	+	-17.6795	NA	NA	0.85716	NA	+	NA	0.00026006	6	-135.819	283.644	4.98574	NA
46	-13.0611	+	-17.3509	NA	+	0.876172	NA	+	NA	NA	6	-135.82	283.647	4.98801	NA
108	-14.1077	+	-17.1127	-3.26529	NA	1.04262	NA	+	0.079655	NA	7	-134.861	283.732	5.07347	NA
234	-15.6036	+	-16.8053	NA	NA	1.03843	NA	+	0.254189	-0.00147277	7	-134.887	283.784	5.12563	NA
206	-14.768	+	-10.0891	NA	+	0.959849	NA	NA	0.234665	-0.0013802	7	-134.915	283.839	5.18052	NA
218	-14.6618	+	-8.84836	NA	NA	0.960591	-0.289022	NA	0.233688	-0.0013789	7	-134.919	283.847	5.18857	NA
207	-14.4669	+	NA	-2.14948	+	1.01953	NA	NA	0.217402	-0.00151262	7	-134.949	283.908	5.24879	NA
219	-14.3868	+	NA	-2.13123	NA	1.01963	-0.214798	NA	0.216788	-0.00151042	7	-134.955	283.919	5.26064	NA
172	-17.8159	+	-241.93	-16.0806	NA	2.03606	NA	+	NA	-0.00151569	7	-134.963	283.935	5.27667	NA
80	-13.0172	+	-17.2182	-2.37193	+	0.896671	NA	NA	0.0801553	NA	7	-134.973	283.955	5.29591	NA
92	-12.9336	+	-17.5676	-2.34351	NA	0.89692	-0.244279	NA	0.0803084	NA	7	-134.983	283.976	5.3169	NA
48	-13.6749	+	-17.7773	-4.79318	+	1.10807	NA	+	NA	NA	7	-134.995	283.999	5.34061	NA
60	-13.5948	+	-17.3603	-4.77347	NA	1.11051	-0.292542	+	NA	NA	7	-135.002	284.013	5.3545	NA
236	-19.102	+	-225.079	-13.9157	NA	2.01023	NA	+	0.178659	-0.00245954	8	-134.052	284.116	5.45711	NA
249	-16.295	+	NA	NA	NA	1.10039	-0.310004	+	0.283284	-0.00163077	7	-135.103	284.215	5.55591	NA
237	-16.3854	+	NA	NA	+	1.09777	NA	+	0.284233	-0.00163185	7	-135.105	284.219	5.55988	NA
144	-12.5949	+	-133.282	-4.20515	+	0.994495	NA	NA	NA	-0.000308066	7	-135.105	284.22	5.5615	NA
32	-12.448	+	-17.1544	-3.65744	+	0.953199	-0.448288	NA	NA	NA	7	-135.112	284.233	5.57421	NA
156	-12.5035	+	-13.4443	-4.17281	NA	0.994647	-0.263589	NA	NA	-0.000308421	7	-135.117	284.243	5.58408	NA
221	-15.0622	+	NA	NA	+	0.986124	-0.423936	NA	0.256902	-0.00150843	7	-135.178	284.365	5.70589	NA
111	-14.8577	+	NA	-2.98258	+	1.08012	NA	+	0.106766	NA	7	-135.222	284.453	5.79452	NA
123	-14.7764	+	NA	-2.96663	NA	1.08183	-0.275495	+	0.106383	NA	7	-135.223	284.456	5.79696	NA
94	-13.6877	+	-17.105	NA	+	0.859669	-0.48639	NA	0.128517	NA	7	-135.233	284.476	5.81714	NA
157	-13.4326	+	NA	NA	+	0.902241	-0.534472	NA	NA	0.000310839	6	-136.244	284.496	5.83731	NA
110	-14.2087	+	-17.0075	NA	+	0.895561	NA	+	0.136064	NA	7	-135.254	284.517	5.85796	NA
122	-14.1275	+	-17.3999	NA	NA	0.899398	-0.321194	+	0.135689	NA	7	-135.255	284.52	5.86118	NA
61	-13.6507	+	NA	NA	+	0.942094	-0.554386	+	NA	NA	6	-136.273	284.554	5.89489	NA
185	-13.5587	+	NA	NA	NA	0.914871	-0.374451	+	NA	0.00032047	6	-136.273	284.554	5.89495	NA
173	-13.6527	+	NA	NA	+	0.911027	NA	+	NA	0.000327931	6	-136.283	284.572	5.9135	NA
239	-19.683	+	NA	-13.7403	+	2.04391	NA	+	0.206399	-0.00258637	8	-134.3	284.613	5.95426	NA
251	-19.6043	+	NA	-13.746	NA	2.04596	-0.233955	+	0.20522	-0.00258308	8	-134.305	284.623	5.96422	NA
95	-13.4395	+	NA	-1.91296	+	0.906182	-0.388897	NA	0.107305	NA	7	-135.391	284.791	6.13224	NA
175	-14.4748	+	NA	-5.9092	+	1.24615	NA	+	NA	-0.000406534	7	-135.441	284.892	6.23291	NA
63	-14.2219	+	NA	-4.95119	+	1.17352	-0.454498	+	NA	NA	7	-135.466	284.942	6.28283	NA
187	-18.3065	+	NA	-16.3446	NA	2.10055	-0.412842	+	NA	-0.00149459	7	-135.521	285.051	6.39268	NA
125	-14.8602	+	NA	NA	+	0.952312	-0.475377	+	0.156942	NA	7	-135.54	285.089	6.43006	NA
208	-13.9394	+	-17.0962	-2.53383	+	1.00106	NA	NA	0.183324	-0.00136491	8	-134.58	285.172	6.51283	NA
220	-13.8593	+	-16.3717	-2.50784	NA	1.00125	-0.223035	NA	0.18328	-0.00136501	8	-134.591	285.193	6.5344	NA
159	-12.8732	+	NA	-3.9205	+	1.00974	-0.419774	NA	NA	-0.000225037	7	-135.67	285.349	6.69045	NA
158	-13.093	+	-17.7087	NA	+	0.879667	-0.57891	NA	NA	0.00025635	7	-135.756	285.521	6.86238	NA
62	-12.9732	+	-17.2815	NA	+	0.88135	-0.581909	+	NA	NA	7	-135.773	285.556	6.89737	NA
186	-12.9188	+	-17.4503	NA	NA	0.861343	-0.371086	+	NA	0.000253209	7	-135.797	285.604	6.94491	NA
174	-13.0055	+	-17.2117	NA	+	0.856409	NA	+	NA	0.000258664	7	-135.798	285.605	6.94616	NA
112	-14.1294	+	-17.2773	-3.26891	+	1.04214	NA	+	0.0792304	NA	8	-134.843	285.698	7.03877	NA
124	-14.0549	+	-16.9951	-3.24869	NA	1.0445	-0.277475	+	0.0793333	NA	8	-134.849	285.711	7.05205	NA
238	-15.6231	+	-16.2794	NA	+	1.03765	NA	+	0.253723	-0.00147032	8	-134.871	285.754	7.09563	NA
250	-15.5403	+	-16.6983	NA	NA	1.04127	-0.316707	+	0.25324	-0.00147165	8	-134.872	285.756	7.09693	NA
222	-14.6538	+	-8.90928	NA	+	0.96068	-0.462366	NA	0.232357	-0.00137398	8	-134.886	285.783	7.12453	NA
223	-14.3925	+	NA	-2.1197	+	1.01998	-0.360099	NA	0.216509	-0.00150963	8	-134.931	285.875	7.21589	NA
176	-17.8423	+	-684.857	-16.078	+	2.03543	NA	+	NA	-0.00151607	8	-134.943	285.898	7.23965	NA
96	-12.9306	+	-17.3749	-2.33891	+	0.897391	-0.42257	NA	0.0794175	NA	8	-134.948	285.908	7.24964	NA
64	-13.5955	+	-17.3129	-4.75019	+	1.11006	-0.479031	+	NA	NA	8	-134.963	285.939	7.28026	NA
240	-19.1262	+	-241.368	-13.9182	+	2.00995	NA	+	0.178371	-0.00245831	9	-134.035	286.086	7.42726	NA
252	-19.0526	+	-220.977	-13.9212	NA	2.01234	-0.229319	+	0.177563	-0.00245666	9	-134.044	286.102	7.44343	NA
253	-16.3089	+	NA	NA	+	1.10213	-0.469017	+	0.282932	-0.00163083	8	-135.074	286.161	7.50234	NA
160	-12.5055	+	-182.435	-4.15498	+	0.994712	-0.452432	NA	NA	-0.000311053	8	-135.077	286.167	7.50786	NA
127	-14.791	+	NA	-2.95859	+	1.08319	-0.430382	+	0.106277	NA	8	-135.197	286.405	7.74659	NA
126	-14.125	+	-17.4649	NA	+	0.90013	-0.502493	+	0.134719	NA	8	-135.219	286.45	7.79155	NA
189	-13.5772	+	NA	NA	+	0.917007	-0.541205	+	NA	0.00031762	7	-136.243	286.494	7.83573	NA
255	-19.6141	+	NA	-13.7526	+	2.04759	-0.377332	+	0.204531	-0.00258149	9	-134.28	286.576	7.91737	NA
33	-7.46714	+	NA	NA	NA	NA	NA	+	NA	NA	3	-140.3	286.603	7.944	NA
191	-18.318	+	NA	-16.3418	+	2.10179	-0.580508	+	NA	-0.00149755	8	-135.487	286.987	8.32782	NA
161	-8.07824	+	NA	NA	NA	NA	NA	+	NA	0.00215834	4	-139.539	287.08	8.42167	NA
224	-13.8535	+	-17.3132	-2.50095	+	1.00118	-0.391962	NA	0.182104	-0.00136007	9	-134.559	287.132	8.47363	NA
34	-6.94902	+	-18.0022	NA	NA	NA	NA	+	NA	NA	4	-139.657	287.317	8.65857	NA
97	-8.52575	+	NA	NA	NA	NA	NA	+	0.175795	NA	4	-139.712	287.426	8.76763	NA
190	-12.9223	+	-17.8069	NA	+	0.862391	-0.570735	+	NA	0.000247733	8	-135.753	287.518	8.8595	NA
128	-14.0529	+	-17.3028	-3.24386	+	1.04501	-0.455757	+	0.0785024	NA	9	-134.814	287.644	8.98489	NA
254	-15.5356	+	-16.6164	NA	+	1.04164	-0.490739	+	0.252018	-0.00146726	9	-134.838	287.691	9.03265	NA
192	-17.7402	+	-110.933	-16.056	+	2.03863	-0.570213	+	NA	-0.00152497	9	-134.897	287.809	9.15057	NA
162	-7.51144	+	-22.2154	NA	NA	NA	NA	+	NA	0.00183586	5	-138.98	287.965	9.30592	NA
256	-19.0543	+	-239.943	-13.9308	+	2.01355	-0.383952	+	0.176384	-0.00245289	10	-134.015	288.048	9.38933	NA
98	-7.88641	+	-17.8006	NA	NA	NA	NA	+	0.144128	NA	5	-139.207	288.418	9.7597	NA
1	-11.8034	+	NA	NA	NA	NA	NA	NA	NA	NA	2	-142.247	288.495	9.83618	NA
37	-7.49475	+	NA	NA	+	NA	NA	+	NA	NA	4	-140.288	288.58	9.92104	NA
49	-7.42429	+	NA	NA	NA	NA	-0.207002	+	NA	NA	4	-140.294	288.591	9.93198	NA
35	-7.51594	+	NA	0.266569	NA	NA	NA	+	NA	NA	4	-140.295	288.593	9.93428	NA
225	-8.50449	+	NA	NA	NA	NA	NA	+	0.0929113	0.00157967	5	-139.436	288.877	10.218	NA
130	-10.9578	+	-36.7738	NA	NA	NA	NA	NA	NA	0.00418609	4	-140.527	289.057	10.3985	NA
165	-8.10624	+	NA	NA	+	NA	NA	+	NA	0.00215957	5	-139.526	289.057	10.3987	NA
163	-8.13743	+	NA	0.343541	NA	NA	NA	+	NA	0.00215688	5	-139.529	289.063	10.4043	NA
177	-8.03853	+	NA	NA	NA	NA	-0.197999	+	NA	0.00216349	5	-139.532	289.07	10.4112	NA
38	-6.9769	+	-17.9392	NA	+	NA	NA	+	NA	NA	5	-139.633	289.27	10.6117	NA
50	-6.91416	+	-17.5416	NA	NA	NA	-0.164355	+	NA	NA	5	-139.653	289.311	10.6518	NA
36	-6.981	+	-18.1725	0.168829	NA	NA	NA	+	NA	NA	5	-139.654	289.314	10.655	NA
99	-8.604	+	NA	0.41557	NA	NA	NA	+	0.177826	NA	5	-139.694	289.392	10.7334	NA
101	-8.55393	+	NA	NA	+	NA	NA	+	0.175888	NA	5	-139.699	289.403	10.7445	NA
113	-8.49209	+	NA	NA	NA	NA	-0.161553	+	0.175729	NA	5	-139.707	289.42	10.7612	NA
193	-11.6481	+	NA	NA	NA	NA	NA	NA	0.0750867	0.00391843	4	-140.722	289.447	10.7878	NA
65	-12.684	+	NA	NA	NA	NA	NA	NA	0.223251	NA	3	-141.744	289.49	10.831	NA
145	-11.2226	+	NA	NA	NA	NA	-0.30937	NA	NA	0.00438027	4	-140.757	289.516	10.8577	NA
133	-11.3253	+	NA	NA	+	NA	NA	NA	NA	0.00438061	4	-140.758	289.52	10.8615	NA
226	-7.81486	+	-17.6659	NA	NA	NA	NA	+	0.0621871	0.00145786	6	-138.928	289.864	11.205	NA
166	-7.53746	+	-14.5124	NA	+	NA	NA	+	NA	0.00183088	6	-138.957	289.922	11.263	NA
164	-7.55669	+	-16.7266	0.245046	NA	NA	NA	+	NA	0.0018367	6	-138.974	289.955	11.2967	NA
178	-7.47808	+	-17.6587	NA	NA	NA	-0.162747	+	NA	0.00183963	6	-138.976	289.958	11.2997	NA
2	-11.4895	+	-16.6189	NA	NA	NA	NA	NA	NA	NA	3	-142.038	290.078	11.4196	NA
3	-11.4223	+	NA	-1.11066	NA	NA	NA	NA	NA	NA	3	-142.186	290.374	11.7156	NA
102	-7.91005	+	-17.3221	NA	+	NA	NA	+	0.143567	NA	6	-139.186	290.378	11.7193	NA
100	-7.95533	+	-17.2089	0.329815	NA	NA	NA	+	0.146061	NA	6	-139.194	290.396	11.737	NA
114	-7.85838	+	-17.9681	NA	NA	NA	-0.131444	+	0.144075	NA	6	-139.204	290.415	11.7563	NA
17	-11.7168	+	NA	NA	NA	NA	-0.348099	NA	NA	NA	3	-142.228	290.458	11.7994	NA
5	-11.832	+	NA	NA	+	NA	NA	NA	NA	NA	3	-142.234	290.47	11.8109	NA
53	-7.43446	+	NA	NA	+	NA	-0.352009	+	NA	NA	5	-140.271	290.548	11.8891	NA
39	-7.54339	+	NA	0.265936	+	NA	NA	+	NA	NA	5	-140.283	290.57	11.9117	NA
51	-7.47338	+	NA	0.274737	NA	NA	-0.211992	+	NA	NA	5	-140.288	290.581	11.922	NA
227	-8.57395	+	NA	0.383582	NA	NA	NA	+	0.0948895	0.00156232	6	-139.422	290.851	12.1925	NA
229	-8.5328	+	NA	NA	+	NA	NA	+	0.0929835	0.00158035	6	-139.423	290.854	12.1951	NA
241	-8.46722	+	NA	NA	NA	NA	-0.180858	+	0.0926087	0.00158651	6	-139.431	290.869	12.2098	NA
194	-11.2049	+	-16.849	NA	NA	NA	NA	NA	0.0497938	0.00388644	5	-140.504	291.013	12.3542	NA
134	-10.985	+	-30.0921	NA	+	NA	NA	NA	NA	0.00418517	5	-140.511	291.027	12.3684	NA
181	-8.04976	+	NA	NA	+	NA	-0.342863	+	NA	0.00216899	6	-139.51	291.028	12.3688	NA
146	-10.8826	+	-29.6736	NA	NA	NA	-0.31367	NA	NA	0.00418688	5	-140.512	291.028	12.3694	NA
167	-8.16525	+	NA	0.342853	+	NA	NA	+	NA	0.00215805	6	-139.517	291.04	12.3817	NA
179	-8.09745	+	NA	0.351065	NA	NA	-0.204274	+	NA	0.00216198	6	-139.522	291.052	12.3933	NA
66	-12.3261	+	-16.0307	NA	NA	NA	NA	NA	0.204928	NA	4	-141.595	291.194	12.5351	NA
54	-6.91162	+	-17.6114	NA	+	NA	-0.3499	+	NA	NA	6	-139.616	291.239	12.5803	NA
40	-7.00874	+	-17.7778	0.168025	+	NA	NA	+	NA	NA	6	-139.63	291.267	12.6085	NA
52	-6.94647	+	-17.7246	0.175304	NA	NA	-0.168168	+	NA	NA	6	-139.65	291.307	12.6482	NA
103	-8.63195	+	NA	0.414796	+	NA	NA	+	0.177918	NA	6	-139.681	291.369	12.7107	NA
117	-8.50202	+	NA	NA	+	NA	-0.301765	+	0.17581	NA	6	-139.687	291.381	12.7218	NA
67	-12.3464	+	NA	-0.810601	NA	NA	NA	NA	0.219584	NA	4	-141.69	291.384	12.725	NA
115	-8.56952	+	NA	0.42033	NA	NA	-0.168399	+	0.177768	NA	6	-139.689	291.385	12.7266	NA
195	-11.4398	+	NA	-0.587274	NA	NA	NA	NA	0.0746298	0.00385168	5	-140.696	291.398	12.739	NA
209	-11.574	+	NA	NA	NA	NA	-0.303654	NA	0.0747131	0.003922	5	-140.707	291.419	12.7608	NA
197	-11.6772	+	NA	NA	+	NA	NA	NA	0.0751566	0.00391934	5	-140.709	291.422	12.7634	NA
81	-12.6041	+	NA	NA	NA	NA	-0.317061	NA	0.222584	NA	4	-141.728	291.46	12.801	NA
149	-11.2291	+	NA	NA	+	NA	-0.472531	NA	NA	0.00438277	5	-140.728	291.461	12.8025	NA
69	-12.7131	+	NA	NA	+	NA	NA	NA	0.223296	NA	4	-141.731	291.465	12.806	NA
147	-11.0129	+	NA	-0.619843	NA	NA	-0.299383	NA	NA	0.00431032	5	-140.732	291.47	12.8111	NA
135	-11.1085	+	NA	-0.631699	+	NA	NA	NA	NA	0.00430902	5	-140.733	291.472	12.8129	NA
230	-7.83746	+	-17.7829	NA	+	NA	NA	+	0.0615508	0.00145696	7	-138.907	291.823	13.1645	NA
228	-7.87439	+	-15.9922	0.288953	NA	NA	NA	+	0.0640456	0.00144596	7	-138.92	291.849	13.1903	NA
242	-7.78271	+	-14.1768	NA	NA	NA	-0.152021	+	0.0619415	0.001463	7	-138.925	291.859	13.2001	NA
182	-7.47569	+	-17.7189	NA	+	NA	-0.342267	+	NA	0.00183709	7	-138.941	291.892	13.2335	NA
4	-11.0394	+	-16.5077	-1.23884	NA	NA	NA	NA	NA	NA	4	-141.953	291.91	13.251	NA
168	-7.58257	+	-11.0562	0.24412	+	NA	NA	+	NA	0.00183174	7	-138.952	291.913	13.2542	NA
180	-7.52318	+	-17.7251	0.251302	NA	NA	-0.168114	+	NA	0.00184048	7	-138.97	291.949	13.2902	NA
18	-11.4008	+	-16.5156	NA	NA	NA	-0.354779	NA	NA	NA	4	-142.019	292.04	13.3816	NA
6	-11.5166	+	-16.9348	NA	+	NA	NA	NA	NA	NA	4	-142.023	292.049	13.3902	NA
19	-11.3444	+	NA	-1.09827	NA	NA	-0.33427	NA	NA	NA	4	-142.169	292.341	13.6822	NA
7	-11.4507	+	NA	-1.11137	+	NA	NA	NA	NA	NA	4	-142.173	292.349	13.6906	NA
118	-7.85256	+	-17.9124	NA	+	NA	-0.302452	+	0.143281	NA	7	-139.173	292.356	13.6968	NA
104	-7.97866	+	-17.341	0.328259	+	NA	NA	+	0.145492	NA	7	-139.173	292.356	13.6972	NA
116	-7.92657	+	-17.4936	0.333772	NA	NA	-0.137823	+	0.146018	NA	7	-139.191	292.392	13.7334	NA
21	-11.7218	+	NA	NA	+	NA	-0.517108	NA	NA	NA	4	-142.197	292.398	13.7395	NA
55	-7.4843	+	NA	0.279581	+	NA	-0.357767	+	NA	NA	6	-140.265	292.538	13.879	NA
245	-8.47788	+	NA	NA	+	NA	-0.323974	+	0.0924783	0.00159292	7	-139.409	292.828	14.1691	NA
231	-8.60195	+	NA	0.383051	+	NA	NA	+	0.0949188	0.00156317	7	-139.41	292.829	14.1701	NA
243	-8.536	+	NA	0.389494	NA	NA	-0.187244	+	0.0945516	0.00156943	7	-139.417	292.843	14.1839	NA
196	-10.9318	+	-17.0648	-0.728476	NA	NA	NA	NA	0.0485856	0.00380089	6	-140.463	292.932	14.2737	NA
136	-10.7072	+	-14.6894	-0.769846	+	NA	NA	NA	NA	0.00408979	6	-140.469	292.945	14.2862	NA
148	-10.6136	+	-27.3293	-0.756905	NA	NA	-0.299472	NA	NA	0.00409366	6	-140.471	292.949	14.2904	NA
150	-10.8825	+	-17.3112	NA	+	NA	-0.490033	NA	NA	0.00418587	6	-140.478	292.964	14.305	NA
198	-11.2301	+	-16.6371	NA	+	NA	NA	NA	0.0494071	0.00388795	6	-140.488	292.984	14.3251	NA
210	-11.1286	+	-16.8302	NA	NA	NA	-0.309458	NA	0.0493523	0.00389004	6	-140.489	292.985	14.3263	NA
183	-8.1093	+	NA	0.35561	+	NA	-0.349966	+	NA	0.00216735	7	-139.5	293.01	14.3508	NA
68	-11.9159	+	-16.4957	-0.931106	NA	NA	NA	NA	0.199929	NA	5	-141.521	293.046	14.3874	NA
82	-12.2437	+	-16.0515	NA	NA	NA	-0.323181	NA	0.204192	NA	5	-141.579	293.163	14.5042	NA
70	-12.3524	+	-16.1235	NA	+	NA	NA	NA	0.204739	NA	5	-141.581	293.167	14.5079	NA
56	-6.94499	+	-17.9338	0.181442	+	NA	-0.35439	+	NA	NA	7	-139.613	293.235	14.5766	NA
119	-8.57975	+	NA	0.423233	+	NA	-0.309411	+	0.177848	NA	7	-139.668	293.346	14.6872	NA
83	-12.2746	+	NA	-0.801931	NA	NA	-0.303212	NA	0.219005	NA	5	-141.676	293.357	14.6981	NA
71	-12.3752	+	NA	-0.811404	+	NA	NA	NA	0.219634	NA	5	-141.677	293.359	14.7002	NA
213	-11.58	+	NA	NA	+	NA	-0.466361	NA	0.0745884	0.00392532	6	-140.679	293.365	14.7063	NA
211	-11.3722	+	NA	-0.577232	NA	NA	-0.293702	NA	0.0742633	0.00385662	6	-140.683	293.373	14.7142	NA
199	-11.4685	+	NA	-0.587946	+	NA	NA	NA	0.0746852	0.00385253	6	-140.683	293.374	14.7148	NA
85	-12.6089	+	NA	NA	+	NA	-0.482286	NA	0.222327	NA	5	-141.699	293.403	14.7445	NA
151	-11.0213	+	NA	-0.614669	+	NA	-0.461268	NA	NA	0.00431357	6	-140.704	293.416	14.7572	NA
246	-7.77561	+	-16.3487	NA	+	NA	-0.326843	+	0.0608216	0.00146767	8	-138.892	293.797	15.1381	NA
232	-7.89679	+	-18.0715	0.287267	+	NA	NA	+	0.0634011	0.00144522	8	-138.898	293.809	15.1502	NA
244	-7.84176	+	-17.3354	0.293711	NA	NA	-0.157748	+	0.0638018	0.00145108	8	-138.916	293.844	15.1852	NA
20	-10.9613	+	-16.4247	-1.22568	NA	NA	-0.336867	NA	NA	NA	5	-141.935	293.876	15.2172	NA
8	-11.0662	+	-16.7875	-1.23974	+	NA	NA	NA	NA	NA	5	-141.937	293.88	15.2213	NA
184	-7.52171	+	-17.6513	0.256855	+	NA	-0.348473	+	NA	0.00183793	8	-138.935	293.883	15.2238	NA
22	-11.3995	+	-16.8603	NA	+	NA	-0.534614	NA	NA	NA	5	-141.984	293.973	15.314	NA
23	-11.3516	+	NA	-1.09304	+	NA	-0.501383	NA	NA	NA	5	-142.139	294.283	15.6239	NA
120	-7.92117	+	-17.5332	0.336944	+	NA	-0.309668	+	0.145225	NA	8	-139.16	294.333	15.6738	NA
247	-8.54701	+	NA	0.393093	+	NA	-0.331109	+	0.0944489	0.00157549	8	-139.395	294.802	16.1431	NA
152	-10.6155	+	-16.7359	-0.75219	+	NA	-0.474468	NA	NA	0.00409343	7	-140.438	294.886	16.2272	NA
200	-10.9565	+	-16.6233	-0.73029	+	NA	NA	NA	0.0482109	0.00380198	7	-140.447	294.903	16.2445	NA
212	-10.8638	+	-16.9064	-0.718059	NA	NA	-0.295618	NA	0.0482073	0.00380591	7	-140.449	294.908	16.2488	NA
214	-11.1248	+	-16.728	NA	+	NA	-0.483899	NA	0.0485166	0.00389435	7	-140.457	294.922	16.2637	NA
72	-11.9415	+	-16.6384	-0.932827	+	NA	NA	NA	0.199734	NA	6	-141.506	295.019	16.3598	NA
84	-11.8433	+	-16.3436	-0.922287	NA	NA	-0.306001	NA	0.199321	NA	6	-141.506	295.019	16.3602	NA
86	-12.2418	+	-15.9215	NA	+	NA	-0.495134	NA	0.203522	NA	6	-141.547	295.102	16.4431	NA
87	-12.2814	+	NA	-0.798343	+	NA	-0.466558	NA	0.218781	NA	6	-141.647	295.302	16.6431	NA
215	-11.38	+	NA	-0.572979	+	NA	-0.455146	NA	0.074173	0.00386043	7	-140.655	295.32	16.661	NA
248	-7.83529	+	-18.2395	0.297557	+	NA	-0.333316	+	0.0626941	0.00145572	9	-138.883	295.782	17.123	NA
24	-10.9623	+	-16.4998	-1.22016	+	NA	-0.514926	NA	NA	NA	6	-141.901	295.81	17.1511	NA
216	-10.8618	+	-16.7622	-0.71468	+	NA	-0.468781	NA	0.0474156	0.00381063	8	-140.417	296.846	18.1874	NA
88	-11.8429	+	-16.7345	-0.919897	+	NA	-0.476411	NA	0.198683	NA	7	-141.475	296.959	18.3004	NA
129	22.8296	+	NA	NA	NA	NA	NA	NA	NA	-0.0464594	3	NA	NA	NA	NA
131	20.6498	+	NA	7.49815	NA	NA	NA	NA	NA	-0.0480878	4	NA	NA	NA	NA
132	20.2306	+	2.36185	7.34423	NA	NA	NA	NA	NA	-0.0478842	5	NA	NA	NA	NA
188	-17.7365	+	-1030.6	-16.0647	NA	2.03826	-0.381543	+	NA	-0.00152139	8	NA	NA	NA	NA

## Sheet: Dikdik
	cond((Int))	disp((Int))	cond(All_Livestock_1)	cond(Dist_Road_K)	cond(Fencing_2)	cond(Height_meters)	cond(ndvi)	cond(Underpass_type)	cond(Water_source)	cond(Width_meters)	df	logLik	AICc	delta	weight		Family: binomial ( logit )
29	-13.493	+	NA	NA	1.7568	1.34244	-7.1726	NA	NA	NA	5	-745.711	1501.43	0	0.0881831		Formula:
61	-16.739	+	NA	NA	+	1.69554	-7.19501	+	NA	NA	6	-744.723	1501.45	0.0260218	0.0870432		Dikdik ~ ndvi + Dist_Road_K + Fencing_2 + Water_source + Underpass_type +
125	-17.8598	+	NA	NA	+	1.69087	-7.17691	+	0.178017	NA	7	-743.804	1501.62	0.190709	0.0801629		All_Livestock_1 + Width_meters + Height_meters + (1 | Unique_ID)
93	-14.0026	+	NA	NA	+	1.29375	-7.15728	NA	0.147949	NA	6	-745.139	1502.28	0.856835	0.0574548		Data: nomitdata
126	-19.0918	+	0.886247	NA	+	1.78821	-7.17602	+	0.214574	NA	8	-743.336	1502.68	1.25659	0.0470458
253	-18.8226	+	NA	NA	+	1.82999	-7.17592	+	0.254004	-0.00185591	8	-743.356	1502.72	1.29602	0.0461273		AIC BIC logLik deviance df.resid
63	-16.6629	+	NA	-1.60181	+	1.73422	-7.17704	+	NA	NA	7	-744.388	1502.79	1.35862	0.044706		1505.0 1578.9 -742.5 1485.0 11900
62	-17.45	+	0.636383	NA	+	1.76471	-7.19525	+	NA	NA	7	-744.463	1502.93	1.50725	0.0415041
30	-13.9717	+	0.612533	NA	+	1.38578	-7.17497	NA	NA	NA	6	-745.472	1502.95	1.52344	0.0411695		Random effects:
127	-17.7535	+	NA	-1.33867	+	1.71981	-7.15989	+	0.173799	NA	8	-743.49	1502.99	1.56488	0.0403252
31	-13.226	+	NA	-0.635708	+	1.33144	-7.16381	NA	NA	NA	6	-745.649	1503.31	1.87778	0.034485		Conditional model:
157	-13.556	+	NA	NA	+	1.35954	-7.17357	NA	NA	-0.000223875	6	-745.704	1503.42	1.988	0.0326361		Groups Name Variance Std.Dev.
189	-16.7593	+	NA	NA	+	1.70203	-7.19541	+	NA	-9.18e-05	7	-744.722	1503.45	2.02562	0.0320279		Unique_ID (Intercept) 8.178 2.86
94	-14.7321	+	0.796778	NA	+	1.34076	-7.15978	NA	0.178289	NA	7	-744.76	1503.53	2.10175	0.0308316		Number of obs: 11910, groups: Unique_ID, 72
254	-20.3294	+	0.964208	NA	+	1.96136	-7.174	+	0.305107	-0.00216431	9	-742.811	1503.64	2.20997	0.0292076
221	-14.7298	+	NA	NA	+	1.40802	-7.15493	NA	0.212739	-0.00171818	7	-744.82	1503.65	2.22146	0.0290404		Conditional model:
255	-18.7697	+	NA	-1.43433	+	1.86905	-7.15747	+	0.25316	-0.00194658	9	-742.975	1503.97	2.53832	0.0247855			Estimate	Std. Error	z value	Pr(>|z|)
95	-13.7722	+	NA	-0.536863	+	1.28447	-7.14971	NA	0.146546	NA	7	-745.085	1504.18	2.75233	0.0222702		(Intercept)	-20.0972	4.10455	-4.896	9.76e-07	***
128	-18.845	+	0.797145	-1.21707	+	1.80249	-7.1618	+	0.206598	NA	9	-743.103	1504.22	2.79419	0.021809		ndvi	-7.15859	1.059	-6.76	1.38e-11	***
64	-17.2763	+	0.552942	-1.54385	+	1.79276	-7.17934	+	NA	NA	8	-744.187	1504.39	2.95914	0.0200825		Dist_Road_K	-1.31777	1.85044	-0.712	0.4764
191	-16.7152	+	NA	-1.63309	+	1.75117	-7.17788	+	NA	-0.000219529	8	-744.38	1504.77	3.34472	0.0165611		Fencing_2Y	1.75333	0.15924	11.011	< 2e-16	***
222	-15.596	+	0.841761	NA	+	1.47485	-7.15704	NA	0.252129	-0.00195748	8	-744.402	1504.82	3.38835	0.0162037		Water_source	0.298552	0.168933	1.767	0.0772	.
32	-13.7255	+	0.580495	-0.521248	+	1.37437	-7.16832	NA	NA	NA	7	-745.435	1504.88	3.45132	0.0157015		Underpass_typeCulvert	3.38456	1.74388	1.941	0.0523	.
190	-17.461	+	0.635505	NA	+	1.76845	-7.19551	+	NA	-5.43e-05	8	-744.462	1504.94	3.50907	0.0152546		All_Livestock_1	0.86681	0.91344	0.949	0.3426
158	-14.0237	+	0.609582	NA	+	1.40036	-7.1756	NA	NA	-0.000193104	7	-745.467	1504.94	3.51653	0.0151978		Width_meters	-0.002214	0.002058	-1.076	0.282
256	-20.0972	+	0.86681	-1.31777	+	1.98114	-7.15859	+	0.298552	-0.0022141	10	-742.524	1505.07	3.63822	0.0143006		Height_meters	1.98114	0.464703	4.263	2.01e-05	***
159	-13.2952	+	NA	-0.660012	+	1.35248	-7.1646	NA	NA	-0.000278585	7	-745.638	1505.29	3.85835	0.0128102		---
96	-14.5359	+	0.768304	-0.388596	+	1.33194	-7.15478	NA	0.176254	NA	8	-744.735	1505.48	4.05398	0.0116165		Signif. codes: 0 ‘***’ 0.001 ‘**’ 0.01 ‘*’ 0.05 ‘.’ 0.1 ‘ ’ 1
223	-14.4877	+	NA	-0.611746	+	1.40061	-7.1463	NA	0.212549	-0.00176305	8	-744.748	1505.51	4.08045	0.0114637
192	-17.3163	+	0.549042	-1.57084	+	1.80669	-7.18003	+	NA	-0.000187199	9	-744.182	1506.38	4.95134	0.00741677
224	-15.3723	+	0.806954	-0.465616	+	1.46611	-7.151	NA	0.250397	-0.00198268	9	-744.364	1506.74	5.31644	0.00617926
160	-13.7809	+	0.57562	-0.542842	+	1.39214	-7.16885	NA	NA	-0.000240178	8	-745.427	1506.87	5.43955	0.00581034		Family: binomial ( logit )
53	-5.74116	+	NA	NA	+	NA	-7.19887	+	NA	NA	5	-753.079	1516.16	14.7346	5.57e-05		Formula: Dikdik ~ ndvi + Fencing_2 + Height_meters + (1 | Unique_ID)
181	-6.78669	+	NA	NA	+	NA	-7.19765	+	NA	0.00356231	6	-752.339	1516.69	15.2578	4.29e-05		Data: nomitdata
149	-10.0142	+	NA	NA	+	NA	-7.2301	NA	NA	0.00596842	5	-753.377	1516.76	15.3317	4.13e-05
150	-10.621	+	1.25242	NA	+	NA	-7.22746	NA	NA	0.00624969	6	-752.506	1517.02	15.5922	3.63e-05		AIC BIC logLik deviance df.resid
54	-6.217	+	0.983331	NA	+	NA	-7.20185	+	NA	NA	6	-752.519	1517.05	15.618	3.58e-05		1501.4 1538.3 -745.7 1491.4 11905
117	-6.85394	+	NA	NA	+	NA	-7.19364	+	0.168596	NA	6	-752.643	1517.29	15.8665	3.16e-05
182	-7.43111	+	1.01212	NA	+	NA	-7.20164	+	NA	0.00393606	7	-751.752	1517.51	16.0867	2.83e-05		Random effects:
118	-7.78546	+	1.17864	NA	+	NA	-7.19776	+	0.21619	NA	7	-751.905	1517.82	16.3926	2.43e-05
55	-5.69805	+	NA	-0.199646	+	NA	-7.19724	+	NA	NA	6	-753.073	1518.15	16.7263	2.06e-05		Conditional model:
21	-10.2678	+	NA	NA	+	NA	-7.24648	NA	NA	NA	4	-755.121	1518.25	16.8176	1.97e-05		Groups Name Variance Std.Dev.
22	-10.9106	+	1.34561	NA	+	NA	-7.24156	NA	NA	NA	5	-754.134	1518.27	16.8456	1.94e-05		Unique_ID (Intercept) 10.45 3.232
245	-7.28674	+	NA	NA	+	NA	-7.19595	+	0.100729	0.00295821	7	-752.197	1518.4	16.9757	1.82e-05		Number of obs: 11910, groups: Unique_ID, 72
214	-11.3367	+	1.40009	NA	+	NA	-7.22585	NA	0.139832	0.00546311	7	-752.281	1518.57	17.1445	1.67e-05
213	-10.3699	+	NA	NA	+	NA	-7.22908	NA	0.0792971	0.00549812	6	-753.292	1518.59	17.1627	1.65e-05		Conditional model:
151	-9.78153	+	NA	-0.631371	+	NA	-7.2249	NA	NA	0.00587593	6	-753.329	1518.67	17.2382	1.59e-05			Estimate	Std. Error	z value	Pr(>|z|)
183	-6.74681	+	NA	-0.179593	+	NA	-7.19618	+	NA	0.00355793	7	-752.335	1518.68	17.2516	1.58e-05		(Intercept)	-13.493	1.8764	-7.191	6.43e-13	***
86	-12.0491	+	1.58056	NA	+	NA	-7.23378	NA	0.250672	NA	6	-753.438	1518.88	17.4553	1.43e-05		ndvi	-7.1726	1.0594	-6.771	1.28e-11	***
246	-8.26711	+	1.14987	NA	+	NA	-7.20039	+	0.147376	0.00311177	8	-751.49	1518.99	17.5649	1.35e-05		Fencing_2Y	1.7568	0.1591	11.04	< 2e-16	***
152	-10.4852	+	1.23064	-0.350575	+	NA	-7.22528	NA	NA	0.00619666	7	-752.494	1519	17.57	1.35e-05		Height_meters	1.3424	0.2857	4.699	2.61e-06	***
56	-6.21245	+	0.982508	-0.0180278	+	NA	-7.20163	+	NA	NA	7	-752.519	1519.05	17.6202	1.32e-05		---
119	-6.8074	+	NA	-0.362986	+	NA	-7.19042	+	0.173122	NA	7	-752.624	1519.26	17.8307	1.18e-05		Signif. codes: 0 ‘***’ 0.001 ‘**’ 0.01 ‘*’ 0.05 ‘.’ 0.1 ‘ ’ 1
85	-10.9952	+	NA	NA	+	NA	-7.23931	NA	0.187185	NA	5	-754.676	1519.36	17.9289	1.13e-05
184	-7.43373	+	1.01264	0.0103503	+	NA	-7.20171	+	NA	0.00393648	8	-751.752	1519.52	18.0894	1.04e-05
120	-7.75376	+	1.16857	-0.194381	+	NA	-7.19619	+	0.218373	NA	8	-751.9	1519.81	18.3854	8.98e-06
23	-9.94695	+	NA	-0.881926	+	NA	-7.23994	NA	NA	NA	5	-755.038	1520.08	18.6526	7.85e-06
24	-10.6884	+	1.3105	-0.589312	+	NA	-7.23838	NA	NA	NA	6	-754.104	1520.21	18.787	7.34e-06
247	-7.2407	+	NA	-0.273544	+	NA	-7.19359	+	0.103394	0.00293645	8	-752.186	1520.38	18.9572	6.74e-06
215	-10.1413	+	NA	-0.724284	+	NA	-7.22255	NA	0.089447	0.00532547	7	-753.224	1520.46	19.0305	6.5e-06
216	-11.1693	+	1.37003	-0.464381	+	NA	-7.22246	NA	0.144695	0.00535671	8	-752.257	1520.53	19.098	6.29e-06
88	-11.7541	+	1.51885	-0.809866	+	NA	-7.22738	NA	0.265783	NA	7	-753.364	1520.74	19.3096	5.65e-06
248	-8.24556	+	1.14462	-0.105314	+	NA	-7.19959	+	0.148328	0.00310186	9	-751.489	1520.99	19.5651	4.98e-06
87	-10.6425	+	NA	-1.12334	+	NA	-7.22817	NA	0.2125	NA	6	-754.515	1521.04	19.61	4.87e-06
13	-14.4647	+	NA	NA	+	1.26939	NA	NA	NA	NA	4	-781.195	1570.39	68.966	9.32e-17
109	-18.3277	+	NA	NA	+	1.56043	NA	+	0.179451	NA	6	-779.318	1570.64	69.2158	8.23e-17
45	-17.2523	+	NA	NA	+	1.57084	NA	+	NA	NA	5	-780.384	1570.77	69.3458	7.71e-17
77	-14.9367	+	NA	NA	+	1.21447	NA	NA	0.151556	NA	5	-780.491	1570.99	69.5596	6.93e-17
110	-19.5309	+	0.894741	NA	+	1.65685	NA	+	0.214089	NA	7	-778.831	1571.67	70.2434	4.92e-17
111	-18.1896	+	NA	-1.5161	+	1.59185	NA	+	0.174109	NA	7	-778.851	1571.71	70.2835	4.83e-17
237	-19.2402	+	NA	NA	+	1.68982	NA	+	0.252099	-0.00171815	7	-778.868	1571.75	70.3187	4.74e-17
47	-17.144	+	NA	-1.82256	+	1.61253	NA	+	NA	NA	6	-779.891	1571.79	70.3611	4.64e-17
14	-14.9113	+	0.592221	NA	+	1.31035	NA	NA	NA	NA	5	-780.967	1571.94	70.5121	4.3e-17
15	-14.0578	+	NA	-0.934417	+	1.25198	NA	NA	NA	NA	5	-781.042	1572.09	70.6607	4e-17
46	-17.9567	+	0.639504	NA	+	1.63989	NA	+	NA	NA	6	-780.117	1572.24	70.8137	3.7e-17
78	-15.6082	+	0.77466	NA	+	1.259	NA	NA	0.178553	NA	6	-780.124	1572.25	70.8273	3.68e-17
205	-15.6312	+	NA	NA	+	1.32044	NA	NA	0.214332	-0.00159054	6	-780.16	1572.33	70.8996	3.55e-17
141	-14.4917	+	NA	NA	+	1.27644	NA	NA	NA	-8.98e-05	5	-781.194	1572.39	70.965	3.43e-17
238	-20.7218	+	0.979389	NA	+	1.81994	NA	+	0.301693	-0.00202148	8	-778.295	1572.6	71.1745	3.09e-17
239	-19.158	+	NA	-1.59561	+	1.73116	NA	+	0.250357	-0.00181214	8	-778.323	1572.66	71.2309	3e-17
79	-14.5862	+	NA	-0.785289	+	1.20034	NA	NA	0.148644	NA	6	-780.358	1572.72	71.2959	2.91e-17
173	-17.2457	+	NA	NA	+	1.56883	NA	+	NA	2.78e-05	6	-780.384	1572.77	71.3475	2.83e-17
112	-19.2185	+	0.779204	-1.40541	+	1.67094	NA	+	0.204242	NA	8	-778.47	1572.95	71.5252	2.59e-17
48	-17.7204	+	0.529878	-1.77395	+	1.66813	NA	+	NA	NA	7	-779.702	1573.41	71.9852	2.06e-17
206	-16.4352	+	0.823189	NA	+	1.3835	NA	NA	0.250455	-0.00181646	7	-779.75	1573.51	72.0814	1.96e-17
16	-14.4971	+	0.531406	-0.835458	+	1.29022	NA	NA	NA	NA	6	-780.857	1573.72	72.2942	1.77e-17
240	-20.4256	+	0.856508	-1.48783	+	1.83904	NA	+	0.293245	-0.00206752	9	-777.869	1573.75	72.3267	1.74e-17
175	-17.1723	+	NA	-1.83906	+	1.62133	NA	+	NA	-0.000112105	7	-779.888	1573.79	72.3584	1.71e-17
142	-14.9304	+	0.591417	NA	+	1.31545	NA	NA	NA	-6.59e-05	6	-780.967	1573.94	72.5128	1.58e-17
207	-15.279	+	NA	-0.846738	+	1.30905	NA	NA	0.213013	-0.00164507	7	-780	1574.01	72.5815	1.53e-17
143	-14.1022	+	NA	-0.950646	+	1.26496	NA	NA	NA	-0.000167678	6	-781.037	1574.08	72.6532	1.48e-17
80	-15.2635	+	0.718776	-0.65014	+	1.24333	NA	NA	0.17432	NA	7	-780.042	1574.09	72.6654	1.47e-17
174	-17.9429	+	0.640228	NA	+	1.63559	NA	+	NA	6.02e-05	7	-780.116	1574.24	72.8149	1.36e-17
208	-16.07	+	0.761204	-0.713468	+	1.36815	NA	NA	0.246744	-0.00184552	8	-779.647	1575.31	73.8795	7.99e-18
176	-17.7406	+	0.528362	-1.787	+	1.67469	NA	+	NA	-8.52e-05	8	-779.7	1575.41	73.9852	7.58e-18
144	-14.5316	+	0.528836	-0.849112	+	1.30076	NA	NA	NA	-0.000138675	7	-780.854	1575.72	74.2907	6.51e-18
37	-6.92397	+	NA	NA	+	NA	NA	+	NA	NA	4	-788.764	1585.53	84.1049	4.81e-20
165	-7.84219	+	NA	NA	+	NA	NA	+	NA	0.00327226	5	-788.002	1586.01	84.5822	3.79e-20
38	-7.36832	+	0.963078	NA	+	NA	NA	+	NA	NA	5	-788.232	1586.47	85.0412	3.01e-20
101	-7.9915	+	NA	NA	+	NA	NA	+	0.168031	NA	5	-788.282	1586.57	85.1411	2.87e-20
133	-11.2731	+	NA	NA	+	NA	NA	NA	NA	0.00579679	4	-789.302	1586.61	85.1801	2.81e-20
134	-11.9126	+	1.27748	NA	+	NA	NA	NA	NA	0.00610383	5	-788.41	1586.82	85.397	2.52e-20
166	-8.42669	+	0.984735	NA	+	NA	NA	+	NA	0.00361002	6	-787.449	1586.91	85.4783	2.42e-20
102	-8.83201	+	1.1494	NA	+	NA	NA	+	0.210489	NA	6	-787.58	1587.17	85.7397	2.12e-20
39	-6.82801	+	NA	-0.430015	+	NA	NA	+	NA	NA	5	-788.738	1587.48	86.0529	1.82e-20
229	-8.32823	+	NA	NA	+	NA	NA	+	0.10112	0.0026572	6	-787.844	1587.7	86.2681	1.63e-20
167	-7.7467	+	NA	-0.410473	+	NA	NA	+	NA	0.00326019	6	-787.977	1587.96	86.5339	1.43e-20
6	-12.2607	+	1.38734	NA	+	NA	NA	NA	NA	NA	4	-790.153	1588.31	86.8828	1.2e-20
198	-12.6209	+	1.42801	NA	+	NA	NA	NA	0.139402	0.00531263	6	-788.173	1588.35	86.9258	1.17e-20
230	-9.21528	+	1.11855	NA	+	NA	NA	+	0.143213	0.00279627	7	-787.176	1588.36	86.9331	1.17e-20
5	-11.585	+	NA	NA	+	NA	NA	NA	NA	NA	3	-791.183	1588.37	86.9402	1.17e-20
135	-10.9299	+	NA	-0.874126	+	NA	NA	NA	NA	0.0056576	5	-789.201	1588.41	86.9798	1.14e-20
197	-11.6244	+	NA	NA	+	NA	NA	NA	0.0803562	0.0053104	5	-789.209	1588.42	86.9962	1.13e-20
40	-7.3041	+	0.948518	-0.254789	+	NA	NA	+	NA	NA	6	-788.223	1588.45	87.0265	1.12e-20
103	-7.90995	+	NA	-0.580868	+	NA	NA	+	0.174608	NA	6	-788.228	1588.46	87.0353	1.11e-20
136	-11.6702	+	1.23401	-0.580558	+	NA	NA	NA	NA	0.00600674	6	-788.372	1588.75	87.3243	9.62e-21
70	-13.3862	+	1.62345	NA	+	NA	NA	NA	0.254861	NA	5	-789.4	1588.81	87.3785	9.36e-21
168	-8.36456	+	0.971125	-0.22896	+	NA	NA	+	NA	0.00359825	7	-787.442	1588.89	87.4669	8.96e-21
104	-8.75753	+	1.12477	-0.416144	+	NA	NA	+	0.214814	NA	7	-787.555	1589.12	87.6917	8.01e-21
69	-12.2956	+	NA	NA	+	NA	NA	NA	0.194709	NA	4	-790.683	1589.37	87.9424	7.06e-21
231	-8.24083	+	NA	-0.497415	+	NA	NA	+	0.106254	0.00261343	7	-787.805	1589.62	88.1923	6.23e-21
7	-11.1535	+	NA	-1.1174	+	NA	NA	NA	NA	NA	4	-791.036	1590.08	88.6485	4.96e-21
199	-11.2991	+	NA	-0.971013	+	NA	NA	NA	0.0948288	0.00506094	6	-789.077	1590.16	88.7333	4.76e-21
8	-11.9363	+	1.32978	-0.802977	+	NA	NA	NA	NA	NA	5	-790.091	1590.19	88.7602	4.69e-21
200	-12.3546	+	1.3749	-0.69289	+	NA	NA	NA	0.147186	0.00514045	7	-788.113	1590.24	88.808	4.58e-21
232	-9.14176	+	1.09922	-0.33196	+	NA	NA	+	0.146163	0.00276254	8	-787.16	1590.33	88.9042	4.37e-21
72	-12.98	+	1.52995	-1.04665	+	NA	NA	NA	0.275446	NA	6	-789.267	1590.54	89.1127	3.93e-21
71	-11.8323	+	NA	-1.38621	+	NA	NA	NA	0.226878	NA	5	-790.419	1590.84	89.4151	3.38e-21
25	-12.6547	+	NA	NA	NA	1.28797	-4.50433	NA	NA	NA	4	-816.925	1641.85	140.427	2.83e-32
57	-15.6733	+	NA	NA	NA	1.61549	-4.51855	+	NA	NA	5	-816.018	1642.04	140.613	2.58e-32
121	-16.7599	+	NA	NA	NA	1.60924	-4.5024	+	0.174886	NA	6	-815.07	1642.15	140.719	2.45e-32
122	-18.1749	+	1.17053	NA	NA	1.72409	-4.52045	+	0.215206	NA	7	-814.195	1642.4	140.972	2.16e-32
89	-13.1448	+	NA	NA	NA	1.23852	-4.49094	NA	0.146095	NA	5	-816.322	1642.65	141.221	1.9e-32
26	-13.2882	+	0.929049	NA	NA	1.34721	-4.52399	NA	NA	NA	5	-816.337	1642.68	141.252	1.87e-32
58	-16.6095	+	0.956801	NA	NA	1.70828	-4.53636	+	NA	NA	6	-815.392	1642.79	141.363	1.77e-32
90	-14.0065	+	1.08509	NA	NA	1.29733	-4.51182	NA	0.180117	NA	6	-815.565	1643.14	141.709	1.49e-32
59	-15.5808	+	NA	-1.70076	NA	1.65508	-4.50478	+	NA	NA	6	-815.613	1643.23	141.806	1.42e-32
249	-17.688	+	NA	NA	NA	1.74251	-4.5015	+	0.248541	-0.00178002	7	-814.625	1643.26	141.833	1.4e-32
250	-19.3842	+	1.24284	NA	NA	1.89327	-4.5191	+	0.304852	-0.00213015	8	-813.657	1643.33	141.898	1.36e-32
123	-16.6376	+	NA	-1.4249	NA	1.63918	-4.48985	+	0.170114	NA	7	-814.689	1643.39	141.959	1.32e-32
27	-12.3227	+	NA	-0.776179	NA	1.27394	-4.49668	NA	NA	NA	5	-816.826	1643.66	142.23	1.15e-32
153	-12.7071	+	NA	NA	NA	1.30203	-4.50498	NA	NA	-0.000182334	5	-816.92	1643.85	142.418	1.05e-32
124	-17.9219	+	1.07755	-1.26161	NA	1.73876	-4.50932	+	0.207243	NA	8	-813.931	1643.87	142.448	1.03e-32
217	-13.8511	+	NA	NA	NA	1.34822	-4.48924	NA	0.209486	-0.00165171	6	-815.999	1644.01	142.578	9.66e-33
185	-15.686	+	NA	NA	NA	1.61947	-4.51878	+	NA	-5.6e-05	6	-816.017	1644.04	142.614	9.49e-33
60	-16.4238	+	0.867696	-1.59787	NA	1.73646	-4.52348	+	NA	NA	7	-815.086	1644.18	142.755	8.84e-33
251	-17.6203	+	NA	-1.51276	NA	1.78245	-4.48819	+	0.247331	-0.00187278	8	-814.173	1644.36	142.931	8.1e-33
218	-14.8604	+	1.12668	NA	NA	1.42923	-4.51008	NA	0.253939	-0.00193357	7	-815.192	1644.39	142.965	7.96e-33
91	-12.8576	+	NA	-0.656452	NA	1.22689	-4.48461	NA	0.144023	NA	6	-816.236	1644.48	143.052	7.62e-33
28	-13.0001	+	0.891109	-0.604833	NA	1.33365	-4.51809	NA	NA	NA	6	-816.285	1644.58	143.15	7.26e-33
154	-13.3305	+	0.927383	NA	NA	1.35878	-4.52443	NA	NA	-0.000151603	6	-816.334	1644.68	143.248	6.91e-33
252	-19.1505	+	1.14232	-1.35905	NA	1.91379	-4.50725	+	0.298494	-0.00218101	9	-813.334	1644.68	143.255	6.88e-33
186	-16.6129	+	0.956516	NA	NA	1.70945	-4.53644	+	NA	-1.71e-05	7	-815.391	1644.79	143.365	6.52e-33
92	-13.773	+	1.05106	-0.460684	NA	1.28675	-4.50744	NA	0.177694	NA	7	-815.527	1645.06	143.636	5.69e-33
187	-15.6264	+	NA	-1.72682	NA	1.66968	-4.50546	+	NA	-0.000188759	7	-815.607	1645.22	143.795	5.26e-33
155	-12.3854	+	NA	-0.798913	NA	1.29281	-4.49736	NA	NA	-0.000248039	6	-816.817	1645.64	144.214	4.26e-33
219	-13.5573	+	NA	-0.725191	NA	1.33888	-4.48224	NA	0.208884	-0.00170135	7	-815.891	1645.79	144.364	3.95e-33
188	-16.4578	+	0.865195	-1.61993	NA	1.74792	-4.52391	+	NA	-0.000151101	8	-815.083	1646.18	144.75	3.26e-33
220	-14.6016	+	1.08669	-0.535706	NA	1.4188	-4.50501	NA	0.251989	-0.00196104	8	-815.139	1646.29	144.863	3.08e-33
156	-13.0491	+	0.887796	-0.623798	NA	1.34901	-4.51855	NA	NA	-0.000205144	7	-816.28	1646.57	145.141	2.68e-33
49	-5.11571	+	NA	NA	NA	NA	-4.53825	+	NA	NA	4	-824.266	1656.54	155.108	1.84e-35
50	-5.61626	+	1.22575	NA	NA	NA	-4.55929	+	NA	NA	5	-823.349	1656.7	155.275	1.69e-35
146	-10.0052	+	1.47383	NA	NA	NA	-4.58086	NA	NA	0.00610104	5	-823.424	1656.85	155.426	1.57e-35
177	-6.08051	+	NA	NA	NA	NA	-4.53532	+	NA	0.00335416	5	-823.535	1657.08	155.648	1.4e-35
178	-6.74715	+	1.2489	NA	NA	NA	-4.55734	+	NA	0.00374263	6	-822.591	1657.19	155.762	1.32e-35
145	-9.35798	+	NA	NA	NA	NA	-4.56386	NA	NA	0.00578191	4	-824.676	1657.36	155.928	1.22e-35
114	-7.10435	+	1.38869	NA	NA	NA	-4.55521	+	0.211664	NA	6	-822.724	1657.46	156.028	1.16e-35
113	-6.18586	+	NA	NA	NA	NA	-4.53253	+	0.165166	NA	5	-823.822	1657.65	156.222	1.05e-35
18	-10.3018	+	1.55809	NA	NA	NA	-4.5945	NA	NA	NA	4	-825.085	1658.17	156.747	8.1e-36
210	-10.6801	+	1.59681	NA	NA	NA	-4.57956	NA	0.13529	0.00533122	6	-823.204	1658.41	156.987	7.18e-36
51	-5.04674	+	NA	-0.313352	NA	NA	-4.53673	+	NA	NA	5	-824.253	1658.51	157.083	6.84e-36
242	-7.53937	+	1.36475	NA	NA	NA	-4.55623	+	0.144628	0.00291789	7	-822.325	1658.66	157.232	6.35e-36
52	-5.59541	+	1.22132	-0.0860262	NA	NA	-4.55882	+	NA	NA	6	-823.348	1658.7	157.275	6.22e-36
82	-11.3782	+	1.75035	NA	NA	NA	-4.58751	NA	0.245931	NA	5	-824.387	1658.78	157.353	5.98e-36
241	-6.56394	+	NA	NA	NA	NA	-4.53334	+	0.0987045	0.00275841	6	-823.391	1658.79	157.362	5.95e-36
148	-9.83977	+	1.44679	-0.415578	NA	NA	-4.57891	NA	NA	0.00603545	6	-823.406	1658.82	157.391	5.87e-36
17	-9.63179	+	NA	NA	NA	NA	-4.57949	NA	NA	NA	3	-826.454	1658.91	157.483	5.6e-36
179	-6.01359	+	NA	-0.293464	NA	NA	-4.53383	+	NA	0.00334613	6	-823.523	1659.05	157.626	5.22e-36
209	-9.70654	+	NA	NA	NA	NA	-4.56274	NA	0.0785291	0.00531121	5	-824.589	1659.18	157.756	4.89e-36
180	-6.7318	+	1.24576	-0.058968	NA	NA	-4.55704	+	NA	0.00373986	7	-822.591	1659.19	157.763	4.87e-36
147	-9.07474	+	NA	-0.744997	NA	NA	-4.5597	NA	NA	0.00566822	5	-824.606	1659.22	157.789	4.81e-36
116	-7.06069	+	1.37462	-0.263327	NA	NA	-4.55385	+	0.214638	NA	7	-822.715	1659.44	158.011	4.3e-36
115	-6.12413	+	NA	-0.46843	NA	NA	-4.53001	+	0.170805	NA	6	-823.789	1659.58	158.157	4e-36
81	-10.3432	+	NA	NA	NA	NA	-4.57242	NA	0.189137	NA	4	-825.988	1659.98	158.552	3.28e-36
20	-10.0516	+	1.51779	-0.64623	NA	NA	-4.59192	NA	NA	NA	5	-825.046	1660.1	158.671	3.09e-36
212	-10.4853	+	1.56119	-0.535999	NA	NA	-4.57676	NA	0.141446	0.00520233	7	-823.169	1660.35	158.921	2.73e-36
84	-11.0518	+	1.68177	-0.892362	NA	NA	-4.58254	NA	0.263562	NA	6	-824.293	1660.59	159.166	2.42e-36
244	-7.50301	+	1.35563	-0.174829	NA	NA	-4.55531	+	0.146269	0.00290066	8	-822.321	1660.65	159.226	2.34e-36
19	-9.26058	+	NA	-0.990045	NA	NA	-4.57456	NA	NA	NA	4	-826.343	1660.69	159.263	2.3e-36
243	-6.49922	+	NA	-0.38248	NA	NA	-4.5313	+	0.102811	0.00272472	7	-823.369	1660.75	159.321	2.24e-36
211	-9.43423	+	NA	-0.838757	NA	NA	-4.55763	NA	0.0907076	0.00510336	6	-824.495	1661	159.569	1.97e-36
83	-9.94088	+	NA	-1.24414	NA	NA	-4.56404	NA	0.21756	NA	5	-825.782	1661.57	160.141	1.48e-36
9	-13.3511	+	NA	NA	NA	1.23993	NA	NA	NA	NA	3	-834.058	1674.12	172.69	2.79e-39
105	-17.1296	+	NA	NA	NA	1.5237	NA	+	0.176043	NA	5	-832.187	1674.38	172.952	2.45e-39
41	-16.0773	+	NA	NA	NA	1.53445	NA	+	NA	NA	4	-833.252	1674.51	173.08	2.3e-39
73	-13.8115	+	NA	NA	NA	1.18563	NA	NA	0.148668	NA	4	-833.354	1674.71	173.283	2.08e-39
106	-18.4489	+	1.09724	NA	NA	1.63079	NA	+	0.213172	NA	6	-831.411	1674.83	173.401	1.96e-39
10	-13.9149	+	0.831593	NA	NA	1.29244	NA	NA	NA	NA	4	-833.581	1675.17	173.738	1.65e-39
74	-14.5806	+	0.989885	NA	NA	1.23814	NA	NA	0.178621	NA	5	-832.715	1675.43	174.007	1.45e-39
107	-16.9964	+	NA	-1.50509	NA	1.55557	NA	+	0.170401	NA	6	-831.715	1675.44	174.009	1.44e-39
42	-16.939	+	0.873577	NA	NA	1.61963	NA	+	NA	NA	5	-832.725	1675.46	174.028	1.43e-39
233	-18.0238	+	NA	NA	NA	1.65015	NA	+	0.247443	-0.00168333	6	-831.738	1675.48	174.056	1.41e-39
43	-15.9745	+	NA	-1.81734	NA	1.57651	NA	+	NA	NA	5	-832.747	1675.5	174.072	1.4e-39
234	-19.6189	+	1.17536	NA	NA	1.79157	NA	+	0.300167	-0.00201079	7	-830.864	1675.74	174.31	1.24e-39
11	-12.9452	+	NA	-0.939518	NA	1.2228	NA	NA	NA	NA	4	-833.898	1675.8	174.372	1.2e-39
201	-14.495	+	NA	NA	NA	1.2895	NA	NA	0.210578	-0.00156148	5	-833.021	1676.05	174.62	1.06e-39
137	-13.378	+	NA	NA	NA	1.24693	NA	NA	NA	-8.9e-05	4	-834.056	1676.12	174.688	1.03e-39
108	-18.1678	+	0.989753	-1.36266	NA	1.6464	NA	+	0.203981	NA	7	-831.066	1676.14	174.715	1.02e-39
235	-17.945	+	NA	-1.58137	NA	1.69163	NA	+	0.245289	-0.00177344	7	-831.189	1676.39	174.961	8.98e-40
75	-13.4642	+	NA	-0.782237	NA	1.17198	NA	NA	0.145509	NA	5	-833.218	1676.44	175.014	8.74e-40
169	-16.0707	+	NA	NA	NA	1.53245	NA	+	NA	2.79e-05	5	-833.252	1676.51	175.081	8.45e-40
44	-16.7257	+	0.769927	-1.73592	NA	1.64907	NA	+	NA	NA	6	-832.326	1676.66	175.232	7.84e-40
202	-15.4009	+	1.03427	NA	NA	1.36186	NA	NA	0.250498	-0.00181574	6	-832.331	1676.67	175.241	7.8e-40
236	-19.3565	+	1.06087	-1.44535	NA	1.8125	NA	+	0.292456	-0.00205848	8	-830.455	1676.92	175.495	6.87e-40
12	-13.5281	+	0.776534	-0.796801	NA	1.27405	NA	NA	NA	NA	5	-833.481	1676.97	175.539	6.72e-40
138	-13.9336	+	0.830955	NA	NA	1.2974	NA	NA	NA	-6.38e-05	5	-833.58	1677.17	175.739	6.08e-40
76	-14.2648	+	0.940191	-0.610545	NA	1.2241	NA	NA	0.174788	NA	6	-832.641	1677.29	175.862	5.72e-40
170	-16.9247	+	0.874249	NA	NA	1.61519	NA	+	NA	6.22e-05	6	-832.724	1677.46	176.029	5.26e-40
171	-16.0029	+	NA	-1.83413	NA	1.5853	NA	+	NA	-0.000111287	6	-832.744	1677.5	176.069	5.16e-40
203	-14.146	+	NA	-0.841565	NA	1.27853	NA	NA	0.208956	-0.00161344	6	-832.859	1677.72	176.297	4.6e-40
139	-12.9898	+	NA	-0.956095	NA	1.23581	NA	NA	NA	-0.000167665	5	-833.893	1677.79	176.364	4.45e-40
204	-15.0666	+	0.978836	-0.673824	NA	1.34841	NA	NA	0.247194	-0.00184476	7	-832.238	1678.49	177.058	3.15e-40
172	-16.7449	+	0.768682	-1.74807	NA	1.65526	NA	+	NA	-8e-05	7	-832.325	1678.66	177.232	2.88e-40
140	-13.5616	+	0.774453	-0.809864	NA	1.28419	NA	NA	NA	-0.00013317	6	-833.478	1678.96	177.536	2.48e-40
33	-5.96097	+	NA	NA	NA	NA	NA	+	NA	NA	3	-841.625	1689.25	187.824	1.44e-42
34	-6.42848	+	1.14301	NA	NA	NA	NA	+	NA	NA	4	-840.834	1689.67	188.244	1.17e-42
161	-6.84262	+	NA	NA	NA	NA	NA	+	NA	0.00317207	4	-840.869	1689.74	188.313	1.13e-42
130	-10.9015	+	1.42697	NA	NA	NA	NA	NA	NA	0.00599891	4	-841.055	1690.11	188.686	9.39e-43
162	-7.45093	+	1.16182	NA	NA	NA	NA	+	NA	0.00352339	5	-840.057	1690.12	188.692	9.37e-43
97	-7.01077	+	NA	NA	NA	NA	NA	+	0.166324	NA	4	-841.137	1690.28	188.85	8.65e-43
98	-7.85003	+	1.30373	NA	NA	NA	NA	+	0.208358	NA	5	-840.176	1690.36	188.929	8.32e-43
129	-10.2417	+	NA	NA	NA	NA	NA	NA	NA	0.00566971	3	-842.211	1690.42	188.997	8.04e-43
35	-5.86552	+	NA	-0.428237	NA	NA	NA	+	NA	NA	4	-841.598	1691.2	189.771	5.46e-43
225	-7.32095	+	NA	NA	NA	NA	NA	+	0.100189	0.00256076	5	-840.709	1691.42	189.996	4.88e-43
226	-8.21044	+	1.27759	NA	NA	NA	NA	+	0.141941	0.00270444	6	-839.78	1691.57	190.14	4.54e-43
2	-11.2468	+	1.52543	NA	NA	NA	NA	NA	NA	NA	3	-842.813	1691.63	190.201	4.4e-43
194	-11.5729	+	1.5551	NA	NA	NA	NA	NA	0.135509	0.00522097	5	-840.825	1691.65	190.227	4.35e-43
36	-6.37384	+	1.13073	-0.21986	NA	NA	NA	+	NA	NA	5	-840.828	1691.66	190.233	4.33e-43
163	-6.74765	+	NA	-0.409032	NA	NA	NA	+	NA	0.00316003	5	-840.843	1691.69	190.264	4.27e-43
132	-10.6719	+	1.38688	-0.550911	NA	NA	NA	NA	NA	0.00590692	5	-841.021	1692.05	190.619	3.57e-43
164	-7.39871	+	1.15045	-0.194936	NA	NA	NA	+	NA	0.00351364	6	-840.052	1692.11	190.683	3.46e-43
66	-12.3158	+	1.72351	NA	NA	NA	NA	NA	0.250666	NA	4	-842.065	1692.13	190.707	3.42e-43
99	-6.92895	+	NA	-0.572238	NA	NA	NA	+	0.172534	NA	5	-841.084	1692.17	190.745	3.35e-43
1	-10.5631	+	NA	NA	NA	NA	NA	NA	NA	NA	2	-844.101	1692.2	190.775	3.3e-43
131	-9.89553	+	NA	-0.874779	NA	NA	NA	NA	NA	0.00552926	4	-842.108	1692.22	190.792	3.28e-43
193	-10.5907	+	NA	NA	NA	NA	NA	NA	0.0804522	0.00517924	4	-842.116	1692.24	190.809	3.25e-43
100	-7.78316	+	1.28173	-0.381719	NA	NA	NA	+	0.212305	NA	6	-840.154	1692.31	190.888	3.12e-43
65	-11.2631	+	NA	NA	NA	NA	NA	NA	0.196573	NA	3	-843.584	1693.17	191.743	2.04e-43
227	-7.23442	+	NA	-0.491663	NA	NA	NA	+	0.10515	0.00251849	6	-840.67	1693.35	191.92	1.86e-43
4	-10.9355	+	1.47162	-0.771318	NA	NA	NA	NA	NA	NA	4	-842.754	1693.51	192.084	1.72e-43
196	-11.3192	+	1.5056	-0.666479	NA	NA	NA	NA	0.143284	0.00505384	6	-840.768	1693.54	192.116	1.69e-43
228	-8.14596	+	1.26059	-0.298439	NA	NA	NA	+	0.144625	0.00267458	7	-839.767	1693.54	192.117	1.69e-43
68	-11.9213	+	1.63513	-1.02782	NA	NA	NA	NA	0.271292	NA	5	-841.933	1693.87	192.444	1.43e-43
3	-10.1285	+	NA	-1.11597	NA	NA	NA	NA	NA	NA	3	-843.952	1693.91	192.478	1.41e-43
195	-10.2617	+	NA	-0.97022	NA	NA	NA	NA	0.0947986	0.00492877	5	-841.982	1693.97	192.541	1.37e-43
67	-10.793	+	NA	-1.38591	NA	NA	NA	NA	0.228106	NA	4	-843.315	1694.63	193.205	9.8e-44

## Sheet: Elephant
	cond((Int))	disp((Int))	cond(All_Livestock_1)	cond(Dist_Road_K)	cond(Fencing_2)	cond(Height_meters)	cond(ndvi)	cond(Underpass_type)	cond(Water_source)	cond(Width_meters)	df	logLik	AICc	delta	weight
109	-4.03311	+	NA	NA	-0.45899	0.511571	NA	-1.26086	-0.058916	NA	6	-2625.15	5262.3	0	0.125237
45	-4.35049	+	NA	NA	+	0.506585	NA	+	NA	NA	5	-2626.52	5263.05	0.745274	0.0862777			Family: binomial ( logit )
125	-4.09841	+	NA	NA	+	0.508287	0.391063	+	-0.0587766	NA	7	-2624.67	5263.34	1.03763	0.0745442			Formula: Elephants_1 ~ ndvi + Dist_Road_K + Fencing_2 + Water_source + Underpass_type + All_Livestock_1 + Width_meters + Height_meters + (1 | Unique_ID)
111	-4.04941	+	NA	0.288297	+	0.50857	NA	+	-0.0620876	NA	7	-2624.86	5263.73	1.43058	0.0612472			Data: nomitdata
61	-4.41573	+	NA	NA	+	0.503247	0.39629	+	NA	NA	6	-2626.03	5264.06	1.75665	0.0520332
237	-3.93995	+	NA	NA	+	0.496338	NA	+	-0.0667086	0.000246944	7	-2625.06	5264.12	1.82219	0.0503559			AIC BIC logLik deviance df.resid
110	-4.017	+	-0.0422202	NA	+	0.510722	NA	+	-0.0598897	NA	7	-2625.09	5264.19	1.89097	0.0486535			5268.4 5342.3 -2624.2 5248.4 11900
47	-4.37378	+	NA	0.217571	+	0.503849	NA	+	NA	NA	6	-2626.36	5264.73	2.42418	0.0372674
127	-4.1131	+	NA	0.279412	+	0.505468	0.383542	+	-0.0618578	NA	8	-2624.4	5264.81	2.50591	0.0357751			Random effects:
173	-4.39388	+	NA	NA	+	0.520085	NA	+	NA	-0.000210231	6	-2626.44	5264.89	2.58771	0.0343415
46	-4.34388	+	-0.0271515	NA	+	0.506044	NA	+	NA	NA	6	-2626.5	5265	2.70124	0.0324464			Conditional model:
253	-4.00263	+	NA	NA	+	0.492541	0.39329	+	-0.0668164	0.000255061	8	-2624.57	5265.15	2.84922	0.0301323			Groups Name Variance Std.Dev.
126	-4.08219	+	-0.0430447	NA	+	0.50743	0.391873	+	-0.0597696	NA	8	-2624.61	5265.23	2.92459	0.029018			Unique_ID (Intercept) 0.7777 0.8819
239	-3.94152	+	NA	0.304042	+	0.490632	NA	+	-0.0713912	0.000288754	8	-2624.74	5265.49	3.18963	0.0254163			Number of obs: 11910, groups: Unique_ID, 72
112	-4.03432	+	-0.0394096	0.28519	+	0.50783	NA	+	-0.0629641	NA	8	-2624.81	5265.64	3.33646	0.0236173
63	-4.4373	+	NA	0.20878	+	0.500683	0.390965	+	NA	NA	7	-2625.88	5265.76	3.46287	0.0221707			Conditional model:
189	-4.45722	+	NA	NA	+	0.516294	0.393972	+	NA	-0.000202884	7	-2625.95	5265.91	3.61115	0.0205864				Estimate	Std. Error	z value	Pr(>|z|)
238	-3.92188	+	-0.0432966	NA	+	0.495205	NA	+	-0.0678389	0.000251502	8	-2625	5266.01	3.70768	0.0196165			(Intercept)	-3.98594	0.780453	-5.107	3.27e-07	***
62	-4.40898	+	-0.0280907	NA	+	0.502682	0.396883	+	NA	NA	7	-2626	5266.01	3.70974	0.0195963			ndvi	0.386513	0.395998	0.976	0.32904
255	-4.00306	+	NA	0.295447	+	0.487096	0.38563	+	-0.071369	0.000295446	9	-2624.27	5266.56	4.25523	0.0149184			Dist_Road_K	0.292352	0.383994	0.761	0.44645
175	-4.41538	+	NA	0.213983	+	0.516942	NA	+	NA	-0.000202962	7	-2626.29	5266.58	4.27831	0.0147472			Fencing_2Y	-0.474478	0.0796974	-5.953	2.62e-09	***
48	-4.36757	+	-0.0245017	0.21507	+	0.503396	NA	+	NA	NA	7	-2626.34	5266.69	4.38914	0.0139522			Water_source	-0.0724117	0.0408602	-1.772	0.07636	.
128	-4.09783	+	-0.0403159	0.276222	+	0.504715	0.384383	+	-0.062757	NA	9	-2624.35	5266.71	4.40767	0.0138236			Underpass_typeCulvert	-1.34673	0.418605	-3.217	0.00129	**
174	-4.38745	+	-0.0279354	NA	+	0.519657	NA	+	NA	-0.000212408	7	-2626.42	5266.84	4.54132	0.01293			All_Livestock_1	-0.0414148	0.126843	-0.327	0.74404
254	-3.98431	+	-0.0441496	NA	+	0.49138	0.394137	+	-0.0679743	0.000259693	9	-2624.51	5267.03	4.73045	0.0117633			Width_meters	0.0002994	0.0005859	0.511	0.60938
240	-3.92461	+	-0.0404921	0.301037	+	0.489636	NA	+	-0.072409	0.000292565	9	-2624.69	5267.39	5.09041	0.00982572			Height_meters	0.486077	0.103287	4.706	2.53e-06	***
191	-4.47714	+	NA	0.205385	+	0.513345	0.38884	+	NA	-0.000196028	8	-2625.81	5267.63	5.328	0.00872513			---
64	-4.43094	+	-0.0255465	0.206148	+	0.500208	0.391588	+	NA	NA	8	-2625.86	5267.73	5.42493	0.00831236			Signif. codes: 0 ‘***’ 0.001 ‘**’ 0.01 ‘*’ 0.05 ‘.’ 0.1 ‘ ’ 1
190	-4.4507	+	-0.0288471	NA	+	0.515851	0.394573	+	NA	-0.000205133	8	-2625.93	5267.86	5.5619	0.00776215
256	-3.98594	+	-0.0414148	0.292352	+	0.486077	0.386513	+	-0.0724117	0.000299368	10	-2624.22	5268.45	6.15169	0.00577976
176	-4.40933	+	-0.0253104	0.211373	+	0.516597	NA	+	NA	-0.000205025	8	-2626.27	5268.54	6.24111	0.00552705
13	-6.3283	+	NA	NA	+	0.725552	NA	NA	NA	NA	4	-2630.36	5268.71	6.41258	0.00507293			Family: binomial ( logit )
77	-6.11682	+	NA	NA	+	0.738798	NA	NA	-0.0536733	NA	5	-2629.41	5268.82	6.51953	0.00480878			Formula:
192	-4.47099	+	-0.0263273	0.202637	+	0.512988	0.389456	+	NA	-0.000198178	9	-2625.79	5269.59	7.28789	0.00327482			Elephants_1 ~ Fencing_2 + Water_source + Underpass_type + Height_meters +
29	-6.41397	+	NA	NA	+	0.725365	0.363038	NA	NA	NA	5	-2629.94	5269.89	7.58323	0.00282525			(1 | Unique_ID)
93	-6.2019	+	NA	NA	+	0.738585	0.357311	NA	-0.0535051	NA	6	-2629.01	5270.02	7.71664	0.00264293			Data: nomitdata
205	-6.00532	+	NA	NA	+	0.720922	NA	NA	-0.0623854	0.000279398	6	-2629.31	5270.64	8.3337	0.0019413
141	-6.36913	+	NA	NA	+	0.73614	NA	NA	NA	-0.0001476	5	-2630.32	5270.65	8.34925	0.00192627			AIC BIC logLik deviance df.resid
14	-6.32731	+	-0.0226805	NA	+	0.725593	NA	NA	NA	NA	5	-2630.34	5270.68	8.38227	0.00189472			5262.3 5306.6 -2625.1 5250.3 11904
15	-6.33575	+	NA	0.01555	+	0.725997	NA	NA	NA	NA	5	-2630.35	5270.71	8.41281	0.00186601
78	-6.11212	+	-0.0337554	NA	+	0.739012	NA	NA	-0.0544372	NA	6	-2629.37	5270.75	8.45068	0.00183102			Random effects:
79	-6.14751	+	NA	0.0694485	+	0.741021	NA	NA	-0.0544062	NA	6	-2629.39	5270.79	8.49265	0.00179298
221	-6.08776	+	NA	NA	+	0.720202	0.359353	NA	-0.0624576	0.000287323	7	-2628.91	5271.82	9.52198	0.00107167			Conditional model:
157	-6.45237	+	NA	NA	+	0.735415	0.361565	NA	NA	-0.00014008	6	-2629.91	5271.83	9.52716	0.0010689			Groups Name Variance Std.Dev.
30	-6.4131	+	-0.0237318	NA	+	0.725411	0.363674	NA	NA	NA	6	-2629.92	5271.85	9.55024	0.00105663			Unique_ID (Intercept) 0.7753 0.8805
31	-6.41657	+	NA	0.00550132	+	0.725524	0.362884	NA	NA	NA	6	-2629.94	5271.89	9.58506	0.0010384			Number of obs: 11910, groups: Unique_ID, 72
94	-6.1973	+	-0.0346925	NA	+	0.738812	0.358139	NA	-0.0542896	NA	7	-2628.97	5271.95	9.64418	0.00100815
95	-6.22782	+	NA	0.0594113	+	0.740498	0.355697	NA	-0.054131	NA	7	-2629	5272	9.69803	0.000981368			Conditional model:
206	-5.99895	+	-0.0347838	NA	+	0.720895	NA	NA	-0.0632895	0.000283304	7	-2629.28	5272.56	10.2608	0.000740687				Estimate	Std. Error	z value	Pr(>|z|)
207	-6.0382	+	NA	0.0856572	+	0.72287	NA	NA	-0.0636846	0.000291951	7	-2629.29	5272.59	10.2922	0.000729122			(Intercept)	-4.03311	0.74478	-5.415	6.12e-08	***
142	-6.36854	+	-0.0230865	NA	+	0.736292	NA	NA	NA	-0.000149163	6	-2630.31	5272.62	10.3181	0.000719749			Fencing_2Y	-0.45899	0.07481	-6.135	8.52e-10	***
143	-6.37474	+	NA	0.0120319	+	0.736446	NA	NA	NA	-0.000147062	6	-2630.32	5272.65	10.3504	0.000708227			Water_source	-0.05892	0.03558	-1.656	0.09773	.
16	-6.33352	+	-0.0225356	0.0129399	+	0.725964	NA	NA	NA	NA	6	-2630.34	5272.69	10.3833	0.000696676			Underpass_typeCulvert	-1.26086	0.40776	-3.092	0.00199	**
80	-6.14148	+	-0.0331295	0.0662477	+	0.741127	NA	NA	-0.0551231	NA	7	-2629.36	5272.73	10.4268	0.000681667			Height_meters	0.51157	0.09665	5.293	1.2e-07	***
222	-6.08148	+	-0.0357395	NA	+	0.720179	0.360233	NA	-0.0633811	0.000291293	8	-2628.87	5273.75	11.4452	0.000409667			---
223	-6.1165	+	NA	0.0758814	+	0.721946	0.357352	NA	-0.0636078	0.00029827	8	-2628.89	5273.79	11.4905	0.00040049			Signif. codes: 0 ‘***’ 0.001 ‘**’ 0.01 ‘*’ 0.05 ‘.’ 0.1 ‘ ’ 1
158	-6.45193	+	-0.0241161	NA	+	0.735576	0.362208	NA	NA	-0.000141694	7	-2629.89	5273.8	11.4934	0.000399926
159	-6.45339	+	NA	0.00220402	+	0.735472	0.361508	NA	NA	-0.000139984	7	-2629.91	5273.83	11.5295	0.00039277
32	-6.41439	+	-0.0237021	0.00272845	+	0.725489	0.3636	NA	NA	NA	7	-2629.92	5273.85	11.5525	0.000388266
96	-6.22181	+	-0.0341625	0.0560637	+	0.740609	0.356605	NA	-0.0548714	NA	8	-2628.96	5273.93	11.6283	0.00037384
208	-6.03074	+	-0.0340391	0.0825159	+	0.722773	NA	NA	-0.0645246	0.000295329	8	-2629.26	5274.52	12.2229	0.000277686
144	-6.3729	+	-0.022981	0.00933502	+	0.736528	NA	NA	NA	-0.000148737	7	-2630.31	5274.62	12.32	0.000264538
224	-6.10907	+	-0.0350862	0.0726798	+	0.721844	0.358303	NA	-0.0644704	0.000301789	9	-2628.85	5275.72	13.4171	0.000152841
160	-6.45162	+	-0.0241226	-0.000664673	+	0.735558	0.362211	NA	NA	-0.00014173	8	-2629.89	5275.8	13.4961	0.000146927
229	-0.526425	+	NA	NA	+	NA	NA	+	-0.0905477	0.00123984	6	-2636.4	5284.8	22.5022	1.63e-06
245	-0.633138	+	NA	NA	+	NA	0.471501	+	-0.0903987	0.00124	7	-2635.7	5285.41	23.1056	1.2e-06
231	-0.593035	+	NA	0.490308	+	NA	NA	+	-0.0974433	0.00128724	7	-2635.74	5285.49	23.1906	1.15e-06
247	-0.695489	+	NA	0.477847	+	NA	0.460494	+	-0.0971297	0.00128621	8	-2635.07	5286.16	23.8592	8.26e-07
37	-0.760996	+	NA	NA	+	NA	NA	+	NA	NA	4	-2639.09	5286.19	23.8904	8.13e-07
230	-0.509442	+	-0.0733507	NA	+	NA	NA	+	-0.0922857	0.00124299	7	-2636.23	5286.47	24.166	7.08e-07
101	-0.444055	+	NA	NA	+	NA	NA	+	-0.0529495	NA	5	-2638.27	5286.54	24.2377	6.83e-07
53	-0.866751	+	NA	NA	+	NA	0.471512	+	NA	NA	5	-2638.4	5286.8	24.4939	6.01e-07
165	-0.928231	+	NA	NA	+	NA	NA	+	NA	0.00067443	5	-2638.44	5286.88	24.5831	5.75e-07
246	-0.616153	+	-0.0743803	NA	+	NA	0.472886	+	-0.0921669	0.00124333	8	-2635.53	5287.06	24.7603	5.26e-07
117	-0.550541	+	NA	NA	+	NA	0.470125	+	-0.0527746	NA	6	-2637.57	5287.15	24.8497	5.03e-07
232	-0.576102	+	-0.0692287	0.483941	+	NA	NA	+	-0.0990025	0.00128974	8	-2635.59	5287.19	24.8925	4.92e-07
39	-0.834989	+	NA	0.377535	+	NA	NA	+	NA	NA	5	-2638.73	5287.46	25.1578	4.31e-07
181	-1.03448	+	NA	NA	+	NA	0.472681	+	NA	0.000675435	6	-2637.74	5287.48	25.1796	4.27e-07
103	-0.50285	+	NA	0.444677	+	NA	NA	+	-0.0576866	NA	6	-2637.76	5287.52	25.2217	4.18e-07
248	-0.67852	+	-0.0703061	0.471305	+	NA	0.461929	+	-0.0987208	0.00128874	9	-2634.92	5287.85	25.5522	3.54e-07
38	-0.754791	+	-0.0615614	NA	+	NA	NA	+	NA	NA	5	-2638.98	5287.96	25.6538	3.37e-07
55	-0.936623	+	NA	0.365462	+	NA	0.46384	+	NA	NA	6	-2638.05	5288.11	25.8072	3.12e-07
167	-1.00292	+	NA	0.376822	+	NA	NA	+	NA	0.000677722	6	-2638.06	5288.14	25.8338	3.08e-07
119	-0.605531	+	NA	0.432295	+	NA	0.460774	+	-0.0573894	NA	7	-2637.09	5288.19	25.8892	2.99e-07
102	-0.427089	+	-0.0723349	NA	+	NA	NA	+	-0.0545669	NA	6	-2638.1	5288.21	25.9112	2.96e-07
54	-0.860683	+	-0.0626726	NA	+	NA	0.472801	+	NA	NA	6	-2638.27	5288.55	26.2491	2.5e-07
166	-0.920913	+	-0.0577364	NA	+	NA	NA	+	NA	0.000668436	6	-2638.34	5288.68	26.3758	2.35e-07
183	-1.10497	+	NA	0.364612	+	NA	0.464846	+	NA	0.000678657	7	-2637.38	5288.78	26.4774	2.23e-07
118	-0.533584	+	-0.0734312	NA	+	NA	0.471618	+	-0.0544226	NA	7	-2637.4	5288.82	26.5137	2.19e-07
104	-0.48581	+	-0.0687721	0.438279	+	NA	NA	+	-0.0591655	NA	7	-2637.61	5289.23	26.9279	1.78e-07
40	-0.827834	+	-0.0577896	0.370841	+	NA	NA	+	NA	NA	6	-2638.62	5289.25	26.9505	1.76e-07
182	-1.02728	+	-0.0587924	NA	+	NA	0.473828	+	NA	0.000669368	7	-2637.63	5289.27	26.9649	1.75e-07
120	-0.588475	+	-0.0699238	0.425716	+	NA	0.462321	+	-0.0588991	NA	8	-2636.94	5289.89	27.5858	1.28e-07
56	-0.929611	+	-0.0589804	0.358535	+	NA	0.465193	+	NA	NA	7	-2637.94	5289.89	27.5916	1.28e-07
168	-0.994846	+	-0.0538251	0.370642	+	NA	NA	+	NA	0.000672077	7	-2637.97	5289.96	27.6548	1.24e-07
184	-1.09698	+	-0.0549695	0.358329	+	NA	0.466025	+	NA	0.000672891	8	-2637.29	5290.59	28.291	9e-08
106	-4.14269	+	-0.210642	NA	NA	0.506735	NA	+	-0.0635422	NA	6	-2642.85	5297.72	35.4137	2.56e-09
105	-4.23469	+	NA	NA	NA	0.510569	NA	+	-0.0584295	NA	5	-2644.31	5298.63	36.3304	1.62e-09
42	-4.492	+	-0.195589	NA	NA	0.502016	NA	+	NA	NA	5	-2644.42	5298.85	36.5433	1.45e-09
108	-4.15924	+	-0.208461	0.266948	NA	0.504081	NA	+	-0.0664502	NA	7	-2642.61	5299.23	36.9321	1.2e-09
122	-4.09799	+	-0.205523	NA	NA	0.508903	-0.246245	+	-0.0634908	NA	7	-2642.65	5299.3	36.999	1.16e-09
41	-4.54905	+	NA	NA	NA	0.505571	NA	+	NA	NA	4	-2645.68	5299.36	37.0548	1.13e-09
234	-4.04313	+	-0.211708	NA	NA	0.490486	NA	+	-0.07186	0.000263389	7	-2642.75	5299.52	37.214	1.04e-09
121	-4.18008	+	NA	NA	NA	0.513007	-0.286698	+	-0.0585323	NA	6	-2644.03	5300.07	37.7659	7.89e-10
107	-4.25077	+	NA	0.281821	NA	0.507647	NA	+	-0.0615328	NA	6	-2644.04	5300.08	37.7818	7.83e-10
58	-4.44734	+	-0.190454	NA	NA	0.504182	-0.244784	+	NA	NA	6	-2644.21	5300.43	38.1331	6.56e-10
233	-4.14422	+	NA	NA	NA	0.495778	NA	+	-0.0659991	0.000239665	6	-2644.23	5300.46	38.1612	6.47e-10
44	-4.51366	+	-0.193553	0.193116	NA	0.499676	NA	+	NA	NA	6	-2644.29	5300.6	38.295	6.05e-10
170	-4.53849	+	-0.196375	NA	NA	0.516616	NA	+	NA	-0.000228506	6	-2644.33	5300.66	38.3604	5.86e-10
124	-4.11338	+	-0.203093	0.274181	NA	0.506225	-0.254391	+	-0.0664712	NA	8	-2642.39	5300.79	38.49	5.49e-10
57	-4.49596	+	NA	NA	NA	0.507993	-0.282508	+	NA	NA	5	-2645.4	5300.81	38.5062	5.45e-10
236	-4.04614	+	-0.20953	0.283285	NA	0.485309	NA	+	-0.0761885	0.000302075	8	-2642.48	5300.97	38.672	5.01e-10
43	-4.57184	+	NA	0.211725	NA	0.502923	NA	+	NA	NA	5	-2645.52	5301.05	38.748	4.83e-10
250	-4.00091	+	-0.206625	NA	NA	0.492974	-0.243938	+	-0.0716361	0.000257828	8	-2642.55	5301.11	38.8075	4.69e-10
169	-4.59292	+	NA	NA	NA	0.519229	NA	+	NA	-0.000212662	5	-2645.59	5301.19	38.8915	4.49e-10
123	-4.19489	+	NA	0.289789	NA	0.510058	-0.294928	+	-0.0617264	NA	7	-2643.74	5301.49	39.1849	3.88e-10
235	-4.14591	+	NA	0.297121	NA	0.490216	NA	+	-0.0705775	0.000280473	7	-2643.92	5301.85	39.5522	3.23e-10
249	-4.09223	+	NA	NA	NA	0.498569	-0.284742	+	-0.0659182	0.000233826	7	-2643.95	5301.91	39.6048	3.15e-10
60	-4.46864	+	-0.188217	0.200221	NA	0.501791	-0.250552	+	NA	NA	7	-2644.08	5302.17	39.8659	2.76e-10
186	-4.49425	+	-0.191215	NA	NA	0.519062	-0.246978	+	NA	-0.000232627	7	-2644.12	5302.25	39.9433	2.66e-10
172	-4.55847	+	-0.194365	0.189118	NA	0.513925	NA	+	NA	-0.000222071	7	-2644.21	5302.43	40.1234	2.43e-10
59	-4.51831	+	NA	0.219327	NA	0.505279	-0.288441	+	NA	NA	6	-2645.24	5302.48	40.1767	2.36e-10
252	-4.00245	+	-0.204202	0.290219	NA	0.487736	-0.252285	+	-0.0760597	0.000297287	9	-2642.26	5302.54	40.2377	2.29e-10
185	-4.54047	+	NA	NA	NA	0.522009	-0.284766	+	NA	-0.000217963	6	-2645.31	5302.64	40.3345	2.18e-10
171	-4.61399	+	NA	0.2081	NA	0.516192	NA	+	NA	-0.000205645	6	-2645.45	5302.9	40.5963	1.92e-10
251	-4.09226	+	NA	0.30482	NA	0.492919	-0.293123	+	-0.070609	0.000275545	8	-2643.63	5303.26	40.9631	1.59e-10
188	-4.51391	+	-0.188998	0.196192	NA	0.516311	-0.252537	+	NA	-0.000225965	8	-2643.99	5303.99	41.6878	1.11e-10
187	-4.56117	+	NA	0.215625	NA	0.518898	-0.290506	+	NA	-0.000210711	7	-2645.15	5304.32	42.0172	9.42e-11
74	-6.26518	+	-0.203278	NA	NA	0.738017	NA	NA	-0.0580787	NA	5	-2647.2	5304.4	42.0976	9.04e-11
10	-6.49634	+	-0.192148	NA	NA	0.723848	NA	NA	NA	NA	4	-2648.28	5304.57	42.2678	8.31e-11
9	-6.51216	+	NA	NA	NA	0.72297	NA	NA	NA	NA	3	-2649.49	5304.98	42.6815	6.75e-11
73	-6.30253	+	NA	NA	NA	0.736133	NA	NA	-0.0532412	NA	4	-2648.55	5305.1	42.801	6.36e-11
90	-6.19401	+	-0.197339	NA	NA	0.738199	-0.278357	NA	-0.058051	NA	6	-2646.93	5305.87	43.567	4.34e-11
26	-6.42589	+	-0.186218	NA	NA	0.724044	-0.2754	NA	NA	NA	5	-2648.02	5306.05	43.748	3.96e-11
202	-6.14699	+	-0.204297	NA	NA	0.719086	NA	NA	-0.0673174	0.000296111	6	-2647.09	5306.19	43.8923	3.69e-11
25	-6.43167	+	NA	NA	NA	0.72325	-0.313191	NA	NA	NA	4	-2649.15	5306.31	44.0065	3.48e-11
76	-6.28575	+	-0.202914	0.0462976	NA	0.739504	NA	NA	-0.0585627	NA	6	-2647.19	5306.39	44.087	3.34e-11
89	-6.22015	+	NA	NA	NA	0.736445	-0.318081	NA	-0.0533887	NA	5	-2648.2	5306.41	44.1054	3.31e-11
138	-6.54157	+	-0.192562	NA	NA	0.735607	NA	NA	NA	-0.000164214	5	-2648.24	5306.49	44.1906	3.18e-11
12	-6.49144	+	-0.192245	-0.010185	NA	0.723555	NA	NA	NA	NA	5	-2648.28	5306.57	44.2688	3.05e-11
137	-6.55387	+	NA	NA	NA	0.733794	NA	NA	NA	-0.000150878	4	-2649.46	5306.92	44.6141	2.57e-11
201	-6.1942	+	NA	NA	NA	0.718764	NA	NA	-0.0617132	0.000271471	5	-2648.46	5306.93	44.6235	2.56e-11
11	-6.51751	+	NA	0.0111832	NA	0.72329	NA	NA	NA	NA	4	-2649.49	5306.98	44.6821	2.48e-11
75	-6.33112	+	NA	0.064581	NA	0.738205	NA	NA	-0.0539216	NA	5	-2648.54	5307.08	44.7775	2.37e-11
218	-6.07902	+	-0.198396	NA	NA	0.719698	-0.276251	NA	-0.0670843	0.000289322	7	-2646.83	5307.67	45.3702	1.76e-11
92	-6.21835	+	-0.196862	0.0557371	NA	0.739989	-0.279991	NA	-0.0586317	NA	7	-2646.92	5307.85	45.551	1.61e-11
154	-6.47216	+	-0.186611	NA	NA	0.736177	-0.276905	NA	NA	-0.000169424	6	-2647.98	5307.97	45.6656	1.52e-11
28	-6.42545	+	-0.18623	-0.000930808	NA	0.724017	-0.275375	NA	NA	NA	6	-2648.02	5308.05	45.75	1.46e-11
204	-6.17142	+	-0.203829	0.0630922	NA	0.720539	NA	NA	-0.068266	0.000305359	7	-2647.08	5308.17	45.8713	1.37e-11
153	-6.4748	+	NA	NA	NA	0.734542	-0.314704	NA	NA	-0.000157328	5	-2649.11	5308.23	45.9331	1.33e-11
217	-6.11497	+	NA	NA	NA	0.719511	-0.316283	NA	-0.0616521	0.000264625	6	-2648.12	5308.24	45.9362	1.33e-11
27	-6.44157	+	NA	0.0209694	NA	0.723853	-0.313771	NA	NA	NA	5	-2649.15	5308.31	46.0055	1.28e-11
91	-6.25266	+	NA	0.0747814	NA	0.738838	-0.320199	NA	-0.0541742	NA	6	-2648.18	5308.38	46.0735	1.24e-11
140	-6.5349	+	-0.192697	-0.0141755	NA	0.735241	NA	NA	NA	-0.000164824	6	-2648.24	5308.49	46.1914	1.17e-11
203	-6.22507	+	NA	0.0803259	NA	0.720594	NA	NA	-0.0629333	0.00028324	6	-2648.44	5308.89	46.5867	9.58e-12
139	-6.5574	+	NA	0.00755985	NA	0.733987	NA	NA	NA	-0.000150534	5	-2649.46	5308.92	46.6155	9.45e-12
220	-6.10642	+	-0.197804	0.0722217	NA	0.721356	-0.278304	NA	-0.0681683	0.000299809	8	-2646.82	5309.64	47.3421	6.57e-12
156	-6.46985	+	-0.186665	-0.00500831	NA	0.736049	-0.276761	NA	NA	-0.000169651	7	-2647.98	5309.97	47.6678	5.58e-12
219	-6.14898	+	NA	0.0901957	NA	0.721565	-0.318786	NA	-0.0630162	0.000277807	7	-2648.09	5310.19	47.8894	5e-12
155	-6.48273	+	NA	0.0172829	NA	0.734979	-0.315185	NA	NA	-0.000156537	6	-2649.11	5310.24	47.9333	4.89e-12
226	-0.662507	+	-0.240912	NA	NA	NA	NA	+	-0.095909	0.00124461	6	-2653.71	5319.42	57.1229	4.94e-14
228	-0.726378	+	-0.237506	0.46363	NA	NA	NA	+	-0.102383	0.00128945	7	-2653.12	5320.26	57.9562	3.26e-14
34	-0.929697	+	-0.2291	NA	NA	NA	NA	+	NA	NA	4	-2656.57	5321.15	58.8442	2.09e-14
98	-0.579964	+	-0.240067	NA	NA	NA	NA	+	-0.058133	NA	5	-2655.58	5321.17	58.8716	2.06e-14
242	-0.621228	+	-0.237375	NA	NA	NA	-0.169234	+	-0.0958608	0.00124438	7	-2653.61	5321.23	58.9285	2e-14
225	-0.734576	+	NA	NA	NA	NA	NA	+	-0.0898537	0.00123157	5	-2655.63	5321.27	58.9696	1.96e-14
162	-1.09082	+	-0.225507	NA	NA	NA	NA	+	NA	0.000647289	5	-2655.98	5321.96	59.6533	1.39e-14
227	-0.800355	+	NA	0.483721	NA	NA	NA	+	-0.0966552	0.00127828	6	-2654.99	5321.99	59.6848	1.37e-14
244	-0.683026	+	-0.233683	0.469541	NA	NA	-0.181075	+	-0.102412	0.00128975	8	-2653.01	5322.04	59.7337	1.34e-14
100	-0.636011	+	-0.237137	0.417937	NA	NA	NA	+	-0.0625461	NA	6	-2655.14	5322.28	59.9791	1.18e-14
36	-0.998201	+	-0.22599	0.346836	NA	NA	NA	+	NA	NA	5	-2656.26	5322.53	60.232	1.04e-14
33	-0.966871	+	NA	NA	NA	NA	NA	+	NA	NA	3	-2658.31	5322.62	60.3173	1e-14
50	-0.88741	+	-0.225482	NA	NA	NA	-0.172531	+	NA	NA	5	-2656.47	5322.94	60.6415	8.5e-15
241	-0.680297	+	NA	NA	NA	NA	-0.216723	+	-0.0899191	0.00123157	6	-2655.47	5322.95	60.6485	8.47e-15
114	-0.538307	+	-0.236463	NA	NA	NA	-0.171092	+	-0.0580941	NA	6	-2655.48	5322.97	60.6726	8.37e-15
97	-0.652787	+	NA	NA	NA	NA	NA	+	-0.0524751	NA	4	-2657.49	5322.98	60.6825	8.33e-15
161	-1.13317	+	NA	NA	NA	NA	NA	+	NA	0.000670436	4	-2657.66	5323.32	61.0147	7.06e-15
164	-1.16016	+	-0.22229	0.346733	NA	NA	NA	+	NA	0.000650648	6	-2655.66	5323.33	61.0265	7.01e-15
243	-0.744147	+	NA	0.4908	NA	NA	-0.228258	+	-0.0968146	0.00127888	7	-2654.81	5323.63	61.3288	6.03e-15
178	-1.04861	+	-0.221907	NA	NA	NA	-0.172258	+	NA	0.000647341	6	-2655.87	5323.75	61.4515	5.67e-15
35	-1.03977	+	NA	0.371814	NA	NA	NA	+	NA	NA	4	-2657.95	5323.9	61.6017	5.26e-15
99	-0.710794	+	NA	0.438365	NA	NA	NA	+	-0.0571464	NA	5	-2656.99	5323.99	61.6885	5.04e-15
116	-0.592644	+	-0.233275	0.423819	NA	NA	-0.18116	+	-0.0625675	NA	7	-2655.02	5324.06	61.7562	4.87e-15
197	-2.72451	+	NA	NA	+	NA	NA	NA	-0.114557	0.00324416	5	-2657.11	5324.22	61.9174	4.49e-15
49	-0.912716	+	NA	NA	NA	NA	-0.217789	+	NA	NA	4	-2658.15	5324.29	61.9924	4.33e-15
52	-0.955035	+	-0.222134	0.352676	NA	NA	-0.180807	+	NA	NA	6	-2656.15	5324.31	62.0095	4.29e-15
163	-1.20674	+	NA	0.371141	NA	NA	NA	+	NA	0.000673716	5	-2657.29	5324.58	62.2828	3.74e-15
113	-0.597944	+	NA	NA	NA	NA	-0.218713	+	-0.0525525	NA	5	-2657.33	5324.66	62.3552	3.61e-15
177	-1.07924	+	NA	NA	NA	NA	-0.216508	+	NA	0.000670124	5	-2657.5	5325	62.6939	3.05e-15
213	-2.82843	+	NA	NA	+	NA	0.437435	NA	-0.114499	0.00324928	6	-2656.51	5325.02	62.72	3.01e-15
180	-1.11702	+	-0.218457	0.35257	NA	NA	-0.180757	+	NA	0.000650807	7	-2655.55	5325.11	62.8045	2.88e-15
133	-3.27393	+	NA	NA	+	NA	NA	NA	NA	0.00256213	4	-2658.76	5325.53	63.2305	2.33e-15
51	-0.984911	+	NA	0.378565	NA	NA	-0.22596	+	NA	NA	5	-2657.77	5325.55	63.2522	2.31e-15
115	-0.654428	+	NA	0.445384	NA	NA	-0.228575	+	-0.0572988	NA	6	-2656.81	5325.63	63.3312	2.22e-15
198	-2.71221	+	-0.0701657	NA	+	NA	NA	NA	-0.116227	0.00325056	6	-2656.95	5325.91	63.6119	1.93e-15
199	-2.70135	+	NA	-0.0832912	+	NA	NA	NA	-0.113251	0.00322529	6	-2657.1	5326.2	63.8995	1.67e-15
179	-1.15206	+	NA	0.377865	NA	NA	-0.224874	+	NA	0.000673328	6	-2657.12	5326.24	63.9369	1.64e-15
149	-3.37796	+	NA	NA	+	NA	0.43912	NA	NA	0.00256736	5	-2658.16	5326.33	64.0234	1.57e-15
214	-2.81641	+	-0.0717663	NA	+	NA	0.439842	NA	-0.11621	0.00325528	7	-2656.35	5326.7	64.4007	1.3e-15
215	-2.80232	+	NA	-0.0954603	+	NA	0.438654	NA	-0.112972	0.00322687	7	-2656.49	5327	64.6963	1.12e-15
134	-3.27035	+	-0.0604126	NA	+	NA	NA	NA	NA	0.00255915	5	-2658.65	5327.31	65.0046	9.6e-16
135	-3.19542	+	NA	-0.223005	+	NA	NA	NA	NA	0.00253253	5	-2658.69	5327.39	65.0918	9.19e-16
200	-2.68699	+	-0.0705726	-0.0904054	+	NA	NA	NA	-0.114821	0.00323007	7	-2656.94	5327.89	65.5909	7.16e-16
150	-3.37479	+	-0.0620307	NA	+	NA	0.441257	NA	NA	0.00256442	6	-2658.04	5328.09	65.7856	6.5e-16
151	-3.29591	+	NA	-0.234949	+	NA	0.442001	NA	NA	0.00253634	6	-2658.08	5328.17	65.8698	6.23e-16
216	-2.78811	+	-0.0722275	-0.102852	+	NA	0.441175	NA	-0.114594	0.0032323	8	-2656.33	5328.68	66.3733	4.84e-16
136	-3.18906	+	-0.061641	-0.230714	+	NA	NA	NA	NA	0.00252844	6	-2658.58	5329.16	66.8569	3.8e-16
152	-3.28982	+	-0.0633376	-0.243046	+	NA	0.444248	NA	NA	0.00253211	7	-2657.96	5329.92	67.622	2.59e-16
5	-3.16263	+	NA	NA	+	NA	NA	NA	NA	NA	3	-2663.74	5333.49	71.1901	4.36e-17
21	-3.26534	+	NA	NA	+	NA	0.434459	NA	NA	NA	4	-2663.15	5334.31	72.0089	2.89e-17
7	-3.02982	+	NA	-0.384556	+	NA	NA	NA	NA	NA	4	-2663.57	5335.13	72.8326	1.92e-17
6	-3.15863	+	-0.0678324	NA	+	NA	NA	NA	NA	NA	4	-2663.6	5335.21	72.9044	1.85e-17
69	-3.096	+	NA	NA	+	NA	NA	NA	-0.0131512	NA	4	-2663.72	5335.45	73.1462	1.64e-17
23	-3.12932	+	NA	-0.396643	+	NA	0.438609	NA	NA	NA	5	-2662.96	5335.93	73.6295	1.29e-17
22	-3.26182	+	-0.0695468	NA	+	NA	0.436971	NA	NA	NA	5	-2663	5336.01	73.709	1.24e-17
85	-3.19985	+	NA	NA	+	NA	0.43416	NA	-0.0129157	NA	5	-2663.13	5336.27	73.967	1.09e-17
8	-3.02276	+	-0.0695563	-0.393095	+	NA	NA	NA	NA	NA	5	-2663.41	5336.83	74.5324	8.19e-18
71	-2.98141	+	NA	-0.376175	+	NA	NA	NA	-0.0101247	NA	5	-2663.55	5337.11	74.8073	7.14e-18
70	-3.08458	+	-0.0690845	NA	+	NA	NA	NA	-0.0146008	NA	5	-2663.57	5337.15	74.8506	6.98e-18
24	-3.12265	+	-0.071331	-0.405536	+	NA	0.441298	NA	NA	NA	6	-2662.8	5337.62	75.314	5.54e-18
87	-3.08246	+	NA	-0.388524	+	NA	0.438286	NA	-0.00978432	NA	6	-2662.95	5337.91	75.6063	4.79e-18
86	-3.18872	+	-0.0707717	NA	+	NA	0.436704	NA	-0.0144037	NA	6	-2662.98	5337.96	75.6571	4.67e-18
72	-2.96746	+	-0.0705152	-0.383674	+	NA	NA	NA	-0.0115407	NA	6	-2663.4	5338.8	76.4995	3.06e-18
88	-3.06873	+	-0.0722659	-0.396353	+	NA	0.44097	NA	-0.0112361	NA	7	-2662.79	5339.59	77.2833	2.07e-18
194	-2.86723	+	-0.239585	NA	NA	NA	NA	NA	-0.119851	0.00325386	5	-2674.43	5358.87	96.5684	1.34e-22
130	-3.44355	+	-0.229975	NA	NA	NA	NA	NA	NA	0.0025411	4	-2676.23	5360.47	98.1633	6.05e-23
210	-2.8159	+	-0.235069	NA	NA	NA	-0.201033	NA	-0.11976	0.00325134	6	-2674.29	5360.6	98.2937	5.67e-23
193	-2.92347	+	NA	NA	NA	NA	NA	NA	-0.113795	0.00322807	4	-2676.32	5360.65	98.3457	5.52e-23
196	-2.83637	+	-0.239998	-0.110545	NA	NA	NA	NA	-0.118122	0.00322875	6	-2674.42	5360.84	98.5356	5.02e-23
129	-3.46913	+	NA	NA	NA	NA	NA	NA	NA	0.0025505	3	-2677.97	5361.94	99.6373	2.9e-23
146	-3.39153	+	-0.225443	NA	NA	NA	-0.202088	NA	NA	0.00253914	5	-2676.09	5362.19	99.8854	2.56e-23
209	-2.85798	+	NA	NA	NA	NA	-0.251455	NA	-0.113831	0.00322567	5	-2676.11	5362.22	99.9135	2.52e-23
132	-3.35363	+	-0.231158	-0.254795	NA	NA	NA	NA	NA	0.00250723	5	-2676.14	5362.29	99.9832	2.44e-23
212	-2.7873	+	-0.235498	-0.103832	NA	NA	-0.199589	NA	-0.118134	0.00322776	7	-2674.28	5362.57	100.265	2.12e-23
195	-2.89906	+	NA	-0.0877292	NA	NA	NA	NA	-0.112417	0.00320818	5	-2676.31	5362.63	100.325	2.05e-23
145	-3.40412	+	NA	NA	NA	NA	-0.250351	NA	NA	0.00254789	4	-2677.75	5363.51	101.208	1.32e-23
131	-3.38946	+	NA	-0.226232	NA	NA	NA	NA	NA	0.00252029	4	-2677.9	5363.79	101.493	1.15e-23
148	-3.30484	+	-0.226669	-0.248149	NA	NA	-0.198742	NA	NA	0.0025062	6	-2676	5364.02	101.715	1.02e-23
211	-2.83606	+	NA	-0.0798251	NA	NA	-0.250392	NA	-0.112574	0.00320755	6	-2676.1	5364.2	101.897	9.36e-24
147	-3.32781	+	NA	-0.218781	NA	NA	-0.247609	NA	NA	0.00251894	5	-2677.69	5365.38	103.074	5.19e-24
2	-3.33181	+	-0.237209	NA	NA	NA	NA	NA	NA	NA	3	-2681.09	5368.19	105.884	1.27e-24
4	-3.18786	+	-0.238792	-0.415977	NA	NA	NA	NA	NA	NA	4	-2680.88	5369.77	107.468	5.77e-25
1	-3.35827	+	NA	NA	NA	NA	NA	NA	NA	NA	2	-2682.94	5369.88	107.583	5.45e-25
18	-3.27921	+	-0.232559	NA	NA	NA	-0.204695	NA	NA	NA	4	-2680.95	5369.9	107.599	5.41e-25
66	-3.23996	+	-0.238709	NA	NA	NA	NA	NA	-0.0180857	NA	4	-2681.05	5370.1	107.801	4.89e-25
17	-3.29211	+	NA	NA	NA	NA	-0.255118	NA	NA	NA	3	-2682.72	5371.44	109.137	2.51e-25
20	-3.13883	+	-0.23423	-0.409244	NA	NA	-0.199944	NA	NA	NA	5	-2680.75	5371.5	109.196	2.43e-25
3	-3.2245	+	NA	-0.387249	NA	NA	NA	NA	NA	NA	3	-2682.76	5371.52	109.217	2.41e-25
68	-3.11658	+	-0.239985	-0.403883	NA	NA	NA	NA	-0.0148502	NA	5	-2680.85	5371.71	109.412	2.18e-25
82	-3.18743	+	-0.234051	NA	NA	NA	-0.204684	NA	-0.018072	NA	5	-2680.91	5371.82	109.516	2.07e-25
65	-3.2932	+	NA	NA	NA	NA	NA	NA	-0.0128459	NA	3	-2682.92	5371.84	109.54	2.05e-25
19	-3.1621	+	NA	-0.379525	NA	NA	-0.251022	NA	NA	NA	4	-2682.54	5373.09	110.787	1.1e-25
81	-3.22635	+	NA	NA	NA	NA	-0.255369	NA	-0.0129698	NA	4	-2682.7	5373.4	111.094	9.42e-26
84	-3.06731	+	-0.235421	-0.397116	NA	NA	-0.200087	NA	-0.0148933	NA	6	-2680.72	5373.44	111.14	9.2e-26
67	-3.17767	+	NA	-0.379139	NA	NA	NA	NA	-0.00979487	NA	4	-2682.75	5373.5	111.193	8.96e-26
83	-3.11429	+	NA	-0.371257	NA	NA	-0.251314	NA	-0.0099818	NA	5	-2682.53	5375.06	112.762	4.09e-26

## Sheet: Hyena
	cond((Int))	disp((Int))	cond(All_Livestock_1)	cond(Antelopes)	cond(Dist_Road_K)	cond(Fencing_2)	cond(Height_meters)	cond(ndvi)	cond(Underpass_type)	cond(Water_source)	cond(Width_meters)	cond(Zebras_all_1)	df	logLik	AICc	delta	weight		Family: binomial ( logit )
315	-10.7774	+	NA	0.805197	NA	1.012	0.879725	2.3163	NA	NA	-0.00152808	NA	7	-856.164	1726.34	0	0.0601393		Formula:
187	-9.98877	+	NA	0.798936	NA	+	0.803583	2.3251	NA	-0.106692	NA	NA	7	-856.301	1726.61	0.27416	0.0524355		Hyena ~ ndvi + Dist_Road_K + Fencing_2 + Water_source + Underpass_type +
59	-10.445	+	NA	0.79581	NA	+	0.781596	2.32571	NA	NA	NA	NA	6	-857.453	1726.91	0.575195	0.0451083		Zebras_all_1 + Antelopes + All_Livestock_1 + Width_meters +
319	-10.4592	+	NA	0.807384	-0.853585	+	0.86971	2.33742	NA	NA	-0.0015867	NA	8	-855.658	1727.33	0.991177	0.0366376		Height_meters + (1 | Unique_ID)
316	-10.8626	+	0.297579	0.813602	NA	+	0.886597	2.32503	NA	NA	-0.00152147	NA	8	-855.735	1727.48	1.14403	0.0339418		Data: nomitdata
443	-10.3916	+	NA	0.804351	NA	+	0.863675	2.31838	NA	-0.0663456	-0.00107284	NA	8	-855.815	1727.64	1.30471	0.0313216
191	-9.65647	+	NA	0.800875	-0.840784	+	0.791103	2.34534	NA	-0.109232	NA	NA	8	-855.847	1727.71	1.36862	0.0303366		AIC BIC logLik deviance df.resid
827	-10.7704	+	NA	0.79698	NA	+	0.875285	2.32033	NA	NA	-0.00158659	0.246574	8	-855.899	1727.81	1.47232	0.0288037		1733.4 1822.0 -854.7 1709.4 11898
699	-9.92306	+	NA	0.789219	NA	+	0.795593	2.32934	NA	-0.115875	NA	0.285413	8	-855.952	1727.92	1.57774	0.0273248
60	-10.5324	+	0.311597	0.804764	NA	+	0.78878	2.33417	NA	NA	NA	NA	7	-856.985	1727.98	1.64228	0.026457		Random effects:
188	-10.093	+	0.248759	0.805792	NA	+	0.809077	2.33183	NA	-0.100405	NA	NA	8	-856.005	1728.02	1.6842	0.0259083
63	-10.1464	+	NA	0.797158	-0.768675	+	0.76914	2.34405	NA	NA	NA	NA	7	-857.056	1728.12	1.78353	0.024653		Conditional model:
379	-10.4039	+	NA	0.805528	NA	+	0.839576	2.3248	+	NA	-0.00154507	NA	8	-856.113	1728.24	1.89974	0.0232614		Groups Name Variance Std.Dev.
251	-9.59647	+	NA	0.799198	NA	+	0.761676	2.33373	+	-0.108082	NA	NA	8	-856.248	1728.51	2.17058	0.0203153		Unique_ID (Intercept) 2.301 1.517
571	-10.433	+	NA	0.788276	NA	+	0.775407	2.32818	NA	NA	NA	0.20486	7	-857.269	1728.55	2.20939	0.0199249		Number of obs: 11910, groups: Unique_ID, 72
320	-10.5549	+	0.277991	0.815026	-0.81845	+	0.876966	2.34409	NA	NA	-0.00157851	NA	9	-855.282	1728.58	2.24212	0.0196014
447	-10.0648	+	NA	0.806772	-0.877019	+	0.853616	2.33978	NA	-0.0668329	-0.00112979	NA	9	-855.302	1728.62	2.28081	0.0192259		Conditional model:
123	-10.1823	+	NA	0.795938	NA	+	0.752932	2.3313	+	NA	NA	NA	7	-857.429	1728.87	2.53069	0.0169678			Estimate	Std. Error	z value	Pr(>|z|)
828	-10.8577	+	0.309508	0.80567	NA	+	0.882057	2.32963	NA	NA	-0.00158339	0.262244	9	-855.437	1728.89	2.55143	0.0167927		(Intercept)	-10.1802	1.54175	-6.603	4.03e-11	***
831	-10.4699	+	NA	0.799734	-0.813582	+	0.866451	2.33996	NA	NA	-0.00163667	0.222339	9	-855.443	1728.9	2.56379	0.0166893		ndvi	2.34854	0.539385	4.354	1.34e-05	***
955	-10.3266	+	NA	0.794867	NA	+	0.855739	2.32339	NA	-0.0753084	-0.00108004	0.287992	9	-855.46	1728.93	2.59668	0.0164171		Dist_Road_K	-0.796009	0.935219	-0.851	0.39469
444	-10.5215	+	0.264085	0.811873	NA	+	0.872436	2.32565	NA	-0.057678	-0.00112701	NA	9	-855.482	1728.98	2.64139	0.0160541		Fencing_2Y	0.991622	0.15801	6.276	3.48e-10	***
703	-9.61742	+	NA	0.791671	-0.793319	+	0.784818	2.34801	NA	-0.11756	NA	0.262691	9	-855.551	1729.12	2.78013	0.0149782		Water_source	-0.066923	0.082309	-0.813	0.41618
192	-9.76756	+	0.228833	0.806972	-0.807241	+	0.796905	2.35021	NA	-0.103325	NA	NA	9	-855.596	1729.21	2.86888	0.0143281		Underpass_typeCulvert	0.010647	0.783416	0.014	0.98916
64	-10.2463	+	0.295264	0.805486	-0.731586	+	0.776911	2.35061	NA	NA	NA	NA	8	-856.635	1729.28	2.94411	0.0137991		Zebras_all_1	0.273062	0.340758	0.801	0.42294
700	-10.0293	+	0.256625	0.796419	NA	+	0.801122	2.33639	NA	-0.109652	NA	0.293289	9	-855.637	1729.29	2.95241	0.013742		Antelopes	0.804787	0.286778	2.806	0.00501	**
383	-10.3782	+	NA	0.807425	-0.836713	+	0.860527	2.33905	+	NA	-0.0015895	NA	9	-855.656	1729.33	2.98889	0.0134937		All_Livestock_1	0.252745	0.322334	0.784	0.43298
380	-10.5922	+	0.289874	0.813612	NA	+	0.857627	2.33067	+	NA	-0.00153382	NA	9	-855.709	1729.43	3.09539	0.0127939		Width_meters	-0.001183	0.001099	-1.076	0.28174
507	-9.96666	+	NA	0.804728	NA	+	0.818426	2.32796	+	-0.0675089	-0.00108369	NA	9	-855.75	1729.52	3.17763	0.0122785		Height_meters	0.85798	0.201639	4.255	2.09e-05	***
572	-10.5217	+	0.32211	0.797338	NA	+	0.782241	2.33711	NA	NA	NA	0.221408	8	-856.772	1729.56	3.21807	0.0120327		---
255	-9.55502	+	NA	0.800884	-0.819229	+	0.779662	2.34731	+	-0.109541	NA	NA	9	-855.843	1729.7	3.36375	0.0111874		Signif. codes: 0 ‘***’ 0.001 ‘**’ 0.01 ‘*’ 0.05 ‘.’ 0.1 ‘ ’ 1
891	-10.4653	+	NA	0.797462	NA	+	0.84263	2.3271	+	NA	-0.00159869	0.239097	9	-855.865	1729.74	3.40718	0.0109471
575	-10.1499	+	NA	0.790247	-0.736114	+	0.764351	2.3453	NA	NA	NA	0.18337	8	-856.909	1729.83	3.49214	0.0104918
763	-9.60885	+	NA	0.789617	NA	+	0.762088	2.33616	+	-0.116775	NA	0.278353	9	-855.917	1729.85	3.51206	0.0103878
252	-9.79149	+	0.239967	0.80574	NA	+	0.777118	2.33794	+	-0.101717	NA	NA	9	-855.975	1729.97	3.62786	0.00980342		Family: binomial ( logit )
124	-10.3801	+	0.30762	0.804722	NA	+	0.772203	2.33717	+	NA	NA	NA	8	-856.978	1729.97	3.62981	0.0097939		Formula: Hyena ~ ndvi + Fencing_2 + Antelopes + Width_meters + Height_meters + (1 | Unique_ID)
959	-10.026	+	NA	0.797797	-0.829559	+	0.847284	2.34313	NA	-0.0750064	-0.00113326	0.263357	10	-855.005	1730.03	3.6903	0.00950209		Data: nomitdata
448	-10.1997	+	0.243401	0.813467	-0.843009	+	0.862426	2.34515	NA	-0.0587962	-0.00117812	NA	10	-855.018	1730.05	3.71621	0.0093798
832	-10.5697	+	0.29013	0.807553	-0.773911	+	0.873677	2.34714	NA	NA	-0.00163205	0.238739	10	-855.036	1730.09	3.75293	0.00920917		AIC BIC logLik deviance df.resid
127	-10.1522	+	NA	0.797157	-0.769853	+	0.769814	2.34393	+	NA	NA	NA	8	-857.056	1730.12	3.78619	0.00905727		1726.3 1778.0 -856.2 1712.3 11903
956	-10.4594	+	0.272147	0.802748	NA	+	0.864635	2.33107	NA	-0.0666102	-0.00113667	0.296446	10	-855.107	1730.23	3.89507	0.00857737
635	-10.2308	+	NA	0.788524	NA	+	0.753473	2.33239	+	NA	NA	0.200077	8	-857.255	1730.52	4.18458	0.00742144		Random effects:
704	-9.73151	+	0.237622	0.79806	-0.75714	+	0.79066	2.35314	NA	-0.111712	NA	0.271455	10	-855.281	1730.58	4.24372	0.00720519
384	-10.5606	+	0.278132	0.815038	-0.81955	+	0.877612	2.344	+	NA	-0.00157826	NA	10	-855.282	1730.58	4.24546	0.00719894		Conditional model:
511	-9.94151	+	NA	0.806799	-0.850883	+	0.839736	2.34222	+	-0.0671663	-0.00113155	NA	10	-855.296	1730.61	4.27208	0.00710374		Groups Name Variance Std.Dev.
1019	-9.97979	+	NA	0.79535	NA	+	0.818876	2.33106	+	-0.0760031	-0.00108896	0.279938	10	-855.416	1730.85	4.51269	0.00629853		Unique_ID (Intercept) 2.294 1.514
892	-10.666	+	0.303886	0.805791	NA	+	0.861603	2.33357	+	NA	-0.00159129	0.257407	10	-855.424	1730.87	4.52897	0.00624747		Number of obs: 11910, groups: Unique_ID, 72
895	-10.4374	+	NA	0.799763	-0.806955	+	0.862778	2.3406	+	NA	-0.0016375	0.221672	10	-855.443	1730.9	4.5663	0.00613196
508	-10.1902	+	0.254118	0.811855	NA	+	0.837406	2.33251	+	-0.0589343	-0.0011332	NA	10	-855.445	1730.91	4.57033	0.0061196		Conditional model:
576	-10.2529	+	0.305801	0.798586	-0.694496	+	0.771828	2.35224	NA	NA	NA	0.200767	9	-856.46	1730.93	4.59729	0.00603766			Estimate	Std. Error	z value	Pr(>|z|)
767	-9.56956	+	NA	0.791698	-0.783329	+	0.779433	2.34892	+	-0.11768	NA	0.261811	10	-855.55	1731.12	4.78173	0.00550578		(Intercept)	-10.78	0.8783	-12.271	< 2e-16	***
256	-9.74208	+	0.22816	0.806966	-0.802033	+	0.794057	2.35066	+	-0.103424	NA	NA	10	-855.595	1731.21	4.87177	0.0052634		ndvi	2.316	0.5376	4.309	1.64e-05	***
764	-9.81204	+	0.250193	0.79649	NA	+	0.778139	2.3407	+	-0.110453	NA	0.288394	10	-855.622	1731.26	4.92477	0.00512577		Fencing_2Y	1.012	0.1569	6.449	1.13e-10	***
128	-10.3453	+	0.297622	0.805559	-0.750802	+	0.788192	2.34896	+	NA	NA	NA	9	-856.631	1731.28	4.94014	0.00508652		Antelopes	0.8052	0.287	2.805	0.00502	**
960	-10.1645	+	0.252304	0.804798	-0.792823	+	0.856217	2.3488	NA	-0.0669574	-0.0011838	0.272724	11	-854.701	1731.42	5.08632	0.004728		Width_meters	-0.0015	0.001	-1.607	0.10798
636	-10.4396	+	0.319895	0.797368	NA	+	0.773367	2.33868	+	NA	NA	0.219418	9	-856.77	1731.55	5.21674	0.00442953		Height_meters	0.8797	0.1543	5.7	1.2e-08	***
639	-10.1988	+	NA	0.790211	-0.745606	+	0.7699	2.34442	+	NA	NA	0.184333	9	-856.908	1731.83	5.49342	0.00385725		---
313	-10.8814	+	NA	NA	NA	+	0.895856	2.14078	NA	NA	-0.00151864	NA	6	-859.915	1731.84	5.50015	0.00384428		Signif. codes: 0 ‘***’ 0.001 ‘**’ 0.01 ‘*’ 0.05 ‘.’ 0.1 ‘ ’ 1
185	-10.0856	+	NA	NA	NA	+	0.819844	2.15109	NA	-0.107721	NA	NA	6	-860.005	1732.02	5.67927	0.00351496
1023	-9.95611	+	NA	0.797847	-0.814961	+	0.839436	2.34449	+	-0.0751535	-0.00113426	0.262017	11	-855.003	1732.03	5.69011	0.00349597
512	-10.1565	+	0.242217	0.813441	-0.834275	+	0.857599	2.34595	+	-0.0589458	-0.00117843	NA	11	-855.017	1732.06	5.7185	0.00344668
896	-10.6319	+	0.291789	0.807545	-0.786148	+	0.88067	2.34603	+	NA	-0.00163	0.240061	11	-855.035	1732.09	5.75365	0.00338663
1020	-10.2128	+	0.264602	0.802853	NA	+	0.838623	2.33603	+	-0.0673913	-0.00114108	0.290701	11	-855.086	1732.19	5.85726	0.00321567
57	-10.545	+	NA	NA	NA	+	0.797453	2.15214	NA	NA	NA	NA	5	-861.135	1732.28	5.93837	0.00308785
768	-9.76506	+	0.238524	0.798071	-0.763851	+	0.7944	2.35255	+	-0.111603	NA	0.272084	11	-855.281	1732.58	6.24661	0.00264682
317	-10.5644	+	NA	NA	-0.850832	+	0.885891	2.16032	NA	NA	-0.00157677	NA	7	-859.431	1732.87	6.53388	0.00229268
640	-10.4029	+	0.309475	0.798587	-0.722813	+	0.788809	2.34975	+	NA	NA	0.203824	10	-856.452	1732.92	6.58481	0.00223504
314	-10.9605	+	0.272561	NA	NA	+	0.902239	2.14676	NA	NA	-0.00151211	NA	7	-859.555	1733.12	6.78268	0.0020245
441	-10.4824	+	NA	NA	NA	+	0.87915	2.14324	NA	-0.0684475	-0.00104913	NA	7	-859.559	1733.13	6.78895	0.00201817
189	-9.75571	+	NA	NA	-0.835782	+	0.807388	2.16991	NA	-0.110093	NA	NA	7	-859.57	1733.15	6.81236	0.00199468
697	-10.0116	+	NA	NA	NA	+	0.810785	2.15746	NA	-0.117766	NA	0.314094	7	-859.581	1733.17	6.8345	0.00197272
825	-10.8717	+	NA	NA	NA	+	0.890584	2.1466	NA	NA	-0.00158157	0.274339	7	-859.587	1733.18	6.84654	0.00196088
1024	-10.1802	+	0.252745	0.804787	-0.796009	+	0.85798	2.34854	+	-0.0669232	-0.00118349	0.273062	12	-854.701	1733.43	7.09017	0.00173599
58	-10.6266	+	0.286114	NA	NA	+	0.804199	2.15782	NA	NA	NA	NA	6	-860.741	1733.49	7.15203	0.00168312
61	-10.2469	+	NA	NA	-0.767419	+	0.785037	2.16936	NA	NA	NA	NA	6	-860.753	1733.51	7.17466	0.00166419
186	-10.1807	+	0.223989	NA	NA	+	0.824889	2.15555	NA	-0.101996	NA	NA	7	-859.765	1733.54	7.20128	0.00164218
377	-10.5158	+	NA	NA	NA	+	0.856577	2.14849	+	NA	-0.00153529	NA	7	-859.868	1733.75	7.40806	0.00148087
569	-10.5296	+	NA	NA	NA	+	0.790123	2.15638	NA	NA	NA	0.235328	6	-860.893	1733.79	7.45458	0.00144683
249	-9.69976	+	NA	NA	NA	+	0.778651	2.15902	+	-0.109089	NA	NA	7	-859.955	1733.92	7.58277	0.001357
445	-10.1585	+	NA	NA	-0.872256	+	0.869208	2.16301	NA	-0.0687537	-0.00110656	NA	8	-859.069	1734.15	7.81164	0.00121027
121	-10.2895	+	NA	NA	NA	+	0.769584	2.15724	+	NA	NA	NA	6	-861.114	1734.24	7.8977	0.0011593
318	-10.6526	+	0.253801	NA	-0.818934	+	0.892594	2.16463	NA	NA	-0.00156897	NA	8	-859.118	1734.25	7.91021	0.00115207
953	-10.4086	+	NA	NA	NA	+	0.870074	2.1503	NA	-0.0783045	-0.00105436	0.315921	8	-859.131	1734.27	7.93615	0.00113722
829	-10.5746	+	NA	NA	-0.805945	+	0.8819	2.16456	NA	NA	-0.00163134	0.251361	8	-859.156	1734.32	7.98692	0.00110871
826	-10.9529	+	0.284078	NA	NA	+	0.896925	2.15302	NA	NA	-0.0015781	0.287183	8	-859.198	1734.41	8.07114	0.001063
701	-9.71045	+	NA	NA	-0.782999	+	0.800131	2.17457	NA	-0.119321	NA	0.292477	8	-859.203	1734.42	8.08147	0.00105752
442	-10.6013	+	0.238446	NA	NA	+	0.887218	2.14805	NA	-0.0605604	-0.0010981	NA	8	-859.287	1734.59	8.24856	0.000972759
698	-10.1087	+	0.23103	NA	NA	+	0.815901	2.16207	NA	-0.112068	NA	0.320077	8	-859.327	1734.67	8.32801	0.000934875
190	-9.85613	+	0.204946	NA	-0.80609	+	0.812662	2.17287	NA	-0.104755	NA	NA	8	-859.369	1734.75	8.41194	0.000896455
62	-10.3395	+	0.270377	NA	-0.733657	+	0.79228	2.17347	NA	NA	NA	NA	7	-860.4	1734.81	8.47109	0.000870331
381	-10.4896	+	NA	NA	-0.835554	+	0.877413	2.16172	+	NA	-0.00157927	NA	8	-859.429	1734.87	8.53224	0.000844125
570	-10.6125	+	0.296594	NA	NA	+	0.796598	2.16242	NA	NA	NA	0.248996	7	-860.471	1734.95	8.61407	0.000810282
505	-10.0645	+	NA	NA	NA	+	0.83469	2.15203	+	-0.0695817	-0.00105988	NA	8	-859.498	1735.01	8.67098	0.000787551
378	-10.6904	+	0.26512	NA	NA	+	0.873315	2.15207	+	NA	-0.0015246	NA	8	-859.531	1735.07	8.7359	0.000762399
573	-10.2495	+	NA	NA	-0.729437	+	0.77921	2.1722	NA	NA	NA	0.21491	7	-860.551	1735.11	8.77299	0.000748388
761	-9.71117	+	NA	NA	NA	+	0.778776	2.16353	+	-0.118642	NA	0.307643	8	-859.551	1735.11	8.77675	0.000746984
889	-10.5823	+	NA	NA	NA	+	0.859637	2.15253	+	NA	-0.0015933	0.267578	8	-859.558	1735.13	8.79041	0.000741898
253	-9.65845	+	NA	NA	-0.815391	+	0.796437	2.17166	+	-0.110396	NA	NA	8	-859.567	1735.15	8.80809	0.000735371
957	-10.1129	+	NA	NA	-0.819506	+	0.861804	2.16835	NA	-0.0778755	-0.00110796	0.292489	9	-858.702	1735.42	9.08229	0.000641156
122	-10.4736	+	0.282231	NA	NA	+	0.787552	2.16067	+	NA	NA	NA	7	-860.734	1735.48	9.13963	0.000623037
250	-9.87715	+	0.215385	NA	NA	+	0.792719	2.16136	+	-0.10331	NA	NA	8	-859.736	1735.48	9.14594	0.000621073
125	-10.2589	+	NA	NA	-0.76978	+	0.786404	2.16915	+	NA	NA	NA	7	-860.753	1735.51	9.17691	0.000611531
830	-10.6665	+	0.265775	NA	-0.770098	+	0.888594	2.16925	NA	NA	-0.00162617	0.264862	9	-858.815	1735.64	9.30701	0.000573017
446	-10.2809	+	0.218774	NA	-0.842208	+	0.877239	2.16627	NA	-0.0614842	-0.0011501	NA	9	-858.839	1735.69	9.3561	0.000559122
954	-10.5302	+	0.245594	NA	NA	+	0.878278	2.15531	NA	-0.070373	-0.0011053	0.322306	9	-858.844	1735.7	9.36507	0.00055662
633	-10.3433	+	NA	NA	NA	+	0.769932	2.15998	+	NA	NA	0.231119	7	-860.881	1735.77	9.43447	0.000537638
702	-9.81383	+	0.213093	NA	-0.751136	+	0.805473	2.17768	NA	-0.11399	NA	0.299224	9	-858.986	1735.99	9.65046	0.0004826
509	-10.0399	+	NA	NA	-0.847396	+	0.855877	2.16523	+	-0.0690758	-0.00110827	NA	9	-859.063	1736.14	9.80395	0.000446949
1017	-10.0762	+	NA	NA	NA	+	0.834775	2.15721	+	-0.0789808	-0.00106328	0.308543	9	-859.092	1736.2	9.86205	0.000434151
382	-10.6583	+	0.253941	NA	-0.820102	+	0.893231	2.16452	+	NA	-0.00156872	NA	9	-859.118	1736.25	9.91322	0.000423185
893	-10.5543	+	NA	NA	-0.8019	+	0.879609	2.16492	+	NA	-0.00163197	0.250965	9	-859.156	1736.33	9.98963	0.000407321
574	-10.345	+	0.281118	NA	-0.691703	+	0.78623	2.17665	NA	NA	NA	0.229332	8	-860.171	1736.35	10.0169	0.000401814
890	-10.7681	+	0.278864	NA	NA	+	0.877218	2.15654	+	NA	-0.00158552	0.282755	9	-859.187	1736.39	10.0511	0.000394986
765	-9.67242	+	NA	NA	-0.775157	+	0.795859	2.17524	+	-0.11942	NA	0.291803	9	-859.203	1736.42	10.0834	0.000388659
506	-10.2684	+	0.228741	NA	NA	+	0.85204	2.15454	+	-0.0618111	-0.00110467	NA	9	-859.251	1736.52	10.1793	0.000370462
762	-9.89607	+	0.224921	NA	NA	+	0.793411	2.16606	+	-0.112855	NA	0.3155	9	-859.312	1736.64	10.3023	0.000348363
254	-9.82797	+	0.204216	NA	-0.80043	+	0.809519	2.17335	+	-0.104865	NA	NA	9	-859.368	1736.75	10.4144	0.00032938
126	-10.4382	+	0.272663	NA	-0.752647	+	0.803508	2.17189	+	NA	NA	NA	8	-860.396	1736.8	10.4671	0.000320819
958	-10.2387	+	0.226959	NA	-0.78728	+	0.869974	2.17178	NA	-0.0705559	-0.0011533	0.29971	10	-858.457	1736.93	10.594	0.000301091
634	-10.5376	+	0.294638	NA	NA	+	0.788506	2.16375	+	NA	NA	0.24726	8	-860.469	1736.95	10.6133	0.000298206
637	-10.3113	+	NA	NA	-0.74135	+	0.786237	2.17115	+	NA	NA	0.216074	8	-860.549	1737.11	10.773	0.000275318
1021	-10.0529	+	NA	NA	-0.807039	+	0.855081	2.16941	+	-0.0780166	-0.00110863	0.29141	10	-858.701	1737.42	11.0829	0.000235793
894	-10.7342	+	0.267521	NA	-0.783183	+	0.896188	2.16814	+	NA	-0.00162394	0.266227	10	-858.813	1737.64	11.307	0.000210801
1018	-10.2884	+	0.238453	NA	NA	+	0.852774	2.15991	+	-0.0711136	-0.00111004	0.316938	10	-858.825	1737.67	11.33	0.000208393
510	-10.2349	+	0.217528	NA	-0.832906	+	0.872114	2.16705	+	-0.0616569	-0.00115058	NA	10	-858.839	1737.7	11.358	0.000205498
766	-9.84982	+	0.214034	NA	-0.758287	+	0.809483	2.1771	+	-0.113872	NA	0.299862	10	-858.986	1737.99	11.6529	0.000177321
638	-10.501	+	0.284822	NA	-0.720887	+	0.803886	2.1742	+	NA	NA	0.232359	9	-860.163	1738.34	12.0034	0.00014882
1022	-10.257	+	0.227443	NA	-0.790769	+	0.871999	2.1715	+	-0.0704966	-0.00115301	0.300026	11	-858.456	1738.94	12.5975	0.000110574
283	-10.3145	+	NA	0.666121	NA	+	0.899751	NA	NA	NA	-0.00160118	NA	6	-864.751	1741.51	15.1721	3.05e-05
155	-9.49735	+	NA	0.660248	NA	+	0.819798	NA	NA	-0.109567	NA	NA	6	-864.939	1741.88	15.5472	2.53e-05
27	-9.96732	+	NA	0.657093	NA	+	0.797348	NA	NA	NA	NA	NA	5	-866.101	1742.21	15.8688	2.15e-05
284	-10.3974	+	0.276722	0.673165	NA	+	0.906964	NA	NA	NA	-0.0015958	NA	7	-864.378	1742.76	16.427	1.63e-05
287	-10.0412	+	NA	0.666606	-0.744878	+	0.892232	NA	NA	NA	-0.00165387	NA	7	-864.383	1742.78	16.4379	1.62e-05
411	-9.92522	+	NA	0.665492	NA	+	0.883582	NA	NA	-0.0668158	-0.00114285	NA	7	-864.411	1742.83	16.4933	1.58e-05
795	-10.3087	+	NA	0.658329	NA	+	0.895678	NA	NA	NA	-0.00165478	0.23757	7	-864.505	1743.02	16.6822	1.43e-05
667	-9.43519	+	NA	0.651047	NA	+	0.81246	NA	NA	-0.118516	NA	0.277398	7	-864.608	1743.23	16.8879	1.29e-05
159	-9.21387	+	NA	0.660641	-0.725295	+	0.810045	NA	NA	-0.111805	NA	NA	7	-864.616	1743.24	16.9036	1.28e-05
156	-9.59652	+	0.229299	0.665967	NA	+	0.825512	NA	NA	-0.103795	NA	NA	7	-864.686	1743.38	17.0429	1.2e-05
28	-10.0529	+	0.291982	0.664729	NA	+	0.804849	NA	NA	NA	NA	NA	6	-865.687	1743.38	17.0441	1.2e-05
347	-10.148	+	NA	0.665976	NA	+	0.882013	NA	+	NA	-0.00160903	NA	7	-864.741	1743.49	17.1548	1.13e-05
107	-4.83205	+	NA	0.801679	NA	+	NA	2.38225	+	NA	NA	NA	6	-865.752	1743.51	17.1727	1.12e-05
31	-9.71453	+	NA	0.657136	-0.659919	+	0.787637	NA	NA	NA	NA	NA	6	-865.822	1743.65	17.3128	1.05e-05
539	-9.95706	+	NA	0.649994	NA	+	0.791618	NA	NA	NA	NA	0.199493	6	-865.926	1743.86	17.5217	9.43e-06
219	-9.31854	+	NA	0.660075	NA	+	0.800864	NA	+	-0.110234	NA	NA	7	-864.928	1743.87	17.5284	9.4e-06
415	-9.64431	+	NA	0.66613	-0.764521	+	0.876018	NA	NA	-0.0672789	-0.00119381	NA	8	-864.037	1744.09	17.7487	8.42e-06
288	-10.1335	+	0.26121	0.67317	-0.713143	+	0.89968	NA	NA	NA	-0.00164692	NA	8	-864.049	1744.11	17.773	8.31e-06
235	-4.29215	+	NA	0.80386	NA	+	NA	2.38591	+	-0.0902203	NA	NA	7	-865.078	1744.17	17.8274	8.09e-06
923	-9.86269	+	NA	0.65648	NA	+	0.876152	NA	NA	-0.075644	-0.00114558	0.278003	8	-864.079	1744.17	17.8327	8.07e-06
91	-9.91713	+	NA	0.65704	NA	+	0.791912	NA	+	NA	NA	NA	6	-866.1	1744.21	17.8691	7.92e-06
796	-10.3941	+	0.288164	0.665605	NA	+	0.902864	NA	NA	NA	-0.00165265	0.252204	8	-864.102	1744.22	17.8785	7.89e-06
412	-10.0487	+	0.243955	0.671736	NA	+	0.892428	NA	NA	-0.0588245	-0.00119374	NA	8	-864.124	1744.26	17.9235	7.71e-06
799	-10.0521	+	NA	0.659343	-0.705849	+	0.889137	NA	NA	NA	-0.00170011	0.217442	8	-864.177	1744.37	18.0294	7.31e-06
671	-9.17644	+	NA	0.651911	-0.678247	+	0.804119	NA	NA	-0.120021	NA	0.258783	8	-864.329	1744.67	18.3316	6.29e-06
668	-9.5364	+	0.237095	0.657077	NA	+	0.818232	NA	NA	-0.112794	NA	0.284861	8	-864.338	1744.69	18.3508	6.23e-06
281	-10.4342	+	NA	NA	NA	+	0.912193	NA	NA	NA	-0.00159172	NA	5	-867.357	1744.72	18.3805	6.14e-06
348	-10.328	+	0.274916	0.673055	NA	+	0.899585	NA	+	NA	-0.00159918	NA	8	-864.376	1744.76	18.4264	6e-06
351	-10.1278	+	NA	0.666707	-0.762613	+	0.901984	NA	+	NA	-0.00165072	NA	8	-864.38	1744.77	18.4348	5.97e-06
475	-9.71019	+	NA	0.665314	NA	+	0.860912	NA	+	-0.0674492	-0.00114866	NA	8	-864.395	1744.8	18.4639	5.89e-06
160	-9.3195	+	0.213801	0.665898	-0.69543	+	0.815945	NA	NA	-0.106304	NA	NA	8	-864.395	1744.8	18.4652	5.88e-06
32	-9.81131	+	0.279334	0.664398	-0.626145	+	0.795567	NA	NA	NA	NA	NA	7	-865.443	1744.89	18.5572	5.62e-06
108	-4.8791	+	0.236943	0.808168	NA	+	NA	2.38443	+	NA	NA	NA	7	-865.483	1744.98	18.6379	5.39e-06
540	-10.044	+	0.302143	0.657726	NA	+	0.798839	NA	NA	NA	NA	0.215096	7	-865.486	1744.98	18.6434	5.38e-06
619	-4.88646	+	NA	0.792967	NA	+	NA	2.38351	+	NA	NA	0.244854	7	-865.498	1745	18.6672	5.32e-06
153	-9.61178	+	NA	NA	NA	+	0.832426	NA	NA	-0.110254	NA	NA	5	-867.505	1745.01	18.6766	5.29e-06
859	-10.2092	+	NA	0.658305	NA	+	0.885114	NA	+	NA	-0.001659	0.23524	8	-864.502	1745.02	18.6779	5.29e-06
731	-9.332	+	NA	0.651007	NA	+	0.801549	NA	+	-0.118832	NA	0.275182	8	-864.604	1745.22	18.8835	4.77e-06
223	-9.28317	+	NA	0.660722	-0.739832	+	0.817796	NA	+	-0.111579	NA	NA	8	-864.614	1745.24	18.9028	4.73e-06
25	-10.0834	+	NA	NA	NA	+	0.809656	NA	NA	NA	NA	NA	4	-868.648	1745.3	18.9608	4.59e-06
111	-4.75391	+	NA	0.802043	-0.403184	+	NA	2.38794	+	NA	NA	NA	7	-865.663	1745.34	18.9978	4.51e-06
543	-9.71884	+	NA	0.65058	-0.627809	+	0.783056	NA	NA	NA	NA	0.182236	7	-865.677	1745.36	19.0249	4.45e-06
220	-9.50398	+	0.226829	0.665821	NA	+	0.815776	NA	+	-0.104207	NA	NA	8	-864.683	1745.38	19.0402	4.41e-06
92	-10.1068	+	0.293273	0.66482	NA	+	0.810686	NA	+	NA	NA	NA	7	-865.686	1745.38	19.0446	4.4e-06
747	-4.30787	+	NA	0.793865	NA	+	NA	2.3885	+	-0.0985396	NA	0.296686	8	-864.711	1745.43	19.0964	4.29e-06
363	-4.81059	+	NA	0.802079	NA	+	NA	2.38238	+	NA	-8.5e-05	NA	7	-865.748	1745.51	19.1687	4.14e-06
927	-9.60595	+	NA	0.657638	-0.717665	+	0.869899	NA	NA	-0.0754308	-0.00119304	0.257419	9	-863.753	1745.52	19.1843	4.11e-06
924	-9.98881	+	0.251797	0.663053	NA	+	0.885127	NA	NA	-0.0676392	-0.00119833	0.285934	9	-863.775	1745.57	19.228	4.02e-06
416	-9.77258	+	0.227622	0.671865	-0.734355	+	0.884807	NA	NA	-0.0597676	-0.00123979	NA	9	-863.787	1745.59	19.2522	3.97e-06
95	-9.89256	+	NA	0.657354	-0.694991	+	0.807859	NA	+	NA	NA	NA	7	-865.81	1745.63	19.2926	3.89e-06
800	-10.1484	+	0.272903	0.66607	-0.669874	+	0.896591	NA	NA	NA	-0.00169619	0.232795	9	-863.815	1745.65	19.3079	3.86e-06
236	-4.35971	+	0.1914	0.808886	NA	+	NA	2.38711	+	-0.0852522	NA	NA	8	-864.904	1745.82	19.4828	3.54e-06
603	-9.96643	+	NA	0.649997	NA	+	0.792628	NA	+	NA	NA	0.199701	7	-865.926	1745.86	19.524	3.46e-06
491	-4.31883	+	NA	0.801463	NA	+	NA	2.38606	+	-0.111798	0.000617556	NA	8	-864.942	1745.9	19.5588	3.4e-06
285	-10.1584	+	NA	NA	-0.750352	+	0.904521	NA	NA	NA	-0.00164455	NA	6	-866.993	1745.99	19.6557	3.24e-06
239	-4.21615	+	NA	0.804267	-0.394788	+	NA	2.39158	+	-0.0901	NA	NA	8	-864.993	1746	19.6608	3.24e-06
409	-10.035	+	NA	NA	NA	+	0.895569	NA	NA	-0.0683985	-0.00112273	NA	6	-867.011	1746.03	19.6907	3.19e-06
282	-10.5123	+	0.257602	NA	NA	+	0.91893	NA	NA	NA	-0.00158637	NA	6	-867.033	1746.07	19.7354	3.12e-06
479	-9.69009	+	NA	0.666208	-0.774123	+	0.881138	NA	+	-0.0671608	-0.0011931	NA	9	-864.036	1746.09	19.7501	3.09e-06
352	-10.3026	+	0.265217	0.673462	-0.746885	+	0.918644	NA	+	NA	-0.00164067	NA	9	-864.039	1746.09	19.7548	3.09e-06
793	-10.4258	+	NA	NA	NA	+	0.907418	NA	NA	NA	-0.00164921	0.261507	6	-867.058	1746.12	19.7862	3.04e-06
987	-9.72323	+	NA	0.656439	NA	+	0.861488	NA	+	-0.0759633	-0.00114942	0.27488	9	-864.072	1746.16	19.8222	2.98e-06
672	-9.28514	+	0.222461	0.657456	-0.645822	+	0.810088	NA	NA	-0.114561	NA	0.267059	9	-864.091	1746.2	19.859	2.93e-06
860	-10.4011	+	0.288354	0.665613	NA	+	0.903604	NA	+	NA	-0.00165236	0.252368	9	-864.102	1746.22	19.8815	2.9e-06
665	-9.54195	+	NA	NA	NA	+	0.824172	NA	NA	-0.119943	NA	0.301764	6	-867.113	1746.23	19.895	2.88e-06
476	-9.92337	+	0.240484	0.671539	NA	+	0.87929	NA	+	-0.0593175	-0.00119646	NA	9	-864.119	1746.25	19.9162	2.85e-06
863	-10.1869	+	NA	0.659434	-0.732683	+	0.90424	NA	+	NA	-0.00169578	0.220041	9	-864.17	1746.36	20.0185	2.71e-06
157	-9.3266	+	NA	NA	-0.729159	+	0.822487	NA	NA	-0.112391	NA	NA	6	-867.186	1746.38	20.0413	2.67e-06
620	-4.93938	+	0.250451	0.799701	NA	+	NA	2.38602	+	NA	NA	0.259652	8	-865.199	1746.41	20.0735	2.63e-06
544	-9.81871	+	0.289608	0.657873	-0.589783	+	0.790754	NA	NA	NA	NA	0.198635	8	-865.271	1746.56	20.2175	2.45e-06
26	-10.1643	+	0.272348	NA	NA	+	0.816714	NA	NA	NA	NA	NA	5	-868.288	1746.58	20.2435	2.42e-06
154	-9.70372	+	0.210293	NA	NA	+	0.837694	NA	NA	-0.104911	NA	NA	6	-867.292	1746.59	20.2527	2.41e-06
735	-9.29867	+	NA	0.652026	-0.703445	+	0.817768	NA	+	-0.119686	NA	0.260946	9	-864.323	1746.66	20.3237	2.32e-06
732	-9.52555	+	0.236799	0.657065	NA	+	0.817092	NA	+	-0.112834	NA	0.284624	9	-864.338	1746.69	20.3537	2.29e-06
345	-10.2588	+	NA	NA	NA	+	0.8935	NA	+	NA	-0.00160006	NA	6	-867.346	1746.7	20.3614	2.28e-06
29	-9.8277	+	NA	NA	-0.666202	+	0.799774	NA	NA	NA	NA	NA	5	-868.37	1746.75	20.4076	2.23e-06
224	-9.46221	+	0.21725	0.666147	-0.724253	+	0.831787	NA	+	-0.105742	NA	NA	9	-864.388	1746.79	20.4541	2.18e-06
112	-4.80367	+	0.232393	0.808353	-0.384349	+	NA	2.38958	+	NA	NA	NA	8	-865.404	1746.82	20.4835	2.14e-06
96	-10.0783	+	0.285118	0.664862	-0.677443	+	0.825804	NA	+	NA	NA	NA	8	-865.418	1746.85	20.5113	2.11e-06
623	-4.81209	+	NA	0.793477	-0.377484	+	NA	2.38874	+	NA	NA	0.239321	8	-865.421	1746.85	20.5158	2.11e-06
537	-10.0698	+	NA	NA	NA	+	0.80297	NA	NA	NA	NA	0.225168	5	-868.425	1746.86	20.5176	2.11e-06
604	-10.1667	+	0.305184	0.65785	NA	+	0.812031	NA	+	NA	NA	0.217895	8	-865.481	1746.97	20.6367	1.99e-06
364	-4.86618	+	0.236237	0.80838	NA	+	NA	2.38449	+	NA	-5.06e-05	NA	8	-865.482	1746.98	20.6384	1.98e-06
928	-9.73776	+	0.236291	0.663651	-0.684925	+	0.878834	NA	NA	-0.0679181	-0.00124074	0.266224	10	-863.485	1746.99	20.6515	1.97e-06
875	-4.85273	+	NA	0.793537	NA	+	NA	2.38381	+	NA	-0.000136146	0.247798	8	-865.49	1746.99	20.6537	1.97e-06
217	-9.42283	+	NA	NA	NA	+	0.812413	NA	+	-0.110955	NA	NA	6	-867.493	1746.99	20.6557	1.97e-06
748	-4.37975	+	0.20244	0.799239	NA	+	NA	2.38989	+	-0.0935104	NA	0.305227	9	-864.518	1747.05	20.7127	1.91e-06
1003	-4.33315	+	NA	0.791473	NA	+	NA	2.38832	+	-0.119695	0.000605059	0.294053	9	-864.581	1747.18	20.84	1.79e-06
921	-9.96456	+	NA	NA	NA	+	0.887161	NA	NA	-0.077981	-0.00112409	0.302047	7	-866.619	1747.25	20.9101	1.73e-06
413	-9.75285	+	NA	NA	-0.768616	+	0.887887	NA	NA	-0.0687279	-0.00117459	NA	7	-866.643	1747.3	20.9582	1.69e-06
751	-4.23826	+	NA	0.794397	-0.360226	+	NA	2.39356	+	-0.0982606	NA	0.290885	9	-864.641	1747.3	20.9593	1.69e-06
89	-10.0239	+	NA	NA	NA	+	0.803212	NA	+	NA	NA	NA	5	-868.646	1747.3	20.9602	1.69e-06
607	-9.94015	+	NA	0.650719	-0.670352	+	0.808057	NA	+	NA	NA	0.186317	8	-865.659	1747.33	20.9933	1.66e-06
367	-4.7315	+	NA	0.802459	-0.403622	+	NA	2.38808	+	NA	-8.84e-05	NA	8	-865.66	1747.33	20.9936	1.66e-06
286	-10.2448	+	0.242399	NA	-0.72098	+	0.911445	NA	NA	NA	-0.00163768	NA	7	-866.706	1747.42	21.0837	1.59e-06
794	-10.5061	+	0.268809	NA	NA	+	0.91414	NA	NA	NA	-0.00164657	0.273935	7	-866.708	1747.42	21.0872	1.59e-06
797	-10.1684	+	NA	NA	-0.707071	+	0.900799	NA	NA	NA	-0.00169471	0.241979	7	-866.739	1747.49	21.1489	1.54e-06
991	-9.70416	+	NA	0.657726	-0.737961	+	0.880841	NA	+	-0.0752158	-0.00119134	0.259224	10	-863.75	1747.52	21.1803	1.51e-06
410	-10.1499	+	0.224376	NA	NA	+	0.903757	NA	NA	-0.0609968	-0.00116948	NA	7	-866.769	1747.55	21.209	1.49e-06
492	-4.38533	+	0.188494	0.806464	NA	+	NA	2.38727	+	-0.106708	0.000612966	NA	9	-864.774	1747.56	21.225	1.48e-06
988	-9.94509	+	0.250561	0.663006	NA	+	0.88056	NA	+	-0.0677868	-0.00119924	0.284956	10	-863.775	1747.57	21.2301	1.48e-06
480	-9.89614	+	0.230735	0.672094	-0.759101	+	0.898526	NA	+	-0.0593167	-0.00123842	NA	10	-863.782	1747.58	21.2446	1.47e-06
864	-10.3738	+	0.278381	0.666345	-0.713572	+	0.921737	NA	+	NA	-0.0016887	0.237319	10	-863.797	1747.61	21.274	1.44e-06
240	-4.28496	+	0.187007	0.809129	-0.38035	+	NA	2.39235	+	-0.0852441	NA	NA	9	-864.827	1747.67	21.332	1.4e-06
669	-9.28348	+	NA	NA	-0.67747	+	0.815744	NA	NA	-0.121359	NA	0.283646	7	-866.84	1747.69	21.3527	1.39e-06
495	-4.24359	+	NA	0.801898	-0.389364	+	NA	2.39165	+	-0.11147	0.000611957	NA	9	-864.86	1747.74	21.3983	1.36e-06
666	-9.63602	+	0.217461	NA	NA	+	0.82952	NA	NA	-0.114613	NA	0.30771	7	-866.886	1747.78	21.4434	1.33e-06
349	-10.2376	+	NA	NA	-0.766437	+	0.913427	NA	+	NA	-0.00164149	NA	7	-866.991	1747.99	21.6534	1.19e-06
473	-9.81043	+	NA	NA	NA	+	0.871878	NA	+	-0.0690378	-0.00112893	NA	7	-866.994	1748	21.6592	1.19e-06
158	-9.42382	+	0.195119	NA	-0.702101	+	0.827894	NA	NA	-0.107328	NA	NA	7	-867.002	1748.01	21.6764	1.18e-06
346	-10.428	+	0.255453	NA	NA	+	0.90997	NA	+	NA	-0.0015905	NA	7	-867.031	1748.07	21.733	1.15e-06
538	-10.1522	+	0.282558	NA	NA	+	0.809802	NA	NA	NA	NA	0.2385	6	-868.04	1748.09	21.7495	1.14e-06
30	-9.91876	+	0.259881	NA	-0.634896	+	0.807208	NA	NA	NA	NA	NA	6	-868.042	1748.09	21.7539	1.14e-06
857	-10.3242	+	NA	NA	NA	+	0.896642	NA	+	NA	-0.00165367	0.259204	7	-867.055	1748.12	21.7815	1.12e-06
736	-9.48619	+	0.227397	0.657725	-0.685688	+	0.832361	NA	+	-0.113876	NA	0.270646	10	-864.077	1748.17	21.8344	1.09e-06
729	-9.43526	+	NA	NA	NA	+	0.812894	NA	+	-0.120268	NA	0.299506	7	-867.109	1748.23	21.89	1.06e-06
624	-4.86833	+	0.246003	0.800012	-0.355668	+	NA	2.39069	+	NA	NA	0.254272	9	-865.133	1748.28	21.9433	1.03e-06
541	-9.83081	+	NA	NA	-0.629497	+	0.794335	NA	NA	NA	NA	0.208356	6	-868.18	1748.37	22.03	9.89e-07
221	-9.38712	+	NA	NA	-0.741736	+	0.829252	NA	+	-0.112193	NA	NA	7	-867.185	1748.38	22.0411	9.84e-07
876	-4.91354	+	0.249122	0.800088	NA	+	NA	2.38622	+	NA	-0.000103066	0.261774	9	-865.195	1748.41	22.0675	9.71e-07
608	-10.1366	+	0.29671	0.658254	-0.649256	+	0.826552	NA	+	NA	NA	0.204681	9	-865.237	1748.49	22.1525	9.31e-07
90	-10.2028	+	0.273256	NA	NA	+	0.820884	NA	+	NA	NA	NA	6	-868.288	1748.58	22.2447	8.89e-07
218	-9.59429	+	0.207429	NA	NA	+	0.826177	NA	+	-0.105396	NA	NA	7	-867.288	1748.59	22.2477	8.87e-07
925	-9.70826	+	NA	NA	-0.717201	+	0.880854	NA	NA	-0.0776815	-0.00117192	0.282031	8	-866.303	1748.62	22.2796	8.73e-07
93	-9.9984	+	NA	NA	-0.699583	+	0.819155	NA	+	NA	NA	NA	6	-868.36	1748.73	22.3896	8.27e-07
922	-10.0819	+	0.231568	NA	NA	+	0.895476	NA	NA	-0.0705477	-0.0011724	0.308337	8	-866.362	1748.74	22.3989	8.23e-07
1004	-4.4042	+	0.199474	0.796836	NA	+	NA	2.38969	+	-0.114464	0.000599401	0.30248	10	-864.394	1748.81	22.468	7.95e-07
368	-4.78967	+	0.231633	0.808583	-0.384705	+	NA	2.38966	+	NA	-5.46e-05	NA	9	-865.403	1748.82	22.4839	7.89e-07
879	-4.77782	+	NA	0.794053	-0.377714	+	NA	2.38905	+	NA	-0.000138152	0.242279	9	-865.412	1748.84	22.5022	7.81e-07
601	-10.0774	+	NA	NA	NA	+	0.803787	NA	+	NA	NA	0.225334	6	-868.425	1748.86	22.5195	7.75e-07
798	-10.2587	+	0.254038	NA	-0.673833	+	0.90775	NA	NA	NA	-0.00169039	0.255055	8	-866.425	1748.86	22.5241	7.73e-07
414	-9.87124	+	0.208468	NA	-0.74117	+	0.895971	NA	NA	-0.0618217	-0.00121639	NA	8	-866.434	1748.88	22.5421	7.66e-07
752	-4.31187	+	0.198334	0.799598	-0.343833	+	NA	2.39451	+	-0.0933443	NA	0.299621	10	-864.455	1748.93	22.5913	7.47e-07
105	-4.82079	+	NA	NA	NA	+	NA	2.20474	+	NA	NA	NA	5	-869.47	1748.94	22.6073	7.41e-07
992	-9.91898	+	0.240903	0.663902	-0.72076	+	0.898868	NA	+	-0.0673372	-0.0012388	0.269547	11	-863.474	1748.97	22.6317	7.32e-07
1007	-4.26462	+	NA	0.792041	-0.355009	+	NA	2.39332	+	-0.119196	0.000600121	0.28837	10	-864.514	1749.05	22.7082	7.05e-07
985	-9.82164	+	NA	NA	NA	+	0.872108	NA	+	-0.0783119	-0.00112787	0.298929	8	-866.612	1749.24	22.8989	6.41e-07
670	-9.38378	+	0.203307	NA	-0.648278	+	0.821239	NA	NA	-0.116298	NA	0.290317	8	-866.642	1749.3	22.9582	6.22e-07
477	-9.79009	+	NA	NA	-0.776391	+	0.892042	NA	+	-0.0686239	-0.00117395	NA	8	-866.643	1749.3	22.9599	6.22e-07
350	-10.4016	+	0.246053	NA	-0.752049	+	0.92902	NA	+	NA	-0.00163173	NA	8	-866.697	1749.41	23.0687	5.89e-07
496	-4.31151	+	0.184207	0.806743	-0.375043	+	NA	2.39239	+	-0.106475	0.000607348	NA	10	-864.7	1749.42	23.0799	5.85e-07
858	-10.5044	+	0.268772	NA	NA	+	0.913955	NA	+	NA	-0.00164672	0.273891	8	-866.708	1749.43	23.0899	5.82e-07
861	-10.3012	+	NA	NA	-0.733251	+	0.915658	NA	+	NA	-0.00169027	0.244465	8	-866.732	1749.48	23.1385	5.68e-07
474	-10.0078	+	0.220542	NA	NA	+	0.888856	NA	+	-0.0615392	-0.00117255	NA	8	-866.762	1749.54	23.1989	5.52e-07
233	-4.27635	+	NA	NA	NA	+	NA	2.20778	+	-0.0909532	NA	NA	6	-868.811	1749.63	23.2911	5.27e-07
542	-9.92485	+	0.270364	NA	-0.594348	+	0.801591	NA	NA	NA	NA	0.222412	7	-867.827	1749.66	23.3264	5.17e-07
733	-9.40183	+	NA	NA	-0.701668	+	0.828946	NA	+	-0.121031	NA	0.285666	8	-866.835	1749.68	23.3455	5.13e-07
730	-9.61424	+	0.216883	NA	NA	+	0.827232	NA	+	-0.114696	NA	0.307256	8	-866.886	1749.78	23.4458	4.87e-07
222	-9.55211	+	0.198174	NA	-0.727812	+	0.842129	NA	+	-0.106822	NA	NA	8	-866.997	1750.01	23.668	4.36e-07
94	-10.1732	+	0.26531	NA	-0.683474	+	0.836022	NA	+	NA	NA	NA	7	-868.021	1750.05	23.7133	4.26e-07
602	-10.2664	+	0.285313	NA	NA	+	0.822082	NA	+	NA	NA	0.241018	7	-868.036	1750.08	23.744	4.2e-07
926	-9.83019	+	0.216622	NA	-0.687626	+	0.8891	NA	NA	-0.0707216	-0.00121567	0.28913	9	-866.077	1750.17	23.8322	4.02e-07
880	-4.84181	+	0.244643	0.800408	-0.356019	+	NA	2.3909	+	NA	-0.000105583	0.256424	10	-865.128	1750.27	23.9372	3.81e-07
617	-4.88176	+	NA	NA	NA	+	NA	2.2079	+	NA	NA	0.27544	6	-869.148	1750.3	23.9662	3.76e-07
605	-10.0507	+	NA	NA	-0.671437	+	0.819166	NA	+	NA	NA	0.212287	7	-868.164	1750.34	23.9995	3.7e-07
106	-4.86348	+	0.212671	NA	NA	+	NA	2.2053	+	NA	NA	NA	6	-869.254	1750.51	24.1768	3.38e-07
989	-9.80275	+	NA	NA	-0.736408	+	0.891376	NA	+	-0.0774731	-0.0011704	0.283695	9	-866.299	1750.61	24.2761	3.22e-07
1008	-4.33738	+	0.195485	0.797232	-0.338577	+	NA	2.39426	+	-0.1141	0.000594663	0.297006	11	-864.333	1750.69	24.3514	3.1e-07
986	-10.0274	+	0.230068	NA	NA	+	0.88978	NA	+	-0.0707329	-0.00117354	0.307162	9	-866.361	1750.74	24.4001	3.03e-07
745	-4.29372	+	NA	NA	NA	+	NA	2.21253	+	-0.10003	NA	0.326035	7	-868.367	1750.74	24.4065	3.02e-07
109	-4.74275	+	NA	NA	-0.402403	+	NA	2.21009	+	NA	NA	NA	6	-869.385	1750.78	24.4389	2.97e-07
862	-10.4763	+	0.259199	NA	-0.715668	+	0.93202	NA	+	NA	-0.00168291	0.259265	9	-866.408	1750.83	24.4935	2.89e-07
478	-9.9803	+	0.211161	NA	-0.762984	+	0.908046	NA	+	-0.0614056	-0.00121527	NA	9	-866.43	1750.87	24.5369	2.83e-07
361	-4.80879	+	NA	NA	NA	+	NA	2.20473	+	NA	-4.75e-05	NA	6	-869.469	1750.94	24.6074	2.73e-07
734	-9.57471	+	0.207887	NA	-0.685868	+	0.842378	NA	+	-0.11564	NA	0.29359	9	-866.63	1751.27	24.9367	2.31e-07
489	-4.30583	+	NA	NA	NA	+	NA	2.20879	+	-0.11429	0.000670516	NA	7	-868.657	1751.32	24.9862	2.26e-07
234	-4.33617	+	0.167743	NA	NA	+	NA	2.20778	+	-0.0865578	NA	NA	7	-868.677	1751.36	25.0268	2.21e-07
237	-4.20097	+	NA	NA	-0.392489	+	NA	2.21309	+	-0.0907972	NA	NA	7	-868.73	1751.47	25.1318	2.1e-07
606	-10.2357	+	0.277161	NA	-0.652106	+	0.836588	NA	+	NA	NA	0.228127	8	-867.796	1751.6	25.2659	1.96e-07
618	-4.92963	+	0.22599	NA	NA	+	NA	2.20869	+	NA	NA	0.287465	7	-868.906	1751.82	25.4829	1.76e-07
990	-10.0015	+	0.220887	NA	-0.721271	+	0.908026	NA	+	-0.0701756	-0.00121358	0.292159	10	-866.067	1752.15	25.8152	1.49e-07
621	-4.80823	+	NA	NA	-0.373265	+	NA	2.21275	+	NA	NA	0.270168	7	-869.076	1752.16	25.8232	1.48e-07
873	-4.85614	+	NA	NA	NA	+	NA	2.20799	+	NA	-0.000103283	0.277548	7	-869.144	1752.3	25.9596	1.39e-07
110	-4.78775	+	0.20834	NA	-0.385837	+	NA	2.21025	+	NA	NA	NA	7	-869.177	1752.36	26.0259	1.34e-07
746	-4.3575	+	0.178015	NA	NA	+	NA	2.21263	+	-0.0955384	NA	0.332571	8	-868.218	1752.45	26.1101	1.29e-07
1001	-4.322	+	NA	NA	NA	+	NA	2.21317	+	-0.122941	0.000658289	0.323541	8	-868.22	1752.45	26.1137	1.28e-07
362	-4.85941	+	0.212457	NA	NA	+	NA	2.2053	+	NA	-1.59e-05	NA	7	-869.254	1752.52	26.1789	1.24e-07
749	-4.22543	+	NA	NA	-0.35422	+	NA	2.2172	+	-0.0997303	NA	0.320519	8	-868.302	1752.62	26.2782	1.18e-07
365	-4.72985	+	NA	NA	-0.402656	+	NA	2.2101	+	NA	-5.09e-05	NA	7	-869.384	1752.78	26.4391	1.09e-07
490	-4.36466	+	0.16465	NA	NA	+	NA	2.20876	+	-0.109802	0.000666789	NA	8	-868.529	1753.07	26.732	9.43e-08
493	-4.23166	+	NA	NA	-0.38581	+	NA	2.21396	+	-0.113899	0.000664443	NA	8	-868.58	1753.17	26.8336	8.96e-08
238	-4.26167	+	0.163597	NA	-0.380192	+	NA	2.21277	+	-0.0865141	NA	NA	8	-868.603	1753.22	26.8807	8.75e-08
622	-4.85898	+	0.22182	NA	-0.354053	+	NA	2.21311	+	NA	NA	0.282323	8	-868.842	1753.7	27.3578	6.89e-08
874	-4.91146	+	0.225076	NA	NA	+	NA	2.20874	+	NA	-7.24e-05	0.288875	8	-868.903	1753.82	27.4813	6.48e-08
877	-4.78204	+	NA	NA	-0.373499	+	NA	2.21284	+	NA	-0.000105298	0.272293	8	-869.071	1754.15	27.8166	5.48e-08
1002	-4.38476	+	0.174872	NA	NA	+	NA	2.21321	+	-0.11831	0.000653775	0.329967	9	-868.075	1754.17	27.8283	5.45e-08
1005	-4.25484	+	NA	NA	-0.347872	+	NA	2.21776	+	-0.122458	0.000653611	0.318162	9	-868.157	1754.33	27.9913	5.02e-08
750	-4.29052	+	0.174209	NA	-0.340282	+	NA	2.21694	+	-0.0953454	NA	0.327213	9	-868.159	1754.33	27.9947	5.01e-08
366	-4.78264	+	0.208073	NA	-0.385969	+	NA	2.21025	+	NA	-1.99e-05	NA	8	-869.177	1754.37	28.0283	4.93e-08
494	-4.29132	+	0.160594	NA	-0.373793	+	NA	2.21366	+	-0.10952	0.000660895	NA	9	-868.457	1754.93	28.5922	3.72e-08
878	-4.84013	+	0.220876	NA	-0.35433	+	NA	2.21316	+	NA	-7.49e-05	0.283767	9	-868.839	1755.69	29.3563	2.54e-08
1006	-4.31898	+	0.171135	NA	-0.334059	+	NA	2.21748	+	-0.117926	0.000648888	0.324736	10	-868.019	1756.06	29.7182	2.12e-08
299	-7.19585	+	NA	0.797947	NA	+	NA	2.31526	NA	NA	0.00183662	NA	6	-873.735	1759.48	33.1402	3.83e-09
75	-4.28066	+	NA	0.657667	NA	+	NA	NA	+	NA	NA	NA	5	-874.773	1759.55	33.2131	3.69e-09
427	-6.52999	+	NA	0.797345	NA	+	NA	2.31856	NA	-0.136135	0.00263898	NA	7	-872.791	1759.59	33.2538	3.62e-09
303	-6.76201	+	NA	0.799239	-1.33207	+	NA	2.33431	NA	NA	0.00168715	NA	7	-872.935	1759.88	33.5421	3.13e-09
431	-6.12717	+	NA	0.798824	-1.29429	+	NA	2.33744	NA	-0.132327	0.00247157	NA	8	-872.036	1760.08	33.7458	2.83e-09
47	-6.61302	+	NA	0.805804	-1.5024	+	NA	2.32887	NA	NA	NA	NA	6	-874.046	1760.1	33.7609	2.81e-09
43	-7.09262	+	NA	0.804946	NA	+	NA	2.30724	NA	NA	NA	NA	5	-875.052	1760.11	33.7709	2.79e-09
939	-6.48623	+	NA	0.784467	NA	+	NA	2.32299	NA	-0.145244	0.00255013	0.408422	8	-872.109	1760.23	33.8932	2.63e-09
203	-3.72906	+	NA	0.659431	NA	+	NA	NA	+	-0.0919575	NA	NA	6	-874.119	1760.25	33.9077	2.61e-09
811	-7.2006	+	NA	0.786342	NA	+	NA	2.31884	NA	NA	0.00171361	0.363446	7	-873.19	1760.39	34.0524	2.43e-09
300	-7.25551	+	0.335974	0.806931	NA	+	NA	2.3206	NA	NA	0.00186919	NA	7	-873.208	1760.43	34.0877	2.38e-09
555	-7.09995	+	NA	0.792068	NA	+	NA	2.31319	NA	NA	NA	0.416775	6	-874.337	1760.68	34.3426	2.1e-09
428	-6.6256	+	0.289478	0.805038	NA	+	NA	2.32266	NA	-0.127829	0.00262108	NA	8	-872.401	1760.81	34.476	1.96e-09
559	-6.64881	+	NA	0.793546	-1.42143	+	NA	2.33344	NA	NA	NA	0.387259	7	-873.427	1760.86	34.5254	1.91e-09
943	-6.10962	+	NA	0.786463	-1.22418	+	NA	2.34081	NA	-0.141257	0.00239993	0.385298	9	-871.428	1760.87	34.5334	1.91e-09
815	-6.78724	+	NA	0.788162	-1.27491	+	NA	2.33696	NA	NA	0.00158027	0.340934	8	-872.455	1760.92	34.5839	1.86e-09
304	-6.83169	+	0.31606	0.807535	-1.2958	+	NA	2.33817	NA	NA	0.00172337	NA	8	-872.466	1760.94	34.607	1.84e-09
76	-4.32562	+	0.230357	0.663662	NA	+	NA	NA	+	NA	NA	NA	6	-874.518	1761.04	34.705	1.75e-09
587	-4.33463	+	NA	0.649426	NA	+	NA	NA	+	NA	NA	0.244819	6	-874.519	1761.05	34.7075	1.75e-09
44	-7.14977	+	0.328372	0.813722	NA	+	NA	2.31226	NA	NA	NA	NA	6	-874.547	1761.1	34.7636	1.7e-09
48	-6.67819	+	0.306974	0.813851	-1.47127	+	NA	2.3324	NA	NA	NA	NA	7	-873.602	1761.21	34.8765	1.61e-09
812	-7.26266	+	0.350129	0.795965	NA	+	NA	2.32475	NA	NA	0.00174211	0.378479	8	-872.62	1761.25	34.9155	1.58e-09
940	-6.58473	+	0.300553	0.792841	NA	+	NA	2.3275	NA	-0.136834	0.00252965	0.417801	9	-871.691	1761.4	35.0587	1.47e-09
432	-6.22648	+	0.270716	0.805871	-1.26602	+	NA	2.34024	NA	-0.124656	0.00245956	NA	9	-871.693	1761.4	35.0634	1.46e-09
79	-4.21701	+	NA	0.65764	-0.323492	+	NA	NA	+	NA	NA	NA	6	-874.72	1761.45	35.1086	1.43e-09
715	-3.74411	+	NA	0.649988	NA	+	NA	NA	+	-0.100149	NA	0.293631	7	-873.759	1761.53	35.1904	1.37e-09
331	-4.26168	+	NA	0.657944	NA	+	NA	NA	+	NA	-7.5e-05	NA	6	-874.771	1761.55	35.2105	1.36e-09
556	-7.15979	+	0.344559	0.801649	NA	+	NA	2.31893	NA	NA	NA	0.431851	7	-873.784	1761.58	35.2399	1.34e-09
175	-6.39289	+	NA	0.806651	-1.51467	+	NA	2.32886	NA	-0.0413215	NA	NA	7	-873.936	1761.88	35.5448	1.15e-09
560	-6.71833	+	0.323175	0.802297	-1.38522	+	NA	2.33758	NA	NA	NA	0.402407	8	-872.938	1761.89	35.5511	1.15e-09
816	-6.86081	+	0.330285	0.797006	-1.23435	+	NA	2.34128	NA	NA	0.00161287	0.356077	9	-871.945	1761.91	35.5685	1.14e-09
204	-3.79446	+	0.186913	0.664133	NA	+	NA	NA	+	-0.0871196	NA	NA	7	-873.953	1761.91	35.5771	1.13e-09
171	-6.88974	+	NA	0.805662	NA	+	NA	2.30698	NA	-0.0387919	NA	NA	6	-874.957	1761.92	35.5826	1.13e-09
459	-3.75766	+	NA	0.657479	NA	+	NA	NA	+	-0.114216	0.000642142	NA	7	-873.983	1761.98	35.6376	1.1e-09
944	-6.21272	+	0.282228	0.794116	-1.19315	+	NA	2.34397	NA	-0.133486	0.00238556	0.394966	10	-871.057	1762.13	35.7953	1.01e-09
207	-3.66804	+	NA	0.659432	-0.312068	+	NA	NA	+	-0.0918642	NA	NA	7	-874.07	1762.15	35.8111	1.01e-09
683	-6.82589	+	NA	0.792513	NA	+	NA	2.31351	NA	-0.0519528	NA	0.442552	7	-874.165	1762.34	36.0012	9.15e-10
588	-4.38504	+	0.243411	0.655668	NA	+	NA	NA	+	NA	NA	0.258838	7	-874.236	1762.48	36.1435	8.53e-10
687	-6.36395	+	NA	0.794082	-1.42991	+	NA	2.33407	NA	-0.0535648	NA	0.413549	8	-873.243	1762.5	36.1605	8.45e-10
73	-4.30739	+	NA	NA	NA	+	NA	NA	+	NA	NA	NA	4	-877.313	1762.63	36.2916	7.92e-10
80	-4.26478	+	0.227262	0.663538	-0.306121	+	NA	NA	+	NA	NA	NA	7	-874.471	1762.95	36.6142	6.74e-10
591	-4.27524	+	NA	0.649523	-0.297414	+	NA	NA	+	NA	NA	0.240763	7	-874.474	1762.96	36.6206	6.72e-10
172	-6.98918	+	0.317013	0.813935	NA	+	NA	2.31181	NA	-0.0305194	NA	NA	7	-874.49	1762.99	36.6515	6.61e-10
843	-4.30409	+	NA	0.649824	NA	+	NA	NA	+	NA	-0.000122775	0.247136	7	-874.513	1763.04	36.6976	6.46e-10
332	-4.31501	+	0.22983	0.663793	NA	+	NA	NA	+	NA	-4.15e-05	NA	7	-874.517	1763.04	36.7059	6.44e-10
176	-6.49748	+	0.294209	0.814163	-1.48286	+	NA	2.33217	NA	-0.0335699	NA	NA	8	-873.532	1763.08	36.7394	6.33e-10
716	-3.81364	+	0.197693	0.655032	NA	+	NA	NA	+	-0.0952504	NA	0.301883	8	-873.574	1763.16	36.8223	6.07e-10
971	-3.77197	+	NA	0.648021	NA	+	NA	NA	+	-0.122125	0.000634251	0.291774	8	-873.627	1763.27	36.9283	5.76e-10
201	-3.75268	+	NA	NA	NA	+	NA	NA	+	-0.0924849	NA	NA	5	-876.669	1763.34	37.0058	5.54e-10
684	-6.92789	+	0.328433	0.801563	NA	+	NA	2.31884	NA	-0.0437018	NA	0.452379	8	-873.666	1763.34	37.0064	5.54e-10
335	-4.19729	+	NA	0.657923	-0.323868	+	NA	NA	+	NA	-7.77e-05	NA	7	-874.717	1763.44	37.106	5.27e-10
719	-3.68973	+	NA	0.650106	-0.277246	+	NA	NA	+	-0.0999439	NA	0.289437	8	-873.72	1763.45	37.1155	5.24e-10
688	-6.47209	+	0.306032	0.802277	-1.39497	+	NA	2.33779	NA	-0.045818	NA	0.423643	9	-872.808	1763.63	37.2933	4.8e-10
460	-3.82247	+	0.184076	0.662157	NA	+	NA	NA	+	-0.109212	0.000637712	NA	8	-873.821	1763.66	37.3174	4.74e-10
208	-3.73506	+	0.184015	0.664045	-0.298887	+	NA	NA	+	-0.0870989	NA	NA	8	-873.908	1763.83	37.491	4.35e-10
463	-3.69793	+	NA	0.657516	-0.305641	+	NA	NA	+	-0.113926	0.000637759	NA	8	-873.936	1763.88	37.5459	4.23e-10
585	-4.36635	+	NA	NA	NA	+	NA	NA	+	NA	NA	0.269826	5	-877.004	1764.01	37.6759	3.96e-10
74	-4.34921	+	0.210759	NA	NA	+	NA	NA	+	NA	NA	NA	5	-877.099	1764.2	37.8663	3.6e-10
592	-4.32909	+	0.240443	0.655657	-0.277241	+	NA	NA	+	NA	NA	0.254946	8	-874.198	1764.41	38.0706	3.25e-10
844	-4.36236	+	0.242334	0.655928	NA	+	NA	NA	+	NA	-9.03e-05	0.260456	8	-874.233	1764.48	38.1398	3.14e-10
713	-3.76861	+	NA	NA	NA	+	NA	NA	+	-0.101309	NA	0.317865	6	-876.247	1764.5	38.1634	3.11e-10
77	-4.2429	+	NA	NA	-0.327741	+	NA	NA	+	NA	NA	NA	5	-877.26	1764.52	38.1865	3.07e-10
329	-4.29531	+	NA	NA	NA	+	NA	NA	+	NA	-4.78e-05	NA	5	-877.312	1764.63	38.2914	2.91e-10
297	-7.2308	+	NA	NA	NA	+	NA	2.14178	NA	NA	0.00190249	NA	5	-877.402	1764.81	38.4723	2.66e-10
972	-3.84063	+	0.194777	0.653035	NA	+	NA	NA	+	-0.117047	0.000628954	0.299897	9	-873.447	1764.91	38.5714	2.53e-10
425	-6.55145	+	NA	NA	NA	+	NA	2.14538	NA	-0.138757	0.00271975	NA	6	-876.453	1764.91	38.5746	2.53e-10
847	-4.24425	+	NA	0.649922	-0.297664	+	NA	NA	+	NA	-0.00012433	0.243086	8	-874.468	1764.95	38.6108	2.48e-10
336	-4.25336	+	0.226697	0.663683	-0.306395	+	NA	NA	+	NA	-4.45e-05	NA	8	-874.47	1764.95	38.6154	2.48e-10
457	-3.7833	+	NA	NA	NA	+	NA	NA	+	-0.115999	0.000680109	NA	6	-876.52	1765.05	38.7102	2.36e-10
202	-3.81207	+	0.167654	NA	NA	+	NA	NA	+	-0.0881119	NA	NA	6	-876.535	1765.08	38.7399	2.33e-10
720	-3.76133	+	0.195058	0.655056	-0.262203	+	NA	NA	+	-0.0951183	NA	0.297881	9	-873.54	1765.1	38.7574	2.31e-10
975	-3.71867	+	NA	0.648158	-0.270963	+	NA	NA	+	-0.121763	0.000630257	0.287698	9	-873.59	1765.2	38.8577	2.19e-10
301	-6.79375	+	NA	NA	-1.34223	+	NA	2.15989	NA	NA	0.00175227	NA	6	-876.615	1765.24	38.8999	2.15e-10
205	-3.69117	+	NA	NA	-0.315299	+	NA	NA	+	-0.0923653	NA	NA	6	-876.62	1765.25	38.9092	2.14e-10
937	-6.50357	+	NA	NA	NA	+	NA	2.15232	NA	-0.148498	0.00262637	0.435766	7	-875.675	1765.36	39.0213	2.02e-10
429	-6.14713	+	NA	NA	-1.30056	+	NA	2.16327	NA	-0.134817	0.00255101	NA	7	-875.712	1765.43	39.0956	1.95e-10
41	-7.12563	+	NA	NA	NA	+	NA	2.13191	NA	NA	NA	NA	4	-878.766	1765.53	39.1973	1.85e-10
586	-4.41315	+	0.223702	NA	NA	+	NA	NA	+	NA	NA	0.281656	6	-876.765	1765.54	39.1996	1.85e-10
45	-6.64039	+	NA	NA	-1.51992	+	NA	2.15267	NA	NA	NA	NA	5	-877.77	1765.55	39.2083	1.84e-10
809	-7.23505	+	NA	NA	NA	+	NA	2.14762	NA	NA	0.00177155	0.390953	6	-876.77	1765.55	39.2102	1.84e-10
464	-3.76409	+	0.181246	0.662102	-0.292646	+	NA	NA	+	-0.109046	0.000633662	NA	9	-873.779	1765.57	39.2359	1.82e-10
298	-7.28684	+	0.311408	NA	NA	+	NA	2.14479	NA	NA	0.00193353	NA	6	-876.949	1765.91	39.5679	1.54e-10
553	-7.13227	+	NA	NA	NA	+	NA	2.14038	NA	NA	NA	0.44353	5	-877.955	1765.92	39.5778	1.53e-10
589	-4.30671	+	NA	NA	-0.298789	+	NA	NA	+	NA	NA	0.26584	6	-876.96	1765.93	39.59	1.52e-10
841	-4.34162	+	NA	NA	NA	+	NA	NA	+	NA	-9.94e-05	0.271627	6	-877	1766.01	39.6702	1.46e-10
941	-6.12732	+	NA	NA	-1.22491	+	NA	2.16906	NA	-0.144422	0.00247568	0.413225	8	-875.011	1766.03	39.6971	1.44e-10
78	-4.28721	+	0.207718	NA	-0.312067	+	NA	NA	+	NA	NA	NA	6	-877.052	1766.11	39.7737	1.39e-10
813	-6.82037	+	NA	NA	-1.28004	+	NA	2.16472	NA	NA	0.00163785	0.369006	7	-876.051	1766.11	39.7743	1.39e-10
557	-6.6777	+	NA	NA	-1.43296	+	NA	2.15968	NA	NA	NA	0.414722	6	-877.06	1766.13	39.7895	1.38e-10
714	-3.83189	+	0.177864	NA	NA	+	NA	NA	+	-0.0968424	NA	0.324485	7	-876.097	1766.2	39.8656	1.33e-10
330	-4.34497	+	0.210552	NA	NA	+	NA	NA	+	NA	-1.66e-05	NA	6	-877.099	1766.21	39.8681	1.32e-10
969	-3.79844	+	NA	NA	NA	+	NA	NA	+	-0.124563	0.000672798	0.316085	7	-876.102	1766.21	39.8756	1.32e-10
426	-6.6399	+	0.264978	NA	NA	+	NA	2.1475	NA	-0.13112	0.00270395	NA	7	-876.126	1766.26	39.9229	1.29e-10
848	-4.30586	+	0.239347	0.655924	-0.277561	+	NA	NA	+	NA	-9.22e-05	0.256591	9	-874.195	1766.4	40.0669	1.2e-10
717	-3.71435	+	NA	NA	-0.277332	+	NA	NA	+	-0.101085	NA	0.313748	7	-876.209	1766.43	40.0899	1.19e-10
302	-6.85873	+	0.292061	NA	-1.30898	+	NA	2.16172	NA	NA	0.00178641	NA	7	-876.215	1766.44	40.1013	1.18e-10
333	-4.2301	+	NA	NA	-0.327993	+	NA	NA	+	NA	-5.05e-05	NA	6	-877.259	1766.52	40.1865	1.13e-10
810	-7.29322	+	0.324334	NA	NA	+	NA	2.15098	NA	NA	0.00179948	0.403088	7	-876.281	1766.57	40.2341	1.1e-10
938	-6.59454	+	0.274419	NA	NA	+	NA	2.1546	NA	-0.140755	0.00260874	0.442855	8	-875.325	1766.66	40.3253	1.05e-10
42	-7.17925	+	0.303808	NA	NA	+	NA	2.13466	NA	NA	NA	NA	5	-878.334	1766.67	40.3349	1.05e-10
458	-3.84188	+	0.164676	NA	NA	+	NA	NA	+	-0.111509	0.000676687	NA	7	-876.391	1766.79	40.4542	9.88e-11
46	-6.701	+	0.283004	NA	-1.49152	+	NA	2.15425	NA	NA	NA	NA	6	-877.394	1766.79	40.4565	9.87e-11
976	-3.78937	+	0.192257	0.653093	-0.255986	+	NA	NA	+	-0.116759	0.000625245	0.296015	10	-873.415	1766.85	40.5105	9.6e-11
430	-6.23835	+	0.246803	NA	-1.27524	+	NA	2.16436	NA	-0.127789	0.00254036	NA	8	-875.427	1766.87	40.5285	9.52e-11
461	-3.72326	+	NA	NA	-0.308005	+	NA	NA	+	-0.115675	0.000675816	NA	7	-876.474	1766.96	40.619	9.1e-11
554	-7.18818	+	0.318403	NA	NA	+	NA	2.14357	NA	NA	NA	0.455674	6	-877.483	1766.97	40.6357	9.02e-11
206	-3.75187	+	0.164825	NA	-0.303697	+	NA	NA	+	-0.0880682	NA	NA	7	-876.49	1766.99	40.6526	8.94e-11
814	-6.88876	+	0.305234	NA	-1.2431	+	NA	2.16682	NA	NA	0.0016693	0.38128	8	-875.616	1767.24	40.9068	7.88e-11
558	-6.74206	+	0.297814	NA	-1.4003	+	NA	2.16161	NA	NA	NA	0.426973	7	-876.645	1767.3	40.9618	7.66e-11
173	-6.42187	+	NA	NA	-1.53119	+	NA	2.15251	NA	-0.0410773	NA	NA	6	-877.666	1767.34	41.0023	7.51e-11
169	-6.92364	+	NA	NA	NA	+	NA	2.13153	NA	-0.0386382	NA	NA	5	-878.675	1767.35	41.017	7.45e-11
942	-6.22187	+	0.256852	NA	-1.1973	+	NA	2.17031	NA	-0.137286	0.00246341	0.420615	9	-874.704	1767.42	41.0857	7.2e-11
590	-4.35656	+	0.220816	NA	-0.280557	+	NA	NA	+	NA	NA	0.277823	7	-876.727	1767.46	41.1262	7.06e-11
842	-4.39587	+	0.222888	NA	NA	+	NA	NA	+	NA	-6.87e-05	0.282843	7	-876.763	1767.54	41.1983	6.81e-11
681	-6.85505	+	NA	NA	NA	+	NA	2.1406	NA	-0.0525451	NA	0.468692	6	-877.785	1767.58	41.2401	6.67e-11
685	-6.39023	+	NA	NA	-1.44046	+	NA	2.16017	NA	-0.0540842	NA	0.440337	7	-876.879	1767.77	41.4301	6.06e-11
845	-4.28153	+	NA	NA	-0.299033	+	NA	NA	+	NA	-0.000100961	0.267652	7	-876.956	1767.92	41.5844	5.61e-11
970	-3.86098	+	0.174833	NA	NA	+	NA	NA	+	-0.119955	0.000668442	0.322597	8	-875.957	1767.93	41.5884	5.6e-11
334	-4.28217	+	0.20747	NA	-0.312198	+	NA	NA	+	NA	-1.96e-05	NA	7	-877.052	1768.11	41.7758	5.1e-11
718	-3.77936	+	0.175329	NA	-0.264131	+	NA	NA	+	-0.0966913	NA	0.320544	8	-876.063	1768.14	41.8008	5.04e-11
973	-3.74557	+	NA	NA	-0.270152	+	NA	NA	+	-0.124181	0.000669011	0.312095	8	-876.066	1768.14	41.8068	5.02e-11
308	-10.3724	+	0.509944	1.2595	NA	NA	0.864201	3.09891	NA	NA	-0.00147008	NA	7	-877.14	1768.29	41.9526	4.67e-11
170	-7.01655	+	0.292647	NA	NA	+	NA	2.13421	NA	-0.0309426	NA	NA	6	-878.277	1768.56	42.2234	4.08e-11
174	-6.51882	+	0.27051	NA	-1.5024	+	NA	2.15397	NA	-0.0338928	NA	NA	7	-877.325	1768.66	42.3214	3.88e-11
462	-3.78301	+	0.161909	NA	-0.296555	+	NA	NA	+	-0.111282	0.00067223	NA	8	-876.349	1768.71	42.3719	3.79e-11
682	-6.95014	+	0.302216	NA	NA	+	NA	2.14352	NA	-0.0448384	NA	0.476106	7	-877.363	1768.74	42.3975	3.74e-11
52	-10.0525	+	0.522931	1.25074	NA	NA	0.769585	3.10797	NA	NA	NA	NA	6	-878.37	1768.75	42.4104	3.71e-11
820	-10.3735	+	0.529467	1.23933	NA	NA	0.858277	3.09251	NA	NA	-0.00156968	0.410649	8	-876.398	1768.81	42.4703	3.6e-11
307	-10.2217	+	NA	1.25309	NA	NA	0.852069	3.10752	NA	NA	-0.00147873	NA	6	-878.45	1768.91	42.5688	3.43e-11
180	-9.65156	+	0.468733	1.25207	NA	NA	0.789323	3.10618	NA	-0.0931668	NA	NA	7	-877.486	1768.98	42.6435	3.31e-11
686	-6.49026	+	0.280676	NA	-1.40921	+	NA	2.16182	NA	-0.0468773	NA	0.44806	8	-876.513	1769.04	42.7004	3.21e-11
179	-9.45835	+	NA	1.2466	NA	NA	0.778677	3.11548	NA	-0.103621	NA	NA	6	-878.584	1769.18	42.8375	3e-11
692	-9.57006	+	0.482407	1.23012	NA	NA	0.778678	3.09899	NA	-0.106226	NA	0.43593	8	-876.661	1769.33	42.9959	2.77e-11
312	-10.0756	+	0.4894	1.26064	-0.794891	NA	0.855224	3.11705	NA	NA	-0.00152639	NA	8	-876.698	1769.41	43.0706	2.67e-11
846	-4.33874	+	0.219984	NA	-0.280829	+	NA	NA	+	NA	-7.06e-05	0.279033	8	-876.725	1769.46	43.1251	2.6e-11
51	-9.90065	+	NA	1.24385	NA	NA	0.757207	3.11777	NA	NA	NA	NA	5	-879.739	1769.48	43.1445	2.57e-11
564	-10.042	+	0.541187	1.23138	NA	NA	0.75967	3.10058	NA	NA	NA	0.368161	7	-877.771	1769.55	43.2135	2.49e-11
819	-10.2179	+	NA	1.23305	NA	NA	0.846176	3.10235	NA	NA	-0.00157116	0.382362	7	-877.798	1769.61	43.2682	2.42e-11
691	-9.37291	+	NA	1.22451	NA	NA	0.76789	3.10957	NA	-0.1164	NA	0.418298	7	-877.817	1769.64	43.3062	2.37e-11
311	-9.90072	+	NA	1.2548	-0.86094	NA	0.842004	3.12793	NA	NA	-0.00153833	NA	7	-877.907	1769.82	43.4868	2.17e-11
974	-3.80969	+	0.172367	NA	-0.25702	+	NA	NA	+	-0.119651	0.000664881	0.318777	9	-875.925	1769.87	43.5279	2.12e-11
436	-10.0786	+	0.482852	1.25815	NA	NA	0.852332	3.09969	NA	-0.050293	-0.00112641	NA	8	-876.939	1769.89	43.5529	2.1e-11
56	-9.77732	+	0.505811	1.25124	-0.70723	NA	0.758374	3.12356	NA	NA	NA	NA	7	-878.03	1770.07	43.7325	1.92e-11
824	-10.1058	+	0.509968	1.2411	-0.726323	NA	0.850857	3.10909	NA	NA	-0.00161585	0.388975	9	-876.033	1770.08	43.743	1.91e-11
184	-9.33587	+	0.447902	1.25296	-0.785207	NA	0.777882	3.12377	NA	-0.0962824	NA	NA	8	-877.086	1770.18	43.8458	1.81e-11
183	-9.11937	+	NA	1.24807	-0.855689	NA	0.766156	3.13533	NA	-0.10655	NA	NA	7	-878.09	1770.19	43.8522	1.81e-11
948	-10.0026	+	0.496915	1.23646	NA	NA	0.842409	3.09338	NA	-0.0625537	-0.00115006	0.441151	9	-876.094	1770.2	43.8661	1.79e-11
435	-9.84758	+	NA	1.25205	NA	NA	0.836543	3.10872	NA	-0.0644122	-0.00103668	NA	7	-878.101	1770.21	43.8739	1.79e-11
372	-10.0767	+	0.501884	1.2594	NA	NA	0.832461	3.10571	+	NA	-0.00148349	NA	8	-877.108	1770.23	43.8902	1.77e-11
563	-9.88719	+	NA	1.22486	NA	NA	0.747827	3.11174	NA	NA	NA	0.338881	6	-879.224	1770.46	44.1182	1.58e-11
55	-9.59952	+	NA	1.24481	-0.775011	NA	0.744674	3.13551	NA	NA	NA	NA	6	-879.313	1770.63	44.2955	1.45e-11
947	-9.76632	+	NA	1.23016	NA	NA	0.826298	3.10364	NA	-0.0765462	-0.00105604	0.422807	8	-877.318	1770.65	44.3097	1.44e-11
823	-9.92326	+	NA	1.23559	-0.800396	NA	0.837648	3.12132	NA	NA	-0.00162084	0.358785	8	-877.334	1770.68	44.3432	1.41e-11
696	-9.29093	+	0.463196	1.23163	-0.713064	NA	0.769284	3.11495	NA	-0.108464	NA	0.415789	9	-876.336	1770.69	44.3489	1.41e-11
116	-9.87029	+	0.518366	1.25063	NA	NA	0.749735	3.11191	+	NA	NA	NA	7	-878.359	1770.73	44.3899	1.38e-11
371	-9.76179	+	NA	1.25316	NA	NA	0.802496	3.11877	+	NA	-0.001499	NA	7	-878.367	1770.74	44.4058	1.37e-11
884	-10.198	+	0.524557	1.23942	NA	NA	0.839546	3.09655	+	NA	-0.00157668	0.406147	9	-876.387	1770.79	44.4507	1.34e-11
695	-9.06892	+	NA	1.22674	-0.788817	NA	0.757471	3.12785	NA	-0.118456	NA	0.396052	8	-877.403	1770.82	44.4804	1.32e-11
244	-9.3323	+	0.459894	1.2519	NA	NA	0.755428	3.11325	+	-0.0945326	NA	NA	8	-877.451	1770.91	44.5764	1.26e-11
440	-9.7659	+	0.46107	1.25942	-0.819903	NA	0.842914	3.11834	NA	-0.0516939	-0.00117485	NA	9	-876.484	1770.98	44.6457	1.21e-11
568	-9.79414	+	0.524889	1.23257	-0.645955	NA	0.750322	3.11474	NA	NA	NA	0.349282	8	-877.492	1771	44.6586	1.21e-11
243	-8.97794	+	NA	1.24656	NA	NA	0.727236	3.12684	+	-0.105296	NA	NA	7	-878.499	1771.01	44.6707	1.2e-11
439	-9.51454	+	NA	1.25399	-0.889344	NA	0.826381	3.12964	NA	-0.0653066	-0.0010922	NA	8	-877.546	1771.1	44.767	1.14e-11
756	-9.37329	+	0.476877	1.23017	NA	NA	0.757843	3.10338	+	-0.106945	NA	0.431406	9	-876.647	1771.31	44.9724	1.03e-11
115	-9.54869	+	NA	1.24377	NA	NA	0.718732	3.12584	+	NA	NA	NA	6	-879.694	1771.39	45.0573	9.89e-12
376	-10.0485	+	0.488752	1.26062	-0.789326	NA	0.852155	3.11761	+	NA	-0.00152734	NA	9	-876.698	1771.41	45.073	9.81e-12
952	-9.72539	+	0.476691	1.23833	-0.747652	NA	0.834844	3.1104	NA	-0.0632259	-0.00119301	0.419338	10	-875.721	1771.46	45.1234	9.57e-12
883	-9.86301	+	NA	1.23345	NA	NA	0.808115	3.11104	+	NA	-0.00158481	0.373401	8	-877.749	1771.51	45.1733	9.33e-12
755	-9.00499	+	NA	1.22481	NA	NA	0.728597	3.11835	+	-0.117447	NA	0.409742	8	-877.767	1771.55	45.209	9.17e-12
628	-9.97421	+	0.539443	1.2314	NA	NA	0.752332	3.10204	+	NA	NA	0.36649	8	-877.769	1771.55	45.2131	9.15e-12
951	-9.46731	+	NA	1.23286	-0.822149	NA	0.818066	3.12297	NA	-0.0767137	-0.00110617	0.398848	9	-876.849	1771.71	45.3756	8.43e-12
567	-9.61036	+	NA	1.22667	-0.721803	NA	0.737107	3.12821	NA	NA	NA	0.318005	7	-878.861	1771.73	45.3942	8.35e-12
375	-9.73887	+	NA	1.25478	-0.826713	NA	0.823588	3.13147	+	NA	-0.00154377	NA	8	-877.896	1771.8	45.4669	8.06e-12
500	-9.72949	+	0.472879	1.258	NA	NA	0.815365	3.10766	+	-0.0515931	-0.00113306	NA	9	-876.896	1771.81	45.4691	8.05e-12
499	-9.3363	+	NA	1.25213	NA	NA	0.781963	3.12116	+	-0.0657731	-0.00104954	NA	8	-878.001	1772.01	45.6767	7.25e-12
120	-9.83883	+	0.507174	1.2513	-0.719379	NA	0.765399	3.12238	+	NA	NA	NA	8	-878.029	1772.07	45.7323	7.06e-12
888	-10.1691	+	0.511534	1.24109	-0.738864	NA	0.857977	3.10778	+	NA	-0.00161392	0.390342	10	-876.031	1772.08	45.7432	7.02e-12
247	-8.93743	+	NA	1.24797	-0.816214	NA	0.745556	3.13917	+	-0.10708	NA	NA	8	-878.077	1772.17	45.8278	6.73e-12
1012	-9.77661	+	0.490323	1.23652	NA	NA	0.818542	3.09858	+	-0.0632546	-0.00115422	0.435799	10	-876.076	1772.17	45.8329	6.71e-12
248	-9.28541	+	0.446659	1.25292	-0.774777	NA	0.772226	3.12477	+	-0.096468	NA	NA	9	-877.085	1772.18	45.8469	6.66e-12
627	-9.63401	+	NA	1.22508	NA	NA	0.720331	3.11753	+	NA	NA	0.332689	7	-879.202	1772.41	46.075	5.94e-12
1011	-9.36769	+	NA	1.23057	NA	NA	0.783858	3.11344	+	-0.0773535	-0.00106585	0.413221	9	-877.256	1772.53	46.1903	5.61e-12
119	-9.52109	+	NA	1.24476	-0.759074	NA	0.735682	3.13711	+	NA	NA	NA	7	-879.311	1772.63	46.293	5.33e-12
887	-9.83857	+	NA	1.23563	-0.783023	NA	0.828064	3.12318	+	NA	-0.0016233	0.356984	9	-877.331	1772.68	46.3401	5.21e-12
760	-9.32996	+	0.464169	1.23164	-0.720976	NA	0.773647	3.11417	+	-0.108342	NA	0.416547	10	-876.335	1772.69	46.3511	5.18e-12
759	-8.96744	+	NA	1.22676	-0.767174	NA	0.746015	3.13002	+	-0.118697	NA	0.394079	9	-877.399	1772.81	46.475	4.87e-12
504	-9.69714	+	0.459321	1.25935	-0.805747	NA	0.835216	3.11974	+	-0.051935	-0.00117553	NA	10	-876.482	1772.98	46.6453	4.47e-12
632	-9.94249	+	0.528264	1.23257	-0.674275	NA	0.767151	3.11192	+	NA	NA	0.352372	9	-877.484	1772.98	46.6454	4.47e-12
503	-9.31158	+	NA	1.2539	-0.845288	NA	0.803438	3.13406	+	-0.0658146	-0.00109525	NA	9	-877.529	1773.07	46.7351	4.27e-12
1016	-9.74641	+	0.47723	1.23833	-0.75192	NA	0.837198	3.10996	+	-0.0631688	-0.00119284	0.419739	11	-875.721	1773.46	47.1267	3.51e-12
1015	-9.34478	+	NA	1.23291	-0.796204	NA	0.80425	3.12568	+	-0.0769506	-0.00110795	0.396399	10	-876.843	1773.7	47.3663	3.12e-12
631	-9.6053	+	NA	1.22668	-0.720823	NA	0.736531	3.1283	+	NA	NA	0.317905	8	-878.861	1773.73	47.3968	3.07e-12
267	-6.65244	+	NA	0.658863	NA	+	NA	NA	NA	NA	0.00183878	NA	5	-882.305	1774.62	48.2782	1.98e-12
395	-5.9785	+	NA	0.658373	NA	+	NA	NA	NA	-0.137659	0.00265026	NA	6	-881.377	1774.76	48.4241	1.84e-12
11	-6.54897	+	NA	0.665217	NA	+	NA	NA	NA	NA	NA	NA	4	-883.569	1775.14	48.8043	1.52e-12
271	-6.2458	+	NA	0.658793	-1.24926	+	NA	NA	NA	NA	0.00170219	NA	6	-881.632	1775.27	48.9333	1.42e-12
15	-6.09577	+	NA	0.664626	-1.41999	+	NA	NA	NA	NA	NA	NA	5	-882.707	1775.42	49.0824	1.32e-12
907	-5.9343	+	NA	0.646064	NA	+	NA	NA	NA	-0.146845	0.00256901	0.402328	7	-880.713	1775.43	49.0972	1.31e-12
399	-5.60211	+	NA	0.658489	-1.20673	+	NA	NA	NA	-0.134205	0.00249788	NA	7	-880.748	1775.51	49.1678	1.27e-12
779	-6.65725	+	NA	0.647759	NA	+	NA	NA	NA	NA	0.00172214	0.35838	6	-881.773	1775.55	49.2162	1.24e-12
268	-6.7105	+	0.323116	0.667016	NA	+	NA	NA	NA	NA	0.00187202	NA	6	-881.814	1775.63	49.2967	1.19e-12
523	-6.55598	+	NA	0.652895	NA	+	NA	NA	NA	NA	NA	0.408111	5	-882.882	1775.77	49.4305	1.11e-12
396	-6.07062	+	0.278036	0.665357	NA	+	NA	NA	NA	-0.129774	0.00263532	NA	7	-881.014	1776.04	49.7008	9.7e-13
12	-6.60452	+	0.316008	0.673186	NA	+	NA	NA	NA	NA	NA	NA	5	-883.098	1776.2	49.8636	8.94e-13
527	-6.13056	+	NA	0.65295	-1.34053	+	NA	NA	NA	NA	NA	0.38101	6	-882.107	1776.22	49.8837	8.85e-13
911	-5.58386	+	NA	0.646698	-1.13639	+	NA	NA	NA	-0.143233	0.00243265	0.381294	8	-880.15	1776.31	49.9753	8.46e-13
783	-6.2709	+	NA	0.648218	-1.19222	+	NA	NA	NA	NA	0.00160038	0.337897	7	-881.159	1776.33	49.9888	8.4e-13
272	-6.31319	+	0.306109	0.666457	-1.21608	+	NA	NA	NA	NA	0.00173853	NA	7	-881.189	1776.39	50.0495	8.15e-13
780	-6.71756	+	0.336708	0.656514	NA	+	NA	NA	NA	NA	0.00175176	0.372541	7	-881.242	1776.49	50.1556	7.73e-13
16	-6.15872	+	0.297586	0.672072	-1.39175	+	NA	NA	NA	NA	NA	NA	6	-882.288	1776.58	50.2449	7.39e-13
908	-6.02909	+	0.288675	0.653683	NA	+	NA	NA	NA	-0.138867	0.00255187	0.411149	8	-880.323	1776.66	50.3207	7.11e-13
524	-6.61399	+	0.331366	0.661599	NA	+	NA	NA	NA	NA	NA	0.422226	6	-882.366	1776.74	50.4017	6.83e-13
400	-5.69806	+	0.262239	0.665009	-1.1811	+	NA	NA	NA	-0.126837	0.00248755	NA	8	-880.424	1776.86	50.5226	6.43e-13
139	-6.33854	+	NA	0.665907	NA	+	NA	NA	NA	-0.0402203	NA	NA	5	-883.471	1776.95	50.6091	6.16e-13
143	-5.8692	+	NA	0.66542	-1.43117	+	NA	NA	NA	-0.0425679	NA	NA	6	-882.597	1777.2	50.8629	5.43e-13
528	-6.19754	+	0.313028	0.661052	-1.3076	+	NA	NA	NA	NA	NA	0.395307	7	-881.645	1777.3	50.9623	5.16e-13
784	-6.34194	+	0.319826	0.656414	-1.155	+	NA	NA	NA	NA	0.00163354	0.352245	8	-880.677	1777.37	51.0292	4.99e-13
651	-6.27575	+	NA	0.653288	NA	+	NA	NA	NA	-0.0531103	NA	0.433227	6	-882.709	1777.43	51.0875	4.85e-13
912	-5.6833	+	0.273347	0.653799	-1.1083	+	NA	NA	NA	-0.135778	0.00242046	0.390463	9	-879.8	1777.62	51.2774	4.41e-13
265	-6.71816	+	NA	NA	NA	+	NA	NA	NA	NA	0.00189158	NA	4	-884.843	1777.69	51.3513	4.25e-13
393	-6.03372	+	NA	NA	NA	+	NA	NA	NA	-0.139682	0.00271489	NA	5	-883.91	1777.83	51.4884	3.97e-13
655	-5.84029	+	NA	0.653412	-1.34764	+	NA	NA	NA	-0.0545993	NA	0.406435	7	-881.925	1777.86	51.5215	3.9e-13
140	-6.43461	+	0.304521	0.673414	NA	+	NA	NA	NA	-0.0322891	NA	NA	6	-883.037	1778.08	51.7426	3.49e-13
9	-6.61356	+	NA	NA	NA	+	NA	NA	NA	NA	NA	NA	3	-886.145	1778.29	51.9541	3.14e-13
905	-5.9854	+	NA	NA	NA	+	NA	NA	NA	-0.149396	0.00262918	0.425381	6	-883.166	1778.34	52.0012	3.07e-13
269	-6.30673	+	NA	NA	-1.2634	+	NA	NA	NA	NA	0.0017534	NA	5	-884.17	1778.34	52.0072	3.06e-13
144	-5.97026	+	0.284912	0.672368	-1.40248	+	NA	NA	NA	-0.0350699	NA	NA	7	-882.215	1778.44	52.1016	2.92e-13
777	-6.7219	+	NA	NA	NA	+	NA	NA	NA	NA	0.00176795	0.381579	5	-884.238	1778.48	52.1443	2.86e-13
652	-6.37418	+	0.315429	0.66152	NA	+	NA	NA	NA	-0.0451907	NA	0.442451	7	-882.245	1778.5	52.1617	2.83e-13
13	-6.15364	+	NA	NA	-1.44005	+	NA	NA	NA	NA	NA	NA	4	-885.281	1778.56	52.227	2.74e-13
397	-5.6541	+	NA	NA	-1.2179	+	NA	NA	NA	-0.136093	0.00255985	NA	6	-883.283	1778.57	52.2357	2.73e-13
521	-6.6193	+	NA	NA	NA	+	NA	NA	NA	NA	NA	0.430931	4	-885.377	1778.76	52.4202	2.49e-13
266	-6.77366	+	0.303522	NA	NA	+	NA	NA	NA	NA	0.00192344	NA	5	-884.409	1778.82	52.4852	2.41e-13
656	-5.94467	+	0.296276	0.661013	-1.31604	+	NA	NA	NA	-0.0471045	NA	0.416022	8	-881.514	1779.04	52.702	2.16e-13
394	-6.12043	+	0.258424	NA	NA	+	NA	NA	NA	-0.132331	0.00270106	NA	6	-883.597	1779.2	52.8636	2e-13
525	-6.18916	+	NA	NA	-1.3553	+	NA	NA	NA	NA	NA	0.404163	5	-884.604	1779.21	52.8762	1.98e-13
909	-5.63331	+	NA	NA	-1.14282	+	NA	NA	NA	-0.145688	0.00249121	0.404626	7	-882.609	1779.23	52.8893	1.97e-13
781	-6.33247	+	NA	NA	-1.20202	+	NA	NA	NA	NA	0.00164504	0.361357	6	-883.627	1779.26	52.9243	1.94e-13
10	-6.66662	+	0.296375	NA	NA	+	NA	NA	NA	NA	NA	NA	4	-885.73	1779.46	53.1267	1.75e-13
778	-6.77949	+	0.316191	NA	NA	+	NA	NA	NA	NA	0.00179691	0.393466	6	-883.77	1779.55	53.2089	1.68e-13
270	-6.37074	+	0.28675	NA	-1.23247	+	NA	NA	NA	NA	0.00178792	NA	6	-883.781	1779.57	53.2317	1.66e-13
906	-6.07456	+	0.267819	NA	NA	+	NA	NA	NA	-0.141935	0.00261405	0.432404	7	-882.831	1779.67	53.3329	1.58e-13
14	-6.21334	+	0.278207	NA	-1.41376	+	NA	NA	NA	NA	NA	NA	5	-884.914	1779.83	53.4952	1.45e-13
522	-6.67458	+	0.310552	NA	NA	+	NA	NA	NA	NA	NA	0.442757	5	-884.925	1779.85	53.5165	1.44e-13
398	-5.74387	+	0.242896	NA	-1.19446	+	NA	NA	NA	-0.129239	0.00255076	NA	7	-883.005	1780.02	53.6822	1.32e-13
137	-6.40428	+	NA	NA	NA	+	NA	NA	NA	-0.040028	NA	NA	4	-886.05	1780.1	53.7659	1.27e-13
141	-5.92874	+	NA	NA	-1.45042	+	NA	NA	NA	-0.0423118	NA	NA	5	-885.174	1780.35	54.0159	1.12e-13
526	-6.25245	+	0.292619	NA	-1.325	+	NA	NA	NA	NA	NA	0.416173	6	-884.201	1780.41	54.0709	1.09e-13
649	-6.33667	+	NA	NA	NA	+	NA	NA	NA	-0.0535598	NA	0.455585	5	-885.206	1780.42	54.0801	1.09e-13
782	-6.39977	+	0.299676	NA	-1.16749	+	NA	NA	NA	NA	0.00167713	0.373437	7	-883.205	1780.42	54.0816	1.09e-13
910	-5.72628	+	0.252896	NA	-1.11739	+	NA	NA	NA	-0.138725	0.00248066	0.41199	8	-882.309	1780.63	54.292	9.77e-14
653	-5.89691	+	NA	NA	-1.36166	+	NA	NA	NA	-0.0549996	NA	0.429108	6	-884.424	1780.86	54.5178	8.72e-14
138	-6.49538	+	0.28505	NA	NA	+	NA	NA	NA	-0.0325515	NA	NA	5	-885.67	1781.34	55.0067	6.83e-14
650	-6.42998	+	0.294548	NA	NA	+	NA	NA	NA	-0.0460707	NA	0.462923	6	-884.802	1781.61	55.2728	5.98e-14
142	-6.02402	+	0.26574	NA	-1.42391	+	NA	NA	NA	-0.0352694	NA	NA	6	-884.842	1781.69	55.3536	5.74e-14
654	-5.99517	+	0.275834	NA	-1.33276	+	NA	NA	NA	-0.0479378	NA	0.436813	7	-884.068	1782.15	55.8075	4.58e-14
818	-10.425	+	0.514403	NA	NA	NA	0.876259	2.92595	NA	NA	-0.00156229	0.477765	7	-885.785	1785.58	59.2421	8.22e-15
306	-10.4272	+	0.49503	NA	NA	NA	0.883843	2.93195	NA	NA	-0.00145188	NA	6	-886.803	1785.61	59.2749	8.09e-15
100	-4.53069	+	0.450493	1.25406	NA	NA	NA	3.16251	+	NA	NA	NA	6	-886.827	1785.66	59.3235	7.89e-15
99	-4.44221	+	NA	1.24872	NA	NA	NA	3.17964	+	NA	NA	NA	5	-887.841	1785.69	59.349	7.79e-15
50	-10.104	+	0.507038	NA	NA	NA	0.789329	2.94279	NA	NA	NA	NA	5	-887.94	1785.89	59.5483	7.05e-15
690	-9.5999	+	0.467335	NA	NA	NA	0.79667	2.93449	NA	-0.109801	NA	0.505088	7	-885.941	1785.89	59.5539	7.03e-15
689	-9.40859	+	NA	NA	NA	NA	0.786084	2.9468	NA	-0.11976	NA	0.490902	6	-887.031	1786.07	59.7325	6.43e-15
305	-10.2815	+	NA	NA	NA	NA	0.872052	2.94252	NA	NA	-0.00146091	NA	5	-888.041	1786.09	59.7495	6.38e-15
178	-9.69693	+	0.454576	NA	NA	NA	0.809558	2.94091	NA	-0.0948552	NA	NA	6	-887.064	1786.14	59.7983	6.22e-15
562	-10.0884	+	0.525681	NA	NA	NA	0.777018	2.93573	NA	NA	NA	0.439377	6	-887.075	1786.16	59.8196	6.16e-15
177	-9.50985	+	NA	NA	NA	NA	0.799194	2.95182	NA	-0.105003	NA	NA	5	-888.102	1786.21	59.8721	6e-15
817	-10.2749	+	NA	NA	NA	NA	0.864493	2.93786	NA	NA	-0.00156555	0.453999	6	-887.112	1786.23	59.8928	5.94e-15
612	-4.62471	+	0.472519	1.23336	NA	NA	NA	3.15181	+	NA	NA	0.405735	7	-886.123	1786.25	59.917	5.87e-15
227	-3.91589	+	NA	1.25062	NA	NA	NA	3.18248	+	-0.0879721	NA	NA	6	-887.152	1786.31	59.9739	5.7e-15
611	-4.5254	+	NA	1.22829	NA	NA	NA	3.17051	+	NA	NA	0.37621	6	-887.228	1786.46	60.1251	5.29e-15
49	-9.95694	+	NA	NA	NA	NA	0.777245	2.95445	NA	NA	NA	NA	4	-889.232	1786.47	60.1303	5.27e-15
228	-4.05332	+	0.411335	1.25496	NA	NA	NA	3.1654	+	-0.078472	NA	NA	7	-886.311	1786.63	60.2942	4.86e-15
739	-3.94151	+	NA	1.22833	NA	NA	NA	3.17391	+	-0.0994122	NA	0.428119	7	-886.371	1786.75	60.4139	4.58e-15
310	-10.1304	+	0.475643	NA	-0.794894	NA	0.874841	2.94856	NA	NA	-0.00150776	NA	7	-886.38	1786.77	60.4316	4.54e-15
946	-10.0194	+	0.480535	NA	NA	NA	0.858689	2.9277	NA	-0.0680415	-0.00110515	0.509062	8	-885.443	1786.9	60.5605	4.25e-15
822	-10.1616	+	0.496404	NA	-0.716029	NA	0.868975	2.94087	NA	NA	-0.00160804	0.458039	8	-885.446	1786.9	60.566	4.24e-15
561	-9.93845	+	NA	NA	NA	NA	0.765372	2.94882	NA	NA	NA	0.414708	5	-888.452	1786.91	60.5722	4.23e-15
740	-4.08633	+	0.429362	1.23273	NA	NA	NA	3.15532	+	-0.0900177	NA	0.44862	8	-885.461	1786.93	60.5972	4.17e-15
309	-9.96122	+	NA	NA	-0.858966	NA	0.862026	2.96102	NA	NA	-0.00151999	NA	6	-887.526	1787.06	60.7222	3.92e-15
434	-10.1115	+	0.467519	NA	NA	NA	0.870965	2.93328	NA	-0.0538614	-0.00108389	NA	7	-886.583	1787.18	60.8379	3.7e-15
945	-9.79077	+	NA	NA	NA	NA	0.842989	2.93997	NA	-0.0816261	-0.00101537	0.49431	7	-886.593	1787.19	60.8568	3.67e-15
54	-9.8277	+	0.490728	NA	-0.709578	NA	0.778051	2.95733	NA	NA	NA	NA	6	-887.611	1787.23	60.8924	3.6e-15
181	-9.17292	+	NA	NA	-0.851133	NA	0.786641	2.96999	NA	-0.107718	NA	NA	6	-887.633	1787.27	60.9357	3.52e-15
694	-9.32646	+	0.449671	NA	-0.700326	NA	0.787391	2.94897	NA	-0.111856	NA	0.486613	8	-885.639	1787.29	60.9529	3.49e-15
693	-9.11145	+	NA	NA	-0.772423	NA	0.775844	2.96319	NA	-0.121646	NA	0.470471	7	-886.65	1787.31	60.9715	3.46e-15
433	-9.88812	+	NA	NA	NA	NA	0.855619	2.94421	NA	-0.0675041	-0.000997658	NA	6	-887.678	1787.36	61.0245	3.37e-15
182	-9.38242	+	0.434971	NA	-0.783452	NA	0.798038	2.95717	NA	-0.0977491	NA	NA	7	-886.681	1787.37	61.0341	3.36e-15
821	-9.98562	+	NA	NA	-0.787258	NA	0.856177	2.95474	NA	NA	-0.00161471	0.4325	7	-886.684	1787.38	61.0389	3.35e-15
103	-4.36601	+	NA	1.24901	-0.392529	NA	NA	3.18474	+	NA	NA	NA	6	-887.751	1787.51	61.1712	3.13e-15
104	-4.4616	+	0.445718	1.25421	-0.350708	NA	NA	3.16691	+	NA	NA	NA	7	-886.758	1787.53	61.1888	3.11e-15
370	-10.127	+	0.487277	NA	NA	NA	0.851639	2.93834	+	NA	-0.00146565	NA	7	-886.771	1787.55	61.2137	3.07e-15
882	-10.2624	+	0.510114	NA	NA	NA	0.858908	2.92942	+	NA	-0.00156908	0.473933	8	-885.776	1787.56	61.2263	3.05e-15
566	-9.8442	+	0.510595	NA	-0.637125	NA	0.767811	2.94863	NA	NA	NA	0.422128	7	-886.815	1787.64	61.3009	2.94e-15
53	-9.65551	+	NA	NA	-0.77516	NA	0.764699	2.97082	NA	NA	NA	NA	5	-888.824	1787.65	61.3156	2.91e-15
356	-4.51994	+	0.449924	1.25424	NA	NA	NA	3.16258	+	NA	-4.22e-05	NA	7	-886.826	1787.66	61.3242	2.9e-15
355	-4.41633	+	NA	1.2492	NA	NA	NA	3.1798	+	NA	-0.000102491	NA	6	-887.836	1787.68	61.341	2.88e-15
114	-9.91551	+	0.502537	NA	NA	NA	0.768801	2.9466	+	NA	NA	NA	6	-887.929	1787.86	61.527	2.62e-15
754	-9.41232	+	0.462348	NA	NA	NA	0.776811	2.9384	+	-0.110489	NA	0.501099	8	-885.93	1787.87	61.5335	2.61e-15
369	-9.82089	+	NA	NA	NA	NA	0.822461	2.95286	+	NA	-0.00148139	NA	6	-887.963	1787.93	61.5947	2.54e-15
753	-9.05525	+	NA	NA	NA	NA	0.748379	2.9546	+	-0.120788	NA	0.483265	7	-886.988	1787.98	61.6471	2.47e-15
241	-9.02592	+	NA	NA	NA	NA	0.747409	2.96243	+	-0.106692	NA	NA	6	-888.021	1788.05	61.711	2.39e-15
483	-3.9397	+	NA	1.24827	NA	NA	NA	3.18239	+	-0.10838	0.000578961	NA	7	-887.024	1788.06	61.7191	2.38e-15
242	-9.37026	+	0.445978	NA	NA	NA	0.774878	2.94766	+	-0.0962354	NA	NA	7	-887.03	1788.07	61.731	2.37e-15
231	-3.84058	+	NA	1.25096	-0.38786	NA	NA	3.18765	+	-0.0879448	NA	NA	7	-887.065	1788.14	61.8018	2.29e-15
881	-9.93807	+	NA	NA	NA	NA	0.828413	2.9454	+	NA	-0.00157901	0.44615	7	-887.07	1788.15	61.8119	2.27e-15
616	-4.56289	+	0.468126	1.23366	-0.308583	NA	NA	3.15567	+	NA	NA	0.401205	8	-886.07	1788.15	61.8153	2.27e-15
626	-10.0336	+	0.524349	NA	NA	NA	0.771096	2.93683	+	NA	NA	0.438131	7	-887.074	1788.16	61.82	2.27e-15
950	-9.74836	+	0.462033	NA	-0.735351	NA	0.851333	2.94299	NA	-0.0685172	-0.00114884	0.489065	9	-885.098	1788.21	61.8729	2.21e-15
565	-9.66649	+	NA	NA	-0.71001	NA	0.754864	2.96363	NA	NA	NA	0.39563	6	-888.116	1788.24	61.9008	2.18e-15
868	-4.59344	+	0.470964	1.23381	NA	NA	NA	3.15209	+	NA	-0.000125085	0.408439	8	-886.116	1788.24	61.9058	2.17e-15
438	-9.80076	+	0.447111	NA	-0.818399	NA	0.861586	2.95033	NA	-0.0550023	-0.00113354	NA	8	-886.149	1788.31	61.9732	2.1e-15
437	-9.55779	+	NA	NA	-0.884918	NA	0.845536	2.96311	NA	-0.0681563	-0.00105422	NA	7	-887.153	1788.32	61.9776	2.09e-15
615	-4.45516	+	NA	1.22878	-0.356226	NA	NA	3.17513	+	NA	NA	0.371131	7	-887.155	1788.32	61.9814	2.09e-15
949	-9.49868	+	NA	NA	-0.806197	NA	0.834968	2.95712	NA	-0.0816343	-0.00106566	0.472375	8	-886.162	1788.34	61.9989	2.07e-15
113	-9.60279	+	NA	NA	NA	NA	0.73855	2.962	+	NA	NA	NA	5	-889.189	1788.38	62.046	2.02e-15
484	-4.07678	+	0.409081	1.2527	NA	NA	NA	3.16533	+	-0.098567	0.000572082	NA	8	-886.192	1788.4	62.0582	2.01e-15
867	-4.48053	+	NA	1.22901	NA	NA	NA	3.1709	+	NA	-0.000181493	0.380361	7	-887.212	1788.43	62.0966	1.97e-15
232	-3.98372	+	0.406626	1.25516	-0.350298	NA	NA	3.16992	+	-0.0785468	NA	NA	8	-886.243	1788.5	62.1609	1.91e-15
995	-3.9636	+	NA	1.2261	NA	NA	NA	3.1735	+	-0.118963	0.000555329	0.424901	8	-886.254	1788.52	62.1816	1.89e-15
743	-3.87486	+	NA	1.22884	-0.34199	NA	NA	3.17845	+	-0.0992339	NA	0.422744	8	-886.304	1788.62	62.2823	1.8e-15
996	-4.10785	+	0.427075	1.23056	NA	NA	NA	3.15496	+	-0.109195	0.000546177	0.445369	9	-885.354	1788.72	62.3847	1.71e-15
374	-10.0982	+	0.474892	NA	-0.78837	NA	0.871201	2.94918	+	NA	-0.00150888	NA	8	-886.379	1788.77	62.4335	1.67e-15
744	-4.02643	+	0.425206	1.23306	-0.30018	NA	NA	3.15917	+	-0.0899478	NA	0.443876	9	-885.412	1788.84	62.5015	1.61e-15
1010	-9.80288	+	0.474598	NA	NA	NA	0.835842	2.93235	+	-0.0687201	-0.00110935	0.504327	9	-885.427	1788.87	62.5316	1.59e-15
625	-9.70404	+	NA	NA	NA	NA	0.739925	2.95376	+	NA	NA	0.409406	6	-888.434	1788.87	62.5371	1.58e-15
886	-10.2337	+	0.498086	NA	-0.730102	NA	0.877071	2.9395	+	NA	-0.00160577	0.459473	9	-885.444	1788.9	62.565	1.56e-15
373	-9.79694	+	NA	NA	-0.824763	NA	0.843362	2.96434	+	NA	-0.00152553	NA	7	-887.515	1789.04	62.7026	1.46e-15
1009	-9.40734	+	NA	NA	NA	NA	0.802204	2.94862	+	-0.0824111	-0.00102514	0.485777	8	-886.539	1789.09	62.7521	1.42e-15
498	-9.75573	+	0.457867	NA	NA	NA	0.833301	2.94079	+	-0.0551627	-0.00109095	NA	8	-886.54	1789.09	62.7549	1.42e-15
497	-9.37447	+	NA	NA	NA	NA	0.800828	2.95571	+	-0.0688573	-0.00101089	NA	7	-887.582	1789.17	62.8358	1.36e-15
118	-9.88332	+	0.491906	NA	-0.720437	NA	0.784397	2.95633	+	NA	NA	NA	7	-887.61	1789.23	62.8925	1.33e-15
245	-8.9854	+	NA	NA	-0.811082	NA	0.765448	2.97368	+	-0.108275	NA	NA	7	-887.619	1789.25	62.9108	1.31e-15
758	-9.37032	+	0.450706	NA	-0.709114	NA	0.792287	2.94815	+	-0.111715	NA	0.487394	9	-885.638	1789.29	62.9545	1.28e-15
757	-9.01848	+	NA	NA	-0.752918	NA	0.765368	2.96503	+	-0.121876	NA	0.468794	8	-886.646	1789.31	62.9675	1.28e-15
246	-9.32378	+	0.433596	NA	-0.771486	NA	0.791473	2.95826	+	-0.0979662	NA	NA	8	-886.68	1789.37	63.0343	1.23e-15
885	-9.91369	+	NA	NA	-0.772738	NA	0.848051	2.95619	+	NA	-0.00161688	0.431088	8	-886.681	1789.38	63.0375	1.23e-15
359	-4.33922	+	NA	1.24951	-0.392995	NA	NA	3.18493	+	NA	-0.000105826	NA	7	-887.746	1789.5	63.1629	1.16e-15
360	-4.44985	+	0.445097	1.25441	-0.35101	NA	NA	3.167	+	NA	-4.59e-05	NA	8	-886.758	1789.53	63.1896	1.14e-15
630	-10.0022	+	0.513991	NA	-0.666956	NA	0.78571	2.9458	+	NA	NA	0.425156	8	-886.806	1789.62	63.2861	1.09e-15
117	-9.57423	+	NA	NA	-0.758839	NA	0.75539	2.97237	+	NA	NA	NA	6	-888.822	1789.65	63.3127	1.07e-15
487	-3.86513	+	NA	1.24864	-0.38374	NA	NA	3.18751	+	-0.10815	0.000574104	NA	8	-886.939	1789.89	63.5524	9.53e-16
872	-4.531	+	0.466543	1.23412	-0.309003	NA	NA	3.15596	+	NA	-0.000127273	0.40393	9	-886.063	1790.14	63.8039	8.4e-16
1014	-9.77426	+	0.462661	NA	-0.740508	NA	0.85422	2.94251	+	-0.0684459	-0.00114847	0.489548	10	-885.097	1790.21	63.8757	8.1e-16
629	-9.67546	+	NA	NA	-0.711761	NA	0.755884	2.96346	+	NA	NA	0.395802	7	-888.116	1790.24	63.9031	7.99e-16
488	-4.00781	+	0.404435	1.25292	-0.345977	NA	NA	3.16981	+	-0.0984767	0.000567678	NA	9	-886.126	1790.27	63.9296	7.89e-16
501	-9.34991	+	NA	NA	-0.840586	NA	0.822077	2.9673	+	-0.0686822	-0.00105734	NA	8	-887.136	1790.28	63.9458	7.83e-16
871	-4.40979	+	NA	1.2295	-0.356428	NA	NA	3.17554	+	NA	-0.000183345	0.375285	8	-887.139	1790.29	63.9527	7.8e-16
502	-9.72411	+	0.445258	NA	-0.802865	NA	0.853021	2.95178	+	-0.0552789	-0.00113416	NA	9	-886.147	1790.31	63.9719	7.72e-16
1013	-9.38518	+	NA	NA	-0.78243	NA	0.822205	2.95943	+	-0.0818607	-0.00106751	0.470273	9	-886.157	1790.33	63.9916	7.65e-16
999	-3.89772	+	NA	1.22662	-0.338227	NA	NA	3.178	+	-0.118599	0.000551379	0.419647	9	-886.188	1790.39	64.0543	7.41e-16
1000	-4.04874	+	0.422966	1.23091	-0.296236	NA	NA	3.15877	+	-0.108977	0.000542682	0.440739	10	-885.306	1790.63	64.2927	6.58e-16
276	-9.67989	+	0.534561	1.14707	NA	NA	0.892966	NA	NA	NA	-0.00157117	NA	6	-893.261	1798.53	72.1923	1.27e-17
788	-9.68901	+	0.556765	1.12614	NA	NA	0.887206	NA	NA	NA	-0.00167086	0.442668	7	-892.398	1798.81	72.4682	1.1e-17
20	-9.34026	+	0.549084	1.13945	NA	NA	0.792402	NA	NA	NA	NA	NA	5	-894.567	1799.14	72.802	9.34e-18
148	-8.91893	+	0.496552	1.14077	NA	NA	0.812639	NA	NA	-0.097364	NA	NA	6	-893.663	1799.33	72.9951	8.48e-18
660	-8.84213	+	0.513222	1.11824	NA	NA	0.8022	NA	NA	-0.111111	NA	0.469022	7	-892.705	1799.42	73.0819	8.12e-18
275	-9.50592	+	NA	1.14092	NA	NA	0.878259	NA	NA	NA	-0.00157825	NA	5	-894.715	1799.44	73.0979	8.06e-18
532	-9.33739	+	0.570236	1.11916	NA	NA	0.782404	NA	NA	NA	NA	0.405365	6	-893.84	1799.69	73.3494	7.1e-18
147	-8.70147	+	NA	1.13541	NA	NA	0.799597	NA	NA	-0.108015	NA	NA	5	-894.909	1799.82	73.4856	6.64e-18
787	-9.50847	+	NA	1.12011	NA	NA	0.872467	NA	NA	NA	-0.00167037	0.410956	6	-893.963	1799.93	73.5951	6.28e-18
280	-9.43813	+	0.519542	1.14704	-0.66172	NA	0.886706	NA	NA	NA	-0.00161931	NA	7	-892.974	1799.96	73.6195	6.21e-18
659	-8.61921	+	NA	1.11273	NA	NA	0.788977	NA	NA	-0.121442	NA	0.447674	6	-894.029	1800.06	73.727	5.88e-18
404	-9.37876	+	0.509135	1.14605	NA	NA	0.88071	NA	NA	-0.0513798	-0.00122014	NA	7	-893.063	1800.14	73.798	5.68e-18
19	-9.16567	+	NA	1.13273	NA	NA	0.777646	NA	NA	NA	NA	NA	4	-896.092	1800.19	73.8493	5.53e-18
916	-9.30567	+	0.526011	1.12379	NA	NA	0.870745	NA	NA	-0.0645034	-0.00123719	0.471946	8	-892.094	1800.2	73.8632	5.49e-18
792	-9.47652	+	0.542864	1.12663	-0.589034	NA	0.882225	NA	NA	NA	-0.00171002	0.426698	8	-892.174	1800.36	74.0216	5.08e-18
340	-9.67555	+	0.534446	1.14706	NA	NA	0.892504	NA	+	NA	-0.00157136	NA	7	-893.261	1800.53	74.1946	4.66e-18
279	-9.24056	+	NA	1.14123	-0.72782	NA	0.871187	NA	NA	NA	-0.00163034	NA	6	-894.349	1800.71	74.3682	4.27e-18
24	-9.12104	+	0.536958	1.13916	-0.574671	NA	0.784258	NA	NA	NA	NA	NA	6	-894.357	1800.72	74.3845	4.23e-18
403	-9.12294	+	NA	1.14025	NA	NA	0.862311	NA	NA	-0.0657125	-0.00112738	NA	6	-894.37	1800.75	74.41	4.18e-18
852	-9.81295	+	0.559721	1.12624	NA	NA	0.90031	NA	+	NA	-0.00166558	0.445541	8	-892.393	1800.8	74.4602	4.08e-18
152	-8.66552	+	0.481765	1.14067	-0.642149	NA	0.804267	NA	NA	-0.0998012	NA	NA	7	-893.412	1800.83	74.4951	4.01e-18
531	-9.15808	+	NA	1.11277	NA	NA	0.768145	NA	NA	NA	NA	0.372406	5	-895.471	1800.95	74.6091	3.78e-18
804	-6.86912	+	0.563609	1.23	NA	NA	NA	3.08287	NA	NA	0.00166324	0.522889	7	-893.471	1800.95	74.6134	3.78e-18
915	-9.04284	+	NA	1.11781	NA	NA	0.851954	NA	NA	-0.0786832	-0.00113995	0.449993	7	-893.482	1800.97	74.6349	3.74e-18
664	-8.6248	+	0.500038	1.11865	-0.564714	NA	0.79555	NA	NA	-0.112817	NA	0.454419	8	-892.514	1801.04	74.7028	3.61e-18
84	-9.45628	+	0.551542	1.13965	NA	NA	0.804939	NA	+	NA	NA	NA	6	-894.563	1801.13	74.7952	3.45e-18
932	-6.22213	+	0.519151	1.22692	NA	NA	NA	3.08514	NA	-0.131003	0.0024195	0.558686	8	-892.578	1801.17	74.8303	3.39e-18
151	-8.42392	+	NA	1.13562	-0.712403	NA	0.79033	NA	NA	-0.110431	NA	NA	6	-894.586	1801.18	74.841	3.37e-18
548	-6.76991	+	0.55825	1.23532	NA	NA	NA	3.0762	NA	NA	NA	0.575731	6	-894.587	1801.18	74.8428	3.37e-18
292	-6.85333	+	0.541998	1.25431	NA	NA	NA	3.09311	NA	NA	0.00183491	NA	6	-894.609	1801.23	74.8882	3.29e-18
791	-9.26932	+	NA	1.12105	-0.663872	NA	0.86665	NA	NA	NA	-0.00171374	0.393055	7	-893.662	1801.33	74.9962	3.12e-18
212	-8.90303	+	0.496161	1.14073	NA	NA	0.810968	NA	+	-0.0974362	NA	NA	7	-893.663	1801.33	74.9973	3.12e-18
536	-9.14587	+	0.559042	1.1194	-0.508727	NA	0.775834	NA	NA	NA	NA	0.392142	7	-893.679	1801.37	75.0295	3.07e-18
724	-8.95522	+	0.515899	1.11835	NA	NA	0.814064	NA	+	-0.110678	NA	0.471405	8	-892.701	1801.41	75.0763	3e-18
339	-9.33865	+	NA	1.14071	NA	NA	0.860437	NA	+	NA	-0.0015861	NA	6	-894.705	1801.42	75.079	2.99e-18
408	-9.12487	+	0.493366	1.14611	-0.681378	NA	0.87412	NA	NA	-0.0524031	-0.00126253	NA	8	-892.767	1801.55	75.2094	2.8e-18
663	-8.37583	+	NA	1.11355	-0.641102	NA	0.781466	NA	NA	-0.123126	NA	0.431005	7	-893.771	1801.55	75.2133	2.8e-18
552	-6.35318	+	0.5364	1.23601	-1.31072	NA	NA	3.09395	NA	NA	NA	0.547836	7	-893.795	1801.6	75.2625	2.73e-18
23	-8.92085	+	NA	1.13267	-0.64254	NA	0.768391	NA	NA	NA	NA	NA	5	-895.817	1801.64	75.3012	2.68e-18
596	-9.57703	+	0.575471	1.11939	NA	NA	0.808143	NA	+	NA	NA	0.41066	7	-893.822	1801.65	75.3151	2.66e-18
808	-6.4902	+	0.543436	1.23106	-1.1667	NA	NA	3.0985	NA	NA	0.00154224	0.501883	8	-892.842	1801.7	75.3578	2.6e-18
420	-6.2651	+	0.501317	1.25275	NA	NA	NA	3.09525	NA	-0.119893	0.0025427	NA	7	-893.867	1801.74	75.4064	2.54e-18
920	-9.08656	+	0.511783	1.12437	-0.604191	NA	0.865676	NA	NA	-0.0649433	-0.00127422	0.45567	9	-891.866	1801.75	75.4093	2.54e-18
931	-6.05609	+	NA	1.22065	NA	NA	NA	3.10226	NA	-0.143772	0.0024468	0.538842	7	-893.881	1801.77	75.4331	2.51e-18
296	-6.44576	+	0.521434	1.25476	-1.24744	NA	NA	3.10949	NA	NA	0.00169527	NA	7	-893.893	1801.8	75.4574	2.48e-18
211	-8.52123	+	NA	1.13516	NA	NA	0.780517	NA	+	-0.108693	NA	NA	6	-894.898	1801.8	75.465	2.47e-18
344	-9.65406	+	0.5239	1.14744	-0.705305	NA	0.910937	NA	+	NA	-0.00161121	NA	8	-892.956	1801.92	75.5864	2.32e-18
851	-9.45292	+	NA	1.12009	NA	NA	0.866578	NA	+	NA	-0.00167273	0.40965	7	-893.962	1801.93	75.5952	2.31e-18
36	-6.75001	+	0.534346	1.26138	NA	NA	NA	3.08463	NA	NA	NA	NA	5	-895.965	1801.94	75.5982	2.31e-18
936	-5.86865	+	0.500261	1.22816	-1.13222	NA	NA	3.10074	NA	-0.128123	0.00228597	0.537253	9	-891.985	1801.99	75.6485	2.25e-18
407	-8.84784	+	NA	1.14069	-0.750087	NA	0.855137	NA	NA	-0.0664144	-0.00117627	NA	7	-893.997	1802	75.6649	2.23e-18
803	-6.76354	+	NA	1.22321	NA	NA	NA	3.10001	NA	NA	0.00161809	0.495717	6	-895.005	1802.02	75.6786	2.22e-18
723	-8.5565	+	NA	1.1127	NA	NA	0.782355	NA	+	-0.121641	NA	0.446331	7	-894.027	1802.06	75.7266	2.16e-18
291	-6.75237	+	NA	1.24784	NA	NA	NA	3.10875	NA	NA	0.00178209	NA	5	-896.039	1802.08	75.745	2.14e-18
40	-6.29484	+	0.512175	1.26133	-1.4212	NA	NA	3.1035	NA	NA	NA	NA	6	-895.047	1802.1	75.7641	2.12e-18
468	-9.32885	+	0.507924	1.14597	NA	NA	0.875479	NA	+	-0.0515724	-0.00122107	NA	8	-893.062	1802.14	75.799	2.09e-18
83	-9.11315	+	NA	1.13266	NA	NA	0.771958	NA	+	NA	NA	NA	5	-896.091	1802.19	75.849	2.04e-18
419	-6.10404	+	NA	1.247	NA	NA	NA	3.11096	NA	-0.132629	0.00256452	NA	6	-895.09	1802.19	75.8497	2.04e-18
547	-6.6673	+	NA	1.22846	NA	NA	NA	3.0934	NA	NA	NA	0.548304	5	-896.093	1802.19	75.8542	2.03e-18
980	-9.38465	+	0.52797	1.12386	NA	NA	0.878999	NA	+	-0.0642481	-0.0012356	0.473684	9	-892.092	1802.2	75.862	2.02e-18
856	-9.79089	+	0.549405	1.127	-0.650367	NA	0.917293	NA	+	NA	-0.00169934	0.432865	9	-892.136	1802.29	75.9501	1.94e-18
919	-8.80079	+	NA	1.11886	-0.678926	NA	0.846345	NA	NA	-0.0787948	-0.00118343	0.431626	8	-893.18	1802.37	76.0342	1.86e-18
424	-5.8786	+	0.481733	1.25339	-1.22454	NA	NA	3.11172	NA	-0.117044	0.00238848	NA	8	-893.181	1802.37	76.0356	1.85e-18
551	-6.23143	+	NA	1.22979	-1.37393	NA	NA	3.1125	NA	NA	NA	0.519827	6	-895.192	1802.39	76.0543	1.84e-18
935	-5.68829	+	NA	1.22247	-1.19204	NA	NA	3.11914	NA	-0.140197	0.00230254	0.516653	8	-893.199	1802.41	76.0724	1.82e-18
295	-6.32527	+	NA	1.24878	-1.30996	NA	NA	3.12643	NA	NA	0.00163497	NA	6	-895.221	1802.45	76.1119	1.79e-18
535	-8.93775	+	NA	1.11334	-0.58545	NA	0.760409	NA	NA	NA	NA	0.357277	6	-895.247	1802.5	76.163	1.74e-18
807	-6.36278	+	NA	1.22488	-1.23651	NA	NA	3.11703	NA	NA	0.00148901	0.474149	7	-894.273	1802.55	76.2172	1.69e-18
423	-5.70466	+	NA	1.2481	-1.2792	NA	NA	3.1286	NA	-0.129114	0.00240065	NA	7	-894.314	1802.64	76.2994	1.63e-18
88	-9.43145	+	0.542691	1.13972	-0.634896	NA	0.81943	NA	+	NA	NA	NA	7	-894.324	1802.66	76.3189	1.61e-18
39	-6.18073	+	NA	1.25547	-1.47574	NA	NA	3.12055	NA	NA	NA	NA	5	-896.332	1802.67	76.3317	1.6e-18
343	-9.3213	+	NA	1.14136	-0.74458	NA	0.880279	NA	+	NA	-0.00162741	NA	7	-894.347	1802.7	76.3652	1.57e-18
467	-8.9076	+	NA	1.13997	NA	NA	0.839597	NA	+	-0.0663375	-0.00113308	NA	7	-894.353	1802.72	76.3785	1.56e-18
35	-6.65232	+	NA	1.25502	NA	NA	NA	3.10044	NA	NA	NA	NA	4	-897.357	1802.72	76.3801	1.56e-18
97	-4.35475	+	NA	NA	NA	NA	NA	3.0114	+	NA	NA	NA	4	-897.368	1802.74	76.4022	1.54e-18
216	-8.86525	+	0.485838	1.14103	-0.682743	NA	0.826452	NA	+	-0.0990331	NA	NA	8	-893.397	1802.81	76.4694	1.49e-18
98	-4.44023	+	0.436743	NA	NA	NA	NA	2.99339	+	NA	NA	NA	5	-896.411	1802.83	76.4888	1.48e-18
610	-4.55038	+	0.45902	NA	NA	NA	NA	2.98312	+	NA	NA	0.476975	6	-895.423	1802.85	76.5147	1.46e-18
609	-4.45527	+	NA	NA	NA	NA	NA	3.00271	+	NA	NA	0.451986	5	-896.471	1802.95	76.6091	1.39e-18
595	-9.21236	+	NA	1.11279	NA	NA	0.773989	NA	+	NA	NA	0.373602	6	-895.47	1802.95	76.6092	1.39e-18
676	-6.54887	+	0.543703	1.2352	NA	NA	NA	3.07584	NA	-0.0417263	NA	0.595061	7	-894.473	1802.96	76.6183	1.39e-18
979	-8.94469	+	NA	1.11775	NA	NA	0.841621	NA	+	-0.078909	-0.00114242	0.447807	8	-893.478	1802.97	76.6306	1.38e-18
728	-8.92085	+	0.506149	1.11901	-0.623717	NA	0.828329	NA	+	-0.111813	NA	0.459596	9	-892.483	1802.98	76.6437	1.37e-18
215	-8.48794	+	NA	1.13573	-0.726002	NA	0.797501	NA	+	-0.110226	NA	NA	7	-894.584	1803.18	76.8402	1.24e-18
737	-3.854	+	NA	NA	NA	NA	NA	3.00587	+	-0.102174	NA	0.50175	6	-895.607	1803.22	76.8836	1.21e-18
600	-9.55231	+	0.566778	1.11984	-0.585078	NA	0.821586	NA	+	NA	NA	0.399656	8	-893.622	1803.26	76.9184	1.19e-18
855	-9.4345	+	NA	1.12119	-0.697121	NA	0.885154	NA	+	NA	-0.00170835	0.396258	8	-893.651	1803.31	76.9771	1.16e-18
680	-6.11686	+	0.520836	1.23594	-1.32191	NA	NA	3.09385	NA	-0.0439572	NA	0.56786	8	-893.669	1803.35	77.0129	1.14e-18
225	-3.82207	+	NA	NA	NA	NA	NA	3.01361	+	-0.0889962	NA	NA	5	-896.696	1803.4	77.0601	1.11e-18
738	-3.99376	+	0.41628	NA	NA	NA	NA	2.9866	+	-0.0929846	NA	0.518623	7	-894.747	1803.5	77.1665	1.05e-18
472	-9.30433	+	0.497194	1.14645	-0.717795	NA	0.894016	NA	+	-0.0517501	-0.00126057	NA	9	-892.756	1803.53	77.1886	1.04e-18
727	-8.52606	+	NA	1.11369	-0.672448	NA	0.798239	NA	+	-0.122718	NA	0.433672	8	-893.762	1803.54	77.1987	1.04e-18
87	-9.09125	+	NA	1.13294	-0.676493	NA	0.787757	NA	+	NA	NA	NA	6	-895.806	1803.62	77.2816	9.95e-19
984	-9.3623	+	0.517726	1.12472	-0.658899	NA	0.89613	NA	+	-0.0640618	-0.00127101	0.460663	10	-891.838	1803.69	77.3567	9.58e-19
675	-6.38255	+	NA	1.22866	NA	NA	NA	3.09282	NA	-0.0538897	NA	0.575051	6	-895.896	1803.8	77.4618	9.09e-19
226	-3.95509	+	0.39898	NA	NA	NA	NA	2.99589	+	-0.0797911	NA	NA	6	-895.901	1803.81	77.4711	9.05e-19
164	-6.61726	+	0.525475	1.26164	NA	NA	NA	3.08431	NA	-0.0253224	NA	NA	6	-895.924	1803.86	77.5177	8.84e-19
679	-5.93406	+	NA	1.23005	-1.38497	NA	NA	3.11223	NA	-0.0557201	NA	0.54711	7	-894.98	1803.97	77.6325	8.35e-19
168	-6.14194	+	0.501977	1.26167	-1.43237	NA	NA	3.10332	NA	-0.0284461	NA	NA	7	-894.995	1804	77.6613	8.23e-19
471	-8.88888	+	NA	1.14075	-0.758748	NA	0.859721	NA	+	-0.066302	-0.00117559	NA	8	-893.996	1804	77.6663	8.21e-19
983	-8.9277	+	NA	1.11898	-0.705233	NA	0.860478	NA	+	-0.0785108	-0.00118124	0.433961	9	-893.173	1804.36	78.0244	6.86e-19
167	-5.96511	+	NA	1.25628	-1.48961	NA	NA	3.12019	NA	-0.0403916	NA	NA	6	-896.221	1804.45	78.112	6.57e-19
599	-9.18992	+	NA	1.11353	-0.634237	NA	0.788892	NA	+	NA	NA	0.361903	7	-895.224	1804.46	78.1191	6.54e-19
163	-6.45525	+	NA	1.2557	NA	NA	NA	3.09985	NA	-0.03768	NA	NA	5	-897.262	1804.53	78.1913	6.31e-19
101	-4.27866	+	NA	NA	-0.391522	NA	NA	3.01607	+	NA	NA	NA	5	-897.283	1804.57	78.2327	6.18e-19
102	-4.371	+	0.432234	NA	-0.351301	NA	NA	2.99746	+	NA	NA	NA	6	-896.345	1804.7	78.359	5.8e-19
353	-4.34151	+	NA	NA	NA	NA	NA	3.0114	+	NA	-5.24e-05	NA	5	-897.367	1804.74	78.4014	5.68e-19
614	-4.48989	+	0.454999	NA	-0.302338	NA	NA	2.98658	+	NA	NA	0.472845	7	-895.375	1804.76	78.421	5.63e-19
613	-4.38663	+	NA	NA	-0.347958	NA	NA	3.00681	+	NA	NA	0.447343	6	-896.404	1804.82	78.4779	5.47e-19
354	-4.44197	+	0.43683	NA	NA	NA	NA	2.99339	+	NA	6.85e-06	NA	6	-896.411	1804.83	78.4908	5.43e-19
866	-4.52865	+	0.457991	NA	NA	NA	NA	2.98319	+	NA	-8.67e-05	0.4787	7	-895.419	1804.85	78.5107	5.38e-19
865	-4.41975	+	NA	NA	NA	NA	NA	3.00281	+	NA	-0.000143189	0.454987	6	-896.462	1804.93	78.5929	5.16e-19
993	-3.87967	+	NA	NA	NA	NA	NA	3.00627	+	-0.124134	0.000626096	0.498629	7	-895.465	1804.94	78.6015	5.14e-19
481	-3.84972	+	NA	NA	NA	NA	NA	3.01443	+	-0.111793	0.000650283	NA	6	-896.542	1805.09	78.7534	4.77e-19
741	-3.78963	+	NA	NA	-0.331163	NA	NA	3.00988	+	-0.101972	NA	0.496852	7	-895.547	1805.1	78.7653	4.74e-19
229	-3.74753	+	NA	NA	-0.384927	NA	NA	3.01831	+	-0.0889203	NA	NA	6	-896.614	1805.24	78.8976	4.43e-19
994	-4.01882	+	0.413782	NA	NA	NA	NA	2.98702	+	-0.114613	0.000618085	0.515472	8	-894.615	1805.24	78.9055	4.42e-19
742	-3.93588	+	0.412528	NA	-0.291484	NA	NA	2.99003	+	-0.0928829	NA	0.514312	8	-894.703	1805.42	79.0798	4.05e-19
482	-3.98227	+	0.396473	NA	NA	NA	NA	2.99672	+	-0.102329	0.000644409	NA	7	-895.756	1805.52	79.1846	3.84e-19
230	-3.88599	+	0.394564	NA	-0.348976	NA	NA	3.00004	+	-0.0798163	NA	NA	7	-895.836	1805.68	79.344	3.55e-19
357	-4.26452	+	NA	NA	-0.391881	NA	NA	3.01604	+	NA	-5.57e-05	NA	6	-897.281	1806.57	80.2319	2.28e-19
358	-4.37182	+	0.432274	NA	-0.351274	NA	NA	2.99746	+	NA	3.23e-06	NA	7	-896.345	1806.7	80.3614	2.13e-19
870	-4.46753	+	0.453941	NA	-0.302675	NA	NA	2.98666	+	NA	-8.9e-05	0.474597	8	-895.371	1806.75	80.417	2.07e-19
869	-4.35061	+	NA	NA	-0.348233	NA	NA	3.00692	+	NA	-0.000145058	0.450354	7	-896.395	1806.8	80.4616	2.03e-19
997	-3.81631	+	NA	NA	-0.325967	NA	NA	3.01018	+	-0.123751	0.000621886	0.493838	8	-895.407	1806.83	80.4882	2e-19
485	-3.77611	+	NA	NA	-0.379468	NA	NA	3.01905	+	-0.111501	0.00064502	NA	7	-896.463	1806.93	80.597	1.9e-19
998	-3.96201	+	0.410057	NA	-0.286084	NA	NA	2.99039	+	-0.114363	0.000614371	0.511252	9	-894.573	1807.16	80.823	1.69e-19
486	-3.9143	+	0.392147	NA	-0.343284	NA	NA	3.00081	+	-0.102146	0.000639673	NA	8	-895.694	1807.4	81.0628	1.5e-19
786	-9.7767	+	0.543638	NA	NA	NA	0.902736	NA	NA	NA	-0.00166735	0.503631	6	-900.3	1812.61	86.2691	1.11e-20
274	-9.77101	+	0.521626	NA	NA	NA	0.910077	NA	NA	NA	-0.00155859	NA	5	-901.434	1812.87	86.5356	9.73e-21
658	-8.91006	+	0.499926	NA	NA	NA	0.817618	NA	NA	-0.114214	NA	0.531086	6	-900.518	1813.04	86.7061	8.94e-21
18	-9.4274	+	0.535127	NA	NA	NA	0.809424	NA	NA	NA	NA	NA	4	-902.662	1813.33	86.9903	7.75e-21
530	-9.41972	+	0.556504	NA	NA	NA	0.797267	NA	NA	NA	NA	0.469302	5	-901.672	1813.35	87.0119	7.67e-21
146	-9.001	+	0.48411	NA	NA	NA	0.830104	NA	NA	-0.0988131	NA	NA	5	-901.766	1813.54	87.2004	6.98e-21
657	-8.69329	+	NA	NA	NA	NA	0.804786	NA	NA	-0.124407	NA	0.513393	5	-901.779	1813.56	87.2252	6.89e-21
785	-9.60233	+	NA	NA	NA	NA	0.888544	NA	NA	NA	-0.0016688	0.476499	5	-901.796	1813.6	87.2589	6.78e-21
273	-9.60269	+	NA	NA	NA	NA	0.895924	NA	NA	NA	-0.00156627	NA	4	-902.822	1813.65	87.3102	6.61e-21
145	-8.78988	+	NA	NA	NA	NA	0.817516	NA	NA	-0.109232	NA	NA	4	-902.956	1813.91	87.5768	5.78e-21
914	-9.36417	+	0.511928	NA	NA	NA	0.884878	NA	NA	-0.0691025	-0.00120217	0.533286	7	-899.965	1813.94	87.6027	5.71e-21
790	-9.56391	+	0.530485	NA	-0.589361	NA	0.89767	NA	NA	NA	-0.00170658	0.488711	7	-900.083	1814.18	87.8382	5.07e-21
17	-9.25807	+	NA	NA	NA	NA	0.795127	NA	NA	NA	NA	NA	3	-904.115	1814.23	87.8943	4.93e-21
278	-9.52509	+	0.507071	NA	-0.671254	NA	0.903589	NA	NA	NA	-0.00160706	NA	6	-901.149	1814.31	87.9679	4.76e-21
402	-9.45228	+	0.495961	NA	NA	NA	0.897037	NA	NA	-0.0542594	-0.00118788	NA	6	-901.222	1814.45	88.1136	4.42e-21
529	-9.24597	+	NA	NA	NA	NA	0.783387	NA	NA	NA	NA	0.4411	4	-903.231	1814.46	88.1269	4.39e-21
913	-9.10898	+	NA	NA	NA	NA	0.86666	NA	NA	-0.0829802	-0.00110863	0.515125	6	-901.284	1814.58	88.2375	4.16e-21
850	-9.89422	+	0.546295	NA	NA	NA	0.915166	NA	+	NA	-0.00166217	0.506193	7	-900.295	1814.6	88.2623	4.1e-21
662	-8.69354	+	0.487476	NA	-0.562878	NA	0.810867	NA	NA	-0.115807	NA	0.517357	7	-900.335	1814.68	88.3412	3.95e-21
338	-9.74512	+	0.521078	NA	NA	NA	0.907324	NA	+	NA	-0.00155982	NA	6	-901.434	1814.87	88.5372	3.58e-21
22	-9.20334	+	0.523258	NA	-0.585581	NA	0.801005	NA	NA	NA	NA	NA	5	-902.452	1814.91	88.5708	3.52e-21
277	-9.33361	+	NA	NA	-0.735884	NA	0.888623	NA	NA	NA	-0.00161853	NA	5	-902.463	1814.93	88.5939	3.48e-21
401	-9.20403	+	NA	NA	NA	NA	0.879247	NA	NA	-0.0682184	-0.0010983	NA	5	-902.467	1814.94	88.6015	3.46e-21
789	-9.36371	+	NA	NA	-0.66183	NA	0.882667	NA	NA	NA	-0.00171208	0.459795	6	-901.509	1815.02	88.6872	3.32e-21
534	-9.2276	+	0.545856	NA	-0.509863	NA	0.790612	NA	NA	NA	NA	0.456872	6	-901.516	1815.04	88.701	3.3e-21
722	-9.01388	+	0.502276	NA	NA	NA	0.828516	NA	+	-0.113817	NA	0.53313	7	-900.515	1815.04	88.7017	3.29e-21
150	-8.74421	+	0.46982	NA	-0.650159	NA	0.82144	NA	NA	-0.101123	NA	NA	6	-901.517	1815.04	88.7043	3.29e-21
661	-8.45173	+	NA	NA	-0.636264	NA	0.797199	NA	NA	-0.125972	NA	0.497744	6	-901.533	1815.07	88.7363	3.24e-21
149	-8.50974	+	NA	NA	-0.71823	NA	0.807971	NA	NA	-0.111503	NA	NA	5	-902.638	1815.28	88.944	2.92e-21
594	-9.65376	+	0.561385	NA	NA	NA	0.822412	NA	+	NA	NA	0.474134	6	-901.655	1815.32	88.9803	2.87e-21
82	-9.52085	+	0.537032	NA	NA	NA	0.819525	NA	+	NA	NA	NA	5	-902.66	1815.32	88.9865	2.86e-21
918	-9.14626	+	0.498564	NA	-0.602768	NA	0.879765	NA	NA	-0.069394	-0.00124016	0.518038	8	-899.746	1815.5	89.1672	2.61e-21
210	-8.96093	+	0.483208	NA	NA	NA	0.825887	NA	+	-0.0989881	NA	NA	6	-901.766	1815.54	89.2015	2.57e-21
721	-8.62622	+	NA	NA	NA	NA	0.797701	NA	+	-0.124621	NA	0.512042	6	-901.777	1815.56	89.2242	2.54e-21
849	-9.54522	+	NA	NA	NA	NA	0.882486	NA	+	NA	-0.00167131	0.475253	6	-901.795	1815.6	89.2586	2.49e-21
337	-9.4166	+	NA	NA	NA	NA	0.876089	NA	+	NA	-0.00157526	NA	5	-902.81	1815.62	89.2873	2.46e-21
21	-9.00905	+	NA	NA	-0.651752	NA	0.785621	NA	NA	NA	NA	NA	4	-903.842	1815.69	89.3502	2.38e-21
406	-9.19552	+	0.480804	NA	-0.68977	NA	0.890234	NA	NA	-0.0551074	-0.00123159	NA	7	-900.93	1815.87	89.5326	2.17e-21
209	-8.58883	+	NA	NA	NA	NA	0.79622	NA	+	-0.109979	NA	NA	5	-902.942	1815.89	89.5516	2.15e-21
978	-9.43385	+	0.513566	NA	NA	NA	0.892162	NA	+	-0.068876	-0.00120075	0.534709	8	-899.964	1815.94	89.6022	2.1e-21
917	-8.86892	+	NA	NA	-0.674394	NA	0.86102	NA	NA	-0.0829641	-0.00115265	0.497925	7	-900.998	1816.01	89.6674	2.03e-21
533	-9.026	+	NA	NA	-0.584058	NA	0.775606	NA	NA	NA	NA	0.426895	5	-903.016	1816.04	89.6987	2e-21
854	-9.87193	+	0.536587	NA	-0.648739	NA	0.932007	NA	+	NA	-0.00169581	0.494331	8	-900.049	1816.11	89.7727	1.93e-21
405	-8.92682	+	NA	NA	-0.756158	NA	0.87187	NA	NA	-0.0687377	-0.00114842	NA	6	-902.102	1816.21	89.8735	1.83e-21
81	-9.1863	+	NA	NA	NA	NA	0.78735	NA	+	NA	NA	NA	4	-904.113	1816.23	89.8923	1.82e-21
342	-9.72238	+	0.510896	NA	-0.710527	NA	0.925707	NA	+	NA	-0.00159957	NA	7	-901.135	1816.28	89.9418	1.77e-21
466	-9.37825	+	0.494285	NA	NA	NA	0.889262	NA	+	-0.0545307	-0.00118941	NA	7	-901.22	1816.45	90.1124	1.63e-21
593	-9.29966	+	NA	NA	NA	NA	0.78917	NA	+	NA	NA	0.442196	5	-903.23	1816.46	90.1268	1.62e-21
977	-9.00671	+	NA	NA	NA	NA	0.8559	NA	+	-0.0832202	-0.00111132	0.512989	7	-901.28	1816.57	90.2325	1.53e-21
726	-8.97986	+	0.493144	NA	-0.619343	NA	0.842549	NA	+	-0.114822	NA	0.522041	8	-900.307	1816.63	90.2881	1.49e-21
86	-9.49481	+	0.528453	NA	-0.641597	NA	0.834024	NA	+	NA	NA	NA	6	-902.423	1816.85	90.5154	1.33e-21
465	-8.96833	+	NA	NA	NA	NA	0.854374	NA	+	-0.068891	-0.00110465	NA	6	-902.448	1816.9	90.5649	1.3e-21
341	-9.39787	+	NA	NA	-0.749017	NA	0.895853	NA	+	NA	-0.00161612	NA	6	-902.462	1816.93	90.5927	1.28e-21
598	-9.62876	+	0.553161	NA	-0.584474	NA	0.835761	NA	+	NA	NA	0.463815	7	-901.463	1816.93	90.597	1.28e-21
68	-3.71753	+	0.496044	1.13862	NA	NA	NA	NA	+	NA	NA	NA	5	-903.496	1817	90.66	1.24e-21
853	-9.52601	+	NA	NA	-0.69405	NA	0.900834	NA	+	NA	-0.0017066	0.462734	7	-901.499	1817.01	90.6695	1.23e-21
214	-8.92268	+	0.473344	NA	-0.686013	NA	0.841253	NA	+	-0.100436	NA	NA	7	-901.507	1817.02	90.6849	1.22e-21
725	-8.59584	+	NA	NA	-0.665944	NA	0.813273	NA	+	-0.125569	NA	0.500148	7	-901.526	1817.06	90.7235	1.2e-21
580	-3.82428	+	0.520743	1.11715	NA	NA	NA	NA	+	NA	NA	0.450819	6	-902.626	1817.26	90.9218	1.09e-21
213	-8.55487	+	NA	NA	-0.72771	NA	0.813023	NA	+	-0.111359	NA	NA	6	-902.638	1817.28	90.9445	1.07e-21
802	-6.84102	+	0.546945	NA	NA	NA	NA	2.91831	NA	NA	0.00173231	0.588149	6	-902.694	1817.4	91.0582	1.01e-21
982	-9.41198	+	0.504039	NA	-0.654955	NA	0.909105	NA	+	-0.0685573	-0.00123686	0.522519	9	-899.722	1817.46	91.1206	9.83e-22
67	-3.61775	+	NA	1.13268	NA	NA	NA	NA	+	NA	NA	NA	4	-904.737	1817.48	91.1389	9.74e-22
930	-6.16602	+	0.502475	NA	NA	NA	NA	2.92136	NA	-0.136381	0.00251903	0.623833	7	-901.761	1817.53	91.1941	9.48e-22
85	-9.16309	+	NA	NA	-0.682094	NA	0.803123	NA	+	NA	NA	NA	5	-903.834	1817.67	91.335	8.83e-22
546	-6.73884	+	0.541266	NA	NA	NA	NA	2.91005	NA	NA	NA	0.639168	5	-903.857	1817.72	91.3809	8.63e-22
470	-9.35385	+	0.48405	NA	-0.721469	NA	0.907784	NA	+	-0.054529	-0.0012299	NA	8	-900.922	1817.86	91.5176	8.06e-22
579	-3.71194	+	NA	1.11136	NA	NA	NA	NA	+	NA	NA	0.417735	5	-903.981	1817.97	91.6295	7.62e-22
929	-6.00568	+	NA	NA	NA	NA	NA	2.93961	NA	-0.148728	0.00254271	0.60805	6	-902.989	1817.98	91.6467	7.56e-22
708	-3.26758	+	0.481369	1.11642	NA	NA	NA	NA	+	-0.0928343	NA	0.489682	7	-901.989	1817.99	91.649	7.55e-22
597	-9.27678	+	NA	NA	-0.632029	NA	0.803922	NA	+	NA	NA	0.431215	6	-902.994	1817.99	91.657	7.52e-22
981	-8.98972	+	NA	NA	-0.699229	NA	0.874458	NA	+	-0.0826827	-0.00115064	0.500001	8	-900.992	1818	91.6591	7.51e-22
196	-3.22702	+	0.46051	1.13918	NA	NA	NA	NA	+	-0.0806209	NA	NA	6	-903.003	1818.01	91.6757	7.45e-22
195	-3.07278	+	NA	1.13411	NA	NA	NA	NA	+	-0.0908785	NA	NA	5	-904.068	1818.14	91.8037	6.99e-22
550	-6.31814	+	0.520529	NA	-1.32423	NA	NA	2.92677	NA	NA	NA	0.612734	6	-903.08	1818.17	91.8286	6.9e-22
806	-6.4606	+	0.527815	NA	-1.17245	NA	NA	2.93285	NA	NA	0.00161065	0.568305	7	-902.082	1818.17	91.8354	6.88e-22
469	-8.94925	+	NA	NA	-0.760843	NA	0.874384	NA	+	-0.0686831	-0.00114795	NA	7	-902.102	1818.21	91.8755	6.74e-22
707	-3.10428	+	NA	1.11123	NA	NA	NA	NA	+	-0.102952	NA	0.46529	6	-903.144	1818.3	91.9575	6.47e-22
801	-6.73921	+	NA	NA	NA	NA	NA	2.9367	NA	NA	0.00168628	0.565728	5	-904.147	1818.3	91.9607	6.46e-22
290	-6.82385	+	0.526644	NA	NA	NA	NA	2.92769	NA	NA	0.00192188	NA	5	-904.16	1818.32	91.9868	6.38e-22
934	-5.81334	+	0.484626	NA	-1.13228	NA	NA	2.93582	NA	-0.133369	0.00238433	0.603582	8	-901.188	1818.39	92.0501	6.18e-22
545	-6.64004	+	NA	NA	NA	NA	NA	2.92852	NA	NA	NA	0.616511	4	-905.281	1818.57	92.2275	5.65e-22
933	-5.6394	+	NA	NA	-1.18886	NA	NA	2.95512	NA	-0.145075	0.00239851	0.587011	7	-902.333	1818.68	92.3386	5.35e-22
418	-6.21522	+	0.486579	NA	NA	NA	NA	2.93031	NA	-0.123923	0.00265242	NA	6	-903.397	1818.8	92.4639	5.02e-22
549	-6.2011	+	NA	NA	-1.3844	NA	NA	2.94633	NA	NA	NA	0.58947	5	-904.402	1818.81	92.4719	5e-22
805	-6.33788	+	NA	NA	-1.23928	NA	NA	2.95237	NA	NA	0.00155699	0.545288	6	-903.439	1818.89	92.5476	4.82e-22
294	-6.41116	+	0.506869	NA	-1.26316	NA	NA	2.94309	NA	NA	0.00178068	NA	6	-903.453	1818.91	92.5748	4.75e-22
72	-3.66543	+	0.493085	1.13855	-0.261697	NA	NA	NA	+	NA	NA	NA	6	-903.462	1818.93	92.593	4.71e-22
324	-3.71153	+	0.495768	1.13869	NA	NA	NA	NA	+	NA	-2.36e-05	NA	6	-903.496	1819	92.6616	4.55e-22
289	-6.72603	+	NA	NA	NA	NA	NA	2.94449	NA	NA	0.00186972	NA	4	-905.517	1819.04	92.6989	4.47e-22
417	-6.05927	+	NA	NA	NA	NA	NA	2.94704	NA	-0.136231	0.0026727	NA	5	-904.556	1819.12	92.7795	4.29e-22
34	-6.71786	+	0.519158	NA	NA	NA	NA	2.91716	NA	NA	NA	NA	4	-905.583	1819.17	92.8313	4.18e-22
584	-3.78072	+	0.518185	1.11718	-0.215704	NA	NA	NA	+	NA	NA	0.448052	7	-902.603	1819.22	92.878	4.08e-22
836	-3.79736	+	0.519581	1.11742	NA	NA	NA	NA	+	NA	-0.000107208	0.452739	7	-902.622	1819.25	92.915	4.01e-22
38	-6.25435	+	0.497785	NA	-1.44667	NA	NA	2.93509	NA	NA	NA	NA	5	-904.67	1819.35	93.0081	3.83e-22
71	-3.55762	+	NA	1.13266	-0.305541	NA	NA	NA	+	NA	NA	NA	5	-904.687	1819.38	93.0415	3.76e-22
293	-6.29447	+	NA	NA	-1.3237	NA	NA	2.96096	NA	NA	0.00172153	NA	5	-904.715	1819.43	93.0967	3.66e-22
422	-5.82591	+	0.467816	NA	-1.23512	NA	NA	2.94573	NA	-0.12089	0.00249612	NA	7	-902.723	1819.45	93.1171	3.62e-22
323	-3.59542	+	NA	1.13297	NA	NA	NA	NA	+	NA	-8.84e-05	NA	5	-904.733	1819.47	93.1339	3.59e-22
674	-6.50782	+	0.526682	NA	NA	NA	NA	2.90969	NA	-0.0435792	NA	0.658208	6	-903.738	1819.48	93.1454	3.57e-22
421	-5.65757	+	NA	NA	-1.28779	NA	NA	2.96344	NA	-0.132545	0.00250682	NA	6	-903.798	1819.6	93.2648	3.36e-22
964	-3.29287	+	0.479161	1.11477	NA	NA	NA	NA	+	-0.113281	0.000590401	0.487164	8	-901.875	1819.76	93.4254	3.11e-22
452	-3.25381	+	0.458378	1.1375	NA	NA	NA	NA	+	-0.10179	0.000610603	NA	7	-902.881	1819.77	93.4337	3.09e-22
37	-6.14381	+	NA	NA	-1.49939	NA	NA	2.95307	NA	NA	NA	NA	4	-905.89	1819.78	93.4465	3.07e-22
33	-6.62323	+	NA	NA	NA	NA	NA	2.93411	NA	NA	NA	NA	3	-906.904	1819.81	93.4716	3.03e-22
451	-3.09987	+	NA	1.13239	NA	NA	NA	NA	+	-0.112344	0.000617315	NA	6	-903.936	1819.88	93.5416	2.93e-22
583	-3.65888	+	NA	1.11148	-0.265956	NA	NA	NA	+	NA	NA	0.414409	6	-903.944	1819.9	93.5575	2.91e-22
678	-6.07245	+	0.505002	NA	-1.33457	NA	NA	2.92664	NA	-0.0457243	NA	0.632391	7	-902.949	1819.91	93.569	2.89e-22
835	-3.67013	+	NA	1.11182	NA	NA	NA	NA	+	NA	-0.000168098	0.420936	6	-903.969	1819.95	93.6076	2.83e-22
712	-3.22697	+	0.479057	1.11648	-0.202435	NA	NA	NA	+	-0.0927658	NA	0.486834	8	-901.968	1819.95	93.6109	2.83e-22
200	-3.17567	+	0.457684	1.13913	-0.256683	NA	NA	NA	+	-0.0806379	NA	NA	7	-902.97	1819.95	93.6118	2.83e-22
963	-3.12997	+	NA	1.10952	NA	NA	NA	NA	+	-0.123823	0.000599835	0.462871	7	-903.02	1820.05	93.7124	2.69e-22
199	-3.01456	+	NA	1.13412	-0.296169	NA	NA	NA	+	-0.0908399	NA	NA	6	-904.022	1820.05	93.713	2.69e-22
673	-6.34685	+	NA	NA	NA	NA	NA	2.92785	NA	-0.0554324	NA	0.642317	5	-905.081	1820.17	93.8291	2.54e-22
711	-3.05562	+	NA	1.11136	-0.246735	NA	NA	NA	+	-0.10282	NA	0.46183	7	-903.112	1820.23	93.8961	2.45e-22
677	-5.89586	+	NA	NA	-1.39428	NA	NA	2.94593	NA	-0.0571979	NA	0.615739	6	-904.188	1820.38	94.0459	2.28e-22
328	-3.65874	+	0.492779	1.13862	-0.261878	NA	NA	NA	+	NA	-2.61e-05	NA	7	-903.461	1820.93	94.5948	1.73e-22
162	-6.58399	+	0.510683	NA	NA	NA	NA	2.91675	NA	-0.0255567	NA	NA	5	-905.543	1821.09	94.7526	1.6e-22
840	-3.75334	+	0.517005	1.11745	-0.21611	NA	NA	NA	+	NA	-0.000108663	0.44998	8	-902.598	1821.21	94.8713	1.51e-22
166	-6.10122	+	0.488104	NA	-1.45695	NA	NA	2.93483	NA	-0.02855	NA	NA	6	-904.62	1821.25	94.9089	1.48e-22
327	-3.53457	+	NA	1.13297	-0.305954	NA	NA	NA	+	NA	-9.09e-05	NA	6	-904.683	1821.37	95.0365	1.39e-22
165	-5.92992	+	NA	NA	-1.51197	NA	NA	2.95253	NA	-0.040138	NA	NA	5	-905.786	1821.58	95.2394	1.25e-22
161	-6.42698	+	NA	NA	NA	NA	NA	2.9334	NA	-0.0375409	NA	NA	4	-906.813	1821.63	95.2925	1.22e-22
456	-3.20353	+	0.455611	1.13748	-0.250895	NA	NA	NA	+	-0.101677	0.000607663	NA	8	-902.849	1821.71	95.3735	1.17e-22
968	-3.25335	+	0.476915	1.11484	-0.196807	NA	NA	NA	+	-0.113138	0.000588385	0.484427	9	-901.856	1821.73	95.3902	1.16e-22
455	-3.04267	+	NA	1.13242	-0.290676	NA	NA	NA	+	-0.112151	0.000613564	NA	7	-903.892	1821.79	95.4552	1.13e-22
839	-3.61666	+	NA	1.11194	-0.266225	NA	NA	NA	+	NA	-0.000169482	0.417612	7	-903.932	1821.87	95.5357	1.08e-22
967	-3.08236	+	NA	1.10968	-0.241223	NA	NA	NA	+	-0.123551	0.000596814	0.45951	8	-902.99	1821.99	95.6545	1.02e-22
772	-6.0699	+	0.60022	1.11771	NA	NA	NA	NA	NA	NA	0.00166957	0.558293	6	-909.328	1830.66	104.326	1.33e-24
516	-5.96967	+	0.595149	1.12203	NA	NA	NA	NA	NA	NA	NA	0.605789	5	-910.381	1830.77	104.429	1.27e-24
578	-3.79969	+	0.507166	NA	NA	NA	NA	NA	+	NA	NA	0.51329	5	-910.408	1830.82	104.484	1.23e-24
900	-5.40685	+	0.558567	1.11511	NA	NA	NA	NA	NA	-0.134195	0.00244578	0.592385	7	-908.446	1830.9	104.564	1.18e-24
66	-3.67893	+	0.482472	NA	NA	NA	NA	NA	+	NA	NA	NA	4	-911.556	1831.12	104.778	1.06e-24
260	-6.04703	+	0.576024	1.14239	NA	NA	NA	NA	NA	NA	0.00184171	NA	5	-910.634	1831.27	104.935	9.84e-25
577	-3.69134	+	NA	NA	NA	NA	NA	NA	+	NA	NA	0.484884	4	-911.699	1831.4	105.063	9.23e-25
65	-3.58191	+	NA	NA	NA	NA	NA	NA	+	NA	NA	NA	3	-912.734	1831.47	105.132	8.91e-25
520	-5.58554	+	0.5774	1.12173	-1.21253	NA	NA	NA	NA	NA	NA	0.581598	6	-909.745	1831.5	105.16	8.79e-25
706	-3.22663	+	0.467938	NA	NA	NA	NA	NA	+	-0.0955033	NA	0.551181	6	-909.756	1831.52	105.182	8.69e-25
776	-5.7247	+	0.584006	1.11779	-1.06719	NA	NA	NA	NA	NA	0.001562	0.540344	7	-908.835	1831.68	105.343	8.02e-25
705	-3.06821	+	NA	NA	NA	NA	NA	NA	+	-0.105435	NA	0.530691	5	-910.853	1831.71	105.374	7.9e-25
388	-5.447	+	0.538026	1.14112	NA	NA	NA	NA	NA	-0.122305	0.00256374	NA	6	-909.905	1831.82	105.479	7.49e-25
4	-5.9428	+	0.568923	1.1481	NA	NA	NA	NA	NA	NA	NA	NA	4	-911.913	1831.83	105.493	7.44e-25
899	-5.2228	+	NA	1.10834	NA	NA	NA	NA	NA	-0.147178	0.00246633	0.569275	6	-909.975	1831.96	105.619	6.99e-25
904	-5.08777	+	0.543679	1.11535	-1.02481	NA	NA	NA	NA	-0.131565	0.00232714	0.574076	8	-907.99	1831.99	105.654	6.87e-25
264	-5.67189	+	0.559351	1.14192	-1.15264	NA	NA	NA	NA	NA	0.00171664	NA	6	-910.06	1832.13	105.789	6.42e-25
194	-3.18098	+	0.44786	NA	NA	NA	NA	NA	+	-0.0818858	NA	NA	5	-911.065	1832.13	105.797	6.39e-25
193	-3.03097	+	NA	NA	NA	NA	NA	NA	+	-0.0918667	NA	NA	4	-912.077	1832.16	105.819	6.32e-25
771	-5.94802	+	NA	1.11042	NA	NA	NA	NA	NA	NA	0.00161715	0.52786	5	-911.091	1832.19	105.849	6.23e-25
515	-5.85122	+	NA	1.11467	NA	NA	NA	NA	NA	NA	NA	0.575246	4	-912.116	1832.24	105.898	6.08e-25
8	-5.51941	+	0.550757	1.14714	-1.32675	NA	NA	NA	NA	NA	NA	NA	5	-911.161	1832.33	105.989	5.81e-25
644	-5.73467	+	0.580953	1.12191	NA	NA	NA	NA	NA	-0.0443626	NA	0.624676	6	-910.26	1832.53	106.189	5.25e-25
259	-5.93115	+	NA	1.13549	NA	NA	NA	NA	NA	NA	0.00178135	NA	4	-912.269	1832.54	106.204	5.22e-25
387	-5.26896	+	NA	1.1349	NA	NA	NA	NA	NA	-0.135311	0.00257914	NA	5	-911.332	1832.67	106.332	4.89e-25
392	-5.09348	+	0.522412	1.14083	-1.12233	NA	NA	NA	NA	-0.119688	0.002426	NA	7	-909.362	1832.73	106.395	4.74e-25
519	-5.4478	+	NA	1.11482	-1.27501	NA	NA	NA	NA	NA	NA	0.550297	5	-911.384	1832.77	106.435	4.65e-25
582	-3.7561	+	0.504737	NA	-0.216285	NA	NA	NA	+	NA	NA	0.510668	6	-910.386	1832.78	106.441	4.63e-25
834	-3.77937	+	0.506323	NA	NA	NA	NA	NA	+	NA	-8.09e-05	0.514639	6	-910.406	1832.82	106.481	4.54e-25
903	-4.88822	+	NA	1.10898	-1.08432	NA	NA	NA	NA	-0.144027	0.00233874	0.550065	7	-909.442	1832.89	106.555	4.38e-25
775	-5.58073	+	NA	1.11091	-1.13673	NA	NA	NA	NA	NA	0.00150181	0.509211	6	-910.508	1833.02	106.686	4.1e-25
3	-5.83056	+	NA	1.14131	NA	NA	NA	NA	NA	NA	NA	NA	3	-913.511	1833.02	106.687	4.1e-25
70	-3.62551	+	0.479579	NA	-0.268297	NA	NA	NA	+	NA	NA	NA	5	-911.521	1833.05	106.709	4.05e-25
322	-3.68184	+	0.482604	NA	NA	NA	NA	NA	+	NA	1.13e-05	NA	5	-911.556	1833.12	106.779	3.91e-25
263	-5.53648	+	NA	1.13534	-1.21425	NA	NA	NA	NA	NA	0.00164918	NA	5	-911.607	1833.22	106.881	3.72e-25
648	-5.33713	+	0.562446	1.12164	-1.22196	NA	NA	NA	NA	-0.0462994	NA	0.60088	7	-909.614	1833.24	106.9	3.68e-25
962	-3.25461	+	0.465583	NA	NA	NA	NA	NA	+	-0.11779	0.000644941	0.548784	7	-909.626	1833.26	106.924	3.64e-25
7	-5.39087	+	NA	1.14067	-1.37977	NA	NA	NA	NA	NA	NA	NA	4	-912.664	1833.33	106.994	3.51e-25
581	-3.63858	+	NA	NA	-0.264728	NA	NA	NA	+	NA	NA	0.481745	5	-911.663	1833.33	106.994	3.51e-25
69	-3.52074	+	NA	NA	-0.310748	NA	NA	NA	+	NA	NA	NA	4	-912.684	1833.37	107.035	3.44e-25
833	-3.65605	+	NA	NA	NA	NA	NA	NA	+	NA	-0.000141714	0.487383	5	-911.69	1833.39	107.048	3.42e-25
391	-4.90188	+	NA	1.13493	-1.17582	NA	NA	NA	NA	-0.132178	0.00243281	NA	6	-910.712	1833.43	107.093	3.34e-25
961	-3.09653	+	NA	NA	NA	NA	NA	NA	+	-0.128089	0.000653059	0.528389	6	-910.712	1833.43	107.093	3.34e-25
321	-3.56868	+	NA	NA	NA	NA	NA	NA	+	NA	-5.24e-05	NA	4	-912.733	1833.47	107.131	3.28e-25
710	-3.18649	+	0.465778	NA	-0.201005	NA	NA	NA	+	-0.0954164	NA	0.548506	7	-909.737	1833.48	107.145	3.26e-25
709	-3.02039	+	NA	NA	-0.243386	NA	NA	NA	+	-0.105285	NA	0.527442	6	-910.823	1833.65	107.316	2.99e-25
132	-5.79862	+	0.560072	1.14833	NA	NA	NA	NA	NA	-0.0275096	NA	NA	5	-911.867	1833.74	107.402	2.86e-25
643	-5.55029	+	NA	1.11485	NA	NA	NA	NA	NA	-0.0568995	NA	0.601414	5	-911.908	1833.82	107.483	2.75e-25
450	-3.21062	+	0.445568	NA	NA	NA	NA	NA	+	-0.104829	0.000664588	NA	6	-910.925	1833.86	107.52	2.7e-25
449	-3.06086	+	NA	NA	NA	NA	NA	NA	+	-0.115081	0.000670252	NA	5	-911.927	1833.86	107.521	2.7e-25
197	-2.97223	+	NA	NA	-0.299854	NA	NA	NA	+	-0.0917937	NA	NA	5	-912.031	1834.07	107.729	2.43e-25
198	-3.12886	+	0.445106	NA	-0.261801	NA	NA	NA	+	-0.0818723	NA	NA	6	-911.031	1834.07	107.732	2.43e-25
136	-5.35734	+	0.540868	1.14741	-1.33671	NA	NA	NA	NA	-0.0302408	NA	NA	6	-911.105	1834.22	107.879	2.26e-25
647	-5.13545	+	NA	1.11504	-1.28405	NA	NA	NA	NA	-0.0585589	NA	0.576709	6	-911.163	1834.33	107.996	2.13e-25
838	-3.7353	+	0.503861	NA	-0.216639	NA	NA	NA	+	NA	-8.24e-05	0.512037	7	-910.383	1834.78	108.438	1.71e-25
131	-5.61981	+	NA	1.14193	NA	NA	NA	NA	NA	-0.0402711	NA	NA	4	-913.408	1834.82	108.482	1.67e-25
326	-3.62779	+	0.479678	NA	-0.268258	NA	NA	NA	+	NA	8.72e-06	NA	6	-911.521	1835.05	108.711	1.49e-25
135	-5.16311	+	NA	1.14138	-1.39222	NA	NA	NA	NA	-0.0427227	NA	NA	5	-912.547	1835.1	108.762	1.45e-25
966	-3.21577	+	0.463497	NA	-0.19423	NA	NA	NA	+	-0.117604	0.000642402	0.546214	8	-909.608	1835.23	108.891	1.36e-25
837	-3.60285	+	NA	NA	-0.265041	NA	NA	NA	+	NA	-0.000143194	0.484243	6	-911.655	1835.32	108.979	1.3e-25
325	-3.50683	+	NA	NA	-0.311001	NA	NA	NA	+	NA	-5.49e-05	NA	5	-912.683	1835.37	109.034	1.27e-25
965	-3.04995	+	NA	NA	-0.236792	NA	NA	NA	+	-0.127803	0.00064978	0.525229	7	-910.684	1835.38	109.039	1.26e-25
453	-3.00342	+	NA	NA	-0.293153	NA	NA	NA	+	-0.114832	0.000666123	NA	6	-911.883	1835.77	109.436	1.04e-25
454	-3.15979	+	0.442892	NA	-0.254873	NA	NA	NA	+	-0.104666	0.000660946	NA	7	-910.894	1835.8	109.46	1.02e-25
770	-6.08797	+	0.584413	NA	NA	NA	NA	NA	NA	NA	0.00172676	0.61634	5	-917.093	1844.19	117.853	1.54e-27
898	-5.40066	+	0.542708	NA	NA	NA	NA	NA	NA	-0.13881	0.00252891	0.65017	6	-916.177	1844.36	118.023	1.41e-27
514	-5.98542	+	0.579071	NA	NA	NA	NA	NA	NA	NA	NA	0.662308	4	-918.18	1844.36	118.027	1.41e-27
518	-5.59542	+	0.561937	NA	-1.2314	NA	NA	NA	NA	NA	NA	0.639085	5	-917.545	1845.1	118.758	9.8e-28
774	-5.73886	+	0.568777	NA	-1.07977	NA	NA	NA	NA	NA	0.00161758	0.59912	6	-916.603	1845.21	118.875	9.24e-28
897	-5.22197	+	NA	NA	NA	NA	NA	NA	NA	-0.151457	0.00254724	0.631207	5	-917.626	1845.26	118.92	9.03e-28
258	-6.06425	+	0.561483	NA	NA	NA	NA	NA	NA	NA	0.00191443	NA	4	-918.713	1845.43	119.093	8.29e-28
902	-5.07978	+	0.528406	NA	-1.03242	NA	NA	NA	NA	-0.136045	0.00240822	0.632617	7	-915.726	1845.46	119.124	8.16e-28
769	-5.96989	+	NA	NA	NA	NA	NA	NA	NA	NA	0.00167389	0.590703	4	-918.77	1845.54	119.206	7.83e-28
513	-5.87078	+	NA	NA	NA	NA	NA	NA	NA	NA	NA	0.636558	3	-919.83	1845.66	119.324	7.38e-28
386	-5.44633	+	0.523978	NA	NA	NA	NA	NA	NA	-0.125803	0.00265624	NA	5	-917.968	1845.94	119.604	6.42e-28
2	-5.95801	+	0.554482	NA	NA	NA	NA	NA	NA	NA	NA	NA	3	-920.045	1846.09	119.755	5.95e-28
642	-5.74133	+	0.564817	NA	NA	NA	NA	NA	NA	-0.046045	NA	0.680903	5	-918.055	1846.11	119.777	5.89e-28
517	-5.46231	+	NA	NA	-1.29132	NA	NA	NA	NA	NA	NA	0.612578	4	-919.104	1846.21	119.873	5.61e-28
901	-4.88627	+	NA	NA	-1.08942	NA	NA	NA	NA	-0.148191	0.00241801	0.612777	6	-917.104	1846.21	119.877	5.6e-28
262	-5.68185	+	0.54517	NA	-1.17435	NA	NA	NA	NA	NA	0.00178681	NA	5	-918.136	1846.28	119.94	5.43e-28
773	-5.59951	+	NA	NA	-1.14689	NA	NA	NA	NA	NA	0.00155728	0.572792	5	-918.196	1846.4	120.06	5.11e-28
257	-5.95158	+	NA	NA	NA	NA	NA	NA	NA	NA	0.00185528	NA	3	-920.273	1846.55	120.211	4.74e-28
6	-5.52482	+	0.536695	NA	-1.35619	NA	NA	NA	NA	NA	NA	NA	4	-919.285	1846.57	120.236	4.68e-28
385	-5.27339	+	NA	NA	NA	NA	NA	NA	NA	-0.138416	0.00267075	NA	4	-919.328	1846.66	120.322	4.48e-28
646	-5.33836	+	0.546969	NA	-1.24003	NA	NA	NA	NA	-0.0479218	NA	0.658024	6	-917.409	1846.83	120.488	4.13e-28
390	-5.08797	+	0.508753	NA	-1.13996	NA	NA	NA	NA	-0.12295	0.00251471	NA	6	-917.424	1846.86	120.518	4.06e-28
1	-5.84887	+	NA	NA	NA	NA	NA	NA	NA	NA	NA	NA	2	-921.569	1847.14	120.802	3.53e-28
261	-5.55017	+	NA	NA	-1.2344	NA	NA	NA	NA	NA	0.00172068	NA	4	-919.612	1847.23	120.89	3.37e-28
641	-5.5621	+	NA	NA	NA	NA	NA	NA	NA	-0.058317	NA	0.661841	4	-919.619	1847.24	120.903	3.35e-28
389	-4.9018	+	NA	NA	-1.19186	NA	NA	NA	NA	-0.135061	0.00252078	NA	5	-918.71	1847.43	121.088	3.06e-28
5	-5.3998	+	NA	NA	-1.40796	NA	NA	NA	NA	NA	NA	NA	3	-920.718	1847.44	121.101	3.04e-28
645	-5.14266	+	NA	NA	-1.29932	NA	NA	NA	NA	-0.0599298	NA	0.638078	5	-918.881	1847.77	121.43	2.58e-28
130	-5.81253	+	0.545945	NA	NA	NA	NA	NA	NA	-0.0277778	NA	NA	4	-920	1848	121.666	2.29e-28
134	-5.36209	+	0.527193	NA	-1.36551	NA	NA	NA	NA	-0.0304172	NA	NA	5	-919.231	1848.47	122.129	1.82e-28
129	-5.63856	+	NA	NA	NA	NA	NA	NA	NA	-0.0402064	NA	NA	3	-921.47	1848.94	122.605	1.43e-28
133	-5.17322	+	NA	NA	-1.41934	NA	NA	NA	NA	-0.0425653	NA	NA	4	-920.607	1849.22	122.88	1.25e-28

## Sheet: Mpala
	cond((Int))	disp((Int))	cond(All_Livestock_1)	cond(Dist_Road_K)	cond(Fencing_2)	cond(Height_meters)	cond(ndvi)	cond(Underpass_type)	cond(Water_source)	cond(Width_meters)	df	logLik	AICc	delta	weight
53	-5.8076	+	NA	NA	1.2407	NA	-2.31593	-4.0132	NA	NA	6	-262.439	536.886	0	0.0416193		Family: binomial ( logit )
117	-6.72928	+	NA	NA	+	NA	-2.22962	+	0.171701	NA	7	-261.464	536.937	0.0512779	0.0405658		Formula: Impalas ~ ndvi + Dist_Road_K + Fencing_2 + Water_source + Underpass_type +
101	-7.20921	+	NA	NA	+	NA	NA	+	0.175364	NA	6	-262.494	536.995	0.109564	0.0394007		All_Livestock_1 + Width_meters + Height_meters + (1 | Unique_ID) + (1 | Road_Section.x)
37	-6.29315	+	NA	NA	+	NA	NA	+	NA	NA	5	-263.552	537.109	0.223479	0.0372192		Data: nomitdata
181	-6.11185	+	NA	NA	+	NA	-2.28008	+	NA	0.00183166	7	-261.579	537.168	0.282514	0.0361367
165	-6.58775	+	NA	NA	+	NA	NA	+	NA	0.00182678	6	-262.655	537.317	0.431517	0.0335423		AIC BIC logLik deviance df.resid
61	-8.09644	+	NA	NA	+	0.340139	-2.35449	+	NA	NA	7	-262.047	538.103	1.21699	0.022648		543.0 624.3 -260.5 521.0 11899
125	-8.73029	+	NA	NA	+	0.300768	-2.27001	+	0.165453	NA	8	-261.081	538.173	1.28767	0.0218615
54	-5.64133	+	-0.651207	NA	+	NA	-2.32309	+	NA	NA	7	-262.086	538.181	1.29592	0.0217716		Random effects:
55	-6.01565	+	NA	1.3468	+	NA	-2.35182	+	NA	NA	7	-262.096	538.201	1.31568	0.0215575
109	-9.07825	+	NA	NA	+	0.278421	NA	+	0.169778	NA	7	-262.147	538.304	1.41838	0.0204785		Conditional model:
119	-6.88532	+	NA	1.10045	+	NA	-2.26627	+	0.168981	NA	8	-261.176	538.364	1.47831	0.0198739		Groups Name Variance Std.Dev.
118	-6.52931	+	-0.578121	NA	+	NA	-2.23727	+	0.160039	NA	8	-261.19	538.391	1.50594	0.0196013		Unique_ID (Intercept) 4.657e+00 2.1581146
45	-8.45241	+	NA	NA	+	0.318563	NA	+	NA	NA	6	-263.195	538.397	1.51176	0.0195443		Road_Section.x (Intercept) 1.879e-08 0.0001371
38	-6.12984	+	-0.649173	NA	+	NA	NA	+	NA	NA	6	-263.2	538.408	1.52203	0.0194442		Number of obs: 11910, groups: Unique_ID, 72; Road_Section.x, 2
245	-6.62789	+	NA	NA	+	NA	-2.23252	+	0.117781	0.00109592	8	-261.209	538.43	1.54462	0.0192258
182	-5.93292	+	-0.662672	NA	+	NA	-2.28748	+	NA	0.00175414	8	-261.21	538.433	1.5471	0.019202		Conditional model:
183	-6.32357	+	NA	1.28429	+	NA	-2.32274	+	NA	0.00183819	8	-261.215	538.441	1.55569	0.0191197			Estimate	Std. Error	z value	Pr(>|z|)
102	-7.01482	+	-0.574383	NA	+	NA	NA	+	0.163983	NA	7	-262.223	538.455	1.5694	0.0189891		(Intercept)	-7.77383	2.87962	-2.7	0.00694	**
103	-7.36737	+	NA	1.01355	+	NA	NA	+	0.173349	NA	7	-262.24	538.49	1.60442	0.0186595		ndvi	-2.30761	1.64937	-1.399	0.16179
229	-7.10838	+	NA	NA	+	NA	NA	+	0.122386	0.0010613	7	-262.24	538.49	1.60451	0.0186587		Dist_Road_K	0.968364	1.41046	0.687	0.49236
39	-6.50096	+	NA	1.26299	+	NA	NA	+	NA	NA	6	-263.243	538.494	1.60812	0.018625		Fencing_2Y	1.25758	0.294632	4.268	1.97e-05	***
166	-6.41273	+	-0.659871	NA	+	NA	NA	+	NA	0.00174989	7	-262.288	538.586	1.69997	0.017789		Water_source	0.113312	0.138956	0.815	0.41481
167	-6.79906	+	NA	1.19556	+	NA	NA	+	NA	0.00183433	7	-262.331	538.671	1.78514	0.0170473		Underpass_typeCulvert	-3.12405	1.52966	-2.042	0.04112	*
189	-7.22792	+	NA	NA	+	0.172106	-2.30834	+	NA	0.00156951	8	-261.476	538.965	2.07936	0.0147153		All_Livestock_1	-0.559686	0.825567	-0.678	0.49781
173	-7.54647	+	NA	NA	+	0.146361	NA	+	NA	0.00160493	7	-262.577	539.164	2.27825	0.0133223		Width_meters	0.000799	0.001636	0.488	0.62521
62	-7.78329	+	-0.631928	NA	+	0.316375	-2.36456	+	NA	NA	8	-261.715	539.441	2.55581	0.011596		Height_meters	0.175877	0.369192	0.476	0.6338
63	-8.11985	+	NA	1.21287	+	0.312709	-2.38597	+	NA	NA	8	-261.768	539.548	2.66284	0.0109918		---
56	-5.84725	+	-0.630332	1.25947	+	NA	-2.35928	+	NA	NA	8	-261.769	539.55	2.66417	0.0109844		Signif. codes: 0 ‘***’ 0.001 ‘**’ 0.01 ‘*’ 0.05 ‘.’ 0.1 ‘ ’ 1
29	-13.2384	+	NA	NA	+	0.909435	-2.49225	NA	NA	NA	6	-263.835	539.677	2.79122	0.0103083
126	-8.41704	+	-0.549467	NA	+	0.281654	-2.28002	+	0.154532	NA	9	-260.835	539.685	2.79915	0.0102675
127	-8.73152	+	NA	0.970596	+	0.277755	-2.30182	+	0.164333	NA	9	-260.855	539.725	2.83953	0.0100623		Family: binomial ( logit )
46	-8.14095	+	-0.627484	NA	+	0.294596	NA	+	NA	NA	7	-262.867	539.744	2.85885	0.00996562		Formula: Impalas ~ ndvi + Fencing_2 + Underpass_type + (1 | Unique_ID) +
184	-6.14096	+	-0.636199	1.18926	+	NA	-2.3302	+	NA	0.00176435	9	-260.879	539.774	2.88844	0.00981924		(1 | Road_Section.x)
93	-13.4556	+	NA	NA	+	0.820478	-2.43361	NA	0.181447	NA	7	-262.883	539.775	2.88925	0.00981528		Data: nomitdata
247	-6.7797	+	NA	1.12375	+	NA	-2.27435	+	0.111499	0.00113938	9	-260.901	539.816	2.93069	0.00961397
110	-8.76952	+	-0.543435	NA	+	0.259099	NA	+	0.159205	NA	8	-261.906	539.825	2.93946	0.00957194		AIC BIC logLik deviance df.resid
246	-6.40945	+	-0.604432	NA	+	NA	-2.24193	+	0.103754	0.00111397	9	-260.908	539.831	2.94578	0.00954171		536.9 581.2 -262.4 524.9 11904
40	-6.33462	+	-0.628061	1.17617	+	NA	NA	+	NA	NA	7	-262.918	539.845	2.95971	0.00947548
120	-6.68862	+	-0.560946	1.04588	+	NA	-2.27396	+	0.158126	NA	9	-260.921	539.857	2.97095	0.00942238		Random effects:
230	-6.89743	+	-0.599296	NA	+	NA	NA	+	0.108839	0.00107729	8	-261.944	539.899	3.01372	0.00922306
47	-8.48205	+	NA	1.13457	+	0.292718	NA	+	NA	NA	7	-262.947	539.904	3.01858	0.00920066		Conditional model:
111	-9.08734	+	NA	0.88938	+	0.256958	NA	+	0.169121	NA	8	-261.951	539.915	3.02949	0.00915059		Groups Name Variance Std.Dev.
231	-7.26404	+	NA	1.03132	+	NA	NA	+	0.117349	0.00109781	8	-261.97	539.953	3.06744	0.00897858		Unique_ID (Intercept) 7.471e+00 2.7332641
104	-7.17518	+	-0.55712	0.959431	+	NA	NA	+	0.162719	NA	8	-261.988	539.988	3.1022	0.00882391		Road_Section.x (Intercept) 1.461e-08 0.0001209
168	-6.61913	+	-0.633445	1.10121	+	NA	NA	+	NA	0.00176072	8	-261.998	540.007	3.12163	0.00873858		Number of obs: 11910, groups: Unique_ID, 72; Road_Section.x, 2
253	-8.24003	+	NA	NA	+	0.236743	-2.26506	+	0.13483	0.000629323	9	-261.009	540.034	3.14807	0.00862381
237	-8.57353	+	NA	NA	+	0.213008	NA	+	0.138286	0.000639438	8	-262.07	540.152	3.26665	0.00812739		Conditional model:
77	-13.9999	+	NA	NA	+	0.813932	NA	NA	0.186517	NA	6	-264.112	540.232	3.3465	0.00780931			Estimate	Std. Error	z value	Pr(>|z|)
13	-13.8076	+	NA	NA	+	0.905928	NA	NA	NA	NA	5	-265.123	540.251	3.36592	0.00773384		(Intercept)	-5.8076	1.0601	-5.478	4.3e-08	***
190	-6.9181	+	-0.648983	NA	+	0.150727	-2.31592	+	NA	0.00152725	9	-261.124	540.263	3.37712	0.00769066		ndvi	-2.3159	1.6437	-1.409	0.158839
191	-7.18572	+	NA	1.22321	+	0.133371	-2.34297	+	NA	0.00163652	9	-261.154	540.324	3.43853	0.00745808		Fencing_2Y	1.2407	0.2935	4.227	2.37e-05	***
174	-7.23582	+	-0.646557	NA	+	0.124513	NA	+	NA	0.00156353	8	-262.227	540.465	3.57962	0.00695011		Underpass_typeCulvert	-4.0132	1.1402	-3.52	0.000432	***
175	-7.5137	+	NA	1.14424	+	0.109644	NA	+	NA	0.00166911	8	-262.288	540.589	3.70337	0.00653309		---
157	-12.3824	+	NA	NA	+	0.745998	-2.4699	NA	NA	0.00155456	7	-263.419	540.848	3.96284	0.00573819		Signif. codes: 0 ‘***’ 0.001 ‘**’ 0.01 ‘*’ 0.05 ‘.’ 0.1 ‘ ’ 1
64	-7.81221	+	-0.610698	1.12743	+	0.290798	-2.39498	+	NA	NA	9	-261.462	540.939	4.0539	0.00548279
248	-6.56534	+	-0.585509	1.06248	+	NA	-2.28392	+	0.0986535	0.00115284	10	-260.621	541.261	4.37575	0.0046678
128	-8.42647	+	-0.533721	0.922088	+	0.259834	-2.31081	+	0.154022	NA	10	-260.626	541.27	4.38424	0.00464804
48	-8.17547	+	-0.607019	1.05108	+	0.270624	NA	+	NA	NA	8	-262.645	541.301	4.41589	0.00457506
30	-13.082	+	-0.462192	NA	+	0.899769	-2.5106	NA	NA	NA	7	-263.66	541.329	4.44309	0.00451326
141	-12.916	+	NA	NA	+	0.737694	NA	NA	NA	0.00159678	6	-264.683	541.373	4.48777	0.00441354
232	-7.05595	+	-0.580162	0.970584	+	NA	NA	+	0.104907	0.00110953	9	-261.696	541.406	4.52068	0.00434151
112	-8.78612	+	-0.528459	0.842525	+	0.238869	NA	+	0.159089	NA	9	-261.726	541.468	4.58195	0.00421054
254	-7.85257	+	-0.57346	NA	+	0.209537	-2.27446	+	0.119515	0.0007018	10	-260.741	541.501	4.61589	0.00413968
255	-8.14922	+	NA	1.01606	+	0.201308	-2.29872	+	0.127753	0.00073325	10	-260.761	541.541	4.65498	0.00405956
94	-13.3448	+	-0.363936	NA	+	0.818218	-2.45004	NA	0.174034	NA	8	-262.777	541.566	4.67996	0.00400917
238	-8.19046	+	-0.568478	NA	+	0.185627	NA	+	0.123356	0.000710442	9	-261.806	541.628	4.74238	0.00388598
31	-13.4245	+	NA	0.311119	+	0.921771	-2.50218	NA	NA	NA	7	-263.819	541.647	4.76165	0.00384872
192	-6.88625	+	-0.62589	1.1352	+	0.114603	-2.34977	+	NA	0.00159276	10	-260.831	541.681	4.79547	0.00378418
239	-8.49957	+	NA	0.933583	+	0.18021	NA	+	0.132236	0.000733033	9	-261.853	541.721	4.83594	0.00370837
221	-13.2122	+	NA	NA	+	0.786885	-2.43351	NA	0.163989	0.000377908	8	-262.863	541.737	4.85189	0.00367892
95	-13.5329	+	NA	0.120746	+	0.825854	-2.4391	NA	0.181535	NA	8	-262.879	541.771	4.88548	0.00361765
14	-13.6688	+	-0.443584	NA	+	0.897373	NA	NA	NA	NA	6	-264.962	541.931	5.0453	0.00333981
176	-7.21316	+	-0.624109	1.05794	+	0.090489	NA	+	NA	0.00162584	9	-261.966	541.948	5.06232	0.00331152
78	-13.9066	+	-0.341612	NA	+	0.812352	NA	NA	0.179717	NA	7	-264.019	542.048	5.16229	0.00315005
205	-13.7526	+	NA	NA	+	0.779907	NA	NA	0.16874	0.000381555	7	-264.092	542.193	5.30737	0.00292964
79	-14.0105	+	NA	0.015772	+	0.814658	NA	NA	0.186534	NA	7	-264.112	542.234	5.34874	0.00286967
15	-13.9377	+	NA	0.209923	+	0.914498	NA	NA	NA	NA	6	-265.116	542.239	5.35336	0.00286304
158	-12.2392	+	-0.461282	NA	+	0.739127	-2.48876	NA	NA	0.00152308	8	-263.244	542.501	5.61496	0.00251202
159	-12.5603	+	NA	0.303506	+	0.756945	-2.48103	NA	NA	0.00157026	8	-263.402	542.817	5.9314	0.00214441
256	-7.77383	+	-0.559686	0.968364	+	0.175877	-2.30761	+	0.113312	0.000799039	11	-260.509	543.039	6.15386	0.00191867
142	-12.7905	+	-0.441955	NA	+	0.731802	NA	NA	NA	0.00156737	7	-264.522	543.054	6.16845	0.00190473
240	-8.12812	+	-0.555105	0.887125	+	0.154654	NA	+	0.118134	0.000797326	10	-261.604	543.227	6.34163	0.00174673
32	-13.2232	+	-0.454539	0.227476	+	0.909133	-2.51782	NA	NA	NA	8	-263.651	543.314	6.42829	0.00167267
143	-13.0388	+	NA	0.201233	+	0.745173	NA	NA	NA	0.00160772	7	-264.676	543.361	6.47501	0.00163405
222	-13.0651	+	-0.373614	NA	+	0.78021	-2.45043	NA	0.154079	0.00042548	9	-262.751	543.517	6.63164	0.00151096
149	-10.4376	+	NA	NA	+	NA	-2.44977	NA	NA	0.00437177	6	-265.764	543.535	6.64961	0.00149744
96	-13.3903	+	-0.361371	0.0691282	+	0.821349	-2.4531	NA	0.174141	NA	9	-262.776	543.566	6.68086	0.00147423
223	-13.2918	+	NA	0.13373	+	0.792031	-2.4396	NA	0.163646	0.000386919	9	-262.859	543.733	6.84699	0.00135672
16	-13.7517	+	-0.439131	0.129046	+	0.902827	NA	NA	NA	NA	7	-264.959	543.928	7.04204	0.00123065
206	-13.6257	+	-0.351235	NA	+	0.774243	NA	NA	0.159603	0.000425666	8	-263.993	543.998	7.11291	0.00118781
133	-10.9684	+	NA	NA	+	NA	NA	NA	NA	0.00437468	5	-267.008	544.021	7.13589	0.00117424
80	-13.8836	+	-0.34289	-0.0333457	+	0.810789	NA	NA	0.179655	NA	8	-264.019	544.05	7.16448	0.00115757
207	-13.7703	+	NA	0.0283339	+	0.781042	NA	NA	0.168674	0.000383478	8	-264.092	544.195	7.3097	0.0010765
160	-12.374	+	-0.453072	0.221304	+	0.7474	-2.49681	NA	NA	0.00153552	9	-263.235	544.485	7.59942	0.000931325
21	-11.0979	+	NA	NA	+	NA	-2.47443	NA	NA	NA	5	-267.366	544.737	7.85114	0.000821188
144	-12.8675	+	-0.437296	0.121662	+	0.736474	NA	NA	NA	0.00157445	8	-264.519	545.051	8.16551	0.000701742
5	-11.6555	+	NA	NA	+	NA	NA	NA	NA	NA	4	-268.638	545.279	8.39359	0.000626109
150	-10.3416	+	-0.366118	NA	+	NA	-2.46189	NA	NA	0.00433388	7	-265.654	545.318	8.43274	0.000613971
213	-10.7518	+	NA	NA	+	NA	-2.44413	NA	0.0789265	0.00387988	7	-265.67	545.35	8.46444	0.000604318
224	-13.1156	+	-0.370652	0.0819649	+	0.783459	-2.45407	NA	0.153942	0.000430745	10	-262.75	545.518	8.63201	0.000555749
151	-10.436	+	NA	-0.00398281	+	NA	-2.44972	NA	NA	0.00437122	7	-265.764	545.538	8.65196	0.000550231
85	-11.7339	+	NA	NA	+	NA	-2.46045	NA	0.194133	NA	6	-266.852	545.71	8.82461	0.000504726
134	-10.8812	+	-0.352078	NA	+	NA	NA	NA	NA	0.00433948	6	-266.907	545.821	8.93524	0.000477564
197	-11.2833	+	NA	NA	+	NA	NA	NA	0.0807263	0.00386891	6	-266.909	545.826	8.9404	0.000476335
208	-13.612	+	-0.352032	-0.0210424	+	0.773366	NA	NA	0.159625	0.000424408	9	-263.993	546.001	9.11573	0.000436354
135	-10.9301	+	NA	-0.0945087	+	NA	NA	NA	NA	0.0043609	6	-267.007	546.021	9.13533	0.0004321
69	-12.2875	+	NA	NA	+	NA	NA	NA	0.196571	NA	5	-268.11	546.226	9.34015	0.000390039
22	-11.0204	+	-0.347909	NA	+	NA	-2.48555	NA	NA	NA	6	-267.267	546.541	9.65562	0.000333122
23	-11.0068	+	NA	-0.249584	+	NA	-2.46969	NA	NA	NA	6	-267.359	546.725	9.8396	0.000303846
6	-11.5857	+	-0.335019	NA	+	NA	NA	NA	NA	NA	5	-268.546	547.098	10.2122	0.000252199
214	-10.6337	+	-0.335941	NA	+	NA	-2.45569	NA	0.0704925	0.00389822	8	-265.58	547.171	10.2856	0.000243109
7	-11.5285	+	NA	-0.336681	+	NA	NA	NA	NA	NA	5	-268.625	547.256	10.3702	0.000233045
152	-10.3179	+	-0.367599	-0.0586924	+	NA	-2.46045	NA	NA	0.00432514	8	-265.654	547.32	10.4344	0.000225676
215	-10.7187	+	NA	-0.0918718	+	NA	-2.44164	NA	0.0798483	0.00386042	8	-265.669	547.35	10.4646	0.000222301
86	-11.6545	+	-0.286501	NA	+	NA	-2.46963	NA	0.187839	NA	7	-266.786	547.582	10.6963	0.000197986
198	-11.1766	+	-0.321199	NA	+	NA	NA	NA	0.0728131	0.00388732	7	-266.827	547.662	10.7769	0.000190164
87	-11.5831	+	NA	-0.397925	+	NA	-2.45086	NA	0.197955	NA	7	-266.83	547.669	10.7834	0.000189541
136	-10.8188	+	-0.355987	-0.148294	+	NA	NA	NA	NA	0.00431701	7	-266.904	547.817	10.9311	0.000176048
199	-11.2135	+	NA	-0.183875	+	NA	NA	NA	0.0826085	0.00382888	7	-266.904	547.818	10.9323	0.000175947
70	-12.2167	+	-0.273523	NA	+	NA	NA	NA	0.190687	NA	6	-268.051	548.109	11.2231	0.000152133
71	-12.0959	+	NA	-0.483476	+	NA	NA	NA	0.201288	NA	6	-268.078	548.162	11.2766	0.000148117
24	-10.9094	+	-0.353248	-0.296653	+	NA	-2.47993	NA	NA	NA	7	-267.257	548.524	11.6385	0.000123603
8	-11.4379	+	-0.342233	-0.383063	+	NA	NA	NA	NA	NA	6	-268.53	549.067	12.1812	9.42e-05
216	-10.5843	+	-0.338818	-0.131902	+	NA	-2.452	NA	0.0717417	0.00387031	9	-265.577	549.169	12.2833	8.95e-05
88	-11.4874	+	-0.294386	-0.42963	+	NA	-2.45937	NA	0.191765	NA	8	-266.761	549.534	12.648	7.46e-05
200	-11.0887	+	-0.326318	-0.223385	+	NA	NA	NA	0.0749863	0.00383825	8	-266.819	549.65	12.764	7.04e-05
72	-12.0075	+	-0.28335	-0.51476	+	NA	NA	NA	0.195462	NA	7	-268.014	550.037	13.1511	5.8e-05
97	-6.48869	+	NA	NA	NA	NA	NA	+	0.172849	NA	5	-271.353	552.71	15.8246	1.52e-05
33	-5.58421	+	NA	NA	NA	NA	NA	+	NA	NA	4	-272.404	552.81	15.9249	1.45e-05
161	-5.87376	+	NA	NA	NA	NA	NA	+	NA	0.00179201	5	-271.517	553.04	16.1541	1.29e-05
105	-8.31705	+	NA	NA	NA	0.272255	NA	+	0.167297	NA	6	-271.014	554.034	17.1489	7.86e-06
41	-7.70225	+	NA	NA	NA	0.312239	NA	+	NA	NA	5	-272.052	554.109	17.2238	7.57e-06
35	-5.79468	+	NA	1.27098	NA	NA	NA	+	NA	NA	5	-272.086	554.178	17.2923	7.32e-06
99	-6.65002	+	NA	1.02543	NA	NA	NA	+	0.170935	NA	6	-271.089	554.185	17.2999	7.29e-06
225	-6.38891	+	NA	NA	NA	NA	NA	+	0.12092	0.00103608	6	-271.105	554.217	17.3316	7.17e-06
163	-6.08716	+	NA	1.20271	NA	NA	NA	+	NA	0.00179977	6	-271.185	554.377	17.4913	6.62e-06
113	-6.34067	+	NA	NA	NA	NA	-0.62113	+	0.171663	NA	6	-271.266	554.54	17.6541	6.11e-06
98	-6.39018	+	-0.321122	NA	NA	NA	NA	+	0.167323	NA	6	-271.268	554.542	17.6569	6.1e-06
34	-5.49451	+	-0.386978	NA	NA	NA	NA	+	NA	NA	5	-272.278	554.561	17.6758	6.04e-06
49	-5.41902	+	NA	NA	NA	NA	-0.713488	+	NA	NA	5	-272.289	554.584	17.6982	5.97e-06
162	-5.77734	+	-0.395326	NA	NA	NA	NA	+	NA	0.00175164	6	-271.385	554.778	17.8924	5.42e-06
177	-5.71879	+	NA	NA	NA	NA	-0.672187	+	NA	0.00179255	6	-271.416	554.84	17.954	5.26e-06
169	-6.80929	+	NA	NA	NA	0.142715	NA	+	NA	0.00157589	6	-271.442	554.891	18.005	5.12e-06
43	-7.72961	+	NA	1.14268	NA	0.285786	NA	+	NA	NA	6	-271.798	555.602	18.7166	3.59e-06
107	-8.32507	+	NA	0.902893	NA	0.250185	NA	+	0.166738	NA	7	-270.809	555.628	18.7428	3.54e-06
227	-6.54768	+	NA	1.042	NA	NA	NA	+	0.116049	0.00107176	7	-270.826	555.661	18.7759	3.48e-06
121	-8.20383	+	NA	NA	NA	0.279187	-0.659466	+	0.165865	NA	7	-270.916	555.842	18.9568	3.18e-06
57	-7.57482	+	NA	NA	NA	0.319437	-0.749355	+	NA	NA	6	-271.926	555.86	18.9741	3.16e-06
233	-7.82364	+	NA	NA	NA	0.208413	NA	+	0.136492	0.000623725	7	-270.939	555.887	19.0012	3.11e-06
42	-7.5363	+	-0.365915	NA	NA	0.299609	NA	+	NA	NA	6	-271.941	555.888	19.0026	3.11e-06
106	-8.16754	+	-0.291419	NA	NA	0.262944	NA	+	0.162392	NA	7	-270.944	555.898	19.0128	3.1e-06
51	-5.62515	+	NA	1.29245	NA	NA	-0.739366	+	NA	NA	6	-271.964	555.935	19.049	3.04e-06
36	-5.70571	+	-0.362511	1.22191	NA	NA	NA	+	NA	NA	6	-271.978	555.962	19.0768	3e-06
115	-6.49675	+	NA	1.04623	NA	NA	-0.647157	+	0.1695	NA	7	-270.995	556	19.1149	2.94e-06
73	-13.2184	+	NA	NA	NA	0.805587	NA	NA	0.184094	NA	5	-272.998	556.001	19.1158	2.94e-06
9	-13.0307	+	NA	NA	NA	0.896946	NA	NA	NA	NA	4	-274.001	556.006	19.1203	2.93e-06
226	-6.28055	+	-0.341286	NA	NA	NA	NA	+	0.114305	0.00104317	7	-271.009	556.027	19.1413	2.9e-06
100	-6.55579	+	-0.300424	0.996116	NA	NA	NA	+	0.165984	NA	7	-271.016	556.041	19.1553	2.88e-06
241	-6.2409	+	NA	NA	NA	NA	-0.621794	+	0.119472	0.00104592	7	-271.019	556.047	19.1612	2.87e-06
164	-5.99125	+	-0.365304	1.14996	NA	NA	NA	+	NA	0.00176251	7	-271.074	556.157	19.2718	2.72e-06
179	-5.92707	+	NA	1.22538	NA	NA	-0.703431	+	NA	0.00179998	7	-271.074	556.158	19.2721	2.72e-06
171	-6.77417	+	NA	1.15272	NA	0.105357	NA	+	NA	0.00164111	7	-271.145	556.3	19.4141	2.53e-06
50	-5.33815	+	-0.37474	NA	NA	NA	-0.687914	+	NA	NA	6	-272.172	556.351	19.4657	2.47e-06
114	-6.24977	+	-0.311163	NA	NA	NA	-0.601613	+	0.166341	NA	7	-271.187	556.383	19.4976	2.43e-06
178	-5.63111	+	-0.384106	NA	NA	NA	-0.646054	+	NA	0.00175342	7	-271.292	556.594	19.7081	2.19e-06
170	-6.64123	+	-0.382392	NA	NA	0.130972	NA	+	NA	0.00155511	7	-271.319	556.647	19.7618	2.13e-06
185	-6.7011	+	NA	NA	NA	0.15097	-0.697423	+	NA	0.00156352	7	-271.333	556.675	19.7899	2.1e-06
137	-12.1545	+	NA	NA	NA	0.731644	NA	NA	NA	0.00156638	5	-273.568	557.142	20.2565	1.66e-06
59	-7.5987	+	NA	1.16316	NA	0.292836	-0.772018	+	NA	NA	7	-271.664	557.337	20.4516	1.51e-06
44	-7.57232	+	-0.342672	1.09704	NA	0.274694	NA	+	NA	NA	7	-271.701	557.411	20.5255	1.45e-06
123	-8.20747	+	NA	0.922718	NA	0.256973	-0.681926	+	0.165119	NA	8	-270.706	557.423	20.5376	1.44e-06
235	-7.74795	+	NA	0.946303	NA	0.174945	NA	+	0.130518	0.000717779	8	-270.713	557.439	20.553	1.43e-06
243	-6.39323	+	NA	1.06463	NA	NA	-0.652145	+	0.114186	0.00108381	8	-270.731	557.474	20.5885	1.41e-06
228	-6.44429	+	-0.318471	1.0087	NA	NA	NA	+	0.110249	0.00107618	8	-270.743	557.498	20.6127	1.39e-06
108	-8.18465	+	-0.273464	0.878578	NA	0.241872	NA	+	0.162261	NA	8	-270.749	557.51	20.6249	1.38e-06
25	-12.8078	+	NA	NA	NA	0.898284	-0.887659	NA	NA	NA	5	-273.824	557.653	20.7675	1.29e-06
58	-7.41923	+	-0.353667	NA	NA	0.307113	-0.726673	+	NA	NA	7	-271.822	557.654	20.7683	1.29e-06
89	-13.0159	+	NA	NA	NA	0.808151	-0.827247	NA	0.182141	NA	6	-272.844	557.696	20.81	1.26e-06
249	-7.7162	+	NA	NA	NA	0.215754	-0.652707	+	0.135376	0.000619845	8	-270.844	557.699	20.8136	1.26e-06
122	-8.06275	+	-0.281347	NA	NA	0.270089	-0.643083	+	0.161159	NA	8	-270.852	557.716	20.8308	1.25e-06
234	-7.63518	+	-0.31169	NA	NA	0.195025	NA	+	0.129442	0.000657311	8	-270.859	557.731	20.8452	1.24e-06
52	-5.54508	+	-0.349562	1.2443	NA	NA	-0.715442	+	NA	NA	7	-271.863	557.735	20.8496	1.24e-06
116	-6.41022	+	-0.289798	1.01725	NA	NA	-0.628856	+	0.16477	NA	8	-270.927	557.867	20.9812	1.16e-06
242	-6.14021	+	-0.331597	NA	NA	NA	-0.601334	+	0.113072	0.00105257	8	-270.928	557.868	20.9825	1.16e-06
10	-12.9684	+	-0.210624	NA	NA	0.893043	NA	NA	NA	NA	5	-273.965	557.935	21.0499	1.12e-06
180	-5.84007	+	-0.353197	1.17356	NA	NA	-0.67933	+	NA	0.00176415	8	-270.971	557.954	21.068	1.11e-06
201	-12.9826	+	NA	NA	NA	0.773187	NA	NA	0.167104	0.00036372	6	-272.979	557.965	21.0793	1.1e-06
74	-13.1877	+	-0.118671	NA	NA	0.804929	NA	NA	0.182053	NA	6	-272.987	557.981	21.0955	1.09e-06
11	-13.1629	+	NA	0.213266	NA	0.905637	NA	NA	NA	NA	5	-273.994	557.992	21.1067	1.09e-06
75	-13.2351	+	NA	0.0250166	NA	0.806733	NA	NA	0.184124	NA	6	-272.998	558.003	21.1175	1.08e-06
187	-6.66191	+	NA	1.17241	NA	0.113452	-0.721714	+	NA	0.00162892	8	-271.029	558.069	21.1838	1.05e-06
172	-6.61826	+	-0.356445	1.10485	NA	0.0956555	NA	+	NA	0.00161961	8	-271.04	558.092	21.2063	1.03e-06
186	-6.54317	+	-0.370534	NA	NA	0.139415	-0.672153	+	NA	0.00154385	8	-271.218	558.448	21.5627	8.65e-07
153	-11.9505	+	NA	NA	NA	0.734894	-0.862273	NA	NA	0.00154918	6	-273.401	558.81	21.9244	7.22e-07
138	-12.0977	+	-0.209655	NA	NA	0.728821	NA	NA	NA	0.00155458	6	-273.533	559.072	22.1868	6.33e-07
139	-12.2799	+	NA	0.205675	NA	0.739263	NA	NA	NA	0.00157767	6	-273.561	559.128	22.2425	6.16e-07
60	-7.45204	+	-0.329522	1.11835	NA	0.282067	-0.750307	+	NA	NA	8	-271.575	559.161	22.2759	6.06e-07
251	-7.63395	+	NA	0.966349	NA	0.181892	-0.676261	+	0.129084	0.000716594	9	-270.611	559.237	22.3517	5.83e-07
236	-7.57187	+	-0.294834	0.921137	NA	0.163023	NA	+	0.124115	0.000746692	9	-270.643	559.301	22.4154	5.65e-07
124	-8.07592	+	-0.262596	0.89863	NA	0.24891	-0.666159	+	0.160858	NA	9	-270.65	559.315	22.4296	5.61e-07
244	-6.29774	+	-0.308054	1.03158	NA	NA	-0.633091	+	0.108628	0.00108795	9	-270.654	559.322	22.4367	5.59e-07
250	-7.53754	+	-0.301369	NA	NA	0.202676	-0.634387	+	0.128585	0.000652526	9	-270.77	559.554	22.6687	4.98e-07
26	-12.7491	+	-0.201242	NA	NA	0.894414	-0.879787	NA	NA	NA	6	-273.791	559.589	22.7037	4.89e-07
27	-12.9574	+	NA	0.245484	NA	0.908224	-0.894198	NA	NA	NA	6	-273.814	559.635	22.7493	4.78e-07
217	-12.7823	+	NA	NA	NA	0.775989	-0.826262	NA	0.165315	0.000361359	7	-272.825	559.66	22.7747	4.72e-07
90	-12.9869	+	-0.111835	NA	NA	0.807443	-0.823912	NA	0.180223	NA	7	-272.834	559.678	22.7926	4.68e-07
91	-13.0531	+	NA	0.056907	NA	0.810738	-0.829462	NA	0.182199	NA	7	-272.844	559.696	22.8109	4.63e-07
129	-10.2258	+	NA	NA	NA	NA	NA	NA	NA	0.00432505	4	-275.908	559.82	22.9346	4.36e-07
188	-6.51621	+	-0.343678	1.12528	NA	0.103922	-0.697836	+	NA	0.00160871	9	-270.931	559.877	22.9918	4.23e-07
12	-13.0815	+	-0.204644	0.178064	NA	0.900482	NA	NA	NA	NA	6	-273.96	559.927	23.0412	4.13e-07
202	-12.9402	+	-0.126493	NA	NA	0.771203	NA	NA	0.164253	0.000377773	7	-272.966	559.942	23.0564	4.1e-07
203	-13.0058	+	NA	0.0370617	NA	0.774673	NA	NA	0.16703	0.000366093	7	-272.979	559.967	23.0811	4.05e-07
76	-13.1939	+	-0.118326	0.00909153	NA	0.80535	NA	NA	0.182069	NA	7	-272.987	559.983	23.0978	4.01e-07
154	-11.8965	+	-0.200956	NA	NA	0.732025	-0.854742	NA	NA	0.00153803	7	-273.369	560.747	23.861	2.74e-07
155	-12.0926	+	NA	0.237711	NA	0.743648	-0.869489	NA	NA	0.0015619	7	-273.391	560.791	23.9055	2.68e-07
140	-12.2047	+	-0.203246	0.171152	NA	0.73531	NA	NA	NA	0.00156434	7	-273.527	561.064	24.1781	2.34e-07
1	-10.9177	+	NA	NA	NA	NA	NA	NA	NA	NA	3	-277.532	561.067	24.1811	2.34e-07
252	-7.4682	+	-0.283751	0.941324	NA	0.170341	-0.658601	+	0.122961	0.00074432	10	-270.546	561.111	24.2251	2.28e-07
145	-10.0237	+	NA	NA	NA	NA	-0.844263	NA	NA	0.0043224	5	-275.748	561.502	24.616	1.88e-07
28	-12.8813	+	-0.194069	0.211793	NA	0.903209	-0.885748	NA	NA	NA	7	-273.784	561.577	24.691	1.81e-07
193	-10.5363	+	NA	NA	NA	NA	NA	NA	0.079997	0.00382255	5	-275.81	561.626	24.7401	1.77e-07
218	-12.7423	+	-0.119585	NA	NA	0.774043	-0.822741	NA	0.162633	0.000374449	8	-272.814	561.64	24.7548	1.75e-07
219	-12.8245	+	NA	0.069028	NA	0.778733	-0.829005	NA	0.165166	0.000365822	8	-272.824	561.661	24.7752	1.74e-07
92	-13.0149	+	-0.110224	0.0419401	NA	0.809367	-0.825616	NA	0.180294	NA	8	-272.834	561.68	24.7945	1.72e-07
130	-10.1925	+	-0.141966	NA	NA	NA	NA	NA	NA	0.00431161	5	-275.892	561.789	24.9039	1.63e-07
131	-10.1914	+	NA	-0.0844658	NA	NA	NA	NA	NA	0.00431264	5	-275.907	561.82	24.9342	1.6e-07
204	-12.9533	+	-0.125725	0.0204804	NA	0.772045	NA	NA	0.164235	0.000378886	8	-272.966	561.944	25.0589	1.51e-07
65	-11.5383	+	NA	NA	NA	NA	NA	NA	0.195594	NA	4	-277.005	562.013	25.1272	1.46e-07
17	-10.7002	+	NA	NA	NA	NA	-0.872797	NA	NA	NA	4	-277.361	562.725	25.8395	1.02e-07
156	-12.0218	+	-0.193267	0.204411	NA	0.739744	-0.861243	NA	NA	0.00154946	8	-273.361	562.733	25.8479	1.02e-07
2	-10.8917	+	-0.129198	NA	NA	NA	NA	NA	NA	NA	4	-277.519	563.041	26.1556	8.7e-08
3	-10.7952	+	NA	-0.324513	NA	NA	NA	NA	NA	NA	4	-277.521	563.044	26.1589	8.69e-08
209	-10.3343	+	NA	NA	NA	NA	-0.837939	NA	0.0791093	0.00382652	6	-275.653	563.312	26.4266	7.6e-08
146	-9.99364	+	-0.132348	NA	NA	NA	-0.838753	NA	NA	0.00430969	6	-275.734	563.475	26.5899	7e-08
147	-10.0006	+	NA	-0.0580382	NA	NA	-0.843055	NA	NA	0.00431389	6	-275.748	563.503	26.6171	6.91e-08
194	-10.5017	+	-0.113151	NA	NA	NA	NA	NA	0.0776271	0.00382709	6	-275.8	563.607	26.7218	6.56e-08
195	-10.4705	+	NA	-0.172422	NA	NA	NA	NA	0.0817504	0.00378496	6	-275.806	563.618	26.7328	6.52e-08
220	-12.7756	+	-0.117587	0.0532621	NA	0.776188	-0.824853	NA	0.162559	0.000377763	9	-272.813	563.642	26.7565	6.44e-08
81	-11.3248	+	NA	NA	NA	NA	-0.856358	NA	0.194404	NA	5	-276.84	563.684	26.7988	6.31e-08
132	-10.1486	+	-0.144746	-0.105478	NA	NA	NA	NA	NA	0.00429569	6	-275.891	563.788	26.9027	5.99e-08
67	-11.351	+	NA	-0.46972	NA	NA	NA	NA	0.200135	NA	5	-276.974	563.952	27.0665	5.52e-08
66	-11.5204	+	-0.0725653	NA	NA	NA	NA	NA	0.194231	NA	5	-277.001	564.006	27.1207	5.37e-08
18	-10.6772	+	-0.118751	NA	NA	NA	-0.867713	NA	NA	NA	5	-277.35	564.704	27.8186	3.79e-08
19	-10.5892	+	NA	-0.298644	NA	NA	-0.868328	NA	NA	NA	5	-277.351	564.707	27.8213	3.78e-08
4	-10.7605	+	-0.135741	-0.342404	NA	NA	NA	NA	NA	NA	5	-277.506	565.017	28.131	3.24e-08
210	-10.3032	+	-0.10394	NA	NA	NA	-0.833735	NA	0.0769397	0.00383044	7	-275.644	565.297	28.4119	2.82e-08
211	-10.2802	+	NA	-0.145679	NA	NA	-0.834565	NA	0.0805917	0.00379501	7	-275.649	565.308	28.4224	2.8e-08
148	-9.96202	+	-0.13439	-0.0776954	NA	NA	-0.837081	NA	NA	0.00429819	7	-275.733	565.476	28.5905	2.58e-08
196	-10.4288	+	-0.117522	-0.186348	NA	NA	NA	NA	0.0794311	0.00378637	7	-275.795	565.599	28.7133	2.42e-08
83	-11.1512	+	NA	-0.445398	NA	NA	-0.847932	NA	0.19871	NA	6	-276.812	565.631	28.7451	2.38e-08
82	-11.3097	+	-0.0626281	NA	NA	NA	-0.853771	NA	0.193223	NA	6	-276.837	565.68	28.7947	2.33e-08
68	-11.3266	+	-0.0819783	-0.478554	NA	NA	NA	NA	0.198664	NA	6	-276.968	565.944	29.058	2.04e-08
20	-10.5583	+	-0.124795	-0.315301	NA	NA	-0.862695	NA	NA	NA	6	-277.338	566.684	29.7984	1.41e-08
212	-10.2428	+	-0.107655	-0.158537	NA	NA	-0.830061	NA	0.0784737	0.00379614	8	-275.64	567.292	30.4068	1.04e-08
84	-11.1303	+	-0.0716003	-0.453098	NA	NA	-0.844979	NA	0.197424	NA	7	-276.808	567.625	30.7394	8.8e-09

[truncated: 7 more sheets: Leopard, Lion, Livestock, Mongoose, Zebra, Wildlife, Kudu]
